# Supplementary material for: Intelligent consensus prediction for addressing ecotoxicological effects of diverse pesticides on California quail
Source: Royal Society of Chemistry journal article supplement (doi:10.1039/d4em00742e), 2025-01-01
Supplement: d4em00742e2.xlsx [file d4em00742e2.xlsx]

## Sheet: California quail
sl no.	smile	pLD 50
1	COP(=O)(OC)OC(=CC(=O)N(C)C)C	2.09869
2	CCOP(=S)(OCC)OC1=NC(Cl)=C(Cl)C=C1Cl	0.71039
3	COP(=S)(OC)OC1=CC=C(C=C1)SC2=CC=C(C=C2)OP(=S)(OC)OC	1.3924
4	ClC1=CC=C(C=C1)C(C1=CC=C(Cl)C=C1)C(Cl)(Cl)Cl	-0.22493
5	CCC(=O)OC(C(Cl)(Cl)Cl)P(=O)(OC)OC	0.7232
6	CC1=C(C=CC(=C1)OP(=S)(OC)OC)SC	1.26852
7	CCOP(=O)(OCC)SC1=CC=C(C=C1)[N+](=O)[O-]	1.23644
8	C1CN2CC3=CCOC4CC(=O)N5C6C4C3CC2C61C7=CC=CC=C75	0.47511
9	C1C2C(C(C1Cl)Cl)C3(C(=C(C2(C3(Cl)Cl)Cl)Cl)Cl)Cl	1.46331
10	C(C(=O)[O-])F	1.22114
11	CNC(=O)OC1=CC=CC2=CC=CC=C21	-0.99732
12	C1C2C3C(C1C4C2O4)C5(C(=C(C3(C5(Cl)Cl)Cl)Cl)Cl)Cl	2.50526
13	CCOC(=O)CC(C(=O)OCC)SP(=S)(OC)OC.COC1=CC=C(C=C1)C(C2=CC=C(C=C2)OC)C(Cl)(Cl)Cl	-0.47104
14	C1=CC(=CC=C1C(C2=CC=C(C=C2)Cl)C(Cl)Cl)Cl	-0.37561
15	C1=CC(=C(C=C1O)C(F)(F)F)[N+](=O)[O-]	-0.42097
16	CC(C)OC1=CC=CC=C1OC(=O)NC	0.90741
17	CCOP(=S)(OCC)OC1=CC=C(C=C1)S(=O)C	2.41355
18	CNC(=O)O/N=C/C(C)(C)SC	1.61012
19	P(SCCS(CC)=O)(OC)(OC)=O	0.71389
20	CC1=CC(=CC(=C1N(C)C)C)OC(=O)NC	1.49328
21	CNC(=O)OC1=C2C=CSC2=CC=C1	-0.34904
22	CNC(=O)OC1=C2C=CSC2=CC=C1	-0.73268
23	CCOP(=S)(C1=CC=CC=C1)OC2=CC=C(C=C2)[N+](=O)[O-]	0.94974
24	COP(=S)(OC)OC1=NC(=C(C=C1Cl)Cl)Cl	-0.01516
25	CC1(C2C(C(C1(C(C2Cl)Cl)C(Cl)Cl)Cl)Cl)C(Cl)Cl	1.24204
26	CCOP(=O)(OCC)SCCSCC	1.38695
27	CC(=CC1C(C1(C)C)C(=O)OCC2=COC(=C2)CC3=CC=CC=C3)C	-0.7715
28	CC1=CC(=C(C(=C1)OC(=O)NC)C)C	-0.00387
29	F[As-](F)(F)(F)(F)F	-0.08356
30	COP(=S)(C1=CC=CC=C1)OC2=CC(=C(C=C2Cl)Br)Cl	1.14959
31	CCOP(=O)(NC(C)C)OC1=CC(=C(C=C1)SC)C	2.21956
32	CC1(C(C1C(=O)OCC2=COC(=C2)CC3=CC=CC=C3)C=C4CCCC4)C	0.41871
33	CNC(=O)OC1=CC=CC=C1CCCSC	0.36623
34	CC(=NOC(=O)NC)SCCC#N	0.88883

## Sheet: Model M1 PLS(train-test) 
No.	nBM	F03[C-P]	B07[S-S]	nR=Cs	pLD 50
12	1	0	0	2	2.50526
21	11	0	0	0	-0.34904
28	7	0	0	0	-0.00387
31	7	5	0	0	2.21956
11	12	0	0	0	-0.99732
13	15	2	0	0	-0.47104
5	2	1	0	0	0.7232
8	8	0	0	1	0.47511
29	0	0	0	0	-0.08356
18	2	0	0	0	1.61012
25	0	0	0	0	1.24204
14	12	0	0	0	-0.37561
1	3	2	0	2	2.09869
16	7	0	0	0	0.90741
3	14	4	1	0	1.3924
9	1	0	0	2	1.46331
34	3	0	0	0	0.88883
30	13	4	0	0	1.14959
15	8	0	0	0	-0.42097
33	7	0	0	0	0.36623
6	7	2	1	0	1.26852
19	2	1	0	0	0.71389
20	7	0	0	0	1.49328
27	13	0	0	1	-0.7715
22	11	0	0	0	-0.73268
24	7	1	0	0	-0.01516
No.	nBM	F03[C-P]	B07[S-S]	nR=Cs	pLD 50
32	13	0	0	1	0.41871
26	1	3	0	0	1.38695
10	1	0	0	0	1.22114
23	15	5	0	0	0.94974
17	8	4	1	0	2.41355
7	9	4	0	0	1.23644
4	12	0	0	0	-0.22493
2	7	3	0	0	0.71039

## Sheet: Model M2 PLS(train-test)
No.	nBM	F03[C-P]	nR=Cs	F06[S-P]	pLD 50
12	1	0	2	0	2.50526
21	11	0	0	0	-0.34904
28	7	0	0	0	-0.00387
31	7	5	0	1	2.21956
11	12	0	0	0	-0.99732
13	15	2	0	0	-0.47104
5	2	1	0	0	0.7232
8	8	0	1	0	0.47511
29	0	0	0	0	-0.08356
18	2	0	0	0	1.61012
25	0	0	0	0	1.24204
14	12	0	0	0	-0.37561
1	3	2	2	0	2.09869
16	7	0	0	0	0.90741
3	14	4	0	2	1.3924
9	1	0	2	0	1.46331
34	3	0	0	0	0.88883
30	13	4	0	0	1.14959
15	8	0	0	0	-0.42097
33	7	0	0	0	0.36623
6	7	2	0	1	1.26852
19	2	1	0	0	0.71389
20	7	0	0	0	1.49328
27	13	0	1	0	-0.7715
22	11	0	0	0	-0.73268
24	7	1	0	0	-0.01516
No.	nBM	F03[C-P]	nR=Cs	F06[S-P]	pLD 50
32	13	0	1	0	0.41871
26	1	3	0	0	1.38695
10	1	0	0	0	1.22114
23	15	5	0	0	0.94974
17	8	4	0	1	2.41355
7	9	4	0	0	1.23644
4	12	0	0	0	-0.22493
2	7	3	0	0	0.71039

## Sheet: Model M3 PLS(train-test)
No.	F03[C-P]	B07[S-S]	Fsp3	RBN	pLD 50
12	0	0	0.83333	0	2.50526
21	0	0	0.1	2	-0.34904
28	0	0	0.36364	2	-0.00387
31	5	0	0.53846	7	2.21956
11	0	0	0.08333	2	-0.99732
13	2	0	0.46154	15	-0.47104
5	1	0	0.85714	6	0.7232
8	0	0	0.57143	0	0.47511
29	0	0	0	0	-0.08356
18	0	0	0.71429	4	1.61012
25	0	0	1	0	1.24204
14	0	0	0.14286	2	-0.37561
1	2	0	0.625	5	2.09869
16	0	0	0.36364	4	0.90741
3	4	1	0.25	10	1.3924
9	0	0	0.8	0	1.46331
34	0	0	0.57143	5	0.88883
30	4	0	0.07692	4	1.14959
15	0	0	0.14286	1	-0.42097
33	0	0	0.41667	6	0.36623
6	2	1	0.4	5	1.26852
19	1	0	1	7	0.71389
20	0	0	0.41667	3	1.49328
27	0	0	0.40909	7	-0.7715
22	0	0	0.1	2	-0.73268
24	1	0	0.28571	4	-0.01516
No.	F03[C-P]	B07[S-S]	Fsp3	RBN	pLD 50
32	0	0	0.45833	7	0.41871
26	3	0	1	9	1.38695
10	0	0	0.5	0	1.22114
23	5	0	0.14286	6	0.94974
17	4	1	0.45455	7	2.41355
7	4	0	0.4	7	1.23644
4	0	0	0.14286	2	-0.22493
2	3	0	0.44444	6	0.71039

## Sheet: Model M4 PLS(train-test)
No.	AP	Me	F04[C-P]	F03[O-S]	pLD 50
12	0	1.05388	0	0	2.50526
21	0.642857	1.01597	0	0	-0.34904
28	0.428571	0.99799	0	0	-0.00387
31	0.315789	0.99645	2	0	2.21956
11	0.666667	1.00671	0	0	-0.99732
13	0.3	1.02034	1	2	-0.47104
5	0	1.05896	1	0	0.7232
8	0.24	0.99349	0	0	0.47511
29	0	1.39321	0	0	-0.08356
18	0	1.00908	0	0	1.61012
25	0	1.05507	0	0	1.24204
14	0.666667	1.01714	0	0	-0.37561
1	0	1.02522	1	0	2.09869
16	0.4	1.00896	0	0	0.90741
3	0.444444	1.01834	4	0	1.3924
9	0	1.07395	0	0	1.46331
34	0	1.02378	0	1	0.88883
30	0.6	1.02558	3	0	1.14959
15	0.428571	1.12626	0	0	-0.42097
33	0.375	0.99702	0	0	0.36623
6	0.375	1.00575	2	0	1.26852
19	0	1.01805	0	0	0.71389
20	0.375	0.99785	0	0	1.49328
27	0.44	0.98958	0	0	-0.7715
22	0.642857	1.01597	0	0	-0.73268
24	0.375	1.06625	2	0	-0.01516
No.	AP	Me	F04[C-P]	F03[O-S]	pLD 50
32	0.407407	0.98822	0	0	0.41871
26	0	0.99834	0	0	1.38695
10	0	1.14181	0	0	1.22114
23	0.571429	1.01849	3	0	0.94974
17	0.333333	1.01111	2	0	2.41355
7	0.333333	1.03045	2	0	1.23644
4	0.631579	1.0287	0	0	-0.22493
2	0.333333	1.04452	2	0	0.71039

## Sheet: Model M5 PLS(train-test)
No.	F03[C-P]	AP	T(P..Cl)	C%	pLD 50
12	0	0	0	44.4444	2.50526
21	0	0.642857	0	43.4783	-0.34904
28	0	0.428571	0	37.931	-0.00387
31	5	0.315789	0	31.7073	2.21956
11	0	0.666667	0	46.1538	-0.99732
13	2	0.3	0	35.1351	-0.47104
5	1	0	9	25	0.7232
8	0	0.24	0	44.6809	0.47511
29	0	0	0	0	-0.08356
18	0	0	0	26.9231	1.61012
25	0	0	0	35.7143	1.24204
14	0	0.666667	0	50	-0.37561
1	2	0	0	25.8065	2.09869
16	0	0.4	0	36.6667	0.90741
3	4	0.444444	0	34.0426	1.3924
9	0	0	0	41.6667	1.46331
34	0	0	0	29.1667	0.88883
30	4	0.6	9	43.3333	1.14959
15	0	0.428571	0	38.8889	-0.42097
33	0	0.375	0	36.3636	0.36623
6	2	0.375	0	32.2581	1.26852
19	1	0	0	21.4286	0.71389
20	0	0.375	0	35.2941	1.49328
27	0	0.44	0	43.1373	-0.7715
22	0	0.642857	0	43.4783	-0.73268
24	1	0.375	15	30.4348	-0.01516
No.	F03[C-P]	AP	T(P..Cl)	C%	pLD 50
32	0	0.407407	0	43.6364	0.41871
26	3	0	0	24.2424	1.38695
10	0	0	0	28.5714	1.22114
23	5	0.571429	0	40	0.94974
17	4	0.333333	0	31.4286	2.41355
7	4	0.333333	0	31.25	1.23644
4	0	0.631579	0	50	-0.22493
2	3	0.333333	15	31.0345	0.71039

## Sheet: PRI Result of model M1
No.	Chemical name	Score(MAE-LOO)	Score(Proximity Train YObs Mean)	Score(Similarity based AD)	CompositeScore	PredictionQuality	YPred(Test)	AD status	Closest Training Compound	Euclidean Distance	Generalized Jaccard Coeff.
240	Buminafos	1	2	3	2	Moderate	2.73252	In	31	0.272166	0.727273
262	Cadusafos	1	2	3	2	Moderate	2.73252	In	31	0.272166	0.727273
1325	Propetamphos	1	2	3	2	Moderate	2.64978	In	1	0.121766	0.888889
922	Hexylthiofos	1	3	3	3	Good	2.35744	In	31	0.30429	0.590909
1153	Mipafox	1	3	3	3	Good	2.35744	In	31	0.30429	0.590909
532	Dicrotophos	1	3	3	3	Good	2.2747	In	1	0	1
1119	Methocrotophos	1	3	3	3	Good	2.2747	In	1	0	1
1151	Mevinphos	1	3	3	3	Good	2.2747	In	1	0	1
1160	Monocrotophos	1	3	3	3	Good	2.2747	In	1	0	1
1269	Phosphamidon	1	3	3	3	Good	2.2747	In	1	0	1
126	Aspon	1	3	3	3	Good	2.23104	In	31	0.264497	0.636364
656	Ethion	1	3	3	3	Good	2.23104	In	31	0.264497	0.636364
862	Fosthiazate	1	3	3	3	Good	2.23104	In	31	0.264497	0.636364
976	IPSP	1	3	3	3	Good	2.23104	In	31	0.264497	0.636364
1475	Sulfotep	1	3	3	3	Good	2.23104	In	31	0.264497	0.636364
1513	Tetradifon	1	3	3	3	Good	2.23104	In	31	0.264497	0.636364
1514	Tetraethyl pyrophosphate	1	3	3	3	Good	2.23104	In	31	0.264497	0.636364
1089	Merphos	1	3	3	3	Good	2.10875	In	5	0.298142	0.272727
892	Glyphosine	1	3	3	3	Good	2.10465	In	31	0.226805	0.681818
353	Chlorphonium	1	3	3	3	Good	2.10056	In	31	0.0453609	0.954545
111	Amiton	1	3	3	3	Good	1.98235	In	5	0.286744	0.363636
316	Chlorethoxyfos	1	3	3	3	Good	1.98235	In	5	0.286744	0.363636
479	Demeton	1	3	3	3	Good	1.98235	In	5	0.286744	0.363636
606	Disulfoton	1	3	3	3	Good	1.98235	In	5	0.286744	0.363636
663	Ethoprophos	1	3	3	3	Good	1.98235	In	5	0.286744	0.363636
1106	Metepa	1	3	3	3	Good	1.98235	In	5	0.286744	0.363636
1116	Methiotepa	1	3	3	3	Good	1.98235	In	5	0.286744	0.363636
1587	Tribufos	1	3	3	3	Good	1.98235	In	5	0.286744	0.363636
688	Fenamiphos	1	3	3	3	Good	1.97416	In	31	0	1
973	Iprobenfos	1	3	3	3	Good	1.97416	In	31	0	1
1490	Tebupirimfos	1	3	3	3	Good	1.97416	In	31	0	1
221	Bromfenvinfos	1	3	3	3	Good	1.93279	In	31	0.369211	0.622951
326	Chlorfenvinphos	1	3	3	3	Good	1.93279	In	31	0.369211	0.622951
61	Acethion	1	3	3	3	Good	1.85596	In	5	0.282843	0.454545
63	Acetophos	1	3	3	3	Good	1.85596	In	5	0.282843	0.454545
607	Disulfoton sulfoxide	1	3	3	3	Good	1.85596	In	5	0.282843	0.454545
1285	Piperophos	1	3	3	3	Good	1.85596	In	5	0.282843	0.454545
1344	Prothoate	1	3	3	3	Good	1.85596	In	5	0.282843	0.454545
986	Isofenphos	1	3	3	3	Good	1.84777	In	31	0.0453609	0.956522
224	Bromocyclen	1	3	3	3	Good	1.77732	In	12	0	1
309	Chlorbicyclen	1	3	3	3	Good	1.77732	In	12	0	1
312	Chlordane	1	3	3	3	Good	1.77732	In	12	0	1
536	Dieldrin	1	3	3	3	Good	1.77732	In	12	0	1
628	Endrin	1	3	3	3	Good	1.77732	In	12	0	1
979	Isobenzan	1	3	3	3	Good	1.77732	In	12	0	1
1378	Pyridafenthion	1	3	3	3	Good	1.76503	In	1	0.309115	0.705882
112	Amiton oxalate	1	3	3	3	Good	1.72957	In	5	0.286744	0.416667
421	Cyanthoate	1	3	3	3	Good	1.72957	In	5	0.286744	0.416667
946	Imicyafos	1	3	3	3	Good	1.72957	In	5	0.286744	0.416667
1063	Mecarbam	1	3	3	3	Good	1.72957	In	5	0.286744	0.416667
164	Bensulide	1	3	3	3	Good	1.72138	In	31	0.0907218	0.916667
245	Butamifos	1	3	3	3	Good	1.72138	In	31	0.0907218	0.916667
18	1,3-butadiene	1	3	3	3	Good	1.65092	In	12	0.0362024	0.941176
90	Alpha-endosulfan	1	3	3	3	Good	1.65092	In	12	0.0362024	0.941176
191	Beta-endosulfan	1	3	3	3	Good	1.65092	In	12	0.0362024	0.941176
487	Di-1-p-menthene	1	3	3	3	Good	1.65092	In	12	0.0362024	0.941176
625	Endosulfan	1	3	3	3	Good	1.65092	In	12	0.0362024	0.941176
928	Hymexazol	1	3	3	3	Good	1.65092	In	12	0.0362024	0.941176
337	Chlormephos	1	3	3	3	Good	1.60727	In	5	0.149071	0.5
1261	Phorate	1	3	3	3	Good	1.60727	In	5	0.149071	0.5
1505	Terbufos	1	3	3	3	Good	1.60727	In	5	0.149071	0.5
228	Bromophos-ethyl	1	3	3	3	Good	1.59908	In	31	0.136083	0.863636
248	Butathiofos	1	3	3	3	Good	1.59908	In	31	0.136083	0.863636
367	Chlorthiophos	1	3	3	3	Good	1.59908	In	31	0.136083	0.863636
503	Dichlofenthion	1	3	3	3	Good	1.59908	In	31	0.136083	0.863636
540	Dietholate	1	3	3	3	Good	1.59908	In	31	0.136083	0.863636
644	Etaphos	1	3	3	3	Good	1.59908	In	31	0.136083	0.863636
913	Heterophos	1	3	3	3	Good	1.59908	In	31	0.136083	0.863636
1304	Profenofos	1	3	3	3	Good	1.59908	In	31	0.136083	0.863636
1321	Propaphos	1	3	3	3	Good	1.59908	In	31	0.136083	0.863636
1343	Prothiofos	1	3	3	3	Good	1.59908	In	31	0.136083	0.863636
1601	Trifenofos	1	3	3	3	Good	1.59908	In	31	0.136083	0.863636
83	Allidochlor	1	3	3	3	Good	1.52453	In	12	0.0724049	0.888889
87	Alorac	1	3	3	3	Good	1.52453	In	12	0.0724049	0.888889
217	Bromacil	1	3	3	3	Good	1.52453	In	12	0.0724049	0.888889
218	Bromacil-dimethylammonium	1	3	3	3	Good	1.52453	In	12	0.0724049	0.888889
255	Butopyronoxyl	1	3	3	3	Good	1.52453	In	12	0.0724049	0.888889
273	Captafol	1	3	3	3	Good	1.52453	In	12	0.0724049	0.888889
274	Captan	1	3	3	3	Good	1.52453	In	12	0.0724049	0.888889
369	Cholecalciferol	1	3	3	3	Good	1.52453	In	12	0.0724049	0.888889
400	Copper abietate	1	3	3	3	Good	1.52453	In	12	0.0724049	0.888889
506	Dichlormid	1	3	3	3	Good	1.52453	In	12	0.0724049	0.888889
866	Fumaric acid	1	3	3	3	Good	1.52453	In	12	0.0724049	0.888889
904	Haloxydine	1	3	3	3	Good	1.52453	In	12	0.0724049	0.888889
983	Isocil	1	3	3	3	Good	1.52453	In	12	0.0724049	0.888889
1039	Maleic hydrazide	1	3	3	3	Good	1.52453	In	12	0.0724049	0.888889
1502	Terbacil	1	3	3	3	Good	1.52453	In	12	0.0724049	0.888889
863	Fosthietan	1	3	3	3	Good	1.48088	In	5	0.141421	0.625
1085	Mephosfolan	1	3	3	3	Good	1.48088	In	5	0.141421	0.625
1233	Oxydeprofos	1	3	3	3	Good	1.48088	In	5	0.141421	0.625
1266	Phosfolan	1	3	3	3	Good	1.48088	In	5	0.141421	0.625
977	Isamidofos	1	3	3	3	Good	1.47269	In	31	0.143444	0.826087
987	Isofenphos-methyl	1	3	3	3	Good	1.47269	In	31	0.143444	0.826087
379	Clethodim	1	3	3	3	Good	1.39814	In	12	0.108607	0.842105
393	Cloproxydim	1	3	3	3	Good	1.39814	In	12	0.108607	0.842105
624	Empenthrin	1	3	3	3	Good	1.39814	In	12	0.108607	0.842105
1028	Lavandulyl senecioate	1	3	3	3	Good	1.39814	In	12	0.108607	0.842105
1174	N1,N2-diallyl-N2-dichloroacetylglycinamide	1	3	3	3	Good	1.39814	In	12	0.108607	0.842105
1500	Tepraloxydim	1	3	3	3	Good	1.39814	In	12	0.108607	0.842105
128	Athidathion	1	3	3	3	Good	1.35448	In	5	0.149071	0.555556
991	Isomalathion	1	3	3	3	Good	1.35448	In	5	0.149071	0.555556
1038	Malathion	1	3	3	3	Good	1.35448	In	5	0.149071	0.555556
1340	Prothidathion	1	3	3	3	Good	1.35448	In	5	0.149071	0.555556
109	Amiprofos-methyl	1	3	3	3	Good	1.34629	In	31	0.163551	0.791667
411	Coumithoate	1	3	3	3	Good	1.34629	In	31	0.163551	0.791667
609	Ditalimfos	1	3	3	3	Good	1.34629	In	31	0.163551	0.791667
1237	Parathion-ethyl	1	3	3	3	Good	1.34629	In	31	0.163551	0.791667
19	1,3-dichloropropene	1	3	3	3	Good	1.31721	In	12	0.271518	0.53125
24	1-methylcyclopropene	1	3	3	3	Good	1.31721	In	12	0.271518	0.53125
85	Allyl alcohol	1	3	3	3	Good	1.31721	In	12	0.271518	0.53125
1286	Piproctanyl	1	3	3	3	Good	1.31721	In	12	0.271518	0.53125
82	Allethrin	1	3	3	3	Good	1.27175	In	12	0.14481	0.8
84	Alloxydim	1	3	3	3	Good	1.27175	In	12	0.14481	0.8
198	Bioallethrin	1	3	3	3	Good	1.27175	In	12	0.14481	0.8
564	Dimethipin	1	3	3	3	Good	1.27175	In	12	0.14481	0.8
1422	S-bioallethrin	1	3	3	3	Good	1.27175	In	12	0.14481	0.8
120	Ampropylfos	1	3	3	3	Good	1.23218	In	5	0.0471405	0.8
477	Demephion	1	3	3	3	Good	1.23218	In	5	0.0471405	0.8
478	Demephion-O	1	3	3	3	Good	1.23218	In	5	0.0471405	0.8
480	Demeton-O-methyl	1	3	3	3	Good	1.23218	In	5	0.0471405	0.8
482	Demeton-S-methyl	1	3	3	3	Good	1.23218	In	5	0.0471405	0.8
1003	Isothioate	1	3	3	3	Good	1.23218	In	5	0.0471405	0.8
1177	Naled	1	3	3	3	Good	1.23218	In	5	0.0471405	0.8
1539	Thiometon	1	3	3	3	Good	1.23218	In	5	0.0471405	0.8
358	Chlorpyrifos	1	3	3	3	Good	1.224	In	31	0.272166	0.727273
494	Diazinon	1	3	3	3	Good	1.224	In	31	0.272166	0.727273
851	Fonofos	1	3	3	3	Good	1.224	In	31	0.272166	0.727273
1289	Pirimiphos-ethyl	1	3	3	3	Good	1.224	In	31	0.272166	0.727273
1540	Thionazin	1	3	3	3	Good	1.224	In	31	0.272166	0.727273
1591	Trichloronate	1	3	3	3	Good	1.224	In	31	0.272166	0.727273
621	Edifenphos	1	3	3	3	Good	1.21581	In	30	0.132453	0.892857
630	EPBP	1	3	3	3	Good	1.21581	In	30	0.132453	0.892857
1265	Phosdiphen	1	3	3	3	Good	1.21581	In	30	0.132453	0.892857
71	Acrolein	1	3	3	3	Good	1.19082	In	12	0.273921	0.5
72	Acrylonitrile	1	3	3	3	Good	1.19082	In	12	0.273921	0.5
490	Di-allate	1	3	3	3	Good	1.19082	In	12	0.273921	0.5
994	Isophorone	1	3	3	3	Good	1.19082	In	12	0.273921	0.5
1134	Methylisothiazoline	1	3	3	3	Good	1.19082	In	12	0.273921	0.5
1210	Octhilinone	1	3	3	3	Good	1.19082	In	12	0.273921	0.5
1469	Sulfallate	1	3	3	3	Good	1.19082	In	12	0.273921	0.5
1575	Tri-allate	1	3	3	3	Good	1.19082	In	12	0.273921	0.5
572	Dimethylvinphos	1	3	3	3	Good	1.18263	In	8	0.279372	0.72093
1511	Tetrachlorvinphos	1	3	3	3	Good	1.18263	In	8	0.279372	0.72093
1577	Triapenthenol	1	3	3	3	Good	1.14535	In	12	0.181012	0.761905
57	Acephate	1	3	3	3	Good	1.10579	In	5	0	1
98	Amidithion	1	3	3	3	Good	1.10579	In	5	0	1
254	Butonate	1	3	3	3	Good	1.10579	In	5	0	1
270	Calvinphos	1	3	3	3	Good	1.10579	In	5	0	1
463	DAEP	1	3	3	3	Good	1.10579	In	5	0	1
519	Dichlorvos	1	3	3	3	Good	1.10579	In	5	0	1
566	Dimethoate	1	3	3	3	Good	1.10579	In	5	0	1
660	Ethoate-methyl	1	3	3	3	Good	1.10579	In	5	0	1
858	Fosamine	1	3	3	3	Good	1.10579	In	5	0	1
859	Fosetyl	1	3	3	3	Good	1.10579	In	5	0	1
881	Glufosinate	1	3	3	3	Good	1.10579	In	5	0	1
882	Glufosinate-ammonium	1	3	3	3	Good	1.10579	In	5	0	1
887	Glyphosate	1	3	3	3	Good	1.10579	In	5	0	1
888	Glyphosate-dimethylammonium	1	3	3	3	Good	1.10579	In	5	0	1
889	Glyphosate-isopropylamine	1	3	3	3	Good	1.10579	In	5	0	1
890	Glyphosate-monoammonium	1	3	3	3	Good	1.10579	In	5	0	1
891	Glyphosate-trimesium	1	3	3	3	Good	1.10579	In	5	0	1
1131	Methylacetophos	1	3	3	3	Good	1.10579	In	5	0	1
1167	Morphothion	1	3	3	3	Good	1.10579	In	5	0	1
1213	Omethoate	1	3	3	3	Good	1.10579	In	5	0	1
1232	Oxydemeton-methyl	1	3	3	3	Good	1.10579	In	5	0	1
1627	Vamidothion	1	3	3	3	Good	1.10579	In	5	0	1
1262	Phosacetim	1	3	3	3	Good	1.08941	In	30	0.139618	0.862069
436	Cycloxydim	1	3	3	3	Good	1.06442	In	8	0.23281	0.677419
565	Dimethirimol	1	3	3	3	Good	1.06442	In	8	0.23281	0.677419
659	Ethirimol	1	3	3	3	Good	1.06442	In	8	0.23281	0.677419
1029	Lenacil	1	3	3	3	Good	1.06442	In	8	0.23281	0.677419
1293	Polyacrylamide	1	3	3	3	Good	1.06442	In	8	0.23281	0.677419
1430	Sethoxydim	1	3	3	3	Good	1.06442	In	8	0.23281	0.677419
1458	Spinetoram	1	3	3	3	Good	1.06442	In	8	0.23281	0.677419
9	1,1,1,2-tetrachloroethane	1	3	3	3	Good	0.983494	In	29	0	NaN
11	1,1,1-trichloroethane	1	3	3	3	Good	0.983494	In	29	0	NaN
13	1,1-dichloroethane	1	3	3	3	Good	0.983494	In	29	0	NaN
14	1,2,3-trichloropropane	1	3	3	3	Good	0.983494	In	29	0	NaN
16	1,2-dibromoethane	1	3	3	3	Good	0.983494	In	29	0	NaN
17	1,2-dichloropropane	1	3	3	3	Good	0.983494	In	29	0	NaN
22	1,4-dioxane	1	3	3	3	Good	0.983494	In	29	0	NaN
23	1-decanol	1	3	3	3	Good	0.983494	In	29	0	NaN
29	2-(octylthio)ethanol	1	3	3	3	Good	0.983494	In	29	0	NaN
45	2-aminobutane	1	3	3	3	Good	0.983494	In	29	0	NaN
46	2-butoxyethanol	1	3	3	3	Good	0.983494	In	29	0	NaN
47	2-hydrazinoethanol	1	3	3	3	Good	0.983494	In	29	0	NaN
48	2-methoxyethanol	1	3	3	3	Good	0.983494	In	29	0	NaN
49	2-methoxyethylmercury chloride	1	3	3	3	Good	0.983494	In	29	0	NaN
79	Aldimorph	1	3	3	3	Good	0.983494	In	29	0	NaN
88	Alpha-chlorohydrin	1	3	3	3	Good	0.983494	In	29	0	NaN
203	Bis(2-chloroethyl)ether	1	3	3	3	Good	0.983494	In	29	0	NaN
226	Bromomethane	1	3	3	3	Good	0.983494	In	29	0	NaN
246	Butan-1-ol	1	3	3	3	Good	0.983494	In	29	0	NaN
247	Butanethiol	1	3	3	3	Good	0.983494	In	29	0	NaN
272	Camphechlor	1	3	3	3	Good	0.983494	In	29	0	NaN
284	Carbon tetrachloride	1	3	3	3	Good	0.983494	In	29	0	NaN
293	Cetrimide	1	3	3	3	Good	0.983494	In	29	0	NaN
297	Chloral hydrate	1	3	3	3	Good	0.983494	In	29	0	NaN
298	Chloralose	1	3	3	3	Good	0.983494	In	29	0	NaN
338	Chlormequat	1	3	3	3	Good	0.983494	In	29	0	NaN
370	Choline chloride	1	3	3	3	Good	0.983494	In	29	0	NaN
405	Copper oxychloride	1	3	3	3	Good	0.983494	In	29	0	NaN
468	DCIP	1	3	3	3	Good	0.983494	In	29	0	NaN
495	Dibromochloropropane	1	3	3	3	Good	0.983494	In	29	0	NaN
535	Didecyldimethylammonium chloride	1	3	3	3	Good	0.983494	In	29	0	NaN
569	Dimethyl disulfide	1	3	3	3	Good	0.983494	In	29	0	NaN
598	Dipotassium phosphonate	1	3	3	3	Good	0.983494	In	29	0	NaN
615	Dodecylphenol ethoxylate	1	3	3	3	Good	0.983494	In	29	0	NaN
616	Dodemorph	1	3	3	3	Good	0.983494	In	29	0	NaN
631	Epichlorohydrin	1	3	3	3	Good	0.983494	In	29	0	NaN
642	Etacelasil	1	3	3	3	Good	0.983494	In	29	0	NaN
650	Ethanethiol	1	3	3	3	Good	0.983494	In	29	0	NaN
651	Ethanol	1	3	3	3	Good	0.983494	In	29	0	NaN
662	Ethohexadiol	1	3	3	3	Good	0.983494	In	29	0	NaN
673	Ethylene dichloride	1	3	3	3	Good	0.983494	In	29	0	NaN
674	Ethylene glycol	1	3	3	3	Good	0.983494	In	29	0	NaN
678	Ethylmercury bromide	1	3	3	3	Good	0.983494	In	29	0	NaN
880	Gliftor	1	3	3	3	Good	0.983494	In	29	0	NaN
884	Glycerin	1	3	3	3	Good	0.983494	In	29	0	NaN
921	Hexylene glycol	1	3	3	3	Good	0.983494	In	29	0	NaN
962	Iodomethane	1	3	3	3	Good	0.983494	In	29	0	NaN
1014	Izopamfos	1	3	3	3	Good	0.983494	In	29	0	NaN
1031	Lime sulphur	1	3	3	3	Good	0.983494	In	29	0	NaN
1033	Lindane	1	3	3	3	Good	0.983494	In	29	0	NaN
1086	Mepiquat	1	3	3	3	Good	0.983494	In	29	0	NaN
1096	Metaldehyde	1	3	3	3	Good	0.983494	In	29	0	NaN
1127	Methyl ether cellulose	1	3	3	3	Good	0.983494	In	29	0	NaN
1154	Mirex	1	3	3	3	Good	0.983494	In	29	0	NaN
1209	Octachlorodipropyl ether	1	3	3	3	Good	0.983494	In	29	0	NaN
1270	Phosphane	1	3	3	3	Good	0.983494	In	29	0	NaN
1334	Propylene glycol	1	3	3	3	Good	0.983494	In	29	0	NaN
1424	Seboctylamine	1	3	3	3	Good	0.983494	In	29	0	NaN
1446	Sodium hexafluorosilicate	1	3	3	3	Good	0.983494	In	29	0	NaN
1454	Sodium tetraborate pentahydrate	1	3	3	3	Good	0.983494	In	29	0	NaN
1456	Sorbitol	1	3	3	3	Good	0.983494	In	29	0	NaN
1464	Spiroxamine	1	3	3	3	Good	0.983494	In	29	0	NaN
1536	Thiocyclam oxalate	1	3	3	3	Good	0.983494	In	29	0	NaN
1549	Tiaojiean	1	3	3	3	Good	0.983494	In	29	0	NaN
1571	Triacontanol	1	3	3	3	Good	0.983494	In	29	0	NaN
1597	Tridemorph	1	3	3	3	Good	0.983494	In	29	0	NaN
1614	Triisopropanolamine	1	3	3	3	Good	0.983494	In	29	0	NaN
1617	Trioxymethylene	1	3	3	3	Good	0.983494	In	29	0	NaN
481	Demeton-O-methyl sulfone	1	3	3	3	Good	0.979399	In	5	0.0471405	0.833333
483	Demeton-S-methyl sulfone	1	3	3	3	Good	0.979399	In	5	0.0471405	0.833333
856	Formothion	1	3	3	3	Good	0.979399	In	5	0.0471405	0.833333
1065	Mecarphon	1	3	3	3	Good	0.979399	In	5	0.0471405	0.833333
1108	Methacrifos	1	3	3	3	Good	0.979399	In	5	0.0471405	0.833333
978	Isazofos	1	3	3	3	Good	0.975304	In	24	0.167836	0.692308
354	Chlorphoxim	1	3	3	3	Good	0.97121	In	30	0.220755	0.72
489	Dialifos	1	3	3	3	Good	0.97121	In	30	0.220755	0.72
1271	Phoxim	1	3	3	3	Good	0.97121	In	30	0.220755	0.72
1353	Pyraclofos	1	3	3	3	Good	0.967115	In	30	0.0441511	0.96
1409	Quinothion	1	3	3	3	Good	0.967115	In	30	0.0441511	0.96
632	EPN	1	3	3	3	Good	0.96302	In	30	0.159189	0.833333
1501	Terallethrin	1	3	3	3	Good	0.938031	In	8	0.186248	0.741935
1616	Trinexapac-ethyl	1	3	3	3	Good	0.938031	In	8	0.186248	0.741935
249	Butenachlor	1	3	3	3	Good	0.892567	In	12	0.253417	0.695652
288	Carboxin	1	3	3	3	Good	0.892567	In	12	0.253417	0.695652
415	Crotamiton	1	3	3	3	Good	0.892567	In	12	0.253417	0.695652
636	Epsilon-metofluthrin	1	3	3	3	Good	0.892567	In	12	0.253417	0.695652
824	Flupyradifurone	1	3	3	3	Good	0.892567	In	12	0.253417	0.695652
910	Heptafluthrin	1	3	3	3	Good	0.892567	In	12	0.253417	0.695652
1019	Kappa-tefluthrin	1	3	3	3	Good	0.892567	In	12	0.253417	0.695652
1138	Metofluthrin	1	3	3	3	Good	0.892567	In	12	0.253417	0.695652
1307	Profluthrin	1	3	3	3	Good	0.892567	In	12	0.253417	0.695652
1496	Tefluthrin	1	3	3	3	Good	0.892567	In	12	0.253417	0.695652
10	1,1,1-acetonitrile	1	3	3	3	Good	0.857101	In	29	0.0420703	0
28	1-octyl-2-pyrrolidone	1	3	3	3	Good	0.857101	In	29	0.0420703	0
43	24-epibrassinolide	1	3	3	3	Good	0.857101	In	29	0.0420703	0
56	ACC	1	3	3	3	Good	0.857101	In	29	0.0420703	0
59	Acetamide	1	3	3	3	Good	0.857101	In	29	0.0420703	0
74	AD-67	1	3	3	3	Good	0.857101	In	29	0.0420703	0
115	Ammonium acetate	1	3	3	3	Good	0.857101	In	29	0.0420703	0
116	Ammonium carbonate	1	3	3	3	Good	0.857101	In	29	0.0420703	0
119	Ammonium thiocyanate	1	3	3	3	Good	0.857101	In	29	0.0420703	0
145	Barium carbonate	1	3	3	3	Good	0.857101	In	29	0.0420703	0
260	Butyl stearate	1	3	3	3	Good	0.857101	In	29	0.0420703	0
261	Butylate	1	3	3	3	Good	0.857101	In	29	0.0420703	0
266	Calcium carbide	1	3	3	3	Good	0.857101	In	29	0.0420703	0
267	Calcium carbonate	1	3	3	3	Good	0.857101	In	29	0.0420703	0
269	Calcium phosphate	1	3	3	3	Good	0.857101	In	29	0.0420703	0
275	Carbamorph	1	3	3	3	Good	0.857101	In	29	0.0420703	0
313	Chlordecone	1	3	3	3	Good	0.857101	In	29	0.0420703	0
336	Chlorine dioxide	1	3	3	3	Good	0.857101	In	29	0.0420703	0
344	Chloropon	1	3	3	3	Good	0.857101	In	29	0.0420703	0
403	Copper II carbonate	1	3	3	3	Good	0.857101	In	29	0.0420703	0
404	Copper naphthenate	1	3	3	3	Good	0.857101	In	29	0.0420703	0
417	Cyanamide	1	3	3	3	Good	0.857101	In	29	0.0420703	0
428	Cycloate	1	3	3	3	Good	0.857101	In	29	0.0420703	0
429	Cyclohexanone	1	3	3	3	Good	0.857101	In	29	0.0420703	0
431	Cycloprate	1	3	3	3	Good	0.857101	In	29	0.0420703	0
437	Cycluron	1	3	3	3	Good	0.857101	In	29	0.0420703	0
465	Dalapon	1	3	3	3	Good	0.857101	In	29	0.0420703	0
467	Dazomet	1	3	3	3	Good	0.857101	In	29	0.0420703	0
493	Diammonium phosphate	1	3	3	3	Good	0.857101	In	29	0.0420703	0
530	Dicopper carbonate dihydroxide	1	3	3	3	Good	0.857101	In	29	0.0420703	0
556	Dimefox	1	3	3	3	Good	0.857101	In	29	0.0420703	0
604	Disodium phosphonate	1	3	3	3	Good	0.857101	In	29	0.0420703	0
617	Dodine	1	3	3	3	Good	0.857101	In	29	0.0420703	0
637	EPTC	1	3	3	3	Good	0.857101	In	29	0.0420703	0
652	Ethephon	1	3	3	3	Good	0.857101	In	29	0.0420703	0
655	Ethiolate	1	3	3	3	Good	0.857101	In	29	0.0420703	0
669	Ethyl butyl nitrosamine	1	3	3	3	Good	0.857101	In	29	0.0420703	0
670	Ethyl formate	1	3	3	3	Good	0.857101	In	29	0.0420703	0
675	Ethylene urea	1	3	3	3	Good	0.857101	In	29	0.0420703	0
743	Ferbam	1	3	3	3	Good	0.857101	In	29	0.0420703	0
745	Ferric phosphate	1	3	3	3	Good	0.857101	In	29	0.0420703	0
807	Fluoroacetamide	1	3	3	3	Good	0.857101	In	29	0.0420703	0
823	Flupropanate	1	3	3	3	Good	0.857101	In	29	0.0420703	0
854	Formaldehyde	1	3	3	3	Good	0.857101	In	29	0.0420703	0
886	Glyodin	1	3	3	3	Good	0.857101	In	29	0.0420703	0
914	Hexachloroacetone	1	3	3	3	Good	0.857101	In	29	0.0420703	0
918	Hexadecanoic acid	1	3	3	3	Good	0.857101	In	29	0.0420703	0
930	Icaridin	1	3	3	3	Good	0.857101	In	29	0.0420703	0
993	Isonoruron	1	3	3	3	Good	0.857101	In	29	0.0420703	0
995	Isopolinate	1	3	3	3	Good	0.857101	In	29	0.0420703	0
998	Isopropyl myristate	1	3	3	3	Good	0.857101	In	29	0.0420703	0
1032	Limestone	1	3	3	3	Good	0.857101	In	29	0.0420703	0
1097	Metam	1	3	3	3	Good	0.857101	In	29	0.0420703	0
1109	Methamidophos	1	3	3	3	Good	0.857101	In	29	0.0420703	0
1128	Methyl isobutyl ketone	1	3	3	3	Good	0.857101	In	29	0.0420703	0
1130	Methyl nonyl ketone	1	3	3	3	Good	0.857101	In	29	0.0420703	0
1157	Molinate	1	3	3	3	Good	0.857101	In	29	0.0420703	0
1173	N,N-dimethyl capramide	1	3	3	3	Good	0.857101	In	29	0.0420703	0
1197	N-methyl-2-pyrrolidone	1	3	3	3	Good	0.857101	In	29	0.0420703	0
1198	N-methylneodecanamide	1	3	3	3	Good	0.857101	In	29	0.0420703	0
1199	N-nitrosodimethylamine	1	3	3	3	Good	0.857101	In	29	0.0420703	0
1203	Noruron	1	3	3	3	Good	0.857101	In	29	0.0420703	0
1240	Pebulate	1	3	3	3	Good	0.857101	In	29	0.0420703	0
1254	Peroxyacetic acid	1	3	3	3	Good	0.857101	In	29	0.0420703	0
1319	Propamocarb	1	3	3	3	Good	0.857101	In	29	0.0420703	0
1329	Propionic acid	1	3	3	3	Good	0.857101	In	29	0.0420703	0
1341	Prothiocarb	1	3	3	3	Good	0.857101	In	29	0.0420703	0
1449	Sodium monochloroacetate	1	3	3	3	Good	0.857101	In	29	0.0420703	0
1450	Sodium monofluoroacetate	1	3	3	3	Good	0.857101	In	29	0.0420703	0
1455	Sodium tetrathiocarbonate	1	3	3	3	Good	0.857101	In	29	0.0420703	0
1465	Strobane	1	3	3	3	Good	0.857101	In	29	0.0420703	0
1484	TCA-ammonium	1	3	3	3	Good	0.857101	In	29	0.0420703	0
1545	Thiourea	1	3	3	3	Good	0.857101	In	29	0.0420703	0
1590	Trichlorfon	1	3	3	3	Good	0.857101	In	29	0.0420703	0
1625	Urea sulphate	1	3	3	3	Good	0.857101	In	29	0.0420703	0
1629	Vernolate	1	3	3	3	Good	0.857101	In	29	0.0420703	0
1631	Vinegar	1	3	3	3	Good	0.857101	In	29	0.0420703	0
1264	Phosametine	1	3	3	3	Good	0.853006	In	5	0.0942809	0.714286
227	Bromophos	1	3	3	3	Good	0.848911	In	24	0.159223	0.769231
285	Carbophenothion	1	3	3	3	Good	0.848911	In	24	0.159223	0.769231
491	Diamidaphos	1	3	3	3	Good	0.848911	In	24	0.159223	0.769231
593	Dioxabenzophos	1	3	3	3	Good	0.848911	In	24	0.159223	0.769231
697	Fenchlorphos	1	3	3	3	Good	0.848911	In	24	0.159223	0.769231
961	Iodofenphos	1	3	3	3	Good	0.848911	In	24	0.159223	0.769231
1015	Jiajizengxiaolin	1	3	3	3	Good	0.848911	In	24	0.159223	0.769231
1257	Phenkapton	1	3	3	3	Good	0.848911	In	24	0.159223	0.769231
1556	Tolclofos-methyl	1	3	3	3	Good	0.848911	In	24	0.159223	0.769231
1557	Tolfenpyrad	1	3	3	3	Good	0.848911	In	24	0.159223	0.769231
958	Inezin	1	3	3	3	Good	0.840722	In	30	0	1
1030	Leptophos	1	3	3	3	Good	0.840722	In	30	0	1
345	Chloroprallethrin	1	3	3	3	Good	0.811638	In	8	0.139686	0.806452
950	Imiprothrin	1	3	3	3	Good	0.811638	In	8	0.139686	0.806452
1295	Prallethrin	1	3	3	3	Good	0.811638	In	8	0.139686	0.806452
1300	Prochloraz	1	3	3	3	Good	0.811638	In	8	0.139686	0.806452
1515	Tetramethrin	1	3	3	3	Good	0.811638	In	8	0.139686	0.806452
86	Allyxycarb	1	3	3	3	Good	0.766174	In	12	0.289619	0.666667
233	Brompyrazon	1	3	3	3	Good	0.766174	In	12	0.289619	0.666667
333	Chloridazon	1	3	3	3	Good	0.766174	In	12	0.289619	0.666667
505	Dichlone	1	3	3	3	Good	0.766174	In	12	0.289619	0.666667
525	Diclomezine	1	3	3	3	Good	0.766174	In	12	0.289619	0.666667
574	Dimidazon	1	3	3	3	Good	0.766174	In	12	0.289619	0.666667
810	Fluoroimide	1	3	3	3	Good	0.766174	In	12	0.289619	0.666667
893	Griseofulvin	1	3	3	3	Good	0.766174	In	12	0.289619	0.666667
1201	Norflurazon	1	3	3	3	Good	0.766174	In	12	0.289619	0.666667
1376	Pyridaben	1	3	3	3	Good	0.766174	In	12	0.289619	0.666667
1406	Quinoclamine	1	3	3	3	Good	0.766174	In	12	0.289619	0.666667
31	2,2-dibromo-3-nitrilopropionamide	1	3	3	3	Good	0.730708	In	18	0	1
78	Aldicarb	1	3	3	3	Good	0.730708	In	18	0	1
92	Aluminium ammonium sulphate	1	3	3	3	Good	0.730708	In	18	0	1
117	Ammonium sulphamate	1	3	3	3	Good	0.730708	In	18	0	1
118	Ammonium sulphate	1	3	3	3	Good	0.730708	In	18	0	1
138	Azithiram	1	3	3	3	Good	0.730708	In	18	0	1
170	Bentonite	1	3	3	3	Good	0.730708	In	18	0	1
206	Bisthiosemi	1	3	3	3	Good	0.730708	In	18	0	1
207	Bis-trichloromethyl sulfone	1	3	3	3	Good	0.730708	In	18	0	1
236	Bronopol	1	3	3	3	Good	0.730708	In	18	0	1
253	Butocarboxim	1	3	3	3	Good	0.730708	In	18	0	1
265	Calcium acetate	1	3	3	3	Good	0.730708	In	18	0	1
268	Calcium cyanamide	1	3	3	3	Good	0.730708	In	18	0	1
282	Carbon dioxide	1	3	3	3	Good	0.730708	In	18	0	1
283	Carbon disulphide	1	3	3	3	Good	0.730708	In	18	0	1
292	Cartap	1	3	3	3	Good	0.730708	In	18	0	1
343	Chloropicrin	1	3	3	3	Good	0.730708	In	18	0	1
402	Copper II acetate	1	3	3	3	Good	0.730708	In	18	0	1
406	Copper sulphate	1	3	3	3	Good	0.730708	In	18	0	1
466	Daminozide	1	3	3	3	Good	0.730708	In	18	0	1
533	Dicyclonon	1	3	3	3	Good	0.730708	In	18	0	1
573	Dimexano	1	3	3	3	Good	0.730708	In	18	0	1
613	Dixanthogen	1	3	3	3	Good	0.730708	In	18	0	1
626	Endothal	1	3	3	3	Good	0.730708	In	18	0	1
645	Etem	1	3	3	3	Good	0.730708	In	18	0	1
649	Ethanedial	1	3	3	3	Good	0.730708	In	18	0	1
677	Ethylicin	1	3	3	3	Good	0.730708	In	18	0	1
883	Glutaraldehyde	1	3	3	3	Good	0.730708	In	18	0	1
885	Glyceryl distearate	1	3	3	3	Good	0.730708	In	18	0	1
895	Guazatine	1	3	3	3	Good	0.730708	In	18	0	1
896	Gypsum	1	3	3	3	Good	0.730708	In	18	0	1
912	Heptopargil	1	3	3	3	Good	0.730708	In	18	0	1
949	Iminoctadine triacetate	1	3	3	3	Good	0.730708	In	18	0	1
980	Isobornyl thiocyanoacetate	1	3	3	3	Good	0.730708	In	18	0	1
981	Isocarbamid	1	3	3	3	Good	0.730708	In	18	0	1
1021	Kelevan	1	3	3	3	Good	0.730708	In	18	0	1
1035	Lithium perfluorooctane sulfonate	1	3	3	3	Good	0.730708	In	18	0	1
1040	Malic acid	1	3	3	3	Good	0.730708	In	18	0	1
1120	Methomyl	1	3	3	3	Good	0.730708	In	18	0	1
1129	Methyl isothiocyanate	1	3	3	3	Good	0.730708	In	18	0	1
1133	Methylene bisthiocyanate	1	3	3	3	Good	0.730708	In	18	0	1
1185	Nickel bis(dimethyldithiocarbamate)	1	3	3	3	Good	0.730708	In	18	0	1
1312	Prohydrojasmon	1	3	3	3	Good	0.730708	In	18	0	1
1423	Schradan	1	3	3	3	Good	0.730708	In	18	0	1
1435	Silica	1	3	3	3	Good	0.730708	In	18	0	1
1453	Sodium silver thiosulphate	1	3	3	3	Good	0.730708	In	18	0	1
1471	Sulfluramid	1	3	3	3	Good	0.730708	In	18	0	1
1477	Sulfuryl fluoride	1	3	3	3	Good	0.730708	In	18	0	1
1479	Sulphuric acid	1	3	3	3	Good	0.730708	In	18	0	1
1485	TCA-ethadyl	1	3	3	3	Good	0.730708	In	18	0	1
1538	Thiofanox	1	3	3	3	Good	0.730708	In	18	0	1
1546	Thiram	1	3	3	3	Good	0.730708	In	18	0	1
1554	Tirpate	1	3	3	3	Good	0.730708	In	18	0	1
1555	Titanium dioxide	1	3	3	3	Good	0.730708	In	18	0	1
1613	Triforine	1	3	3	3	Good	0.730708	In	18	0	1
420	Cyanophos	1	3	3	3	Good	0.722519	In	24	0.167836	0.714286
982	Isocarbophos	1	3	3	3	Good	0.722519	In	24	0.167836	0.714286
1260	Phenthoate	1	3	3	3	Good	0.722519	In	24	0.167836	0.714286
1263	Phosalone	1	3	3	3	Good	0.722519	In	24	0.167836	0.714286
355	Chlorprazophos	1	3	3	3	Good	0.718424	In	30	0.159189	0.8
1176	Naftalofos	1	3	3	3	Good	0.714329	In	30	0.0441511	0.961538
619	Dufulin	1	3	3	3	Good	0.710234	In	30	0.220755	0.78125
730	Fenridazon	1	3	3	3	Good	0.639781	In	12	0.325822	0.64
731	Fenridazon-propyl	1	3	3	3	Good	0.639781	In	12	0.325822	0.64
820	Flupropacil	1	3	3	3	Good	0.639781	In	12	0.325822	0.64
1231	Oxycarboxin	1	3	3	3	Good	0.639781	In	12	0.325822	0.64
1408	Quinonamid	1	3	3	3	Good	0.639781	In	12	0.325822	0.64
94	Ametridione	1	3	3	3	Good	0.604315	In	34	0	1
96	Amibuzin	1	3	3	3	Good	0.604315	In	34	0	1
97	Amicarbazone	1	3	3	3	Good	0.604315	In	34	0	1
430	Cycloheximide	1	3	3	3	Good	0.604315	In	34	0	1
589	Dinotefuran	1	3	3	3	Good	0.604315	In	34	0	1
633	Epocholeone	1	3	3	3	Good	0.604315	In	34	0	1
657	Ethiozin	1	3	3	3	Good	0.604315	In	34	0	1
920	Hexazinone	1	3	3	3	Good	0.604315	In	34	0	1
999	Isoprothiolane	1	3	3	3	Good	0.604315	In	34	0	1
1037	Lythidathion	1	3	3	3	Good	0.604315	In	34	0	1
1046	Mazidox	1	3	3	3	Good	0.604315	In	34	0	1
1113	Methidathion	1	3	3	3	Good	0.604315	In	34	0	1
1146	Metribuzin	1	3	3	3	Good	0.604315	In	34	0	1
1190	Nithiazine	1	3	3	3	Good	0.604315	In	34	0	1
1193	Nitrilacarb	1	3	3	3	Good	0.604315	In	34	0	1
1222	Oxamyl	1	3	3	3	Good	0.604315	In	34	0	1
1348	Pydanon	1	3	3	3	Good	0.604315	In	34	0	1
135	Azinphos-ethyl	1	3	3	3	Good	0.596126	In	24	0.191363	0.666667
366	Chlorthion	1	3	3	3	Good	0.596126	In	24	0.191363	0.666667
704	Fenitrothion	1	3	3	3	Good	0.596126	In	24	0.191363	0.666667
1238	Parathion-methyl	1	3	3	3	Good	0.596126	In	24	0.191363	0.666667
1268	Phosnichlor	1	3	3	3	Good	0.596126	In	24	0.191363	0.666667
1013	Isoxathion	1	3	3	3	Good	0.592031	In	30	0.139618	0.84
1367	Pyrazophos	1	3	3	3	Good	0.592031	In	30	0.139618	0.84
1402	Quinalphos	1	3	3	3	Good	0.592031	In	30	0.139618	0.84
1411	Quintiofos	1	3	3	3	Good	0.583841	In	30	0.257443	0.757576
44	2-allyphenol	1	3	3	3	Good	0.558852	In	8	0.046562	0.935484
667	Ethoxyquin	1	3	3	3	Good	0.558852	In	8	0.046562	0.935484
1436	Silthiofam	1	3	3	3	Good	0.558852	In	8	0.046562	0.935484
372	Cinidon-ethyl	1	3	3	3	Good	0.513389	In	12	0.362024	0.615385
1223	Oxapyrazon	1	3	3	3	Good	0.513389	In	12	0.362024	0.615385
1548	Tiafenacil	1	3	3	3	Good	0.513389	In	12	0.362024	0.615385
80	Aldoxycarb	1	3	3	3	Good	0.477923	In	34	0.0451754	0.75
204	Bismerthiazol	1	3	3	3	Good	0.477923	In	34	0.0451754	0.75
256	Butoxycarboxim	1	3	3	3	Good	0.477923	In	34	0.0451754	0.75
447	Cymoxanil	1	3	3	3	Good	0.477923	In	34	0.0451754	0.75
676	Ethylenediamine tetraacetic acid	1	3	3	3	Good	0.477923	In	34	0.0451754	0.75
992	Isomethiozin	1	3	3	3	Good	0.477923	In	34	0.0451754	0.75
1017	Kaolin	1	3	3	3	Good	0.477923	In	34	0.0451754	0.75
1311	Prohexadione	1	3	3	3	Good	0.477923	In	34	0.0451754	0.75
1445	Sodium ferric EDTA	1	3	3	3	Good	0.477923	In	34	0.0451754	0.75
1535	Thiocyclam	1	3	3	3	Good	0.477923	In	34	0.0451754	0.75
1537	Thiodicarb	1	3	3	3	Good	0.477923	In	34	0.0451754	0.75
1544	Thiosultap	1	3	3	3	Good	0.477923	In	34	0.0451754	0.75
359	Chlorpyrifos-methyl	1	3	3	3	Good	0.473828	In	24	0	1
683	Etrimfos	1	3	3	3	Good	0.473828	In	24	0	1
861	Fospirate	1	3	3	3	Good	0.473828	In	24	0	1
1081	Menazon	1	3	3	3	Good	0.473828	In	24	0	1
1290	Pirimiphos-methyl	1	3	3	3	Good	0.473828	In	24	0	1
237	Brucine	1	3	3	3	Good	0.432459	In	8	0	1
555	Dimefluthrin	1	3	3	3	Good	0.432459	In	8	0	1
568	Dimethrin	1	3	3	3	Good	0.432459	In	8	0	1
700	Fenfluthrin	1	3	3	3	Good	0.432459	In	8	0	1
782	Fluensulfone	1	3	3	3	Good	0.432459	In	8	0	1
1083	Meperfluthrin	1	3	3	3	Good	0.432459	In	8	0	1
1255	Pethoxamid	1	3	3	3	Good	0.432459	In	8	0	1
1283	Piperonyl cyclonene	1	3	3	3	Good	0.432459	In	8	0	1
1352	Pyracarbolid	1	3	3	3	Good	0.432459	In	8	0	1
1416	Renofluthrin	1	3	3	3	Good	0.432459	In	8	0	1
1457	Spidoxamat	1	3	3	3	Good	0.432459	In	8	0	1
1568	Transfluthrin	1	3	3	3	Good	0.432459	In	8	0	1
578	Diniconazole	1	3	3	3	Good	0.386996	In	27	0.366484	0.696429
579	Diniconazole-M	1	3	3	3	Good	0.386996	In	27	0.366484	0.696429
582	Dinocap	1	3	3	3	Good	0.386996	In	27	0.366484	0.696429
1088	Meptyldinocap	1	3	3	3	Good	0.386996	In	27	0.366484	0.696429
1420	Saflufenacil	1	3	3	3	Good	0.386996	In	27	0.366484	0.696429
1624	Uniconazole	1	3	3	3	Good	0.386996	In	27	0.366484	0.696429
114	Amitrole	1	3	3	3	Good	0.35153	In	34	0.0903508	0.6
682	Etridiazole	1	3	3	3	Good	0.35153	In	34	0.0903508	0.6
868	Furalane	1	3	3	3	Good	0.35153	In	34	0.0903508	0.6
123	Anilofos	1	3	3	3	Good	0.347435	In	24	0.0530745	0.909091
378	Clacyfos	1	3	3	3	Good	0.347435	In	24	0.0530745	0.909091
193	Bicyclopyrone	1	3	3	3	Good	0.306066	In	8	0.046562	0.939394
435	Cycloxaprid	1	3	3	3	Good	0.306066	In	8	0.046562	0.939394
874	Furethrin	1	3	3	3	Good	0.306066	In	8	0.046562	0.939394
960	Iodobonil	1	3	3	3	Good	0.306066	In	8	0.046562	0.939394
1041	Malonoben	1	3	3	3	Good	0.306066	In	8	0.046562	0.939394
1158	Momfluorothrin	1	3	3	3	Good	0.306066	In	8	0.046562	0.939394
1251	Pentoxazone	1	3	3	3	Good	0.306066	In	8	0.046562	0.939394
1308	Profoxydim	1	3	3	3	Good	0.306066	In	8	0.046562	0.939394
1379	Pyridafol	1	3	3	3	Good	0.306066	In	8	0.046562	0.939394
1459	Spirobudifen	1	3	3	3	Good	0.306066	In	8	0.046562	0.939394
1460	Spirodiclofen	1	3	3	3	Good	0.306066	In	8	0.046562	0.939394
1461	Spiromesifen	1	3	3	3	Good	0.306066	In	8	0.046562	0.939394
1462	Spiropidion	1	3	3	3	Good	0.306066	In	8	0.046562	0.939394
1463	Spirotetramat	1	3	3	3	Good	0.306066	In	8	0.046562	0.939394
1563	Tralkoxydim	1	3	3	3	Good	0.306066	In	8	0.046562	0.939394
1605	Trifluenfuronate	1	3	3	3	Good	0.306066	In	8	0.046562	0.939394
1630	Vinclozolin	1	3	3	3	Good	0.306066	In	8	0.046562	0.939394
34	2,4,5-trichlorophenol	1	3	3	3	Good	0.225137	In	28	0.0489116	0.857143
40	2,4-dimethylphenol	1	3	3	3	Good	0.225137	In	28	0.0489116	0.857143
54	4-aminopyridine	1	3	3	3	Good	0.225137	In	28	0.0489116	0.857143
95	Ametryn	1	3	3	3	Good	0.225137	In	28	0.0489116	0.857143
129	Atraton	1	3	3	3	Good	0.225137	In	28	0.0489116	0.857143
130	Atrazine	1	3	3	3	Good	0.225137	In	28	0.0489116	0.857143
250	Buthidazole	1	3	3	3	Good	0.225137	In	28	0.0489116	0.857143
287	Carboxazole	1	3	3	3	Good	0.225137	In	28	0.0489116	0.857143
307	Chlorazine	1	3	3	3	Good	0.225137	In	28	0.0489116	0.857143
341	Chloroneb	1	3	3	3	Good	0.225137	In	28	0.0489116	0.857143
348	Chlorotoluene	1	3	3	3	Good	0.225137	In	28	0.0489116	0.857143
351	Chloroxylenol	1	3	3	3	Good	0.225137	In	28	0.0489116	0.857143
373	Cinmethylin	1	3	3	3	Good	0.225137	In	28	0.0489116	0.857143
414	Crimidine	1	3	3	3	Good	0.225137	In	28	0.0489116	0.857143
424	Cybutryne	1	3	3	3	Good	0.225137	In	28	0.0489116	0.857143
454	Cyprazine	1	3	3	3	Good	0.225137	In	28	0.0489116	0.857143
462	Cyromazine	1	3	3	3	Good	0.225137	In	28	0.0489116	0.857143
486	Desmetryn	1	3	3	3	Good	0.225137	In	28	0.0489116	0.857143
561	Dimethametryn	1	3	3	3	Good	0.225137	In	28	0.0489116	0.857143
562	Dimethenamid	1	3	3	3	Good	0.225137	In	28	0.0489116	0.857143
563	Dimethenamid-P	1	3	3	3	Good	0.225137	In	28	0.0489116	0.857143
600	Dipropetryn	1	3	3	3	Good	0.225137	In	28	0.0489116	0.857143
620	Ecolyst	1	3	3	3	Good	0.225137	In	28	0.0489116	0.857143
634	Epofenonane	1	3	3	3	Good	0.225137	In	28	0.0489116	0.857143
666	Ethoxylated p-nonylphenol	1	3	3	3	Good	0.225137	In	28	0.0489116	0.857143
724	Fenpropidin	1	3	3	3	Good	0.225137	In	28	0.0489116	0.857143
725	Fenpropimorph	1	3	3	3	Good	0.225137	In	28	0.0489116	0.857143
875	Furfural	1	3	3	3	Good	0.225137	In	28	0.0489116	0.857143
876	Furilazole	1	3	3	3	Good	0.225137	In	28	0.0489116	0.857143
877	Furmecyclox	1	3	3	3	Good	0.225137	In	28	0.0489116	0.857143
915	Hexachlorobenzene	1	3	3	3	Good	0.225137	In	28	0.0489116	0.857143
927	Hydroquinone	1	3	3	3	Good	0.225137	In	28	0.0489116	0.857143
968	Ipazine	1	3	3	3	Good	0.225137	In	28	0.0489116	0.857143
990	Isolan	1	3	3	3	Good	0.225137	In	28	0.0489116	0.857143
1005	Isouron	1	3	3	3	Good	0.225137	In	28	0.0489116	0.857143
1122	Methoprotryne	1	3	3	3	Good	0.225137	In	28	0.0489116	0.857143
1192	Nitrapyrin	1	3	3	3	Good	0.225137	In	28	0.0489116	0.857143
1202	Nornicotine	1	3	3	3	Good	0.225137	In	28	0.0489116	0.857143
1248	Pentachlorophenol	1	3	3	3	Good	0.225137	In	28	0.0489116	0.857143
1282	Piperonyl butoxide	1	3	3	3	Good	0.225137	In	28	0.0489116	0.857143
1287	Piprotal	1	3	3	3	Good	0.225137	In	28	0.0489116	0.857143
1292	P-nonylphenol	1	3	3	3	Good	0.225137	In	28	0.0489116	0.857143
1315	Prometon	1	3	3	3	Good	0.225137	In	28	0.0489116	0.857143
1316	Prometryn	1	3	3	3	Good	0.225137	In	28	0.0489116	0.857143
1324	Propazine	1	3	3	3	Good	0.225137	In	28	0.0489116	0.857143
1393	Pyripropanol	1	3	3	3	Good	0.225137	In	28	0.0489116	0.857143
1425	Sebuthylazine	1	3	3	3	Good	0.225137	In	28	0.0489116	0.857143
1426	Secbumeton	1	3	3	3	Good	0.225137	In	28	0.0489116	0.857143
1429	Sesamex	1	3	3	3	Good	0.225137	In	28	0.0489116	0.857143
1434	Silatrane	1	3	3	3	Good	0.225137	In	28	0.0489116	0.857143
1437	Simazine	1	3	3	3	Good	0.225137	In	28	0.0489116	0.857143
1439	Simeton	1	3	3	3	Good	0.225137	In	28	0.0489116	0.857143
1440	Simetryn	1	3	3	3	Good	0.225137	In	28	0.0489116	0.857143
1492	Tebuthiuron	1	3	3	3	Good	0.225137	In	28	0.0489116	0.857143
1506	Terbumeton	1	3	3	3	Good	0.225137	In	28	0.0489116	0.857143
1507	Terbuthylazine	1	3	3	3	Good	0.225137	In	28	0.0489116	0.857143
1508	Terbutryn	1	3	3	3	Good	0.225137	In	28	0.0489116	0.857143
1525	Thiazafluron	1	3	3	3	Good	0.225137	In	28	0.0489116	0.857143
1598	Tridiphane	1	3	3	3	Good	0.225137	In	28	0.0489116	0.857143
1599	Trietazine	1	3	3	3	Good	0.225137	In	28	0.0489116	0.857143
1635	Xylene	1	3	3	3	Good	0.225137	In	28	0.0489116	0.857143
1583	Triazophos	1	3	3	3	Good	0.216947	In	13	0.140334	0.857143
58	Acequinocyl	1	3	3	3	Good	0.179673	In	8	0.093124	0.885714
258	Butroxydim	1	3	3	3	Good	0.179673	In	8	0.093124	0.885714
385	Clofencet	1	3	3	3	Good	0.179673	In	8	0.093124	0.885714
461	Cypyrafluone	1	3	3	3	Good	0.179673	In	8	0.093124	0.885714
726	Fenpyrazamine	1	3	3	3	Good	0.179673	In	8	0.093124	0.885714
1299	Probenazole	1	3	3	3	Good	0.179673	In	8	0.093124	0.885714
196	Bifenthrin	1	3	3	3	Good	0.13421	In	27	0.366484	0.706897
544	Difenopenten	1	3	3	3	Good	0.13421	In	27	0.366484	0.706897
545	Difenopenten-ethyl	1	3	3	3	Good	0.13421	In	27	0.366484	0.706897
1018	Kappa-bifenthrin	1	3	3	3	Good	0.13421	In	27	0.366484	0.706897
1	(4-chlorophenoxy)acetic acid	1	3	3	3	Good	0.098744	In	28	0	1
15	1,2-benzisothiazolin-3-one	1	3	3	3	Good	0.098744	In	28	0	1
32	2,3,5-tri-iodobenzoic acid	1	3	3	3	Good	0.098744	In	28	0	1
33	2,3,6-TBA	1	3	3	3	Good	0.098744	In	28	0	1
35	2,4,5-trichlorophenoxyacetic acid	1	3	3	3	Good	0.098744	In	28	0	1
36	2,4-D	1	3	3	3	Good	0.098744	In	28	0	1
37	2,4-DB	1	3	3	3	Good	0.098744	In	28	0	1
38	2,4-D-dimethylammonium	1	3	3	3	Good	0.098744	In	28	0	1
41	2,5-dichlorobenzoic acid methyl ester	1	3	3	3	Good	0.098744	In	28	0	1
62	Acetochlor	1	3	3	3	Good	0.098744	In	28	0	1
76	Alachlor	1	3	3	3	Good	0.098744	In	28	0	1
103	Aminocarb	1	3	3	3	Good	0.098744	In	28	0	1
104	Aminocyclopyrachlor	1	3	3	3	Good	0.098744	In	28	0	1
105	Aminocyclopyrachlor-methyl	1	3	3	3	Good	0.098744	In	28	0	1
106	Aminopyralid	1	3	3	3	Good	0.098744	In	28	0	1
107	Aminopyralid-dimethylammonium	1	3	3	3	Good	0.098744	In	28	0	1
125	Aramite	1	3	3	3	Good	0.098744	In	28	0	1
154	Bendiocarb	1	3	3	3	Good	0.098744	In	28	0	1
160	Benoxacor	1	3	3	3	Good	0.098744	In	28	0	1
182	Benzoic acid	1	3	3	3	Good	0.098744	In	28	0	1
212	Bixlozone	1	3	3	3	Good	0.098744	In	28	0	1
223	Bromobutide	1	3	3	3	Good	0.098744	In	28	0	1
230	Bromoxynil	1	3	3	3	Good	0.098744	In	28	0	1
235	Bromuron	1	3	3	3	Good	0.098744	In	28	0	1
238	Bucarpolate	1	3	3	3	Good	0.098744	In	28	0	1
239	Bufencarb	1	3	3	3	Good	0.098744	In	28	0	1
243	Butachlor	1	3	3	3	Good	0.098744	In	28	0	1
276	Carbanolate	1	3	3	3	Good	0.098744	In	28	0	1
281	Carbofuran	1	3	3	3	Good	0.098744	In	28	0	1
286	Carbosulfan	1	3	3	3	Good	0.098744	In	28	0	1
291	Carpropamid	1	3	3	3	Good	0.098744	In	28	0	1
295	Chlobenthiazone	1	3	3	3	Good	0.098744	In	28	0	1
299	Chloramben	1	3	3	3	Good	0.098744	In	28	0	1
300	Chloramben-ammonium	1	3	3	3	Good	0.098744	In	28	0	1
301	Chloraniformethan	1	3	3	3	Good	0.098744	In	28	0	1
310	Chlorbromuron	1	3	3	3	Good	0.098744	In	28	0	1
314	Chlordimeform	1	3	3	3	Good	0.098744	In	28	0	1
317	Chloreturon	1	3	3	3	Good	0.098744	In	28	0	1
318	Chlorfenac	1	3	3	3	Good	0.098744	In	28	0	1
322	Chlorfenprop	1	3	3	3	Good	0.098744	In	28	0	1
323	Chlorfenprop-methyl	1	3	3	3	Good	0.098744	In	28	0	1
349	Chlorotoluron	1	3	3	3	Good	0.098744	In	28	0	1
352	Chloroxynil	1	3	3	3	Good	0.098744	In	28	0	1
357	Chlorpropham	1	3	3	3	Good	0.098744	In	28	0	1
365	Chlorthiamid	1	3	3	3	Good	0.098744	In	28	0	1
376	Cisanilide	1	3	3	3	Good	0.098744	In	28	0	1
381	Cliodinate	1	3	3	3	Good	0.098744	In	28	0	1
384	Cloethocarb	1	3	3	3	Good	0.098744	In	28	0	1
387	Clofibric acid	1	3	3	3	Good	0.098744	In	28	0	1
390	Clomazone	1	3	3	3	Good	0.098744	In	28	0	1
392	Cloprop	1	3	3	3	Good	0.098744	In	28	0	1
394	Clopyralid	1	3	3	3	Good	0.098744	In	28	0	1
395	Clopyralid-olamine	1	3	3	3	Good	0.098744	In	28	0	1
399	Cloxyfonac	1	3	3	3	Good	0.098744	In	28	0	1
418	Cyanatryn	1	3	3	3	Good	0.098744	In	28	0	1
419	Cyanazine	1	3	3	3	Good	0.098744	In	28	0	1
459	Cypromid	1	3	3	3	Good	0.098744	In	28	0	1
473	Defenuron	1	3	3	3	Good	0.098744	In	28	0	1
475	Delachlor	1	3	3	3	Good	0.098744	In	28	0	1
497	Dicamba	1	3	3	3	Good	0.098744	In	28	0	1
498	Dicamba diglycolamine	1	3	3	3	Good	0.098744	In	28	0	1
499	Dicamba diolamine	1	3	3	3	Good	0.098744	In	28	0	1
500	Dicamba methyl	1	3	3	3	Good	0.098744	In	28	0	1
501	Dichlobenil	1	3	3	3	Good	0.098744	In	28	0	1
508	Dichlorprop	1	3	3	3	Good	0.098744	In	28	0	1
509	Dichlorprop-butotyl	1	3	3	3	Good	0.098744	In	28	0	1
510	Dichlorprop-dimethylammonium	1	3	3	3	Good	0.098744	In	28	0	1
511	Dichlorprop-isoctyl	1	3	3	3	Good	0.098744	In	28	0	1
512	Dichlorprop-methyl	1	3	3	3	Good	0.098744	In	28	0	1
513	Dichlorprop-P	1	3	3	3	Good	0.098744	In	28	0	1
514	Dichlorprop-P-etexyl	1	3	3	3	Good	0.098744	In	28	0	1
515	Dichlorprop-isoctyl	1	3	3	3	Good	0.098744	In	28	0	1
516	Dichlorprop-methyl	1	3	3	3	Good	0.098744	In	28	0	1
517	Dichlorprop-P	1	3	3	3	Good	0.098744	In	28	0	1
518	Dichlorprop-P-etexyl	1	3	3	3	Good	0.098744	In	28	0	1
539	Diethofencarb	1	3	3	3	Good	0.098744	In	28	0	1
541	Diethyltoluamide	1	3	3	3	Good	0.098744	In	28	0	1
558	Dimepiperate	1	3	3	3	Good	0.098744	In	28	0	1
560	Dimethachlor	1	3	3	3	Good	0.098744	In	28	0	1
571	Dimethyl(4-piperidinocarbonyloxy-2,5-xylyl)sulfonium toluene-4-sulfonate	1	3	3	3	Good	0.098744	In	28	0	1
612	Diuron	1	3	3	3	Good	0.098744	In	28	0	1
622	Eglinazine	1	3	3	3	Good	0.098744	In	28	0	1
623	Eglinazine-ethyl	1	3	3	3	Good	0.098744	In	28	0	1
639	Erbon	1	3	3	3	Good	0.098744	In	28	0	1
641	Esprocarb	1	3	3	3	Good	0.098744	In	28	0	1
654	Ethiofencarb	1	3	3	3	Good	0.098744	In	28	0	1
699	Fenethacarb	1	3	3	3	Good	0.098744	In	28	0	1
702	Fenhexamid	1	3	3	3	Good	0.098744	In	28	0	1
706	Fenobucarb	1	3	3	3	Good	0.098744	In	28	0	1
707	Fenoprop	1	3	3	3	Good	0.098744	In	28	0	1
708	Fenoprop-butometyl	1	3	3	3	Good	0.098744	In	28	0	1
709	Fenoprop-butotyl	1	3	3	3	Good	0.098744	In	28	0	1
710	Fenoprop-butyl	1	3	3	3	Good	0.098744	In	28	0	1
711	Fenoprop-isoctyl	1	3	3	3	Good	0.098744	In	28	0	1
712	Fenoprop-methyl	1	3	3	3	Good	0.098744	In	28	0	1
713	Fenothiocarb	1	3	3	3	Good	0.098744	In	28	0	1
740	Fenuron	1	3	3	3	Good	0.098744	In	28	0	1
741	Fenuron-TCA	1	3	3	3	Good	0.098744	In	28	0	1
774	Fluchloraminopyr	1	3	3	3	Good	0.098744	In	28	0	1
775	Fluchloraminopyr-tefuryl	1	3	3	3	Good	0.098744	In	28	0	1
801	Fluometuron	1	3	3	3	Good	0.098744	In	28	0	1
813	Fluothiuron	1	3	3	3	Good	0.098744	In	28	0	1
818	Flupentiofenox	1	3	3	3	Good	0.098744	In	28	0	1
821	Flupropadine	1	3	3	3	Good	0.098744	In	28	0	1
822	Flupropadine hydrochloride	1	3	3	3	Good	0.098744	In	28	0	1
833	Flurochloridone	1	3	3	3	Good	0.098744	In	28	0	1
834	Fluroxypyr	1	3	3	3	Good	0.098744	In	28	0	1
835	Fluroxypyr-meptyl	1	3	3	3	Good	0.098744	In	28	0	1
848	Fluxofenim	1	3	3	3	Good	0.098744	In	28	0	1
929	Hyquincarb	1	3	3	3	Good	0.098744	In	28	0	1
966	Ioxynil	1	3	3	3	Good	0.098744	In	28	0	1
996	Isoprocarb	1	3	3	3	Good	0.098744	In	28	0	1
1000	Isoproturon	1	3	3	3	Good	0.098744	In	28	0	1
1034	Linuron	1	3	3	3	Good	0.098744	In	28	0	1
1047	MCPA	1	3	3	3	Good	0.098744	In	28	0	1
1048	MCPA-butotyl	1	3	3	3	Good	0.098744	In	28	0	1
1049	MCPA-butyl	1	3	3	3	Good	0.098744	In	28	0	1
1050	MCPA-dimethylammonium	1	3	3	3	Good	0.098744	In	28	0	1
1051	MCPA-diolamine	1	3	3	3	Good	0.098744	In	28	0	1
1052	MCPA-etexyl	1	3	3	3	Good	0.098744	In	28	0	1
1053	MCPA-ethyl	1	3	3	3	Good	0.098744	In	28	0	1
1054	MCPA-isobutyl	1	3	3	3	Good	0.098744	In	28	0	1
1055	MCPA-isoctyl	1	3	3	3	Good	0.098744	In	28	0	1
1056	MCPA-isopropyl	1	3	3	3	Good	0.098744	In	28	0	1
1057	MCPA-methyl	1	3	3	3	Good	0.098744	In	28	0	1
1058	MCPA-olamine	1	3	3	3	Good	0.098744	In	28	0	1
1059	MCPA-thioethyl	1	3	3	3	Good	0.098744	In	28	0	1
1060	MCPB	1	3	3	3	Good	0.098744	In	28	0	1
1061	M-cumenyl methylcarbamate	1	3	3	3	Good	0.098744	In	28	0	1
1066	Mecoprop	1	3	3	3	Good	0.098744	In	28	0	1
1067	Mecoprop dimethylammonium	1	3	3	3	Good	0.098744	In	28	0	1
1068	Mecoprop etexyl	1	3	3	3	Good	0.098744	In	28	0	1
1069	Mecoprop methyl	1	3	3	3	Good	0.098744	In	28	0	1
1070	Mecoprop trolamine	1	3	3	3	Good	0.098744	In	28	0	1
1071	Mecoprop-P etexyl	1	3	3	3	Good	0.098744	In	28	0	1
1072	Mecoprop-P isobutyl	1	3	3	3	Good	0.098744	In	28	0	1
1084	Mephenate	1	3	3	3	Good	0.098744	In	28	0	1
1114	Methiocarb	1	3	3	3	Good	0.098744	In	28	0	1
1118	Methiuron	1	3	3	3	Good	0.098744	In	28	0	1
1137	Metobromuron	1	3	3	3	Good	0.098744	In	28	0	1
1139	Metolachlor	1	3	3	3	Good	0.098744	In	28	0	1
1140	Metolcarb	1	3	3	3	Good	0.098744	In	28	0	1
1144	Metoxuron	1	3	3	3	Good	0.098744	In	28	0	1
1152	Mexacarbate	1	3	3	3	Good	0.098744	In	28	0	1
1159	Monalide	1	3	3	3	Good	0.098744	In	28	0	1
1161	Monolinuron	1	3	3	3	Good	0.098744	In	28	0	1
1164	Monuron	1	3	3	3	Good	0.098744	In	28	0	1
1184	Neburon	1	3	3	3	Good	0.098744	In	28	0	1
1214	Orbencarb	1	3	3	3	Good	0.098744	In	28	0	1
1235	Parafluron	1	3	3	3	Good	0.098744	In	28	0	1
1249	Pentanochlor	1	3	3	3	Good	0.098744	In	28	0	1
1272	Phthalide	1	3	3	3	Good	0.098744	In	28	0	1
1274	Picloram	1	3	3	3	Good	0.098744	In	28	0	1
1275	Picloram-isoctyl	1	3	3	3	Good	0.098744	In	28	0	1
1276	Picloram-methyl	1	3	3	3	Good	0.098744	In	28	0	1
1281	Piperalin	1	3	3	3	Good	0.098744	In	28	0	1
1284	Piperonyl sulfoxide	1	3	3	3	Good	0.098744	In	28	0	1
1288	Pirimicarb	1	3	3	3	Good	0.098744	In	28	0	1
1291	Plifenate	1	3	3	3	Good	0.098744	In	28	0	1
1301	Procyazine	1	3	3	3	Good	0.098744	In	28	0	1
1309	Proglinazine	1	3	3	3	Good	0.098744	In	28	0	1
1310	Proglinazine-ethyl	1	3	3	3	Good	0.098744	In	28	0	1
1314	Promecarb	1	3	3	3	Good	0.098744	In	28	0	1
1317	Propachlor	1	3	3	3	Good	0.098744	In	28	0	1
1320	Propanil	1	3	3	3	Good	0.098744	In	28	0	1
1326	Propham	1	3	3	3	Good	0.098744	In	28	0	1
1330	Propisochlor	1	3	3	3	Good	0.098744	In	28	0	1
1331	Propoxur	1	3	3	3	Good	0.098744	In	28	0	1
1338	Prosulfocarb	1	3	3	3	Good	0.098744	In	28	0	1
1358	Pyramat	1	3	3	3	Good	0.098744	In	28	0	1
1364	Pyrazachlor	1	3	3	3	Good	0.098744	In	28	0	1
1397	Pyroquilon	1	3	3	3	Good	0.098744	In	28	0	1
1428	Semiamitraz hydrochloride	1	3	3	3	Good	0.098744	In	28	0	1
1432	Siduron	1	3	3	3	Good	0.098744	In	28	0	1
1443	S-metolachlor	1	3	3	3	Good	0.098744	In	28	0	1
1482	Swep	1	3	3	3	Good	0.098744	In	28	0	1
1491	Tebutam	1	3	3	3	Good	0.098744	In	28	0	1
1503	Terbucarb	1	3	3	3	Good	0.098744	In	28	0	1
1504	Terbuchlor	1	3	3	3	Good	0.098744	In	28	0	1
1516	Tetramethylfluthrin	1	3	3	3	Good	0.098744	In	28	0	1
1551	Tiocarbazil	1	3	3	3	Good	0.098744	In	28	0	1
1567	Trans-flurochloridone	1	3	3	3	Good	0.098744	In	28	0	1
1581	Triazamate	1	3	3	3	Good	0.098744	In	28	0	1
1588	Tricamba	1	3	3	3	Good	0.098744	In	28	0	1
1589	Trichlamide	1	3	3	3	Good	0.098744	In	28	0	1
1592	Triclopyr	1	3	3	3	Good	0.098744	In	28	0	1
1593	Triclopyr-butotyl	1	3	3	3	Good	0.098744	In	28	0	1
1595	Triclopyr-triethylammonium	1	3	3	3	Good	0.098744	In	28	0	1
1615	Trimethacarb	1	3	3	3	Good	0.098744	In	28	0	1
1623	Umifoxolaner	1	3	3	3	Good	0.098744	In	28	0	1
1628	Verbutin	1	3	3	3	Good	0.098744	In	28	0	1
1633	XMC	1	3	3	3	Good	0.098744	In	28	0	1
1634	Xylachlor	1	3	3	3	Good	0.098744	In	28	0	1
1636	Xylylcarb	1	3	3	3	Good	0.098744	In	28	0	1
795	Flumetylsulforim	1	3	3	3	Good	0.0532806	In	27	0.0968719	0.902439
1022	Ketospiradox	1	3	3	3	Good	0.0532806	In	27	0.0968719	0.902439
1027	Lancotrione	1	3	3	3	Good	0.0532806	In	27	0.0968719	0.902439
1363	Pyrasulfotole	1	3	3	3	Good	0.0532806	In	27	0.0968719	0.902439
445	Cyhalothrin	1	3	3	3	Good	0.00781712	In	27	0.375964	0.683333
879	Gamma-cyhalothrin	1	3	3	3	Good	0.00781712	In	27	0.375964	0.683333
1026	Lambda-cyhalothrin	1	3	3	3	Good	0.00781712	In	27	0.375964	0.683333
60	Acetamiprid	1	3	3	3	Good	-0.0276489	In	15	0	1
99	Amidochlor	1	3	3	3	Good	-0.0276489	In	15	0	1
133	Azamethiphos	1	3	3	3	Good	-0.0276489	In	15	0	1
137	Aziprotryne	1	3	3	3	Good	-0.0276489	In	15	0	1
144	Barban	1	3	3	3	Good	-0.0276489	In	15	0	1
149	Benazolin	1	3	3	3	Good	-0.0276489	In	15	0	1
150	Benazolin-dimethylammonium	1	3	3	3	Good	-0.0276489	In	15	0	1
151	Benazolin-ethyl	1	3	3	3	Good	-0.0276489	In	15	0	1
156	Benfuracarb	1	3	3	3	Good	-0.0276489	In	15	0	1
157	Benfuresate	1	3	3	3	Good	-0.0276489	In	15	0	1
171	Benzadox	1	3	3	3	Good	-0.0276489	In	15	0	1
172	Benzadox ammonium	1	3	3	3	Good	-0.0276489	In	15	0	1
176	Benzamorf	1	3	3	3	Good	-0.0276489	In	15	0	1
181	Benzofluor	1	3	3	3	Good	-0.0276489	In	15	0	1
222	Bromobonil	1	3	3	3	Good	-0.0276489	In	15	0	1
231	Bromoxynil-butanoate	1	3	3	3	Good	-0.0276489	In	15	0	1
232	Bromoxynil-octanoate	1	3	3	3	Good	-0.0276489	In	15	0	1
241	Bupirimate	1	3	3	3	Good	-0.0276489	In	15	0	1
242	Buprofezin	1	3	3	3	Good	-0.0276489	In	15	0	1
252	Buthiuron	1	3	3	3	Good	-0.0276489	In	15	0	1
259	Buturon	1	3	3	3	Good	-0.0276489	In	15	0	1
280	Carbetamide	1	3	3	3	Good	-0.0276489	In	15	0	1
303	Chloranocryl	1	3	3	3	Good	-0.0276489	In	15	0	1
311	Chlorbufam	1	3	3	3	Good	-0.0276489	In	15	0	1
347	Chlorothalonil	1	3	3	3	Good	-0.0276489	In	15	0	1
356	Chlorprocarb	1	3	3	3	Good	-0.0276489	In	15	0	1
362	Chlorthal	1	3	3	3	Good	-0.0276489	In	15	0	1
363	Chlorthal-dimethyl	1	3	3	3	Good	-0.0276489	In	15	0	1
364	Chlorthal-monomethyl	1	3	3	3	Good	-0.0276489	In	15	0	1
375	Ciobutide	1	3	3	3	Good	-0.0276489	In	15	0	1
398	Clothianidin	1	3	3	3	Good	-0.0276489	In	15	0	1
425	Cyclanilide	1	3	3	3	Good	-0.0276489	In	15	0	1
446	Cymiazol	1	3	3	3	Good	-0.0276489	In	15	0	1
458	Cyprofuram	1	3	3	3	Good	-0.0276489	In	15	0	1
496	Dibutyl phthalate	1	3	3	3	Good	-0.0276489	In	15	0	1
504	Dichlofluanid	1	3	3	3	Good	-0.0276489	In	15	0	1
520	Dichlozoline	1	3	3	3	Good	-0.0276489	In	15	0	1
522	Diclocymet	1	3	3	3	Good	-0.0276489	In	15	0	1
526	Dicloran	1	3	3	3	Good	-0.0276489	In	15	0	1
538	Diethatyl ethyl	1	3	3	3	Good	-0.0276489	In	15	0	1
559	Dimetachlone	1	3	3	3	Good	-0.0276489	In	15	0	1
570	Dimethyl phthalate	1	3	3	3	Good	-0.0276489	In	15	0	1
605	Disul	1	3	3	3	Good	-0.0276489	In	15	0	1
608	Disul-sodium	1	3	3	3	Good	-0.0276489	In	15	0	1
611	Dithiopyr	1	3	3	3	Good	-0.0276489	In	15	0	1
653	Ethidimuron	1	3	3	3	Good	-0.0276489	In	15	0	1
661	Ethofumesate	1	3	3	3	Good	-0.0276489	In	15	0	1
714	Fenoxanil	1	3	3	3	Good	-0.0276489	In	15	0	1
755	Flonicamid	1	3	3	3	Good	-0.0276489	In	15	0	1
849	Folpet	1	3	3	3	Good	-0.0276489	In	15	0	1
855	Formetanate	1	3	3	3	Good	-0.0276489	In	15	0	1
857	Formparanate	1	3	3	3	Good	-0.0276489	In	15	0	1
860	Fosmethilan	1	3	3	3	Good	-0.0276489	In	15	0	1
872	Furathiocarb	1	3	3	3	Good	-0.0276489	In	15	0	1
923	Hexythiazox	1	3	3	3	Good	-0.0276489	In	15	0	1
948	Imidaclothiz	1	3	3	3	Good	-0.0276489	In	15	0	1
967	Ioxynil octanoate	1	3	3	3	Good	-0.0276489	In	15	0	1
975	Iprovalicarb	1	3	3	3	Good	-0.0276489	In	15	0	1
1020	Karbutilate	1	3	3	3	Good	-0.0276489	In	15	0	1
1094	Metalaxyl	1	3	3	3	Good	-0.0276489	In	15	0	1
1095	Metalaxyl-M	1	3	3	3	Good	-0.0276489	In	15	0	1
1111	Methazole	1	3	3	3	Good	-0.0276489	In	15	0	1
1143	Metoxadiazone	1	3	3	3	Good	-0.0276489	In	15	0	1
1165	Monuron-TCA	1	3	3	3	Good	-0.0276489	In	15	0	1
1171	Myclozolin	1	3	3	3	Good	-0.0276489	In	15	0	1
1172	N-(3-chloro-2,6-dimethylphenyl)-2-methoxy-N-(tetrahydr-2-oxo-3-furanyl)acetamide	1	3	3	3	Good	-0.0276489	In	15	0	1
1211	Ofurace	1	3	3	3	Good	-0.0276489	In	15	0	1
1218	Oxabetrinil	1	3	3	3	Good	-0.0276489	In	15	0	1
1220	Oxadiazon	1	3	3	3	Good	-0.0276489	In	15	0	1
1221	Oxadixyl	1	3	3	3	Good	-0.0276489	In	15	0	1
1302	Procymidone	1	3	3	3	Good	-0.0276489	In	15	0	1
1313	Promacyl	1	3	3	3	Good	-0.0276489	In	15	0	1
1323	Propargite	1	3	3	3	Good	-0.0276489	In	15	0	1
1333	Propyl isome	1	3	3	3	Good	-0.0276489	In	15	0	1
1336	Propyzamide	1	3	3	3	Good	-0.0276489	In	15	0	1
1337	Proquinazid	1	3	3	3	Good	-0.0276489	In	15	0	1
1342	Prothioconazole	1	3	3	3	Good	-0.0276489	In	15	0	1
1346	Proximpham	1	3	3	3	Good	-0.0276489	In	15	0	1
1347	Prynachlor	1	3	3	3	Good	-0.0276489	In	15	0	1
1398	Pyroxasulfone	1	3	3	3	Good	-0.0276489	In	15	0	1
1412	Quintozene	1	3	3	3	Good	-0.0276489	In	15	0	1
1444	Sodium 5-nitroguaiacolate	1	3	3	3	Good	-0.0276489	In	15	0	1
1451	Sodium o-nitrophenolate	1	3	3	3	Good	-0.0276489	In	15	0	1
1452	Sodium p-nitrophenolate	1	3	3	3	Good	-0.0276489	In	15	0	1
1494	Tecnazene	1	3	3	3	Good	-0.0276489	In	15	0	1
1509	Tetcyclacis	1	3	3	3	Good	-0.0276489	In	15	0	1
1522	Thiacloprid	1	3	3	3	Good	-0.0276489	In	15	0	1
1523	Thiamethoxam	1	3	3	3	Good	-0.0276489	In	15	0	1
1526	Thiazopyr	1	3	3	3	Good	-0.0276489	In	15	0	1
1527	Thicyofen	1	3	3	3	Good	-0.0276489	In	15	0	1
1558	Tolprocarb	1	3	3	3	Good	-0.0276489	In	15	0	1
1561	Tolylfluanid	1	3	3	3	Good	-0.0276489	In	15	0	1
1637	Zarilamid	1	3	3	3	Good	-0.0276489	In	15	0	1
1640	Zoxamide	1	3	3	3	Good	-0.0276489	In	15	0	1
141	Azothoate	1	3	3	3	Good	-0.0358385	In	13	0.046778	0.952381
197	Binapacryl	1	3	3	3	Good	-0.0731123	In	27	0.0484359	0.95122
931	Imazalil	1	3	3	3	Good	-0.0731123	In	27	0.0484359	0.95122
932	Imazalil nitrate	1	3	3	3	Good	-0.0731123	In	27	0.0484359	0.95122
1620	Triticonazole	1	3	3	3	Good	-0.0731123	In	27	0.0484359	0.95122
70	Acrinathrin	1	3	3	3	Good	-0.118576	In	27	0.391253	0.66129
177	Benzfendizone	1	3	3	3	Good	-0.118576	In	27	0.391253	0.66129
531	Dicoumarol	1	3	3	3	Good	-0.118576	In	27	0.391253	0.66129
629	Enoxastrobin	1	3	3	3	Good	-0.118576	In	27	0.391253	0.66129
638	Epyrifenacil	1	3	3	3	Good	-0.118576	In	27	0.391253	0.66129
687	Fenaminstrobin	1	3	3	3	Good	-0.118576	In	27	0.391253	0.66129
7	1-(4-chloro-1,3-dihydro-1,3-dioxo-2H-isoindole-2-yl)-cyclohexanecarboxamide	1	3	3	3	Good	-0.154042	In	15	0.0496904	0.888889
77	Alanycarb	1	3	3	3	Good	-0.154042	In	15	0.0496904	0.888889
100	Amidoflumet	1	3	3	3	Good	-0.154042	In	15	0.0496904	0.888889
127	Asulam	1	3	3	3	Good	-0.154042	In	15	0.0496904	0.888889
132	Azafenidin	1	3	3	3	Good	-0.154042	In	15	0.0496904	0.888889
136	Azinphos-methyl	1	3	3	3	Good	-0.154042	In	15	0.0496904	0.888889
167	Bentazone	1	3	3	3	Good	-0.154042	In	15	0.0496904	0.888889
174	Benzamacril	1	3	3	3	Good	-0.154042	In	15	0.0496904	0.888889
175	Benzamacril isobutyl	1	3	3	3	Good	-0.154042	In	15	0.0496904	0.888889
289	Carfentrazone	1	3	3	3	Good	-0.154042	In	15	0.0496904	0.888889
290	Carfentrazone-ethyl	1	3	3	3	Good	-0.154042	In	15	0.0496904	0.888889
368	Chlozolinate	1	3	3	3	Good	-0.154042	In	15	0.0496904	0.888889
448	Cyometrinil	1	3	3	3	Good	-0.154042	In	15	0.0496904	0.888889
557	Dimefuron	1	3	3	3	Good	-0.154042	In	15	0.0496904	0.888889
618	Drazoxolon	1	3	3	3	Good	-0.154042	In	15	0.0496904	0.888889
686	Fenaminosulf	1	3	3	3	Good	-0.154042	In	15	0.0496904	0.888889
718	Fenoxasulfone	1	3	3	3	Good	-0.154042	In	15	0.0496904	0.888889
739	Fentrazamide	1	3	3	3	Good	-0.154042	In	15	0.0496904	0.888889
806	Fluoridamid	1	3	3	3	Good	-0.154042	In	15	0.0496904	0.888889
840	Fluthiacet	1	3	3	3	Good	-0.154042	In	15	0.0496904	0.888889
841	Fluthiacet-methyl	1	3	3	3	Good	-0.154042	In	15	0.0496904	0.888889
934	Imazamethabenz	1	3	3	3	Good	-0.154042	In	15	0.0496904	0.888889
935	Imazamethabenz-methyl	1	3	3	3	Good	-0.154042	In	15	0.0496904	0.888889
936	Imazamox	1	3	3	3	Good	-0.154042	In	15	0.0496904	0.888889
937	Imazapic	1	3	3	3	Good	-0.154042	In	15	0.0496904	0.888889
938	Imazapic-ammonium	1	3	3	3	Good	-0.154042	In	15	0.0496904	0.888889
939	Imazapyr	1	3	3	3	Good	-0.154042	In	15	0.0496904	0.888889
942	Imazethapyr	1	3	3	3	Good	-0.154042	In	15	0.0496904	0.888889
943	Imazethapyr ammonium	1	3	3	3	Good	-0.154042	In	15	0.0496904	0.888889
947	Imidacloprid	1	3	3	3	Good	-0.154042	In	15	0.0496904	0.888889
974	Iprodione	1	3	3	3	Good	-0.154042	In	15	0.0496904	0.888889
1006	Isoval	1	3	3	3	Good	-0.154042	In	15	0.0496904	0.888889
1077	Mefenpyr	1	3	3	3	Good	-0.154042	In	15	0.0496904	0.888889
1078	Mefenpyr diethyl	1	3	3	3	Good	-0.154042	In	15	0.0496904	0.888889
1080	Mefluidide	1	3	3	3	Good	-0.154042	In	15	0.0496904	0.888889
1099	Metamitron	1	3	3	3	Good	-0.154042	In	15	0.0496904	0.888889
1103	Metazoxolon	1	3	3	3	Good	-0.154042	In	15	0.0496904	0.888889
1110	Methasulfocarb	1	3	3	3	Good	-0.154042	In	15	0.0496904	0.888889
1189	Nitenpyram	1	3	3	3	Good	-0.154042	In	15	0.0496904	0.888889
1196	N-methyl saccharine	1	3	3	3	Good	-0.154042	In	15	0.0496904	0.888889
1219	Oxadiargyl	1	3	3	3	Good	-0.154042	In	15	0.0496904	0.888889
1228	Oxolinic acid	1	3	3	3	Good	-0.154042	In	15	0.0496904	0.888889
1267	Phosmet	1	3	3	3	Good	-0.154042	In	15	0.0496904	0.888889
1279	Pindone	1	3	3	3	Good	-0.154042	In	15	0.0496904	0.888889
1280	Pinoxaden	1	3	3	3	Good	-0.154042	In	15	0.0496904	0.888889
1351	Pymetrozine	1	3	3	3	Good	-0.154042	In	15	0.0496904	0.888889
1476	Sulfoxaflor	1	3	3	3	Good	-0.154042	In	15	0.0496904	0.888889
1626	Valifenalate	1	3	3	3	Good	-0.154042	In	15	0.0496904	0.888889
1576	Triamiphos	1	3	3	3	Good	-0.158137	In	11	0.155334	0.8
39	2,4-DEP	1	3	3	3	Good	-0.166326	In	13	0.198462	0.777778
200	Bioresmethrin	1	3	3	3	Good	-0.199505	In	27	0	1
897	Halacrinate	1	3	3	3	Good	-0.199505	In	27	0	1
1241	Pefurazoate	1	3	3	3	Good	-0.199505	In	27	0	1
1380	Pyridalyl	1	3	3	3	Good	-0.199505	In	27	0	1
1417	Resmethrin	1	3	3	3	Good	-0.199505	In	27	0	1
20	1,3-dinitrobenzene	1	3	3	3	Good	-0.280435	In	21	0.0514344	0.909091
93	Ametoctradin	1	3	3	3	Good	-0.280435	In	21	0.0514344	0.909091
153	Benclothiaz	1	3	3	3	Good	-0.280435	In	21	0.0514344	0.909091
155	Benfluralin	1	3	3	3	Good	-0.280435	In	21	0.0514344	0.909091
257	Butralin	1	3	3	3	Good	-0.280435	In	21	0.0514344	0.909091
278	Carbasulam	1	3	3	3	Good	-0.280435	In	21	0.0514344	0.909091
327	Chlorfluazole	1	3	3	3	Good	-0.280435	In	21	0.0514344	0.909091
576	Dinex	1	3	3	3	Good	-0.280435	In	21	0.0514344	0.909091
577	Dinex-diclexine	1	3	3	3	Good	-0.280435	In	21	0.0514344	0.909091
580	Dinitramine	1	3	3	3	Good	-0.280435	In	21	0.0514344	0.909091
586	Dinosam	1	3	3	3	Good	-0.280435	In	21	0.0514344	0.909091
590	Dinoterb	1	3	3	3	Good	-0.280435	In	21	0.0514344	0.909091
599	Dipropalin	1	3	3	3	Good	-0.280435	In	21	0.0514344	0.909091
614	DNOC	1	3	3	3	Good	-0.280435	In	21	0.0514344	0.909091
679	Etinofen	1	3	3	3	Good	-0.280435	In	21	0.0514344	0.909091
703	Fenitropan	1	3	3	3	Good	-0.280435	In	21	0.0514344	0.909091
773	Fluchloralin	1	3	3	3	Good	-0.280435	In	21	0.0514344	0.909091
789	Flufenpyr	1	3	3	3	Good	-0.280435	In	21	0.0514344	0.909091
790	Flufenpyr-ethyl	1	3	3	3	Good	-0.280435	In	21	0.0514344	0.909091
796	Flumiclorac	1	3	3	3	Good	-0.280435	In	21	0.0514344	0.909091
797	Flumiclorac-pentyl	1	3	3	3	Good	-0.280435	In	21	0.0514344	0.909091
799	Flumipropyn	1	3	3	3	Good	-0.280435	In	21	0.0514344	0.909091
811	Fluoromidine	1	3	3	3	Good	-0.280435	In	21	0.0514344	0.909091
894	Guadipyr	1	3	3	3	Good	-0.280435	In	21	0.0514344	0.909091
997	Isopropalin	1	3	3	3	Good	-0.280435	In	21	0.0514344	0.909091
1074	Medinoterb	1	3	3	3	Good	-0.280435	In	21	0.0514344	0.909091
1195	Nitrothal-isopropyl	1	3	3	3	Good	-0.280435	In	21	0.0514344	0.909091
1244	Pendimethalin	1	3	3	3	Good	-0.280435	In	21	0.0514344	0.909091
1303	Prodiamine	1	3	3	3	Good	-0.280435	In	21	0.0514344	0.909091
1305	Profluazol	1	3	3	3	Good	-0.280435	In	21	0.0514344	0.909091
1306	Profluralin	1	3	3	3	Good	-0.280435	In	21	0.0514344	0.909091
1421	Saisentong	1	3	3	3	Good	-0.280435	In	21	0.0514344	0.909091
1470	Sulfentrazone	1	3	3	3	Good	-0.280435	In	21	0.0514344	0.909091
1528	Thidiazimin	1	3	3	3	Good	-0.280435	In	21	0.0514344	0.909091
1560	Toluene 2,4-diisocyanate	1	3	3	3	Good	-0.280435	In	21	0.0514344	0.909091
1609	Trifluralin	1	3	3	3	Good	-0.280435	In	21	0.0514344	0.909091
199	Biopermethrin	1	3	3	3	Good	-0.325898	In	27	0.0484359	0.953488
377	Cis-permethrin	1	3	3	3	Good	-0.325898	In	27	0.0484359	0.953488
408	Coumafuryl	1	3	3	3	Good	-0.325898	In	27	0.0484359	0.953488
409	Coumatetralyl	1	3	3	3	Good	-0.325898	In	27	0.0484359	0.953488
438	Cyenopyrafen	1	3	3	3	Good	-0.325898	In	27	0.0484359	0.953488
567	Dimethomorph	1	3	3	3	Good	-0.325898	In	27	0.0484359	0.953488
800	Flumorph	1	3	3	3	Good	-0.325898	In	27	0.0484359	0.953488
842	Flutianil	1	3	3	3	Good	-0.325898	In	27	0.0484359	0.953488
933	Imazalil sulfate	1	3	3	3	Good	-0.325898	In	27	0.0484359	0.953488
1016	Kadethrin	1	3	3	3	Good	-0.325898	In	27	0.0484359	0.953488
1225	Oxaziclomefone	1	3	3	3	Good	-0.325898	In	27	0.0484359	0.953488
1253	Permethrin	1	3	3	3	Good	-0.325898	In	27	0.0484359	0.953488
1259	Phenothrin	1	3	3	3	Good	-0.325898	In	27	0.0484359	0.953488
1360	Pyranocoumarin	1	3	3	3	Good	-0.325898	In	27	0.0484359	0.953488
1391	Pyrimorph	1	3	3	3	Good	-0.325898	In	27	0.0484359	0.953488
1481	Sumithrin	1	3	3	3	Good	-0.325898	In	27	0.0484359	0.953488
1569	Transpermethrin	1	3	3	3	Good	-0.325898	In	27	0.0484359	0.953488
5	(R)-hexaconazole	1	3	3	3	Good	-0.406827	In	21	0	1
21	1,4-dimethylnaphthalene	1	3	3	3	Good	-0.406827	In	21	0	1
25	1-methylnaphthalene	1	3	3	3	Good	-0.406827	In	21	0	1
30	2-(thiocyanomethylthio)benzothiazole	1	3	3	3	Good	-0.406827	In	21	0	1
50	2-methyl naphthalene	1	3	3	3	Good	-0.406827	In	21	0	1
55	8-hydroxyquinoline	1	3	3	3	Good	-0.406827	In	21	0	1
65	Acibenzolar	1	3	3	3	Good	-0.406827	In	21	0	1
66	Acibenzolar-S-methyl	1	3	3	3	Good	-0.406827	In	21	0	1
101	Amidosulfuron	1	3	3	3	Good	-0.406827	In	21	0	1
131	Azaconazole	1	3	3	3	Good	-0.406827	In	21	0	1
152	Bencarbazone	1	3	3	3	Good	-0.406827	In	21	0	1
166	Bentaluron	1	3	3	3	Good	-0.406827	In	21	0	1
187	Benzthiazuron	1	3	3	3	Good	-0.406827	In	21	0	1
234	Bromuconazole	1	3	3	3	Good	-0.406827	In	21	0	1
279	Carbendazim	1	3	3	3	Good	-0.406827	In	21	0	1
360	Chlorquinox	1	3	3	3	Good	-0.406827	In	21	0	1
455	Cyproconazole	1	3	3	3	Good	-0.406827	In	21	0	1
471	Debacarb	1	3	3	3	Good	-0.406827	In	21	0	1
581	Dinobuton	1	3	3	3	Good	-0.406827	In	21	0	1
583	Dinocton	1	3	3	3	Good	-0.406827	In	21	0	1
585	Dinopenton	1	3	3	3	Good	-0.406827	In	21	0	1
587	Dinoseb acetate	1	3	3	3	Good	-0.406827	In	21	0	1
588	Dinosulfon	1	3	3	3	Good	-0.406827	In	21	0	1
591	Dinoterb acetate	1	3	3	3	Good	-0.406827	In	21	0	1
643	Etaconazole	1	3	3	3	Good	-0.406827	In	21	0	1
647	Ethalfluralin	1	3	3	3	Good	-0.406827	In	21	0	1
671	Ethylchlozate	1	3	3	3	Good	-0.406827	In	21	0	1
771	Flucarbazone	1	3	3	3	Good	-0.406827	In	21	0	1
798	Flumioxazin	1	3	3	3	Good	-0.406827	In	21	0	1
873	Furconazole	1	3	3	3	Good	-0.406827	In	21	0	1
917	Hexaconazole	1	3	3	3	Good	-0.406827	In	21	0	1
924	Huanjunzuo	1	3	3	3	Good	-0.406827	In	21	0	1
969	Ipconazole	1	3	3	3	Good	-0.406827	In	21	0	1
1073	Medetomidine	1	3	3	3	Good	-0.406827	In	21	0	1
1075	Medinoterb acetate	1	3	3	3	Good	-0.406827	In	21	0	1
1105	Metconazole	1	3	3	3	Good	-0.406827	In	21	0	1
1107	Methabenzthiazuron	1	3	3	3	Good	-0.406827	In	21	0	1
1178	Nanosilver-silica composite	1	3	3	3	Good	-0.406827	In	21	0	1
1179	Naphthalene	1	3	3	3	Good	-0.406827	In	21	0	1
1216	Orysastrobin	1	3	3	3	Good	-0.406827	In	21	0	1
1227	Oxine-copper	1	3	3	3	Good	-0.406827	In	21	0	1
1242	Penconazole	1	3	3	3	Good	-0.406827	In	21	0	1
1250	Penthiopyrad	1	3	3	3	Good	-0.406827	In	21	0	1
1327	Propiconazole	1	3	3	3	Good	-0.406827	In	21	0	1
1438	Simeconazole	1	3	3	3	Good	-0.406827	In	21	0	1
1468	Sulcotrione	1	3	3	3	Good	-0.406827	In	21	0	1
1486	Tebuconazole	1	3	3	3	Good	-0.406827	In	21	0	1
1497	Tefuryltrione	1	3	3	3	Good	-0.406827	In	21	0	1
1498	Tembotrione	1	3	3	3	Good	-0.406827	In	21	0	1
1512	Tetraconazole	1	3	3	3	Good	-0.406827	In	21	0	1
1530	Thiencarbazone	1	3	3	3	Good	-0.406827	In	21	0	1
1531	Thiencarbazone-methyl	1	3	3	3	Good	-0.406827	In	21	0	1
1570	Trans-propiconazole	1	3	3	3	Good	-0.406827	In	21	0	1
1573	Triadimenol	1	3	3	3	Good	-0.406827	In	21	0	1
1604	Trifludimoxazin	1	3	3	3	Good	-0.406827	In	21	0	1
89	Alpha-cypermethrin	1	3	3	3	Good	-0.452291	In	27	0.0968719	0.911111
189	Beta-cyfluthrin	1	3	3	3	Good	-0.452291	In	27	0.0968719	0.911111
190	Beta-cypermethrin	1	3	3	3	Good	-0.452291	In	27	0.0968719	0.911111
407	Coumachlor	1	3	3	3	Good	-0.452291	In	27	0.0968719	0.911111
441	Cyfluthrin	1	3	3	3	Good	-0.452291	In	27	0.0968719	0.911111
450	Cypermethrin	1	3	3	3	Good	-0.452291	In	27	0.0968719	0.911111
453	Cyphenothrin	1	3	3	3	Good	-0.452291	In	27	0.0968719	0.911111
476	Deltamethrin	1	3	3	3	Good	-0.452291	In	27	0.0968719	0.911111
722	Fenpirithrin	1	3	3	3	Good	-0.452291	In	27	0.0968719	0.911111
1520	Theta-cypermethrin	1	3	3	3	Good	-0.452291	In	27	0.0968719	0.911111
1632	Warfarin	1	3	3	3	Good	-0.452291	In	27	0.0968719	0.911111
1638	Zeta-cypermethrin	1	3	3	3	Good	-0.452291	In	27	0.0968719	0.911111
12	1,1-bis(4-chlorophenyl)-2-ethoxyethanol	1	3	3	3	Good	-0.53322	In	11	0	1
26	1-naphthylacetamide	1	3	3	3	Good	-0.53322	In	11	0	1
27	1-naphthylacetic acid	1	3	3	3	Good	-0.53322	In	11	0	1
51	2-naphthyloxyacetic acid	1	3	3	3	Good	-0.53322	In	11	0	1
52	2-phenylphenol	1	3	3	3	Good	-0.53322	In	11	0	1
53	4,4-methylenedianiline	1	3	3	3	Good	-0.53322	In	11	0	1
73	Acynonapyr	1	3	3	3	Good	-0.53322	In	11	0	1
91	Alpha-naphthylthiourea	1	3	3	3	Good	-0.53322	In	11	0	1
121	Ancymidol	1	3	3	3	Good	-0.53322	In	11	0	1
122	Anilazine	1	3	3	3	Good	-0.53322	In	11	0	1
140	Azoluron	1	3	3	3	Good	-0.53322	In	11	0	1
159	Benomyl	1	3	3	3	Good	-0.53322	In	11	0	1
168	Benthiavalicarb	1	3	3	3	Good	-0.53322	In	11	0	1
169	Benthiavalicarb-isopropyl	1	3	3	3	Good	-0.53322	In	11	0	1
173	Benzalkonium chloride	1	3	3	3	Good	-0.53322	In	11	0	1
192	Bethoxazin	1	3	3	3	Good	-0.53322	In	11	0	1
201	Biphenyl	1	3	3	3	Good	-0.53322	In	11	0	1
210	Bithionol	1	3	3	3	Good	-0.53322	In	11	0	1
277	Carbaryl	1	3	3	3	Good	-0.53322	In	11	0	1
294	Chinomethionat	1	3	3	3	Good	-0.53322	In	11	0	1
308	Chlorbenside	1	3	3	3	Good	-0.53322	In	11	0	1
319	Chlorfenapyr	1	3	3	3	Good	-0.53322	In	11	0	1
321	Chlorfenethol	1	3	3	3	Good	-0.53322	In	11	0	1
380	Climbazole	1	3	3	3	Good	-0.53322	In	11	0	1
396	Cloquintocet-mexyl	1	3	3	3	Good	-0.53322	In	11	0	1
413	Credazine	1	3	3	3	Good	-0.53322	In	11	0	1
451	Cyperquat	1	3	3	3	Good	-0.53322	In	11	0	1
452	Cyperquat iodide	1	3	3	3	Good	-0.53322	In	11	0	1
456	Cyprodinil	1	3	3	3	Good	-0.53322	In	11	0	1
469	DDD	1	3	3	3	Good	-0.53322	In	11	0	1
470	DDT	1	3	3	3	Good	-0.53322	In	11	0	1
507	Dichlorophen	1	3	3	3	Good	-0.53322	In	11	0	1
529	Dicofol	1	3	3	3	Good	-0.53322	In	11	0	1
554	Diflumetorim	1	3	3	3	Good	-0.53322	In	11	0	1
592	Diofenolan	1	3	3	3	Good	-0.53322	In	11	0	1
597	Diphenylamine	1	3	3	3	Good	-0.53322	In	11	0	1
602	Dipyrithione	1	3	3	3	Good	-0.53322	In	11	0	1
603	Diquat	1	3	3	3	Good	-0.53322	In	11	0	1
646	Ethaboxam	1	3	3	3	Good	-0.53322	In	11	0	1
672	Ethyl-DDD	1	3	3	3	Good	-0.53322	In	11	0	1
689	Fenapanil	1	3	3	3	Good	-0.53322	In	11	0	1
695	Fenchlorazole	1	3	3	3	Good	-0.53322	In	11	0	1
698	Fenclorim	1	3	3	3	Good	-0.53322	In	11	0	1
701	Fenfuram	1	3	3	3	Good	-0.53322	In	11	0	1
720	Fenpiclonil	1	3	3	3	Good	-0.53322	In	11	0	1
767	Fluazolate	1	3	3	3	Good	-0.53322	In	11	0	1
780	Fludioxonil	1	3	3	3	Good	-0.53322	In	11	0	1
783	Flufenacet	1	3	3	3	Good	-0.53322	In	11	0	1
784	Flufenerim	1	3	3	3	Good	-0.53322	In	11	0	1
792	Fluindapyr	1	3	3	3	Good	-0.53322	In	11	0	1
805	Fluorbenside	1	3	3	3	Good	-0.53322	In	11	0	1
829	Flurazole	1	3	3	3	Good	-0.53322	In	11	0	1
836	Flurprimidol	1	3	3	3	Good	-0.53322	In	11	0	1
871	Furametpyr	1	3	3	3	Good	-0.53322	In	11	0	1
916	Hexachlorophene	1	3	3	3	Good	-0.53322	In	11	0	1
954	Indaziflam	1	3	3	3	Good	-0.53322	In	11	0	1
959	Inpyrfluxam	1	3	3	3	Good	-0.53322	In	11	0	1
989	Isoflucypram	1	3	3	3	Good	-0.53322	In	11	0	1
1001	Isopyrazam	1	3	3	3	Good	-0.53322	In	11	0	1
1002	Isopyrimol	1	3	3	3	Good	-0.53322	In	11	0	1
1007	Isoxaben	1	3	3	3	Good	-0.53322	In	11	0	1
1064	Mecarbinzid	1	3	3	3	Good	-0.53322	In	11	0	1
1101	Metazachlor	1	3	3	3	Good	-0.53322	In	11	0	1
1112	Methfuroxam	1	3	3	3	Good	-0.53322	In	11	0	1
1117	Methiozolin	1	3	3	3	Good	-0.53322	In	11	0	1
1123	Methoxychlor	1	3	3	3	Good	-0.53322	In	11	0	1
1147	Metsulfovax	1	3	3	3	Good	-0.53322	In	11	0	1
1169	Myclobutanil	1	3	3	3	Good	-0.53322	In	11	0	1
1170	Myclobutanil hydrochloride	1	3	3	3	Good	-0.53322	In	11	0	1
1181	Napropamide	1	3	3	3	Good	-0.53322	In	11	0	1
1182	Napropamide-M	1	3	3	3	Good	-0.53322	In	11	0	1
1191	Nitralin	1	3	3	3	Good	-0.53322	In	11	0	1
1207	O,O'-DDT	1	3	3	3	Good	-0.53322	In	11	0	1
1208	O,P'-DDT	1	3	3	3	Good	-0.53322	In	11	0	1
1217	Oryzalin	1	3	3	3	Good	-0.53322	In	11	0	1
1229	Oxpoconazole	1	3	3	3	Good	-0.53322	In	11	0	1
1230	Oxpoconazole fumarate	1	3	3	3	Good	-0.53322	In	11	0	1
1236	Paraquat	1	3	3	3	Good	-0.53322	In	11	0	1
1245	Penflufen	1	3	3	3	Good	-0.53322	In	11	0	1
1296	Pretilachlor	1	3	3	3	Good	-0.53322	In	11	0	1
1332	Propoxycarbazone	1	3	3	3	Good	-0.53322	In	11	0	1
1349	Pydiflumetofen	1	3	3	3	Good	-0.53322	In	11	0	1
1354	Pyraclonil	1	3	3	3	Good	-0.53322	In	11	0	1
1356	Pyraflufen-ethyl	1	3	3	3	Good	-0.53322	In	11	0	1
1386	Pyrimethanil	1	3	3	3	Good	-0.53322	In	11	0	1
1387	Pyrimidifen	1	3	3	3	Good	-0.53322	In	11	0	1
1395	Pyrisoxazole	1	3	3	3	Good	-0.53322	In	11	0	1
1400	Quinacetol	1	3	3	3	Good	-0.53322	In	11	0	1
1403	Quinclorac	1	3	3	3	Good	-0.53322	In	11	0	1
1405	Quinmerac	1	3	3	3	Good	-0.53322	In	11	0	1
1427	Sedaxane	1	3	3	3	Good	-0.53322	In	11	0	1
1488	Tebufenpyrad	1	3	3	3	Good	-0.53322	In	11	0	1
1489	Tebufloquin	1	3	3	3	Good	-0.53322	In	11	0	1
1518	Tetrasul	1	3	3	3	Good	-0.53322	In	11	0	1
1519	Thenylchlor	1	3	3	3	Good	-0.53322	In	11	0	1
1529	Thidiazuron	1	3	3	3	Good	-0.53322	In	11	0	1
1534	Thifluzamide	1	3	3	3	Good	-0.53322	In	11	0	1
1543	Thioquinox	1	3	3	3	Good	-0.53322	In	11	0	1
1547	Tiadinil	1	3	3	3	Good	-0.53322	In	11	0	1
1562	Topramezone	1	3	3	3	Good	-0.53322	In	11	0	1
1566	Tralopyril	1	3	3	3	Good	-0.53322	In	11	0	1
1572	Triadimefon	1	3	3	3	Good	-0.53322	In	11	0	1
1582	Triaziflam	1	3	3	3	Good	-0.53322	In	11	0	1
1607	Triflumizole	1	3	3	3	Good	-0.53322	In	11	0	1
1622	Tyclopyrazoflor	1	3	3	3	Good	-0.53322	In	11	0	1
1524	Thiapronil	1	3	3	3	Good	-0.578684	In	27	0.145308	0.87234
42	2,6-dichloro-N-((4-(trifluoromethyl)phenyl)methyl-benzamide	1	3	3	3	Good	-0.659613	In	11	0.051778	0.923077
64	Acetoprole	1	3	3	3	Good	-0.659613	In	11	0.051778	0.923077
139	Azobenzene	1	3	3	3	Good	-0.659613	In	11	0.051778	0.923077
142	Azoxybenzene	1	3	3	3	Good	-0.659613	In	11	0.051778	0.923077
146	Beflubutamid	1	3	3	3	Good	-0.659613	In	11	0.051778	0.923077
158	Benodanil	1	3	3	3	Good	-0.659613	In	11	0.051778	0.923077
178	Benzipram	1	3	3	3	Good	-0.659613	In	11	0.051778	0.923077
183	Benzovindiflupyr	1	3	3	3	Good	-0.659613	In	11	0.051778	0.923077
188	Benzyl benzoate	1	3	3	3	Good	-0.659613	In	11	0.051778	0.923077
194	Bifenazate	1	3	3	3	Good	-0.659613	In	11	0.051778	0.923077
229	Bromopropylate	1	3	3	3	Good	-0.659613	In	11	0.051778	0.923077
251	Buthiobate	1	3	3	3	Good	-0.659613	In	11	0.051778	0.923077
305	Chlorazifop	1	3	3	3	Good	-0.659613	In	11	0.051778	0.923077
325	Chlorfensulphide	1	3	3	3	Good	-0.659613	In	11	0.051778	0.923077
329	Chlorfluren	1	3	3	3	Good	-0.659613	In	11	0.051778	0.923077
330	Chlorfluren methyl	1	3	3	3	Good	-0.659613	In	11	0.051778	0.923077
331	Chlorflurenol	1	3	3	3	Good	-0.659613	In	11	0.051778	0.923077
332	Chlorflurenol methyl	1	3	3	3	Good	-0.659613	In	11	0.051778	0.923077
340	Chlorobenzilate	1	3	3	3	Good	-0.659613	In	11	0.051778	0.923077
346	Chloropropylate	1	3	3	3	Good	-0.659613	In	11	0.051778	0.923077
350	Chloroxuron	1	3	3	3	Good	-0.659613	In	11	0.051778	0.923077
382	Clodinafop	1	3	3	3	Good	-0.659613	In	11	0.051778	0.923077
388	Clofop	1	3	3	3	Good	-0.659613	In	11	0.051778	0.923077
389	Clofop-isobutyl	1	3	3	3	Good	-0.659613	In	11	0.051778	0.923077
391	Clomeprop	1	3	3	3	Good	-0.659613	In	11	0.051778	0.923077
401	Copper bis(3-phenylsalicylate)	1	3	3	3	Good	-0.659613	In	11	0.051778	0.923077
416	Cumyluron	1	3	3	3	Good	-0.659613	In	11	0.051778	0.923077
433	Cyclopyrimorate	1	3	3	3	Good	-0.659613	In	11	0.051778	0.923077
449	Cypendazole	1	3	3	3	Good	-0.659613	In	11	0.051778	0.923077
464	Daimuron	1	3	3	3	Good	-0.659613	In	11	0.051778	0.923077
484	Denatonium benzoate	1	3	3	3	Good	-0.659613	In	11	0.051778	0.923077
488	Diafenthiuron	1	3	3	3	Good	-0.659613	In	11	0.051778	0.923077
523	Diclofop	1	3	3	3	Good	-0.659613	In	11	0.051778	0.923077
524	Diclofop-methyl	1	3	3	3	Good	-0.659613	In	11	0.051778	0.923077
546	Difenoxuron	1	3	3	3	Good	-0.659613	In	11	0.051778	0.923077
596	Diphenamid	1	3	3	3	Good	-0.659613	In	11	0.051778	0.923077
658	Ethiprole	1	3	3	3	Good	-0.659613	In	11	0.051778	0.923077
681	Etoxazole	1	3	3	3	Good	-0.659613	In	11	0.051778	0.923077
719	Fenoxycarb	1	3	3	3	Good	-0.659613	In	11	0.051778	0.923077
744	Ferimzone	1	3	3	3	Good	-0.659613	In	11	0.051778	0.923077
746	Fipronil	1	3	3	3	Good	-0.659613	In	11	0.051778	0.923077
757	Florpyrauxifen	1	3	3	3	Good	-0.659613	In	11	0.051778	0.923077
762	Fluazifop	1	3	3	3	Good	-0.659613	In	11	0.051778	0.923077
763	Fluazifop-butyl	1	3	3	3	Good	-0.659613	In	11	0.051778	0.923077
764	Fluazifop-P	1	3	3	3	Good	-0.659613	In	11	0.051778	0.923077
765	Fluazifop-P-butyl	1	3	3	3	Good	-0.659613	In	11	0.051778	0.923077
777	Flucofuron	1	3	3	3	Good	-0.659613	In	11	0.051778	0.923077
781	Fluenetil	1	3	3	3	Good	-0.659613	In	11	0.051778	0.923077
802	Fluopicolide	1	3	3	3	Good	-0.659613	In	11	0.051778	0.923077
803	Fluopimomide	1	3	3	3	Good	-0.659613	In	11	0.051778	0.923077
804	Fluopyram	1	3	3	3	Good	-0.659613	In	11	0.051778	0.923077
830	Flurenol	1	3	3	3	Good	-0.659613	In	11	0.051778	0.923077
831	Flurenol-butyl	1	3	3	3	Good	-0.659613	In	11	0.051778	0.923077
843	Flutolanil	1	3	3	3	Good	-0.659613	In	11	0.051778	0.923077
853	Forchlorfenuron	1	3	3	3	Good	-0.659613	In	11	0.051778	0.923077
869	Furalaxyl	1	3	3	3	Good	-0.659613	In	11	0.051778	0.923077
898	Halauxifen	1	3	3	3	Good	-0.659613	In	11	0.051778	0.923077
899	Halauxifen-methyl	1	3	3	3	Good	-0.659613	In	11	0.051778	0.923077
905	Haloxyfop	1	3	3	3	Good	-0.659613	In	11	0.051778	0.923077
906	Haloxyfop-etotyl	1	3	3	3	Good	-0.659613	In	11	0.051778	0.923077
907	Haloxyfop-P	1	3	3	3	Good	-0.659613	In	11	0.051778	0.923077
908	Haloxyfop-P-methyl	1	3	3	3	Good	-0.659613	In	11	0.051778	0.923077
988	Isofetamid	1	3	3	3	Good	-0.659613	In	11	0.051778	0.923077
1004	Isotianil	1	3	3	3	Good	-0.659613	In	11	0.051778	0.923077
1012	Isoxapyrifop	1	3	3	3	Good	-0.659613	In	11	0.051778	0.923077
1043	Mandestrobin	1	3	3	3	Good	-0.659613	In	11	0.051778	0.923077
1062	Mebenil	1	3	3	3	Good	-0.659613	In	11	0.051778	0.923077
1082	Mepanipyrim	1	3	3	3	Good	-0.659613	In	11	0.051778	0.923077
1087	Mepronil	1	3	3	3	Good	-0.659613	In	11	0.051778	0.923077
1092	Mesotrione	1	3	3	3	Good	-0.659613	In	11	0.051778	0.923077
1125	Methoxyphenone	1	3	3	3	Good	-0.659613	In	11	0.051778	0.923077
1132	Methyldymron	1	3	3	3	Good	-0.659613	In	11	0.051778	0.923077
1136	Metobenzuron	1	3	3	3	Good	-0.659613	In	11	0.051778	0.923077
1145	Metrafenone	1	3	3	3	Good	-0.659613	In	11	0.051778	0.923077
1243	Pencycuron	1	3	3	3	Good	-0.659613	In	11	0.051778	0.923077
1350	Pyflubumide	1	3	3	3	Good	-0.659613	In	11	0.051778	0.923077
1375	Pyributicarb	1	3	3	3	Good	-0.659613	In	11	0.051778	0.923077
1381	Pyridate	1	3	3	3	Good	-0.659613	In	11	0.051778	0.923077
1382	Pyridinitril	1	3	3	3	Good	-0.659613	In	11	0.051778	0.923077
1383	Pyrifenox	1	3	3	3	Good	-0.659613	In	11	0.051778	0.923077
1385	Pyriftalid	1	3	3	3	Good	-0.659613	In	11	0.051778	0.923077
1392	Pyriofenone	1	3	3	3	Good	-0.659613	In	11	0.051778	0.923077
1396	Pyrithiobac-sodium	1	3	3	3	Good	-0.659613	In	11	0.051778	0.923077
1594	Triclopyricarb	1	3	3	3	Good	-0.659613	In	11	0.051778	0.923077
179	Benzobicyclon	1	3	3	3	Good	-0.705077	In	27	0.193744	0.836735
3	(R)-flufiprole	1	3	3	3	Good	-0.786006	In	11	0.103556	0.857143
8	1-(4-chlorophenyl)-3-(2,6-dichlorobenzoyl)urea	1	3	3	3	Good	-0.786006	In	11	0.103556	0.857143
69	Aclonifen	1	3	3	3	Good	-0.786006	In	11	0.103556	0.857143
113	Amitraz	1	3	3	3	Good	-0.786006	In	11	0.103556	0.857143
124	Anisuron	1	3	3	3	Good	-0.786006	In	11	0.103556	0.857143
147	Benalaxyl	1	3	3	3	Good	-0.786006	In	11	0.103556	0.857143
148	Benalaxyl-M	1	3	3	3	Good	-0.786006	In	11	0.103556	0.857143
161	Benquinox	1	3	3	3	Good	-0.786006	In	11	0.103556	0.857143
184	Benzoximate	1	3	3	3	Good	-0.786006	In	11	0.103556	0.857143
185	Benzoylprop	1	3	3	3	Good	-0.786006	In	11	0.103556	0.857143
186	Benzoylprop-ethyl	1	3	3	3	Good	-0.786006	In	11	0.103556	0.857143
208	Bistrifluron	1	3	3	3	Good	-0.786006	In	11	0.103556	0.857143
263	Cafenstrole	1	3	3	3	Good	-0.786006	In	11	0.103556	0.857143
296	Chlomethoxyfen	1	3	3	3	Good	-0.786006	In	11	0.103556	0.857143
306	Chlorazifop propargyl	1	3	3	3	Good	-0.786006	In	11	0.103556	0.857143
324	Chlorfenson	1	3	3	3	Good	-0.786006	In	11	0.103556	0.857143
339	Chlornitrofen	1	3	3	3	Good	-0.786006	In	11	0.103556	0.857143
371	Chromafenozide	1	3	3	3	Good	-0.786006	In	11	0.103556	0.857143
383	Clodinafop propargyl	1	3	3	3	Good	-0.786006	In	11	0.103556	0.857143
423	Cyazofamid	1	3	3	3	Good	-0.786006	In	11	0.103556	0.857143
439	Cyflufenamid	1	3	3	3	Good	-0.786006	In	11	0.103556	0.857143
443	Cyhalofop	1	3	3	3	Good	-0.786006	In	11	0.103556	0.857143
444	Cyhalofop-butyl	1	3	3	3	Good	-0.786006	In	11	0.103556	0.857143
485	Desmedipham	1	3	3	3	Good	-0.786006	In	11	0.103556	0.857143
502	Dichlobentiazox	1	3	3	3	Good	-0.786006	In	11	0.103556	0.857143
551	Diflubenzuron	1	3	3	3	Good	-0.786006	In	11	0.103556	0.857143
575	Dimoxystrobin	1	3	3	3	Good	-0.786006	In	11	0.103556	0.857143
664	Ethoxyfen	1	3	3	3	Good	-0.786006	In	11	0.103556	0.857143
665	Ethoxyfen-ethyl	1	3	3	3	Good	-0.786006	In	11	0.103556	0.857143
685	Fenamidone	1	3	3	3	Good	-0.786006	In	11	0.103556	0.857143
705	Fenmezoditiaz	1	3	3	3	Good	-0.786006	In	11	0.103556	0.857143
723	Fenpropathrin	1	3	3	3	Good	-0.786006	In	11	0.103556	0.857143
732	Fenson	1	3	3	3	Good	-0.786006	In	11	0.103556	0.857143
747	Flamprop	1	3	3	3	Good	-0.786006	In	11	0.103556	0.857143
748	Flamprop-isopropyl	1	3	3	3	Good	-0.786006	In	11	0.103556	0.857143
749	Flamprop-methyl	1	3	3	3	Good	-0.786006	In	11	0.103556	0.857143
750	Flamprop-M-isopropyl	1	3	3	3	Good	-0.786006	In	11	0.103556	0.857143
751	Flamprop-M-methyl	1	3	3	3	Good	-0.786006	In	11	0.103556	0.857143
760	Fluacrypyrim	1	3	3	3	Good	-0.786006	In	11	0.103556	0.857143
787	Flufenoxystrobin	1	3	3	3	Good	-0.786006	In	11	0.103556	0.857143
791	Flufiprole	1	3	3	3	Good	-0.786006	In	11	0.103556	0.857143
812	Fluoronitrofen	1	3	3	3	Good	-0.786006	In	11	0.103556	0.857143
837	Flurtamone	1	3	3	3	Good	-0.786006	In	11	0.103556	0.857143
865	Fufenozide	1	3	3	3	Good	-0.786006	In	11	0.103556	0.857143
878	Furyloxyfen	1	3	3	3	Good	-0.786006	In	11	0.103556	0.857143
901	Halofenozide	1	3	3	3	Good	-0.786006	In	11	0.103556	0.857143
919	Hexaflumuron	1	3	3	3	Good	-0.786006	In	11	0.103556	0.857143
940	Imazaquin	1	3	3	3	Good	-0.786006	In	11	0.103556	0.857143
941	Imazaquin methyl	1	3	3	3	Good	-0.786006	In	11	0.103556	0.857143
952	Indanofan	1	3	3	3	Good	-0.786006	In	11	0.103556	0.857143
1008	Isoxachlortole	1	3	3	3	Good	-0.786006	In	11	0.103556	0.857143
1009	Isoxadifen	1	3	3	3	Good	-0.786006	In	11	0.103556	0.857143
1010	Isoxadifen ethyl	1	3	3	3	Good	-0.786006	In	11	0.103556	0.857143
1011	Isoxaflutole	1	3	3	3	Good	-0.786006	In	11	0.103556	0.857143
1024	Kresoxim-methyl	1	3	3	3	Good	-0.786006	In	11	0.103556	0.857143
1036	Lufenuron	1	3	3	3	Good	-0.786006	In	11	0.103556	0.857143
1124	Methoxyfenozide	1	3	3	3	Good	-0.786006	In	11	0.103556	0.857143
1141	Metominostrobin	1	3	3	3	Good	-0.786006	In	11	0.103556	0.857143
1155	Mivorilaner	1	3	3	3	Good	-0.786006	In	11	0.103556	0.857143
1166	Morfamquat	1	3	3	3	Good	-0.786006	In	11	0.103556	0.857143
1194	Nitrofen	1	3	3	3	Good	-0.786006	In	11	0.103556	0.857143
1204	Novaluron	1	3	3	3	Good	-0.786006	In	11	0.103556	0.857143
1205	Noviflumuron	1	3	3	3	Good	-0.786006	In	11	0.103556	0.857143
1234	Oxyfluorfen	1	3	3	3	Good	-0.786006	In	11	0.103556	0.857143
1246	Penfluron	1	3	3	3	Good	-0.786006	In	11	0.103556	0.857143
1256	Phenisopham	1	3	3	3	Good	-0.786006	In	11	0.103556	0.857143
1258	Phenobenzuron	1	3	3	3	Good	-0.786006	In	11	0.103556	0.857143
1278	Picoxystrobin	1	3	3	3	Good	-0.786006	In	11	0.103556	0.857143
1318	Propamidine	1	3	3	3	Good	-0.786006	In	11	0.103556	0.857143
1362	Pyrapropoyne	1	3	3	3	Good	-0.786006	In	11	0.103556	0.857143
1373	Pyribencarb	1	3	3	3	Good	-0.786006	In	11	0.103556	0.857143
1384	Pyrifluquinazon	1	3	3	3	Good	-0.786006	In	11	0.103556	0.857143
1388	Pyriminobac-methyl	1	3	3	3	Good	-0.786006	In	11	0.103556	0.857143
1390	Pyrimisulfan	1	3	3	3	Good	-0.786006	In	11	0.103556	0.857143
1413	Quintrione	1	3	3	3	Good	-0.786006	In	11	0.103556	0.857143
1487	Tebufenozide	1	3	3	3	Good	-0.786006	In	11	0.103556	0.857143
1493	Tecloftalam	1	3	3	3	Good	-0.786006	In	11	0.103556	0.857143
1495	Teflubenzuron	1	3	3	3	Good	-0.786006	In	11	0.103556	0.857143
1510	Tetflupyrolimet	1	3	3	3	Good	-0.786006	In	11	0.103556	0.857143
1564	Tralocythrin	1	3	3	3	Good	-0.786006	In	11	0.103556	0.857143
1565	Tralomethrin	1	3	3	3	Good	-0.786006	In	11	0.103556	0.857143
1596	Tricyclazole	1	3	3	3	Good	-0.786006	In	11	0.103556	0.857143
1608	Triflumuron	1	3	3	3	Good	-0.786006	In	11	0.103556	0.857143
1612	Trifopsime	1	3	3	3	Good	-0.786006	In	11	0.103556	0.857143
67	Acifluorfen	1	3	3	3	Good	-0.912399	In	11	0.155334	0.8
68	Acifluorfen-methyl	1	3	3	3	Good	-0.912399	In	11	0.155334	0.8
195	Bifenox	1	3	3	3	Good	-0.912399	In	11	0.155334	0.8
361	Chlorsulfuron	1	3	3	3	Good	-0.912399	In	11	0.155334	0.8
374	Cinosulfuron	1	3	3	3	Good	-0.912399	In	11	0.155334	0.8
440	Cyflumetofen	1	3	3	3	Good	-0.912399	In	11	0.155334	0.8
442	Cyhalodiamide	1	3	3	3	Good	-0.912399	In	11	0.155334	0.8
553	Diflufenzopyr	1	3	3	3	Good	-0.912399	In	11	0.155334	0.8
668	Ethoxysulfuron	1	3	3	3	Good	-0.912399	In	11	0.155334	0.8
752	Flazasulfuron	1	3	3	3	Good	-0.912399	In	11	0.155334	0.8
770	Flubenzimine	1	3	3	3	Good	-0.912399	In	11	0.155334	0.8
832	Fluridone	1	3	3	3	Good	-0.912399	In	11	0.155334	0.8
846	Fluxametamide	1	3	3	3	Good	-0.912399	In	11	0.155334	0.8
864	Fuberidazole	1	3	3	3	Good	-0.912399	In	11	0.155334	0.8
903	Halosulfuron-methyl	1	3	3	3	Good	-0.912399	In	11	0.155334	0.8
965	Iofensulfuron	1	3	3	3	Good	-0.912399	In	11	0.155334	0.8
970	Ipfencarbazone	1	3	3	3	Good	-0.912399	In	11	0.155334	0.8
984	Isocycloseram	1	3	3	3	Good	-0.912399	In	11	0.155334	0.8
1044	Mandipropamid	1	3	3	3	Good	-0.912399	In	11	0.155334	0.8
1100	Metarylpicoxamid	1	3	3	3	Good	-0.912399	In	11	0.155334	0.8
1102	Metazosulfuron	1	3	3	3	Good	-0.912399	In	11	0.155334	0.8
1186	Niclosamide	1	3	3	3	Good	-0.912399	In	11	0.155334	0.8
1339	Prosulfuron	1	3	3	3	Good	-0.912399	In	11	0.155334	0.8
1368	Pyrazosulfuron	1	3	3	3	Good	-0.912399	In	11	0.155334	0.8
1369	Pyrazosulfuron-ethyl	1	3	3	3	Good	-0.912399	In	11	0.155334	0.8
1415	Rabenzazole	1	3	3	3	Good	-0.912399	In	11	0.155334	0.8
1441	Sintofen	1	3	3	3	Good	-0.912399	In	11	0.155334	0.8
1521	Thiabendazole	1	3	3	3	Good	-0.912399	In	11	0.155334	0.8
1532	Thifensulfuron	1	3	3	3	Good	-0.912399	In	11	0.155334	0.8
1533	Thifensulfuron-methyl	1	3	3	3	Good	-0.912399	In	11	0.155334	0.8
1559	Tolpyralate	1	3	3	3	Good	-0.912399	In	11	0.155334	0.8
1574	Triafamone	1	3	3	3	Good	-0.912399	In	11	0.155334	0.8
1580	Triasulfuron	1	3	3	3	Good	-0.912399	In	11	0.155334	0.8
1602	Trifloxystrobin	1	3	3	3	Good	-0.912399	In	11	0.155334	0.8
1603	Trifloxysulfuron	1	3	3	3	Good	-0.912399	In	11	0.155334	0.8
1621	Tritosulfuron	1	3	3	3	Good	-0.912399	In	11	0.155334	0.8
162	Bensulfuron	1	3	3	3	Good	-1.03879	In	11	0.207112	0.75
163	Bensulfuron-methyl	1	3	3	3	Good	-1.03879	In	11	0.207112	0.75
165	Bensultap	1	3	3	3	Good	-1.03879	In	11	0.207112	0.75
220	Bromethalin	1	3	3	3	Good	-1.03879	In	11	0.207112	0.75
320	Chlorfenazole	1	3	3	3	Good	-1.03879	In	11	0.207112	0.75
334	Chlorimuron	1	3	3	3	Good	-1.03879	In	11	0.207112	0.75
335	Chlorimuron-ethyl	1	3	3	3	Good	-1.03879	In	11	0.207112	0.75
410	Coumethoxystrobin	1	3	3	3	Good	-1.03879	In	11	0.207112	0.75
412	Coumoxystrobin	1	3	3	3	Good	-1.03879	In	11	0.207112	0.75
434	Cyclosulfamuron	1	3	3	3	Good	-1.03879	In	11	0.207112	0.75
460	Cyprosulfamide	1	3	3	3	Good	-1.03879	In	11	0.207112	0.75
648	Ethametsulfuron-methyl	1	3	3	3	Good	-1.03879	In	11	0.207112	0.75
691	Fenasulam	1	3	3	3	Good	-1.03879	In	11	0.207112	0.75
766	Fluazinam	1	3	3	3	Good	-1.03879	In	11	0.207112	0.75
768	Flubendiamide	1	3	3	3	Good	-1.03879	In	11	0.207112	0.75
772	Flucetosulfuron	1	3	3	3	Good	-1.03879	In	11	0.207112	0.75
793	Flumetralin	1	3	3	3	Good	-1.03879	In	11	0.207112	0.75
808	Fluorodifen	1	3	3	3	Good	-1.03879	In	11	0.207112	0.75
809	Fluoroglycofen	1	3	3	3	Good	-1.03879	In	11	0.207112	0.75
826	Flupyrsulfuron	1	3	3	3	Good	-1.03879	In	11	0.207112	0.75
827	Flupyrsulfuron-methyl-sodium	1	3	3	3	Good	-1.03879	In	11	0.207112	0.75
839	Flusulfamide	1	3	3	3	Good	-1.03879	In	11	0.207112	0.75
957	Indoxacarb	1	3	3	3	Good	-1.03879	In	11	0.207112	0.75
963	Iodosulfuron	1	3	3	3	Good	-1.03879	In	11	0.207112	0.75
964	Iodosulfuron-methyl-sodium	1	3	3	3	Good	-1.03879	In	11	0.207112	0.75
1025	Lactofen	1	3	3	3	Good	-1.03879	In	11	0.207112	0.75
1104	Metcamifen	1	3	3	3	Good	-1.03879	In	11	0.207112	0.75
1126	Methyl (((1-(5-(2-chloro-4-(trifluoromethyl)phenoxy)-2-nitrophenyl)-2-methoxyethylidene)amino)oxy)acetate	1	3	3	3	Good	-1.03879	In	11	0.207112	0.75
1148	Metsulfuron	1	3	3	3	Good	-1.03879	In	11	0.207112	0.75
1149	Metsulfuron-methyl	1	3	3	3	Good	-1.03879	In	11	0.207112	0.75
1163	Monosulfuron-methyl	1	3	3	3	Good	-1.03879	In	11	0.207112	0.75
1188	Nicosulfuron	1	3	3	3	Good	-1.03879	In	11	0.207112	0.75
1215	Orthosulfamuron	1	3	3	3	Good	-1.03879	In	11	0.207112	0.75
1224	Oxasulfuron	1	3	3	3	Good	-1.03879	In	11	0.207112	0.75
1252	Perfluidone	1	3	3	3	Good	-1.03879	In	11	0.207112	0.75
1297	Primisulfuron	1	3	3	3	Good	-1.03879	In	11	0.207112	0.75
1298	Primisulfuron methyl	1	3	3	3	Good	-1.03879	In	11	0.207112	0.75
1447	Sodium lignosulfonate	1	3	3	3	Good	-1.03879	In	11	0.207112	0.75
1448	Sodium metabisulphite	1	3	3	3	Good	-1.03879	In	11	0.207112	0.75
1472	Sulfometuron	1	3	3	3	Good	-1.03879	In	11	0.207112	0.75
1473	Sulfometuron-methyl	1	3	3	3	Good	-1.03879	In	11	0.207112	0.75
1553	Tioxazafen	1	3	3	3	Good	-1.03879	In	11	0.207112	0.75
1584	Triazoxide	1	3	3	3	Good	-1.03879	In	11	0.207112	0.75
1585	Tribenuron	1	3	3	3	Good	-1.03879	In	11	0.207112	0.75
1586	Tribenuron-methyl	1	3	3	3	Good	-1.03879	In	11	0.207112	0.75
1610	Triflusulfuron	1	3	3	3	Good	-1.03879	In	11	0.207112	0.75
1611	Triflusulfuron-methyl	1	3	3	3	Good	-1.03879	In	11	0.207112	0.75
2	(E)-2-(2-(2-(2,3-dichlorophenylamino)-6-trifluoromethylpyrimidin-4-yloxymethyl)phenyl)-3-methoxyacrylate	1	3	3	3	Good	-1.08426	In	27	0.339052	0.745455
4	(R)-flutriafol	1	3	3	3	Good	-1.16518	In	11	0.25889	0.705882
6	(S)-flutriafol	1	3	3	3	Good	-1.16518	In	11	0.25889	0.705882
209	Bitertanol	1	3	3	3	Good	-1.16518	In	11	0.25889	0.705882
543	Difenoconazole	1	3	3	3	Good	-1.16518	In	11	0.25889	0.705882
547	Difenzoquat	1	3	3	3	Good	-1.16518	In	11	0.25889	0.705882
548	Difenzoquat metilsulfate	1	3	3	3	Good	-1.16518	In	11	0.25889	0.705882
635	Epoxiconazole	1	3	3	3	Good	-1.16518	In	11	0.25889	0.705882
692	Fenazaflor	1	3	3	3	Good	-1.16518	In	11	0.25889	0.705882
693	Fenazaquin	1	3	3	3	Good	-1.16518	In	11	0.25889	0.705882
696	Fenchlorazole-ethyl	1	3	3	3	Good	-1.16518	In	11	0.25889	0.705882
715	Fenoxaprop-ethyl	1	3	3	3	Good	-1.16518	In	11	0.25889	0.705882
716	Fenoxaprop-P	1	3	3	3	Good	-1.16518	In	11	0.25889	0.705882
717	Fenoxaprop-P-ethyl	1	3	3	3	Good	-1.16518	In	11	0.25889	0.705882
721	Fenpicoxamid	1	3	3	3	Good	-1.16518	In	11	0.25889	0.705882
729	Fenquinotrione	1	3	3	3	Good	-1.16518	In	11	0.25889	0.705882
734	Fenthiaprop	1	3	3	3	Good	-1.16518	In	11	0.25889	0.705882
735	Fenthiaprop ethyl	1	3	3	3	Good	-1.16518	In	11	0.25889	0.705882
838	Flusilazole	1	3	3	3	Good	-1.16518	In	11	0.25889	0.705882
844	Flutriafol	1	3	3	3	Good	-1.16518	In	11	0.25889	0.705882
850	Fomesafen	1	3	3	3	Good	-1.16518	In	11	0.25889	0.705882
852	Foramsulfuron	1	3	3	3	Good	-1.16518	In	11	0.25889	0.705882
902	Halosafen	1	3	3	3	Good	-1.16518	In	11	0.25889	0.705882
953	Indazapyroxamet	1	3	3	3	Good	-1.16518	In	11	0.25889	0.705882
955	Indolauxipyr	1	3	3	3	Good	-1.16518	In	11	0.25889	0.705882
971	Ipfentrifluconazole	1	3	3	3	Good	-1.16518	In	11	0.25889	0.705882
972	Ipflufenoquin	1	3	3	3	Good	-1.16518	In	11	0.25889	0.705882
1076	Mefenacet	1	3	3	3	Good	-1.16518	In	11	0.25889	0.705882
1079	Mefentrifluconazole	1	3	3	3	Good	-1.16518	In	11	0.25889	0.705882
1162	Monosulfuron	1	3	3	3	Good	-1.16518	In	11	0.25889	0.705882
1410	Quinoxyfen	1	3	3	3	Good	-1.16518	In	11	0.25889	0.705882
1418	Rimisoxafen	1	3	3	3	Good	-1.16518	In	11	0.25889	0.705882
1419	Rimsulfuron	1	3	3	3	Good	-1.16518	In	11	0.25889	0.705882
211	Bixafen	1	3	3	3	Good	-1.29158	In	11	0.310668	0.666667
386	Clofentezine	1	3	3	3	Good	-1.29158	In	11	0.310668	0.666667
528	Diclosulam	1	3	3	3	Good	-1.29158	In	11	0.310668	0.666667
550	Diflovidazin	1	3	3	3	Good	-1.29158	In	11	0.310668	0.666667
680	Etofenprox	1	3	3	3	Good	-1.29158	In	11	0.310668	0.666667
690	Fenarimol	1	3	3	3	Good	-1.29158	In	11	0.310668	0.666667
694	Fenbuconazole	1	3	3	3	Good	-1.29158	In	11	0.310668	0.666667
754	Flometoquin	1	3	3	3	Good	-1.29158	In	11	0.310668	0.666667
756	Florasulam	1	3	3	3	Good	-1.29158	In	11	0.310668	0.666667
769	Flubeneteram	1	3	3	3	Good	-1.29158	In	11	0.310668	0.666667
785	Flufenoxadiazam	1	3	3	3	Good	-1.29158	In	11	0.310668	0.666667
788	Flufenprox	1	3	3	3	Good	-1.29158	In	11	0.310668	0.666667
794	Flumetsulam	1	3	3	3	Good	-1.29158	In	11	0.310668	0.666667
819	Flupoxam	1	3	3	3	Good	-1.29158	In	11	0.310668	0.666667
847	Fluxapyroxad	1	3	3	3	Good	-1.29158	In	11	0.310668	0.666667
900	Halfenprox	1	3	3	3	Good	-1.29158	In	11	0.310668	0.666667
945	Imibenconazole	1	3	3	3	Good	-1.29158	In	11	0.310668	0.666667
956	Indolauxipyr-cyanomethyl	1	3	3	3	Good	-1.29158	In	11	0.310668	0.666667
1090	Mesosulfuron	1	3	3	3	Good	-1.29158	In	11	0.310668	0.666667
1091	Mesosulfuron-methyl	1	3	3	3	Good	-1.29158	In	11	0.310668	0.666667
1142	Metosulam	1	3	3	3	Good	-1.29158	In	11	0.310668	0.666667
1180	Naproanilide	1	3	3	3	Good	-1.29158	In	11	0.310668	0.666667
1187	Nicofluprole	1	3	3	3	Good	-1.29158	In	11	0.310668	0.666667
1206	Nuarimol	1	3	3	3	Good	-1.29158	In	11	0.310668	0.666667
1239	Parinol	1	3	3	3	Good	-1.29158	In	11	0.310668	0.666667
1247	Penoxsulam	1	3	3	3	Good	-1.29158	In	11	0.310668	0.666667
1345	Protrifenbute	1	3	3	3	Good	-1.29158	In	11	0.310668	0.666667
1355	Pyraclostrobin	1	3	3	3	Good	-1.29158	In	11	0.310668	0.666667
1357	Pyrafluprole	1	3	3	3	Good	-1.29158	In	11	0.310668	0.666667
1359	Pyrametostrobin	1	3	3	3	Good	-1.29158	In	11	0.310668	0.666667
1377	Pyridachlometyl	1	3	3	3	Good	-1.29158	In	11	0.310668	0.666667
1394	Pyriproxyfen	1	3	3	3	Good	-1.29158	In	11	0.310668	0.666667
1399	Pyroxsulam	1	3	3	3	Good	-1.29158	In	11	0.310668	0.666667
1407	Quinofumelin	1	3	3	3	Good	-1.29158	In	11	0.310668	0.666667
1414	Quizalofop-ethyl	1	3	3	3	Good	-1.29158	In	11	0.310668	0.666667
1433	Silafluofen	1	3	3	3	Good	-1.29158	In	11	0.310668	0.666667
1550	Tigolaner	1	3	3	3	Good	-1.29158	In	11	0.310668	0.666667
1579	Triarimol	1	3	3	3	Good	-1.29158	In	11	0.310668	0.666667
1600	Trifenmorph	1	3	3	3	Good	-1.29158	In	11	0.310668	0.666667
108	Aminopyrofen	1	2	3	2	Moderate	-1.41797	In	13	0.337321	0.6
110	Amisulbrom	1	2	3	2	Moderate	-1.41797	In	13	0.337321	0.6
134	Azimsulfuron	1	2	3	2	Moderate	-1.41797	In	13	0.337321	0.6
180	Benzofenap	1	2	3	2	Moderate	-1.41797	In	13	0.337321	0.6
205	Bispyribac	1	2	3	2	Moderate	-1.41797	In	13	0.337321	0.6
213	Boscalid	1	2	3	2	Moderate	-1.41797	In	13	0.337321	0.6
304	Chlorantraniliprole	1	2	3	2	Moderate	-1.41797	In	13	0.337321	0.6
397	Cloransulam	1	2	3	2	Moderate	-1.41797	In	13	0.337321	0.6
426	Cyclaniliprole	1	2	3	2	Moderate	-1.41797	In	13	0.337321	0.6
527	Dicloromezotiaz	1	2	3	2	Moderate	-1.41797	In	13	0.337321	0.6
552	Diflufenican	1	2	3	2	Moderate	-1.41797	In	13	0.337321	0.6
728	Fenpyroximate	1	2	3	2	Moderate	-1.41797	In	13	0.337321	0.6
758	Florpyrauxifen-benzyl	1	2	3	2	Moderate	-1.41797	In	13	0.337321	0.6
761	Fluazaindolizine	1	2	3	2	Moderate	-1.41797	In	13	0.337321	0.6
776	Fluchlordiniliprole	1	2	3	2	Moderate	-1.41797	In	13	0.337321	0.6
828	Fluquinconazole	1	2	3	2	Moderate	-1.41797	In	13	0.337321	0.6
944	Imazosulfuron	1	2	3	2	Moderate	-1.41797	In	13	0.337321	0.6
951	Inabenfide	1	2	3	2	Moderate	-1.41797	In	13	0.337321	0.6
1150	Metyltetraprole	1	2	3	2	Moderate	-1.41797	In	13	0.337321	0.6
1183	Naptalam	1	2	3	2	Moderate	-1.41797	In	13	0.337321	0.6
1273	Picarbutrazox	1	2	3	2	Moderate	-1.41797	In	13	0.337321	0.6
1277	Picolinafen	1	2	3	2	Moderate	-1.41797	In	13	0.337321	0.6
1322	Propaquizafop	1	2	3	2	Moderate	-1.41797	In	13	0.337321	0.6
1335	Propyrisulfuron	1	2	3	2	Moderate	-1.41797	In	13	0.337321	0.6
1361	Pyraoxystrobin	1	2	3	2	Moderate	-1.41797	In	13	0.337321	0.6
1365	Pyraziflumid	1	2	3	2	Moderate	-1.41797	In	13	0.337321	0.6
1370	Pyrazoxyfen	1	2	3	2	Moderate	-1.41797	In	13	0.337321	0.6
1371	Pyribambenz-isopropyl	1	2	3	2	Moderate	-1.41797	In	13	0.337321	0.6
1372	Pyribambenz-propyl	1	2	3	2	Moderate	-1.41797	In	13	0.337321	0.6
1404	Quinconazole	1	2	3	2	Moderate	-1.41797	In	13	0.337321	0.6
1478	Sulphaquinoxaline	1	2	3	2	Moderate	-1.41797	In	13	0.337321	0.6
1552	Tiorantraniliprole	1	2	3	2	Moderate	-1.41797	In	13	0.337321	0.6
202	Bipyrazone	1	2	3	2	Moderate	-1.54436	In	13	0.365348	0.576923
215	Broflanilide	1	2	3	2	Moderate	-1.54436	In	13	0.365348	0.576923
216	Brofluthrinate	1	2	3	2	Moderate	-1.54436	In	13	0.365348	0.576923
271	Cambendichlor	1	2	3	2	Moderate	-1.54436	In	13	0.365348	0.576923
328	Chlorfluazuron	1	2	3	2	Moderate	-1.54436	In	13	0.365348	0.576923
422	Cyantraniliprole	1	2	3	2	Moderate	-1.54436	In	13	0.365348	0.576923
432	Cycloprothrin	1	2	3	2	Moderate	-1.54436	In	13	0.365348	0.576923
457	Cyproflanilide	1	2	3	2	Moderate	-1.54436	In	13	0.365348	0.576923
640	Esfenvalerate	1	2	3	2	Moderate	-1.54436	In	13	0.365348	0.576923
684	Famoxadone	1	2	3	2	Moderate	-1.54436	In	13	0.365348	0.576923
727	Fenpyrazone	1	2	3	2	Moderate	-1.54436	In	13	0.365348	0.576923
742	Fenvalerate	1	2	3	2	Moderate	-1.54436	In	13	0.365348	0.576923
779	Flucythrinate	1	2	3	2	Moderate	-1.54436	In	13	0.365348	0.576923
786	Flufenoxuron	1	2	3	2	Moderate	-1.54436	In	13	0.365348	0.576923
815	Fluoxapiprolin	1	2	3	2	Moderate	-1.54436	In	13	0.365348	0.576923
816	Fluoxastrobin	1	2	3	2	Moderate	-1.54436	In	13	0.365348	0.576923
845	Fluvalinate	1	2	3	2	Moderate	-1.54436	In	13	0.365348	0.576923
1156	Modoflaner	1	2	3	2	Moderate	-1.54436	In	13	0.365348	0.576923
1226	Oxazosulfyl	1	2	3	2	Moderate	-1.54436	In	13	0.365348	0.576923
1366	Pyrazolynate	1	2	3	2	Moderate	-1.54436	In	13	0.365348	0.576923
1389	Pyriminostrobin	1	2	3	2	Moderate	-1.54436	In	13	0.365348	0.576923
1483	Tau-fluvalinate	1	2	3	2	Moderate	-1.54436	In	13	0.365348	0.576923
1606	Triflumezopyrim	1	2	3	2	Moderate	-1.54436	In	13	0.365348	0.576923
143	Azoxystrobin	1	2	2	2	Moderate	-1.67076	In	13	0.396925	0.555556
342	Chlorophacinone	1	2	2	2	Moderate	-1.67076	In	13	0.396925	0.555556
584	Dinofenate	1	2	2	2	Moderate	-1.67076	In	13	0.396925	0.555556
595	Diphacinone	1	2	2	2	Moderate	-1.67076	In	13	0.396925	0.555556
759	Florylpicoxamid	1	2	2	2	Moderate	-1.67076	In	13	0.396925	0.555556
778	Flucycloxuron	1	2	2	2	Moderate	-1.67076	In	13	0.396925	0.555556
817	Fluoxytioconazole	1	2	2	2	Moderate	-1.67076	In	13	0.396925	0.555556
870	Furalaxyl-M	1	2	2	2	Moderate	-1.67076	In	13	0.396925	0.555556
1093	Metaflumizone	1	2	2	2	Moderate	-1.67076	In	13	0.396925	0.555556
1466	Sulcofuron	1	2	2	2	Moderate	-1.67076	In	13	0.396925	0.555556
1467	Sulcofuron-sodium	1	2	2	2	Moderate	-1.67076	In	13	0.396925	0.555556
1474	Sulfosulfuron	1	2	2	2	Moderate	-1.67076	In	13	0.396925	0.555556
521	Diclobutrazol	1	2	2	2	Moderate	-1.79715	In	13	0.431272	0.535714
867	Fuphenthiourea	1	2	2	2	Moderate	-1.79715	In	13	0.431272	0.535714
989	Inabenfide	1	2	3	2	Moderate	-1.5106	In	14	0.337321	0.6
1197	Metyltetraprole	1	2	3	2	Moderate	-1.5106	In	14	0.337321	0.6
1232	Naptalam	1	2	3	2	Moderate	-1.5106	In	14	0.337321	0.6
1325	Picarbutrazox	1	2	3	2	Moderate	-1.5106	In	14	0.337321	0.6
1329	Picolinafen	1	2	3	2	Moderate	-1.5106	In	14	0.337321	0.6
1374	Propaquizafop	1	2	3	2	Moderate	-1.5106	In	14	0.337321	0.6
1387	Propyrisulfuron	1	2	3	2	Moderate	-1.5106	In	14	0.337321	0.6
1413	Pyraoxystrobin	1	2	3	2	Moderate	-1.5106	In	14	0.337321	0.6
1417	Pyraziflumid	1	2	3	2	Moderate	-1.5106	In	14	0.337321	0.6
1422	Pyrazoxyfen	1	2	3	2	Moderate	-1.5106	In	14	0.337321	0.6
1423	Pyribambenz-isopropyl	1	2	3	2	Moderate	-1.5106	In	14	0.337321	0.6
1424	Pyribambenz-propyl	1	2	3	2	Moderate	-1.5106	In	14	0.337321	0.6
1456	Quinconazole	1	2	3	2	Moderate	-1.5106	In	14	0.337321	0.6
1530	Sulphaquinoxaline	1	2	3	2	Moderate	-1.5106	In	14	0.337321	0.6
1605	Tiorantraniliprole	1	2	3	2	Moderate	-1.5106	In	14	0.337321	0.6
213	Bipyrazone	1	2	3	2	Moderate	-1.64649	In	14	0.365348	0.576923
228	Broflanilide	1	2	3	2	Moderate	-1.64649	In	14	0.365348	0.576923
229	Brofluthrinate	1	2	3	2	Moderate	-1.64649	In	14	0.365348	0.576923
287	Cambendichlor	1	2	3	2	Moderate	-1.64649	In	14	0.365348	0.576923
346	Chlorfluazuron	1	2	3	2	Moderate	-1.64649	In	14	0.365348	0.576923
445	Cyantraniliprole	1	2	3	2	Moderate	-1.64649	In	14	0.365348	0.576923
455	Cycloprothrin	1	2	3	2	Moderate	-1.64649	In	14	0.365348	0.576923
481	Cyproflanilide	1	2	3	2	Moderate	-1.64649	In	14	0.365348	0.576923
666	Esfenvalerate	1	2	3	2	Moderate	-1.64649	In	14	0.365348	0.576923
710	Famoxadone	1	2	3	2	Moderate	-1.64649	In	14	0.365348	0.576923
755	Fenpyrazone	1	2	3	2	Moderate	-1.64649	In	14	0.365348	0.576923
773	Fenvalerate	1	2	3	2	Moderate	-1.64649	In	14	0.365348	0.576923
811	Flucythrinate	1	2	3	2	Moderate	-1.64649	In	14	0.365348	0.576923
818	Flufenoxuron	1	2	3	2	Moderate	-1.64649	In	14	0.365348	0.576923
847	Fluoxapiprolin	1	2	3	2	Moderate	-1.64649	In	14	0.365348	0.576923
848	Fluoxastrobin	1	2	3	2	Moderate	-1.64649	In	14	0.365348	0.576923
878	Fluvalinate	1	2	3	2	Moderate	-1.64649	In	14	0.365348	0.576923
1203	Modoflaner	1	2	3	2	Moderate	-1.64649	In	14	0.365348	0.576923
1275	Oxazosulfyl	1	2	3	2	Moderate	-1.64649	In	14	0.365348	0.576923
1418	Pyrazolynate	1	2	3	2	Moderate	-1.64649	In	14	0.365348	0.576923
1441	Pyriminostrobin	1	2	3	2	Moderate	-1.64649	In	14	0.365348	0.576923
1535	Tau-fluvalinate	1	2	3	2	Moderate	-1.64649	In	14	0.365348	0.576923
1660	Triflumezopyrim	1	2	3	2	Moderate	-1.64649	In	14	0.365348	0.576923
153	Azoxystrobin	1	2	2	2	Moderate	-1.78238	In	14	0.396925	0.555556
360	Chlorophacinone	1	2	2	2	Moderate	-1.78238	In	14	0.396925	0.555556
608	Dinofenate	1	2	2	2	Moderate	-1.78238	In	14	0.396925	0.555556
619	Diphacinone	1	2	2	2	Moderate	-1.78238	In	14	0.396925	0.555556
790	Florylpicoxamid	1	2	2	2	Moderate	-1.78238	In	14	0.396925	0.555556
810	Flucycloxuron	1	2	2	2	Moderate	-1.78238	In	14	0.396925	0.555556
849	Fluoxytioconazole	1	2	2	2	Moderate	-1.78238	In	14	0.396925	0.555556
904	Furalaxyl-M	1	2	2	2	Moderate	-1.78238	In	14	0.396925	0.555556
1137	Metaflumizone	1	2	2	2	Moderate	-1.78238	In	14	0.396925	0.555556
1518	Sulcofuron	1	2	2	2	Moderate	-1.78238	In	14	0.396925	0.555556
1519	Sulcofuron-sodium	1	2	2	2	Moderate	-1.78238	In	14	0.396925	0.555556
1526	Sulfosulfuron	1	2	2	2	Moderate	-1.78238	In	14	0.396925	0.555556
545	Diclobutrazol	1	2	2	2	Moderate	-1.91827	In	14	0.431272	0.535714
901	Fuphenthiourea	1	2	2	2	Moderate	-1.91827	In	14	0.431272	0.535714

## Sheet: PRI Result of model M2
No.	Chemical name	Score(MAE-LOO)	Score(Proximity Train YObs Mean)	Score(Similarity based AD)	CompositeScore	PredictionQuality	YPred(Test)	AD status	Closest Training Compound	Euclidean Distance	Generalized Jaccard Coeff.
1325	Propetamphos	1	3	3	3	Good	2.5021	In	1	0.121766	0.888889
240	Buminafos	1	3	3	3	Good	2.27412	In	31	0.412461	0.542373
262	Cadusafos	1	3	3	3	Good	2.27412	In	31	0.412461	0.542373
532	Dicrotophos	1	3	3	3	Good	2.23393	In	1	0	1
1119	Methocrotophos	1	3	3	3	Good	2.23393	In	1	0	1
1151	Mevinphos	1	3	3	3	Good	2.23393	In	1	0	1
1160	Monocrotophos	1	3	3	3	Good	2.23393	In	1	0	1
1269	Phosphamidon	1	3	3	3	Good	2.23393	In	1	0	1
688	Fenamiphos	1	3	3	3	Good	2.04461	In	31	0	1
922	Hexylthiofos	1	3	3	3	Good	2.00595	In	5	0.426875	0.285714
1153	Mipafox	1	3	3	3	Good	2.00595	In	5	0.426875	0.285714
224	Bromocyclen	1	3	3	3	Good	1.96003	In	12	0	1
309	Chlorbicyclen	1	3	3	3	Good	1.96003	In	12	0	1
312	Chlordane	1	3	3	3	Good	1.96003	In	12	0	1
536	Dieldrin	1	3	3	3	Good	1.96003	In	12	0	1
628	Endrin	1	3	3	3	Good	1.96003	In	12	0	1
979	Isobenzan	1	3	3	3	Good	1.96003	In	12	0	1
126	Aspon	1	3	3	3	Good	1.87474	In	31	0.407966	0.474576
656	Ethion	1	3	3	3	Good	1.87474	In	31	0.407966	0.474576
862	Fosthiazate	1	3	3	3	Good	1.87474	In	31	0.407966	0.474576
976	IPSP	1	3	3	3	Good	1.87474	In	31	0.407966	0.474576
1475	Sulfotep	1	3	3	3	Good	1.87474	In	31	0.407966	0.474576
1513	Tetradifon	1	3	3	3	Good	1.87474	In	31	0.407966	0.474576
1514	Tetraethyl pyrophosphate	1	3	3	3	Good	1.87474	In	31	0.407966	0.474576
1089	Merphos	1	3	3	3	Good	1.869	In	5	0.298142	0.272727
18	1,3-butadiene	1	3	3	3	Good	1.82882	In	12	0.0362024	0.941176
90	Alpha-endosulfan	1	3	3	3	Good	1.82882	In	12	0.0362024	0.941176
191	Beta-endosulfan	1	3	3	3	Good	1.82882	In	12	0.0362024	0.941176
487	Di-1-p-menthene	1	3	3	3	Good	1.82882	In	12	0.0362024	0.941176
625	Endosulfan	1	3	3	3	Good	1.82882	In	12	0.0362024	0.941176
928	Hymexazol	1	3	3	3	Good	1.82882	In	12	0.0362024	0.941176
738	Fenthion-ethyl	1	3	3	3	Good	1.77645	In	31	0.128831	0.898305
1321	Propaphos	1	3	3	3	Good	1.77645	In	31	0.128831	0.898305
1480	Sulprofos	1	3	3	3	Good	1.77645	In	31	0.128831	0.898305
892	Glyphosine	1	3	3	3	Good	1.74353	In	31	0.38709	0.508475
111	Amiton	1	3	3	3	Good	1.73779	In	5	0.286744	0.363636
316	Chlorethoxyfos	1	3	3	3	Good	1.73779	In	5	0.286744	0.363636
479	Demeton	1	3	3	3	Good	1.73779	In	5	0.286744	0.363636
606	Disulfoton	1	3	3	3	Good	1.73779	In	5	0.286744	0.363636
663	Ethoprophos	1	3	3	3	Good	1.73779	In	5	0.286744	0.363636
1106	Metepa	1	3	3	3	Good	1.73779	In	5	0.286744	0.363636
1116	Methiotepa	1	3	3	3	Good	1.73779	In	5	0.286744	0.363636
1587	Tribufos	1	3	3	3	Good	1.73779	In	5	0.286744	0.363636
83	Allidochlor	1	3	3	3	Good	1.69761	In	12	0.0724049	0.888889
87	Alorac	1	3	3	3	Good	1.69761	In	12	0.0724049	0.888889
217	Bromacil	1	3	3	3	Good	1.69761	In	12	0.0724049	0.888889
218	Bromacil-dimethylammonium	1	3	3	3	Good	1.69761	In	12	0.0724049	0.888889
255	Butopyronoxyl	1	3	3	3	Good	1.69761	In	12	0.0724049	0.888889
273	Captafol	1	3	3	3	Good	1.69761	In	12	0.0724049	0.888889
274	Captan	1	3	3	3	Good	1.69761	In	12	0.0724049	0.888889
369	Cholecalciferol	1	3	3	3	Good	1.69761	In	12	0.0724049	0.888889
400	Copper abietate	1	3	3	3	Good	1.69761	In	12	0.0724049	0.888889
506	Dichlormid	1	3	3	3	Good	1.69761	In	12	0.0724049	0.888889
866	Fumaric acid	1	3	3	3	Good	1.69761	In	12	0.0724049	0.888889
904	Haloxydine	1	3	3	3	Good	1.69761	In	12	0.0724049	0.888889
983	Isocil	1	3	3	3	Good	1.69761	In	12	0.0724049	0.888889
1039	Maleic hydrazide	1	3	3	3	Good	1.69761	In	12	0.0724049	0.888889
1502	Terbacil	1	3	3	3	Good	1.69761	In	12	0.0724049	0.888889
733	Fensulfothion	1	3	3	3	Good	1.64524	In	31	0.1358	0.868852
353	Chlorphonium	1	3	3	3	Good	1.61805	In	31	0.324929	0.711864
61	Acethion	1	3	3	3	Good	1.60658	In	5	0.282843	0.454545
63	Acetophos	1	3	3	3	Good	1.60658	In	5	0.282843	0.454545
607	Disulfoton sulfoxide	1	3	3	3	Good	1.60658	In	5	0.282843	0.454545
1285	Piperophos	1	3	3	3	Good	1.60658	In	5	0.282843	0.454545
1344	Prothoate	1	3	3	3	Good	1.60658	In	5	0.282843	0.454545
221	Bromfenvinfos	1	3	3	3	Good	1.60083	In	30	0.397972	0.615385
326	Chlorfenvinphos	1	3	3	3	Good	1.60083	In	30	0.397972	0.615385
1378	Pyridafenthion	1	3	3	3	Good	1.58361	In	1	0.309115	0.705882
379	Clethodim	1	3	3	3	Good	1.56639	In	12	0.108607	0.842105
393	Cloproxydim	1	3	3	3	Good	1.56639	In	12	0.108607	0.842105
624	Empenthrin	1	3	3	3	Good	1.56639	In	12	0.108607	0.842105
1028	Lavandulyl senecioate	1	3	3	3	Good	1.56639	In	12	0.108607	0.842105
1174	N1,N2-diallyl-N2-dichloroacetylglycinamide	1	3	3	3	Good	1.56639	In	12	0.108607	0.842105
1500	Tepraloxydim	1	3	3	3	Good	1.56639	In	12	0.108607	0.842105
102	Amidothioate	1	3	3	3	Good	1.50829	In	6	0.159617	0.87234
973	Iprobenfos	1	3	3	3	Good	1.48684	In	30	0.296174	0.678571
1490	Tebupirimfos	1	3	3	3	Good	1.48684	In	30	0.296174	0.678571
112	Amiton oxalate	1	3	3	3	Good	1.47537	In	5	0.286744	0.416667
421	Cyanthoate	1	3	3	3	Good	1.47537	In	5	0.286744	0.416667
946	Imicyafos	1	3	3	3	Good	1.47537	In	5	0.286744	0.416667
1063	Mecarbam	1	3	3	3	Good	1.47537	In	5	0.286744	0.416667
337	Chlormephos	1	3	3	3	Good	1.46963	In	5	0.149071	0.5
1261	Phorate	1	3	3	3	Good	1.46963	In	5	0.149071	0.5
1505	Terbufos	1	3	3	3	Good	1.46963	In	5	0.149071	0.5
19	1,3-dichloropropene	1	3	3	3	Good	1.44667	In	12	0.271518	0.53125
24	1-methylcyclopropene	1	3	3	3	Good	1.44667	In	12	0.271518	0.53125
85	Allyl alcohol	1	3	3	3	Good	1.44667	In	12	0.271518	0.53125
1286	Piproctanyl	1	3	3	3	Good	1.44667	In	12	0.271518	0.53125
82	Allethrin	1	3	3	3	Good	1.43518	In	12	0.14481	0.8
84	Alloxydim	1	3	3	3	Good	1.43518	In	12	0.14481	0.8
198	Bioallethrin	1	3	3	3	Good	1.43518	In	12	0.14481	0.8
564	Dimethipin	1	3	3	3	Good	1.43518	In	12	0.14481	0.8
1422	S-bioallethrin	1	3	3	3	Good	1.43518	In	12	0.14481	0.8
1264	Phosametine	1	3	3	3	Good	1.3656	In	6	0.225733	0.707317
986	Isofenphos	1	3	3	3	Good	1.35563	In	30	0.257443	0.714286
863	Fosthietan	1	3	3	3	Good	1.33842	In	5	0.141421	0.625
1085	Mephosfolan	1	3	3	3	Good	1.33842	In	5	0.141421	0.625
1233	Oxydeprofos	1	3	3	3	Good	1.33842	In	5	0.141421	0.625
1266	Phosfolan	1	3	3	3	Good	1.33842	In	5	0.141421	0.625
71	Acrolein	1	3	3	3	Good	1.31545	In	12	0.273921	0.5
72	Acrylonitrile	1	3	3	3	Good	1.31545	In	12	0.273921	0.5
490	Di-allate	1	3	3	3	Good	1.31545	In	12	0.273921	0.5
994	Isophorone	1	3	3	3	Good	1.31545	In	12	0.273921	0.5
1134	Methylisothiazoline	1	3	3	3	Good	1.31545	In	12	0.273921	0.5
1210	Octhilinone	1	3	3	3	Good	1.31545	In	12	0.273921	0.5
1469	Sulfallate	1	3	3	3	Good	1.31545	In	12	0.273921	0.5
1575	Tri-allate	1	3	3	3	Good	1.31545	In	12	0.273921	0.5
1577	Triapenthenol	1	3	3	3	Good	1.30397	In	12	0.181012	0.761905
736	Fenthion	1	3	3	3	Good	1.24012	In	6	0	1
164	Bensulide	1	3	3	3	Good	1.22442	In	30	0.220755	0.75
245	Butamifos	1	3	3	3	Good	1.22442	In	30	0.220755	0.75
228	Bromophos-ethyl	1	3	3	3	Good	1.21868	In	30	0.264906	0.76
248	Butathiofos	1	3	3	3	Good	1.21868	In	30	0.264906	0.76
367	Chlorthiophos	1	3	3	3	Good	1.21868	In	30	0.264906	0.76
503	Dichlofenthion	1	3	3	3	Good	1.21868	In	30	0.264906	0.76
540	Dietholate	1	3	3	3	Good	1.21868	In	30	0.264906	0.76
644	Etaphos	1	3	3	3	Good	1.21868	In	30	0.264906	0.76
913	Heterophos	1	3	3	3	Good	1.21868	In	30	0.264906	0.76
1304	Profenofos	1	3	3	3	Good	1.21868	In	30	0.264906	0.76
1343	Prothiofos	1	3	3	3	Good	1.21868	In	30	0.264906	0.76
1601	Trifenofos	1	3	3	3	Good	1.21868	In	30	0.264906	0.76
128	Athidathion	1	3	3	3	Good	1.2072	In	5	0.149071	0.555556
991	Isomalathion	1	3	3	3	Good	1.2072	In	5	0.149071	0.555556
1038	Malathion	1	3	3	3	Good	1.2072	In	5	0.149071	0.555556
1340	Prothidathion	1	3	3	3	Good	1.2072	In	5	0.149071	0.555556
120	Ampropylfos	1	3	3	3	Good	1.20146	In	5	0.0471405	0.8
477	Demephion	1	3	3	3	Good	1.20146	In	5	0.0471405	0.8
478	Demephion-O	1	3	3	3	Good	1.20146	In	5	0.0471405	0.8
480	Demeton-O-methyl	1	3	3	3	Good	1.20146	In	5	0.0471405	0.8
482	Demeton-S-methyl	1	3	3	3	Good	1.20146	In	5	0.0471405	0.8
1003	Isothioate	1	3	3	3	Good	1.20146	In	5	0.0471405	0.8
1177	Naled	1	3	3	3	Good	1.20146	In	5	0.0471405	0.8
1539	Thiometon	1	3	3	3	Good	1.20146	In	5	0.0471405	0.8
436	Cycloxydim	1	3	3	3	Good	1.18424	In	8	0.23281	0.677419
565	Dimethirimol	1	3	3	3	Good	1.18424	In	8	0.23281	0.677419
659	Ethirimol	1	3	3	3	Good	1.18424	In	8	0.23281	0.677419
1029	Lenacil	1	3	3	3	Good	1.18424	In	8	0.23281	0.677419
1293	Polyacrylamide	1	3	3	3	Good	1.18424	In	8	0.23281	0.677419
1430	Sethoxydim	1	3	3	3	Good	1.18424	In	8	0.23281	0.677419
1458	Spinetoram	1	3	3	3	Good	1.18424	In	8	0.23281	0.677419
737	Fenthion sulfoxide	1	3	3	3	Good	1.10891	In	6	0.0532058	0.953488
977	Isamidofos	1	3	3	3	Good	1.08747	In	30	0.220755	0.8
987	Isofenphos-methyl	1	3	3	3	Good	1.08747	In	30	0.220755	0.8
57	Acephate	1	3	3	3	Good	1.07025	In	5	0	1
98	Amidithion	1	3	3	3	Good	1.07025	In	5	0	1
254	Butonate	1	3	3	3	Good	1.07025	In	5	0	1
270	Calvinphos	1	3	3	3	Good	1.07025	In	5	0	1
463	DAEP	1	3	3	3	Good	1.07025	In	5	0	1
519	Dichlorvos	1	3	3	3	Good	1.07025	In	5	0	1
566	Dimethoate	1	3	3	3	Good	1.07025	In	5	0	1
660	Ethoate-methyl	1	3	3	3	Good	1.07025	In	5	0	1
858	Fosamine	1	3	3	3	Good	1.07025	In	5	0	1
859	Fosetyl	1	3	3	3	Good	1.07025	In	5	0	1
881	Glufosinate	1	3	3	3	Good	1.07025	In	5	0	1
882	Glufosinate-ammonium	1	3	3	3	Good	1.07025	In	5	0	1
887	Glyphosate	1	3	3	3	Good	1.07025	In	5	0	1
888	Glyphosate-dimethylammonium	1	3	3	3	Good	1.07025	In	5	0	1
889	Glyphosate-isopropylamine	1	3	3	3	Good	1.07025	In	5	0	1
890	Glyphosate-monoammonium	1	3	3	3	Good	1.07025	In	5	0	1
891	Glyphosate-trimesium	1	3	3	3	Good	1.07025	In	5	0	1
1131	Methylacetophos	1	3	3	3	Good	1.07025	In	5	0	1
1167	Morphothion	1	3	3	3	Good	1.07025	In	5	0	1
1213	Omethoate	1	3	3	3	Good	1.07025	In	5	0	1
1232	Oxydemeton-methyl	1	3	3	3	Good	1.07025	In	5	0	1
1627	Vamidothion	1	3	3	3	Good	1.07025	In	5	0	1
9	1,1,1,2-tetrachloroethane	1	3	3	3	Good	1.06451	In	29	0	NaN
11	1,1,1-trichloroethane	1	3	3	3	Good	1.06451	In	29	0	NaN
13	1,1-dichloroethane	1	3	3	3	Good	1.06451	In	29	0	NaN
14	1,2,3-trichloropropane	1	3	3	3	Good	1.06451	In	29	0	NaN
16	1,2-dibromoethane	1	3	3	3	Good	1.06451	In	29	0	NaN
17	1,2-dichloropropane	1	3	3	3	Good	1.06451	In	29	0	NaN
22	1,4-dioxane	1	3	3	3	Good	1.06451	In	29	0	NaN
23	1-decanol	1	3	3	3	Good	1.06451	In	29	0	NaN
29	2-(octylthio)ethanol	1	3	3	3	Good	1.06451	In	29	0	NaN
45	2-aminobutane	1	3	3	3	Good	1.06451	In	29	0	NaN
46	2-butoxyethanol	1	3	3	3	Good	1.06451	In	29	0	NaN
47	2-hydrazinoethanol	1	3	3	3	Good	1.06451	In	29	0	NaN
48	2-methoxyethanol	1	3	3	3	Good	1.06451	In	29	0	NaN
49	2-methoxyethylmercury chloride	1	3	3	3	Good	1.06451	In	29	0	NaN
79	Aldimorph	1	3	3	3	Good	1.06451	In	29	0	NaN
88	Alpha-chlorohydrin	1	3	3	3	Good	1.06451	In	29	0	NaN
203	Bis(2-chloroethyl)ether	1	3	3	3	Good	1.06451	In	29	0	NaN
226	Bromomethane	1	3	3	3	Good	1.06451	In	29	0	NaN
246	Butan-1-ol	1	3	3	3	Good	1.06451	In	29	0	NaN
247	Butanethiol	1	3	3	3	Good	1.06451	In	29	0	NaN
272	Camphechlor	1	3	3	3	Good	1.06451	In	29	0	NaN
284	Carbon tetrachloride	1	3	3	3	Good	1.06451	In	29	0	NaN
293	Cetrimide	1	3	3	3	Good	1.06451	In	29	0	NaN
297	Chloral hydrate	1	3	3	3	Good	1.06451	In	29	0	NaN
298	Chloralose	1	3	3	3	Good	1.06451	In	29	0	NaN
338	Chlormequat	1	3	3	3	Good	1.06451	In	29	0	NaN
370	Choline chloride	1	3	3	3	Good	1.06451	In	29	0	NaN
405	Copper oxychloride	1	3	3	3	Good	1.06451	In	29	0	NaN
468	DCIP	1	3	3	3	Good	1.06451	In	29	0	NaN
495	Dibromochloropropane	1	3	3	3	Good	1.06451	In	29	0	NaN
535	Didecyldimethylammonium chloride	1	3	3	3	Good	1.06451	In	29	0	NaN
569	Dimethyl disulfide	1	3	3	3	Good	1.06451	In	29	0	NaN
598	Dipotassium phosphonate	1	3	3	3	Good	1.06451	In	29	0	NaN
615	Dodecylphenol ethoxylate	1	3	3	3	Good	1.06451	In	29	0	NaN
616	Dodemorph	1	3	3	3	Good	1.06451	In	29	0	NaN
631	Epichlorohydrin	1	3	3	3	Good	1.06451	In	29	0	NaN
642	Etacelasil	1	3	3	3	Good	1.06451	In	29	0	NaN
650	Ethanethiol	1	3	3	3	Good	1.06451	In	29	0	NaN
651	Ethanol	1	3	3	3	Good	1.06451	In	29	0	NaN
662	Ethohexadiol	1	3	3	3	Good	1.06451	In	29	0	NaN
673	Ethylene dichloride	1	3	3	3	Good	1.06451	In	29	0	NaN
674	Ethylene glycol	1	3	3	3	Good	1.06451	In	29	0	NaN
678	Ethylmercury bromide	1	3	3	3	Good	1.06451	In	29	0	NaN
880	Gliftor	1	3	3	3	Good	1.06451	In	29	0	NaN
884	Glycerin	1	3	3	3	Good	1.06451	In	29	0	NaN
921	Hexylene glycol	1	3	3	3	Good	1.06451	In	29	0	NaN
962	Iodomethane	1	3	3	3	Good	1.06451	In	29	0	NaN
1014	Izopamfos	1	3	3	3	Good	1.06451	In	29	0	NaN
1031	Lime sulphur	1	3	3	3	Good	1.06451	In	29	0	NaN
1033	Lindane	1	3	3	3	Good	1.06451	In	29	0	NaN
1086	Mepiquat	1	3	3	3	Good	1.06451	In	29	0	NaN
1096	Metaldehyde	1	3	3	3	Good	1.06451	In	29	0	NaN
1127	Methyl ether cellulose	1	3	3	3	Good	1.06451	In	29	0	NaN
1154	Mirex	1	3	3	3	Good	1.06451	In	29	0	NaN
1209	Octachlorodipropyl ether	1	3	3	3	Good	1.06451	In	29	0	NaN
1270	Phosphane	1	3	3	3	Good	1.06451	In	29	0	NaN
1334	Propylene glycol	1	3	3	3	Good	1.06451	In	29	0	NaN
1424	Seboctylamine	1	3	3	3	Good	1.06451	In	29	0	NaN
1446	Sodium hexafluorosilicate	1	3	3	3	Good	1.06451	In	29	0	NaN
1454	Sodium tetraborate pentahydrate	1	3	3	3	Good	1.06451	In	29	0	NaN
1456	Sorbitol	1	3	3	3	Good	1.06451	In	29	0	NaN
1464	Spiroxamine	1	3	3	3	Good	1.06451	In	29	0	NaN
1536	Thiocyclam oxalate	1	3	3	3	Good	1.06451	In	29	0	NaN
1549	Tiaojiean	1	3	3	3	Good	1.06451	In	29	0	NaN
1571	Triacontanol	1	3	3	3	Good	1.06451	In	29	0	NaN
1597	Tridemorph	1	3	3	3	Good	1.06451	In	29	0	NaN
1614	Triisopropanolamine	1	3	3	3	Good	1.06451	In	29	0	NaN
1617	Trioxymethylene	1	3	3	3	Good	1.06451	In	29	0	NaN
572	Dimethylvinphos	1	3	3	3	Good	1.06451	In	8	0.279372	0.72093
1511	Tetrachlorvinphos	1	3	3	3	Good	1.06451	In	8	0.279372	0.72093
1501	Terallethrin	1	3	3	3	Good	1.05303	In	8	0.186248	0.741935
1616	Trinexapac-ethyl	1	3	3	3	Good	1.05303	In	8	0.186248	0.741935
249	Butenachlor	1	3	3	3	Good	1.04154	In	12	0.253417	0.695652
288	Carboxin	1	3	3	3	Good	1.04154	In	12	0.253417	0.695652
415	Crotamiton	1	3	3	3	Good	1.04154	In	12	0.253417	0.695652
636	Epsilon-metofluthrin	1	3	3	3	Good	1.04154	In	12	0.253417	0.695652
824	Flupyradifurone	1	3	3	3	Good	1.04154	In	12	0.253417	0.695652
910	Heptafluthrin	1	3	3	3	Good	1.04154	In	12	0.253417	0.695652
1019	Kappa-tefluthrin	1	3	3	3	Good	1.04154	In	12	0.253417	0.695652
1138	Metofluthrin	1	3	3	3	Good	1.04154	In	12	0.253417	0.695652
1307	Profluthrin	1	3	3	3	Good	1.04154	In	12	0.253417	0.695652
1496	Tefluthrin	1	3	3	3	Good	1.04154	In	12	0.253417	0.695652
109	Amiprofos-methyl	1	3	3	3	Good	0.956253	In	30	0.176604	0.84
411	Coumithoate	1	3	3	3	Good	0.956253	In	30	0.176604	0.84
609	Ditalimfos	1	3	3	3	Good	0.956253	In	30	0.176604	0.84
1237	Parathion-ethyl	1	3	3	3	Good	0.956253	In	30	0.176604	0.84
358	Chlorpyrifos	1	3	3	3	Good	0.950515	In	30	0.296174	0.64
494	Diazinon	1	3	3	3	Good	0.950515	In	30	0.296174	0.64
851	Fonofos	1	3	3	3	Good	0.950515	In	30	0.296174	0.64
1289	Pirimiphos-ethyl	1	3	3	3	Good	0.950515	In	30	0.296174	0.64
1540	Thionazin	1	3	3	3	Good	0.950515	In	30	0.296174	0.64
1591	Trichloronate	1	3	3	3	Good	0.950515	In	30	0.296174	0.64
481	Demeton-O-methyl sulfone	1	3	3	3	Good	0.939039	In	5	0.0471405	0.833333
483	Demeton-S-methyl sulfone	1	3	3	3	Good	0.939039	In	5	0.0471405	0.833333
856	Formothion	1	3	3	3	Good	0.939039	In	5	0.0471405	0.833333
1065	Mecarphon	1	3	3	3	Good	0.939039	In	5	0.0471405	0.833333
1108	Methacrifos	1	3	3	3	Good	0.939039	In	5	0.0471405	0.833333
10	1,1,1-acetonitrile	1	3	3	3	Good	0.933301	In	29	0.0420703	0
28	1-octyl-2-pyrrolidone	1	3	3	3	Good	0.933301	In	29	0.0420703	0
43	24-epibrassinolide	1	3	3	3	Good	0.933301	In	29	0.0420703	0
56	ACC	1	3	3	3	Good	0.933301	In	29	0.0420703	0
59	Acetamide	1	3	3	3	Good	0.933301	In	29	0.0420703	0
74	AD-67	1	3	3	3	Good	0.933301	In	29	0.0420703	0
115	Ammonium acetate	1	3	3	3	Good	0.933301	In	29	0.0420703	0
116	Ammonium carbonate	1	3	3	3	Good	0.933301	In	29	0.0420703	0
119	Ammonium thiocyanate	1	3	3	3	Good	0.933301	In	29	0.0420703	0
145	Barium carbonate	1	3	3	3	Good	0.933301	In	29	0.0420703	0
260	Butyl stearate	1	3	3	3	Good	0.933301	In	29	0.0420703	0
261	Butylate	1	3	3	3	Good	0.933301	In	29	0.0420703	0
266	Calcium carbide	1	3	3	3	Good	0.933301	In	29	0.0420703	0
267	Calcium carbonate	1	3	3	3	Good	0.933301	In	29	0.0420703	0
269	Calcium phosphate	1	3	3	3	Good	0.933301	In	29	0.0420703	0
275	Carbamorph	1	3	3	3	Good	0.933301	In	29	0.0420703	0
313	Chlordecone	1	3	3	3	Good	0.933301	In	29	0.0420703	0
336	Chlorine dioxide	1	3	3	3	Good	0.933301	In	29	0.0420703	0
344	Chloropon	1	3	3	3	Good	0.933301	In	29	0.0420703	0
403	Copper II carbonate	1	3	3	3	Good	0.933301	In	29	0.0420703	0
404	Copper naphthenate	1	3	3	3	Good	0.933301	In	29	0.0420703	0
417	Cyanamide	1	3	3	3	Good	0.933301	In	29	0.0420703	0
428	Cycloate	1	3	3	3	Good	0.933301	In	29	0.0420703	0
429	Cyclohexanone	1	3	3	3	Good	0.933301	In	29	0.0420703	0
431	Cycloprate	1	3	3	3	Good	0.933301	In	29	0.0420703	0
437	Cycluron	1	3	3	3	Good	0.933301	In	29	0.0420703	0
465	Dalapon	1	3	3	3	Good	0.933301	In	29	0.0420703	0
467	Dazomet	1	3	3	3	Good	0.933301	In	29	0.0420703	0
493	Diammonium phosphate	1	3	3	3	Good	0.933301	In	29	0.0420703	0
530	Dicopper carbonate dihydroxide	1	3	3	3	Good	0.933301	In	29	0.0420703	0
556	Dimefox	1	3	3	3	Good	0.933301	In	29	0.0420703	0
604	Disodium phosphonate	1	3	3	3	Good	0.933301	In	29	0.0420703	0
617	Dodine	1	3	3	3	Good	0.933301	In	29	0.0420703	0
637	EPTC	1	3	3	3	Good	0.933301	In	29	0.0420703	0
652	Ethephon	1	3	3	3	Good	0.933301	In	29	0.0420703	0
655	Ethiolate	1	3	3	3	Good	0.933301	In	29	0.0420703	0
669	Ethyl butyl nitrosamine	1	3	3	3	Good	0.933301	In	29	0.0420703	0
670	Ethyl formate	1	3	3	3	Good	0.933301	In	29	0.0420703	0
675	Ethylene urea	1	3	3	3	Good	0.933301	In	29	0.0420703	0
743	Ferbam	1	3	3	3	Good	0.933301	In	29	0.0420703	0
745	Ferric phosphate	1	3	3	3	Good	0.933301	In	29	0.0420703	0
807	Fluoroacetamide	1	3	3	3	Good	0.933301	In	29	0.0420703	0
823	Flupropanate	1	3	3	3	Good	0.933301	In	29	0.0420703	0
854	Formaldehyde	1	3	3	3	Good	0.933301	In	29	0.0420703	0
886	Glyodin	1	3	3	3	Good	0.933301	In	29	0.0420703	0
914	Hexachloroacetone	1	3	3	3	Good	0.933301	In	29	0.0420703	0
918	Hexadecanoic acid	1	3	3	3	Good	0.933301	In	29	0.0420703	0
930	Icaridin	1	3	3	3	Good	0.933301	In	29	0.0420703	0
993	Isonoruron	1	3	3	3	Good	0.933301	In	29	0.0420703	0
995	Isopolinate	1	3	3	3	Good	0.933301	In	29	0.0420703	0
998	Isopropyl myristate	1	3	3	3	Good	0.933301	In	29	0.0420703	0
1032	Limestone	1	3	3	3	Good	0.933301	In	29	0.0420703	0
1097	Metam	1	3	3	3	Good	0.933301	In	29	0.0420703	0
1109	Methamidophos	1	3	3	3	Good	0.933301	In	29	0.0420703	0
1128	Methyl isobutyl ketone	1	3	3	3	Good	0.933301	In	29	0.0420703	0
1130	Methyl nonyl ketone	1	3	3	3	Good	0.933301	In	29	0.0420703	0
1157	Molinate	1	3	3	3	Good	0.933301	In	29	0.0420703	0
1173	N,N-dimethyl capramide	1	3	3	3	Good	0.933301	In	29	0.0420703	0
1197	N-methyl-2-pyrrolidone	1	3	3	3	Good	0.933301	In	29	0.0420703	0
1198	N-methylneodecanamide	1	3	3	3	Good	0.933301	In	29	0.0420703	0
1199	N-nitrosodimethylamine	1	3	3	3	Good	0.933301	In	29	0.0420703	0
1203	Noruron	1	3	3	3	Good	0.933301	In	29	0.0420703	0
1240	Pebulate	1	3	3	3	Good	0.933301	In	29	0.0420703	0
1254	Peroxyacetic acid	1	3	3	3	Good	0.933301	In	29	0.0420703	0
1319	Propamocarb	1	3	3	3	Good	0.933301	In	29	0.0420703	0
1329	Propionic acid	1	3	3	3	Good	0.933301	In	29	0.0420703	0
1341	Prothiocarb	1	3	3	3	Good	0.933301	In	29	0.0420703	0
1449	Sodium monochloroacetate	1	3	3	3	Good	0.933301	In	29	0.0420703	0
1450	Sodium monofluoroacetate	1	3	3	3	Good	0.933301	In	29	0.0420703	0
1455	Sodium tetrathiocarbonate	1	3	3	3	Good	0.933301	In	29	0.0420703	0
1465	Strobane	1	3	3	3	Good	0.933301	In	29	0.0420703	0
1484	TCA-ammonium	1	3	3	3	Good	0.933301	In	29	0.0420703	0
1545	Thiourea	1	3	3	3	Good	0.933301	In	29	0.0420703	0
1590	Trichlorfon	1	3	3	3	Good	0.933301	In	29	0.0420703	0
1625	Urea sulphate	1	3	3	3	Good	0.933301	In	29	0.0420703	0
1629	Vernolate	1	3	3	3	Good	0.933301	In	29	0.0420703	0
1631	Vinegar	1	3	3	3	Good	0.933301	In	29	0.0420703	0
345	Chloroprallethrin	1	3	3	3	Good	0.921816	In	8	0.139686	0.806452
950	Imiprothrin	1	3	3	3	Good	0.921816	In	8	0.139686	0.806452
1295	Prallethrin	1	3	3	3	Good	0.921816	In	8	0.139686	0.806452
1300	Prochloraz	1	3	3	3	Good	0.921816	In	8	0.139686	0.806452
1515	Tetramethrin	1	3	3	3	Good	0.921816	In	8	0.139686	0.806452
86	Allyxycarb	1	3	3	3	Good	0.910332	In	12	0.289619	0.666667
233	Brompyrazon	1	3	3	3	Good	0.910332	In	12	0.289619	0.666667
333	Chloridazon	1	3	3	3	Good	0.910332	In	12	0.289619	0.666667
505	Dichlone	1	3	3	3	Good	0.910332	In	12	0.289619	0.666667
525	Diclomezine	1	3	3	3	Good	0.910332	In	12	0.289619	0.666667
574	Dimidazon	1	3	3	3	Good	0.910332	In	12	0.289619	0.666667
810	Fluoroimide	1	3	3	3	Good	0.910332	In	12	0.289619	0.666667
893	Griseofulvin	1	3	3	3	Good	0.910332	In	12	0.289619	0.666667
1201	Norflurazon	1	3	3	3	Good	0.910332	In	12	0.289619	0.666667
1376	Pyridaben	1	3	3	3	Good	0.910332	In	12	0.289619	0.666667
1406	Quinoclamine	1	3	3	3	Good	0.910332	In	12	0.289619	0.666667
978	Isazofos	1	3	3	3	Good	0.813565	In	24	0.167836	0.692308
31	2,2-dibromo-3-nitrilopropionamide	1	3	3	3	Good	0.802089	In	18	0	1
78	Aldicarb	1	3	3	3	Good	0.802089	In	18	0	1
92	Aluminium ammonium sulphate	1	3	3	3	Good	0.802089	In	18	0	1
117	Ammonium sulphamate	1	3	3	3	Good	0.802089	In	18	0	1
118	Ammonium sulphate	1	3	3	3	Good	0.802089	In	18	0	1
138	Azithiram	1	3	3	3	Good	0.802089	In	18	0	1
170	Bentonite	1	3	3	3	Good	0.802089	In	18	0	1
206	Bisthiosemi	1	3	3	3	Good	0.802089	In	18	0	1
207	Bis-trichloromethyl sulfone	1	3	3	3	Good	0.802089	In	18	0	1
236	Bronopol	1	3	3	3	Good	0.802089	In	18	0	1
253	Butocarboxim	1	3	3	3	Good	0.802089	In	18	0	1
265	Calcium acetate	1	3	3	3	Good	0.802089	In	18	0	1
268	Calcium cyanamide	1	3	3	3	Good	0.802089	In	18	0	1
282	Carbon dioxide	1	3	3	3	Good	0.802089	In	18	0	1
283	Carbon disulphide	1	3	3	3	Good	0.802089	In	18	0	1
292	Cartap	1	3	3	3	Good	0.802089	In	18	0	1
343	Chloropicrin	1	3	3	3	Good	0.802089	In	18	0	1
402	Copper II acetate	1	3	3	3	Good	0.802089	In	18	0	1
406	Copper sulphate	1	3	3	3	Good	0.802089	In	18	0	1
466	Daminozide	1	3	3	3	Good	0.802089	In	18	0	1
492	Diammonium ethylenebis (dithiocarbamate)	1	3	3	3	Good	0.802089	In	18	0	1
533	Dicyclonon	1	3	3	3	Good	0.802089	In	18	0	1
573	Dimexano	1	3	3	3	Good	0.802089	In	18	0	1
613	Dixanthogen	1	3	3	3	Good	0.802089	In	18	0	1
626	Endothal	1	3	3	3	Good	0.802089	In	18	0	1
645	Etem	1	3	3	3	Good	0.802089	In	18	0	1
649	Ethanedial	1	3	3	3	Good	0.802089	In	18	0	1
677	Ethylicin	1	3	3	3	Good	0.802089	In	18	0	1
883	Glutaraldehyde	1	3	3	3	Good	0.802089	In	18	0	1
885	Glyceryl distearate	1	3	3	3	Good	0.802089	In	18	0	1
895	Guazatine	1	3	3	3	Good	0.802089	In	18	0	1
896	Gypsum	1	3	3	3	Good	0.802089	In	18	0	1
912	Heptopargil	1	3	3	3	Good	0.802089	In	18	0	1
949	Iminoctadine triacetate	1	3	3	3	Good	0.802089	In	18	0	1
980	Isobornyl thiocyanoacetate	1	3	3	3	Good	0.802089	In	18	0	1
981	Isocarbamid	1	3	3	3	Good	0.802089	In	18	0	1
1021	Kelevan	1	3	3	3	Good	0.802089	In	18	0	1
1035	Lithium perfluorooctane sulfonate	1	3	3	3	Good	0.802089	In	18	0	1
1040	Malic acid	1	3	3	3	Good	0.802089	In	18	0	1
1042	Mancopper	1	3	3	3	Good	0.802089	In	18	0	1
1045	Maneb	1	3	3	3	Good	0.802089	In	18	0	1
1120	Methomyl	1	3	3	3	Good	0.802089	In	18	0	1
1129	Methyl isothiocyanate	1	3	3	3	Good	0.802089	In	18	0	1
1133	Methylene bisthiocyanate	1	3	3	3	Good	0.802089	In	18	0	1
1135	Metiram	1	3	3	3	Good	0.802089	In	18	0	1
1175	Nabam	1	3	3	3	Good	0.802089	In	18	0	1
1185	Nickel bis(dimethyldithiocarbamate)	1	3	3	3	Good	0.802089	In	18	0	1
1312	Prohydrojasmon	1	3	3	3	Good	0.802089	In	18	0	1
1328	Propineb	1	3	3	3	Good	0.802089	In	18	0	1
1423	Schradan	1	3	3	3	Good	0.802089	In	18	0	1
1435	Silica	1	3	3	3	Good	0.802089	In	18	0	1
1453	Sodium silver thiosulphate	1	3	3	3	Good	0.802089	In	18	0	1
1471	Sulfluramid	1	3	3	3	Good	0.802089	In	18	0	1
1477	Sulfuryl fluoride	1	3	3	3	Good	0.802089	In	18	0	1
1479	Sulphuric acid	1	3	3	3	Good	0.802089	In	18	0	1
1485	TCA-ethadyl	1	3	3	3	Good	0.802089	In	18	0	1
1538	Thiofanox	1	3	3	3	Good	0.802089	In	18	0	1
1546	Thiram	1	3	3	3	Good	0.802089	In	18	0	1
1554	Tirpate	1	3	3	3	Good	0.802089	In	18	0	1
1555	Titanium dioxide	1	3	3	3	Good	0.802089	In	18	0	1
1613	Triforine	1	3	3	3	Good	0.802089	In	18	0	1
1639	Zineb	1	3	3	3	Good	0.802089	In	18	0	1
730	Fenridazon	1	3	3	3	Good	0.779119	In	12	0.325822	0.64
731	Fenridazon-propyl	1	3	3	3	Good	0.779119	In	12	0.325822	0.64
820	Flupropacil	1	3	3	3	Good	0.779119	In	12	0.325822	0.64
1231	Oxycarboxin	1	3	3	3	Good	0.779119	In	12	0.325822	0.64
1408	Quinonamid	1	3	3	3	Good	0.779119	In	12	0.325822	0.64
621	Edifenphos	1	3	3	3	Good	0.699566	In	30	0.132453	0.892857
630	EPBP	1	3	3	3	Good	0.699566	In	30	0.132453	0.892857
1265	Phosdiphen	1	3	3	3	Good	0.699566	In	30	0.132453	0.892857
354	Chlorphoxim	1	3	3	3	Good	0.68809	In	30	0.220755	0.72
489	Dialifos	1	3	3	3	Good	0.68809	In	30	0.220755	0.72
1271	Phoxim	1	3	3	3	Good	0.68809	In	30	0.220755	0.72
227	Bromophos	1	3	3	3	Good	0.682352	In	24	0.159223	0.769231
285	Carbophenothion	1	3	3	3	Good	0.682352	In	24	0.159223	0.769231
491	Diamidaphos	1	3	3	3	Good	0.682352	In	24	0.159223	0.769231
593	Dioxabenzophos	1	3	3	3	Good	0.682352	In	24	0.159223	0.769231
697	Fenchlorphos	1	3	3	3	Good	0.682352	In	24	0.159223	0.769231
961	Iodofenphos	1	3	3	3	Good	0.682352	In	24	0.159223	0.769231
1015	Jiajizengxiaolin	1	3	3	3	Good	0.682352	In	24	0.159223	0.769231
1257	Phenkapton	1	3	3	3	Good	0.682352	In	24	0.159223	0.769231
1556	Tolclofos-methyl	1	3	3	3	Good	0.682352	In	24	0.159223	0.769231
1557	Tolfenpyrad	1	3	3	3	Good	0.682352	In	24	0.159223	0.769231
94	Ametridione	1	3	3	3	Good	0.670876	In	34	0	1
96	Amibuzin	1	3	3	3	Good	0.670876	In	34	0	1
97	Amicarbazone	1	3	3	3	Good	0.670876	In	34	0	1
430	Cycloheximide	1	3	3	3	Good	0.670876	In	34	0	1
589	Dinotefuran	1	3	3	3	Good	0.670876	In	34	0	1
633	Epocholeone	1	3	3	3	Good	0.670876	In	34	0	1
657	Ethiozin	1	3	3	3	Good	0.670876	In	34	0	1
920	Hexazinone	1	3	3	3	Good	0.670876	In	34	0	1
999	Isoprothiolane	1	3	3	3	Good	0.670876	In	34	0	1
1037	Lythidathion	1	3	3	3	Good	0.670876	In	34	0	1
1046	Mazidox	1	3	3	3	Good	0.670876	In	34	0	1
1113	Methidathion	1	3	3	3	Good	0.670876	In	34	0	1
1146	Metribuzin	1	3	3	3	Good	0.670876	In	34	0	1
1190	Nithiazine	1	3	3	3	Good	0.670876	In	34	0	1
1193	Nitrilacarb	1	3	3	3	Good	0.670876	In	34	0	1
1222	Oxamyl	1	3	3	3	Good	0.670876	In	34	0	1
1348	Pydanon	1	3	3	3	Good	0.670876	In	34	0	1
44	2-allyphenol	1	3	3	3	Good	0.659391	In	8	0.046562	0.935484
667	Ethoxyquin	1	3	3	3	Good	0.659391	In	8	0.046562	0.935484
1436	Silthiofam	1	3	3	3	Good	0.659391	In	8	0.046562	0.935484
372	Cinidon-ethyl	1	3	3	3	Good	0.647906	In	12	0.362024	0.615385
1223	Oxapyrazon	1	3	3	3	Good	0.647906	In	12	0.362024	0.615385
1548	Tiafenacil	1	3	3	3	Good	0.647906	In	12	0.362024	0.615385
1262	Phosacetim	1	3	3	3	Good	0.568354	In	30	0.139618	0.862069
1353	Pyraclofos	1	3	3	3	Good	0.562616	In	30	0.0441511	0.96
1409	Quinothion	1	3	3	3	Good	0.562616	In	30	0.0441511	0.96
420	Cyanophos	1	3	3	3	Good	0.55114	In	24	0.167836	0.714286
982	Isocarbophos	1	3	3	3	Good	0.55114	In	24	0.167836	0.714286
1260	Phenthoate	1	3	3	3	Good	0.55114	In	24	0.167836	0.714286
1263	Phosalone	1	3	3	3	Good	0.55114	In	24	0.167836	0.714286
80	Aldoxycarb	1	3	3	3	Good	0.539664	In	34	0.0451754	0.75
204	Bismerthiazol	1	3	3	3	Good	0.539664	In	34	0.0451754	0.75
256	Butoxycarboxim	1	3	3	3	Good	0.539664	In	34	0.0451754	0.75
447	Cymoxanil	1	3	3	3	Good	0.539664	In	34	0.0451754	0.75
676	Ethylenediamine tetraacetic acid	1	3	3	3	Good	0.539664	In	34	0.0451754	0.75
992	Isomethiozin	1	3	3	3	Good	0.539664	In	34	0.0451754	0.75
1017	Kaolin	1	3	3	3	Good	0.539664	In	34	0.0451754	0.75
1311	Prohexadione	1	3	3	3	Good	0.539664	In	34	0.0451754	0.75
1445	Sodium ferric EDTA	1	3	3	3	Good	0.539664	In	34	0.0451754	0.75
1535	Thiocyclam	1	3	3	3	Good	0.539664	In	34	0.0451754	0.75
1537	Thiodicarb	1	3	3	3	Good	0.539664	In	34	0.0451754	0.75
1544	Thiosultap	1	3	3	3	Good	0.539664	In	34	0.0451754	0.75
237	Brucine	1	3	3	3	Good	0.528179	In	8	0	1
555	Dimefluthrin	1	3	3	3	Good	0.528179	In	8	0	1
568	Dimethrin	1	3	3	3	Good	0.528179	In	8	0	1
700	Fenfluthrin	1	3	3	3	Good	0.528179	In	8	0	1
782	Fluensulfone	1	3	3	3	Good	0.528179	In	8	0	1
1083	Meperfluthrin	1	3	3	3	Good	0.528179	In	8	0	1
1255	Pethoxamid	1	3	3	3	Good	0.528179	In	8	0	1
1283	Piperonyl cyclonene	1	3	3	3	Good	0.528179	In	8	0	1
1352	Pyracarbolid	1	3	3	3	Good	0.528179	In	8	0	1
1416	Renofluthrin	1	3	3	3	Good	0.528179	In	8	0	1
1457	Spidoxamat	1	3	3	3	Good	0.528179	In	8	0	1
1568	Transfluthrin	1	3	3	3	Good	0.528179	In	8	0	1
578	Diniconazole	1	3	3	3	Good	0.516694	In	27	0.366484	0.696429
579	Diniconazole-M	1	3	3	3	Good	0.516694	In	27	0.366484	0.696429
582	Dinocap	1	3	3	3	Good	0.516694	In	27	0.366484	0.696429
1088	Meptyldinocap	1	3	3	3	Good	0.516694	In	27	0.366484	0.696429
1420	Saflufenacil	1	3	3	3	Good	0.516694	In	27	0.366484	0.696429
1624	Uniconazole	1	3	3	3	Good	0.516694	In	27	0.366484	0.696429
632	EPN	1	3	3	3	Good	0.437141	In	30	0.159189	0.833333
958	Inezin	1	3	3	3	Good	0.431403	In	30	0	1
1030	Leptophos	1	3	3	3	Good	0.431403	In	30	0	1
355	Chlorprazophos	1	3	3	3	Good	0.425665	In	30	0.159189	0.8
135	Azinphos-ethyl	1	3	3	3	Good	0.419927	In	24	0.191363	0.666667
366	Chlorthion	1	3	3	3	Good	0.419927	In	24	0.191363	0.666667
704	Fenitrothion	1	3	3	3	Good	0.419927	In	24	0.191363	0.666667
1238	Parathion-methyl	1	3	3	3	Good	0.419927	In	24	0.191363	0.666667
1268	Phosnichlor	1	3	3	3	Good	0.419927	In	24	0.191363	0.666667
359	Chlorpyrifos-methyl	1	3	3	3	Good	0.414189	In	24	0	1
683	Etrimfos	1	3	3	3	Good	0.414189	In	24	0	1
861	Fospirate	1	3	3	3	Good	0.414189	In	24	0	1
1081	Menazon	1	3	3	3	Good	0.414189	In	24	0	1
1290	Pirimiphos-methyl	1	3	3	3	Good	0.414189	In	24	0	1
114	Amitrole	1	3	3	3	Good	0.408451	In	34	0.0903508	0.6
682	Etridiazole	1	3	3	3	Good	0.408451	In	34	0.0903508	0.6
868	Furalane	1	3	3	3	Good	0.408451	In	34	0.0903508	0.6
193	Bicyclopyrone	1	3	3	3	Good	0.396966	In	8	0.046562	0.939394
435	Cycloxaprid	1	3	3	3	Good	0.396966	In	8	0.046562	0.939394
874	Furethrin	1	3	3	3	Good	0.396966	In	8	0.046562	0.939394
960	Iodobonil	1	3	3	3	Good	0.396966	In	8	0.046562	0.939394
1041	Malonoben	1	3	3	3	Good	0.396966	In	8	0.046562	0.939394
1158	Momfluorothrin	1	3	3	3	Good	0.396966	In	8	0.046562	0.939394
1251	Pentoxazone	1	3	3	3	Good	0.396966	In	8	0.046562	0.939394
1308	Profoxydim	1	3	3	3	Good	0.396966	In	8	0.046562	0.939394
1379	Pyridafol	1	3	3	3	Good	0.396966	In	8	0.046562	0.939394
1459	Spirobudifen	1	3	3	3	Good	0.396966	In	8	0.046562	0.939394
1460	Spirodiclofen	1	3	3	3	Good	0.396966	In	8	0.046562	0.939394
1461	Spiromesifen	1	3	3	3	Good	0.396966	In	8	0.046562	0.939394
1462	Spiropidion	1	3	3	3	Good	0.396966	In	8	0.046562	0.939394
1463	Spirotetramat	1	3	3	3	Good	0.396966	In	8	0.046562	0.939394
1563	Tralkoxydim	1	3	3	3	Good	0.396966	In	8	0.046562	0.939394
1605	Trifluenfuronate	1	3	3	3	Good	0.396966	In	8	0.046562	0.939394
1630	Vinclozolin	1	3	3	3	Good	0.396966	In	8	0.046562	0.939394
1176	Naftalofos	1	3	3	3	Good	0.30019	In	30	0.0441511	0.961538
1013	Isoxathion	1	3	3	3	Good	0.294452	In	30	0.139618	0.84
1367	Pyrazophos	1	3	3	3	Good	0.294452	In	30	0.139618	0.84
1402	Quinalphos	1	3	3	3	Good	0.294452	In	30	0.139618	0.84
123	Anilofos	1	3	3	3	Good	0.282976	In	24	0.0530745	0.909091
378	Clacyfos	1	3	3	3	Good	0.282976	In	24	0.0530745	0.909091
34	2,4,5-trichlorophenol	1	3	3	3	Good	0.277238	In	28	0.0489116	0.857143
40	2,4-dimethylphenol	1	3	3	3	Good	0.277238	In	28	0.0489116	0.857143
54	4-aminopyridine	1	3	3	3	Good	0.277238	In	28	0.0489116	0.857143
95	Ametryn	1	3	3	3	Good	0.277238	In	28	0.0489116	0.857143
129	Atraton	1	3	3	3	Good	0.277238	In	28	0.0489116	0.857143
130	Atrazine	1	3	3	3	Good	0.277238	In	28	0.0489116	0.857143
250	Buthidazole	1	3	3	3	Good	0.277238	In	28	0.0489116	0.857143
287	Carboxazole	1	3	3	3	Good	0.277238	In	28	0.0489116	0.857143
307	Chlorazine	1	3	3	3	Good	0.277238	In	28	0.0489116	0.857143
341	Chloroneb	1	3	3	3	Good	0.277238	In	28	0.0489116	0.857143
348	Chlorotoluene	1	3	3	3	Good	0.277238	In	28	0.0489116	0.857143
351	Chloroxylenol	1	3	3	3	Good	0.277238	In	28	0.0489116	0.857143
373	Cinmethylin	1	3	3	3	Good	0.277238	In	28	0.0489116	0.857143
414	Crimidine	1	3	3	3	Good	0.277238	In	28	0.0489116	0.857143
424	Cybutryne	1	3	3	3	Good	0.277238	In	28	0.0489116	0.857143
454	Cyprazine	1	3	3	3	Good	0.277238	In	28	0.0489116	0.857143
462	Cyromazine	1	3	3	3	Good	0.277238	In	28	0.0489116	0.857143
486	Desmetryn	1	3	3	3	Good	0.277238	In	28	0.0489116	0.857143
561	Dimethametryn	1	3	3	3	Good	0.277238	In	28	0.0489116	0.857143
562	Dimethenamid	1	3	3	3	Good	0.277238	In	28	0.0489116	0.857143
563	Dimethenamid-P	1	3	3	3	Good	0.277238	In	28	0.0489116	0.857143
600	Dipropetryn	1	3	3	3	Good	0.277238	In	28	0.0489116	0.857143
620	Ecolyst	1	3	3	3	Good	0.277238	In	28	0.0489116	0.857143
634	Epofenonane	1	3	3	3	Good	0.277238	In	28	0.0489116	0.857143
666	Ethoxylated p-nonylphenol	1	3	3	3	Good	0.277238	In	28	0.0489116	0.857143
724	Fenpropidin	1	3	3	3	Good	0.277238	In	28	0.0489116	0.857143
725	Fenpropimorph	1	3	3	3	Good	0.277238	In	28	0.0489116	0.857143
875	Furfural	1	3	3	3	Good	0.277238	In	28	0.0489116	0.857143
876	Furilazole	1	3	3	3	Good	0.277238	In	28	0.0489116	0.857143
877	Furmecyclox	1	3	3	3	Good	0.277238	In	28	0.0489116	0.857143
915	Hexachlorobenzene	1	3	3	3	Good	0.277238	In	28	0.0489116	0.857143
927	Hydroquinone	1	3	3	3	Good	0.277238	In	28	0.0489116	0.857143
968	Ipazine	1	3	3	3	Good	0.277238	In	28	0.0489116	0.857143
990	Isolan	1	3	3	3	Good	0.277238	In	28	0.0489116	0.857143
1005	Isouron	1	3	3	3	Good	0.277238	In	28	0.0489116	0.857143
1122	Methoprotryne	1	3	3	3	Good	0.277238	In	28	0.0489116	0.857143
1192	Nitrapyrin	1	3	3	3	Good	0.277238	In	28	0.0489116	0.857143
1202	Nornicotine	1	3	3	3	Good	0.277238	In	28	0.0489116	0.857143
1248	Pentachlorophenol	1	3	3	3	Good	0.277238	In	28	0.0489116	0.857143
1282	Piperonyl butoxide	1	3	3	3	Good	0.277238	In	28	0.0489116	0.857143
1287	Piprotal	1	3	3	3	Good	0.277238	In	28	0.0489116	0.857143
1292	P-nonylphenol	1	3	3	3	Good	0.277238	In	28	0.0489116	0.857143
1315	Prometon	1	3	3	3	Good	0.277238	In	28	0.0489116	0.857143
1316	Prometryn	1	3	3	3	Good	0.277238	In	28	0.0489116	0.857143
1324	Propazine	1	3	3	3	Good	0.277238	In	28	0.0489116	0.857143
1393	Pyripropanol	1	3	3	3	Good	0.277238	In	28	0.0489116	0.857143
1425	Sebuthylazine	1	3	3	3	Good	0.277238	In	28	0.0489116	0.857143
1426	Secbumeton	1	3	3	3	Good	0.277238	In	28	0.0489116	0.857143
1429	Sesamex	1	3	3	3	Good	0.277238	In	28	0.0489116	0.857143
1434	Silatrane	1	3	3	3	Good	0.277238	In	28	0.0489116	0.857143
1437	Simazine	1	3	3	3	Good	0.277238	In	28	0.0489116	0.857143
1439	Simeton	1	3	3	3	Good	0.277238	In	28	0.0489116	0.857143
1440	Simetryn	1	3	3	3	Good	0.277238	In	28	0.0489116	0.857143
1492	Tebuthiuron	1	3	3	3	Good	0.277238	In	28	0.0489116	0.857143
1506	Terbumeton	1	3	3	3	Good	0.277238	In	28	0.0489116	0.857143
1507	Terbuthylazine	1	3	3	3	Good	0.277238	In	28	0.0489116	0.857143
1508	Terbutryn	1	3	3	3	Good	0.277238	In	28	0.0489116	0.857143
1525	Thiazafluron	1	3	3	3	Good	0.277238	In	28	0.0489116	0.857143
1598	Tridiphane	1	3	3	3	Good	0.277238	In	28	0.0489116	0.857143
1599	Trietazine	1	3	3	3	Good	0.277238	In	28	0.0489116	0.857143
1635	Xylene	1	3	3	3	Good	0.277238	In	28	0.0489116	0.857143
58	Acequinocyl	1	3	3	3	Good	0.265753	In	8	0.093124	0.885714
258	Butroxydim	1	3	3	3	Good	0.265753	In	8	0.093124	0.885714
385	Clofencet	1	3	3	3	Good	0.265753	In	8	0.093124	0.885714
461	Cypyrafluone	1	3	3	3	Good	0.265753	In	8	0.093124	0.885714
726	Fenpyrazamine	1	3	3	3	Good	0.265753	In	8	0.093124	0.885714
1299	Probenazole	1	3	3	3	Good	0.265753	In	8	0.093124	0.885714
196	Bifenthrin	1	3	3	3	Good	0.254268	In	27	0.366484	0.706897
544	Difenopenten	1	3	3	3	Good	0.254268	In	27	0.366484	0.706897
545	Difenopenten-ethyl	1	3	3	3	Good	0.254268	In	27	0.366484	0.706897
1018	Kappa-bifenthrin	1	3	3	3	Good	0.254268	In	27	0.366484	0.706897
619	Dufulin	1	3	3	3	Good	0.174716	In	30	0.220755	0.78125
1	(4-chlorophenoxy)acetic acid	1	3	3	3	Good	0.146026	In	28	0	1
15	1,2-benzisothiazolin-3-one	1	3	3	3	Good	0.146026	In	28	0	1
32	2,3,5-tri-iodobenzoic acid	1	3	3	3	Good	0.146026	In	28	0	1
33	2,3,6-TBA	1	3	3	3	Good	0.146026	In	28	0	1
35	2,4,5-trichlorophenoxyacetic acid	1	3	3	3	Good	0.146026	In	28	0	1
36	2,4-D	1	3	3	3	Good	0.146026	In	28	0	1
37	2,4-DB	1	3	3	3	Good	0.146026	In	28	0	1
38	2,4-D-dimethylammonium	1	3	3	3	Good	0.146026	In	28	0	1
41	2,5-dichlorobenzoic acid methyl ester	1	3	3	3	Good	0.146026	In	28	0	1
62	Acetochlor	1	3	3	3	Good	0.146026	In	28	0	1
76	Alachlor	1	3	3	3	Good	0.146026	In	28	0	1
103	Aminocarb	1	3	3	3	Good	0.146026	In	28	0	1
104	Aminocyclopyrachlor	1	3	3	3	Good	0.146026	In	28	0	1
105	Aminocyclopyrachlor-methyl	1	3	3	3	Good	0.146026	In	28	0	1
106	Aminopyralid	1	3	3	3	Good	0.146026	In	28	0	1
107	Aminopyralid-dimethylammonium	1	3	3	3	Good	0.146026	In	28	0	1
125	Aramite	1	3	3	3	Good	0.146026	In	28	0	1
154	Bendiocarb	1	3	3	3	Good	0.146026	In	28	0	1
160	Benoxacor	1	3	3	3	Good	0.146026	In	28	0	1
182	Benzoic acid	1	3	3	3	Good	0.146026	In	28	0	1
212	Bixlozone	1	3	3	3	Good	0.146026	In	28	0	1
223	Bromobutide	1	3	3	3	Good	0.146026	In	28	0	1
230	Bromoxynil	1	3	3	3	Good	0.146026	In	28	0	1
235	Bromuron	1	3	3	3	Good	0.146026	In	28	0	1
238	Bucarpolate	1	3	3	3	Good	0.146026	In	28	0	1
239	Bufencarb	1	3	3	3	Good	0.146026	In	28	0	1
243	Butachlor	1	3	3	3	Good	0.146026	In	28	0	1
276	Carbanolate	1	3	3	3	Good	0.146026	In	28	0	1
281	Carbofuran	1	3	3	3	Good	0.146026	In	28	0	1
286	Carbosulfan	1	3	3	3	Good	0.146026	In	28	0	1
291	Carpropamid	1	3	3	3	Good	0.146026	In	28	0	1
295	Chlobenthiazone	1	3	3	3	Good	0.146026	In	28	0	1
299	Chloramben	1	3	3	3	Good	0.146026	In	28	0	1
300	Chloramben-ammonium	1	3	3	3	Good	0.146026	In	28	0	1
301	Chloraniformethan	1	3	3	3	Good	0.146026	In	28	0	1
310	Chlorbromuron	1	3	3	3	Good	0.146026	In	28	0	1
314	Chlordimeform	1	3	3	3	Good	0.146026	In	28	0	1
317	Chloreturon	1	3	3	3	Good	0.146026	In	28	0	1
318	Chlorfenac	1	3	3	3	Good	0.146026	In	28	0	1
322	Chlorfenprop	1	3	3	3	Good	0.146026	In	28	0	1
323	Chlorfenprop-methyl	1	3	3	3	Good	0.146026	In	28	0	1
349	Chlorotoluron	1	3	3	3	Good	0.146026	In	28	0	1
352	Chloroxynil	1	3	3	3	Good	0.146026	In	28	0	1
357	Chlorpropham	1	3	3	3	Good	0.146026	In	28	0	1
365	Chlorthiamid	1	3	3	3	Good	0.146026	In	28	0	1
376	Cisanilide	1	3	3	3	Good	0.146026	In	28	0	1
381	Cliodinate	1	3	3	3	Good	0.146026	In	28	0	1
384	Cloethocarb	1	3	3	3	Good	0.146026	In	28	0	1
387	Clofibric acid	1	3	3	3	Good	0.146026	In	28	0	1
390	Clomazone	1	3	3	3	Good	0.146026	In	28	0	1
392	Cloprop	1	3	3	3	Good	0.146026	In	28	0	1
394	Clopyralid	1	3	3	3	Good	0.146026	In	28	0	1
395	Clopyralid-olamine	1	3	3	3	Good	0.146026	In	28	0	1
399	Cloxyfonac	1	3	3	3	Good	0.146026	In	28	0	1
418	Cyanatryn	1	3	3	3	Good	0.146026	In	28	0	1
419	Cyanazine	1	3	3	3	Good	0.146026	In	28	0	1
459	Cypromid	1	3	3	3	Good	0.146026	In	28	0	1
473	Defenuron	1	3	3	3	Good	0.146026	In	28	0	1
475	Delachlor	1	3	3	3	Good	0.146026	In	28	0	1
497	Dicamba	1	3	3	3	Good	0.146026	In	28	0	1
498	Dicamba diglycolamine	1	3	3	3	Good	0.146026	In	28	0	1
499	Dicamba diolamine	1	3	3	3	Good	0.146026	In	28	0	1
500	Dicamba methyl	1	3	3	3	Good	0.146026	In	28	0	1
501	Dichlobenil	1	3	3	3	Good	0.146026	In	28	0	1
508	Dichlorprop	1	3	3	3	Good	0.146026	In	28	0	1
509	Dichlorprop-butotyl	1	3	3	3	Good	0.146026	In	28	0	1
510	Dichlorprop-dimethylammonium	1	3	3	3	Good	0.146026	In	28	0	1
511	Dichlorprop-isoctyl	1	3	3	3	Good	0.146026	In	28	0	1
512	Dichlorprop-methyl	1	3	3	3	Good	0.146026	In	28	0	1
513	Dichlorprop-P	1	3	3	3	Good	0.146026	In	28	0	1
514	Dichlorprop-P-etexyl	1	3	3	3	Good	0.146026	In	28	0	1
515	Dichlorprop-isoctyl	1	3	3	3	Good	0.146026	In	28	0	1
516	Dichlorprop-methyl	1	3	3	3	Good	0.146026	In	28	0	1
517	Dichlorprop-P	1	3	3	3	Good	0.146026	In	28	0	1
518	Dichlorprop-P-etexyl	1	3	3	3	Good	0.146026	In	28	0	1
539	Diethofencarb	1	3	3	3	Good	0.146026	In	28	0	1
541	Diethyltoluamide	1	3	3	3	Good	0.146026	In	28	0	1
558	Dimepiperate	1	3	3	3	Good	0.146026	In	28	0	1
560	Dimethachlor	1	3	3	3	Good	0.146026	In	28	0	1
571	Dimethyl(4-piperidinocarbonyloxy-2,5-xylyl)sulfonium toluene-4-sulfonate	1	3	3	3	Good	0.146026	In	28	0	1
612	Diuron	1	3	3	3	Good	0.146026	In	28	0	1
622	Eglinazine	1	3	3	3	Good	0.146026	In	28	0	1
623	Eglinazine-ethyl	1	3	3	3	Good	0.146026	In	28	0	1
639	Erbon	1	3	3	3	Good	0.146026	In	28	0	1
641	Esprocarb	1	3	3	3	Good	0.146026	In	28	0	1
654	Ethiofencarb	1	3	3	3	Good	0.146026	In	28	0	1
699	Fenethacarb	1	3	3	3	Good	0.146026	In	28	0	1
702	Fenhexamid	1	3	3	3	Good	0.146026	In	28	0	1
706	Fenobucarb	1	3	3	3	Good	0.146026	In	28	0	1
707	Fenoprop	1	3	3	3	Good	0.146026	In	28	0	1
708	Fenoprop-butometyl	1	3	3	3	Good	0.146026	In	28	0	1
709	Fenoprop-butotyl	1	3	3	3	Good	0.146026	In	28	0	1
710	Fenoprop-butyl	1	3	3	3	Good	0.146026	In	28	0	1
711	Fenoprop-isoctyl	1	3	3	3	Good	0.146026	In	28	0	1
712	Fenoprop-methyl	1	3	3	3	Good	0.146026	In	28	0	1
713	Fenothiocarb	1	3	3	3	Good	0.146026	In	28	0	1
740	Fenuron	1	3	3	3	Good	0.146026	In	28	0	1
741	Fenuron-TCA	1	3	3	3	Good	0.146026	In	28	0	1
774	Fluchloraminopyr	1	3	3	3	Good	0.146026	In	28	0	1
775	Fluchloraminopyr-tefuryl	1	3	3	3	Good	0.146026	In	28	0	1
801	Fluometuron	1	3	3	3	Good	0.146026	In	28	0	1
813	Fluothiuron	1	3	3	3	Good	0.146026	In	28	0	1
818	Flupentiofenox	1	3	3	3	Good	0.146026	In	28	0	1
821	Flupropadine	1	3	3	3	Good	0.146026	In	28	0	1
822	Flupropadine hydrochloride	1	3	3	3	Good	0.146026	In	28	0	1
833	Flurochloridone	1	3	3	3	Good	0.146026	In	28	0	1
834	Fluroxypyr	1	3	3	3	Good	0.146026	In	28	0	1
835	Fluroxypyr-meptyl	1	3	3	3	Good	0.146026	In	28	0	1
848	Fluxofenim	1	3	3	3	Good	0.146026	In	28	0	1
929	Hyquincarb	1	3	3	3	Good	0.146026	In	28	0	1
966	Ioxynil	1	3	3	3	Good	0.146026	In	28	0	1
996	Isoprocarb	1	3	3	3	Good	0.146026	In	28	0	1
1000	Isoproturon	1	3	3	3	Good	0.146026	In	28	0	1
1034	Linuron	1	3	3	3	Good	0.146026	In	28	0	1
1047	MCPA	1	3	3	3	Good	0.146026	In	28	0	1
1048	MCPA-butotyl	1	3	3	3	Good	0.146026	In	28	0	1
1049	MCPA-butyl	1	3	3	3	Good	0.146026	In	28	0	1
1050	MCPA-dimethylammonium	1	3	3	3	Good	0.146026	In	28	0	1
1051	MCPA-diolamine	1	3	3	3	Good	0.146026	In	28	0	1
1052	MCPA-etexyl	1	3	3	3	Good	0.146026	In	28	0	1
1053	MCPA-ethyl	1	3	3	3	Good	0.146026	In	28	0	1
1054	MCPA-isobutyl	1	3	3	3	Good	0.146026	In	28	0	1
1055	MCPA-isoctyl	1	3	3	3	Good	0.146026	In	28	0	1
1056	MCPA-isopropyl	1	3	3	3	Good	0.146026	In	28	0	1
1057	MCPA-methyl	1	3	3	3	Good	0.146026	In	28	0	1
1058	MCPA-olamine	1	3	3	3	Good	0.146026	In	28	0	1
1059	MCPA-thioethyl	1	3	3	3	Good	0.146026	In	28	0	1
1060	MCPB	1	3	3	3	Good	0.146026	In	28	0	1
1061	M-cumenyl methylcarbamate	1	3	3	3	Good	0.146026	In	28	0	1
1066	Mecoprop	1	3	3	3	Good	0.146026	In	28	0	1
1067	Mecoprop dimethylammonium	1	3	3	3	Good	0.146026	In	28	0	1
1068	Mecoprop etexyl	1	3	3	3	Good	0.146026	In	28	0	1
1069	Mecoprop methyl	1	3	3	3	Good	0.146026	In	28	0	1
1070	Mecoprop trolamine	1	3	3	3	Good	0.146026	In	28	0	1
1071	Mecoprop-P etexyl	1	3	3	3	Good	0.146026	In	28	0	1
1072	Mecoprop-P isobutyl	1	3	3	3	Good	0.146026	In	28	0	1
1084	Mephenate	1	3	3	3	Good	0.146026	In	28	0	1
1114	Methiocarb	1	3	3	3	Good	0.146026	In	28	0	1
1118	Methiuron	1	3	3	3	Good	0.146026	In	28	0	1
1137	Metobromuron	1	3	3	3	Good	0.146026	In	28	0	1
1139	Metolachlor	1	3	3	3	Good	0.146026	In	28	0	1
1140	Metolcarb	1	3	3	3	Good	0.146026	In	28	0	1
1144	Metoxuron	1	3	3	3	Good	0.146026	In	28	0	1
1152	Mexacarbate	1	3	3	3	Good	0.146026	In	28	0	1
1159	Monalide	1	3	3	3	Good	0.146026	In	28	0	1
1161	Monolinuron	1	3	3	3	Good	0.146026	In	28	0	1
1164	Monuron	1	3	3	3	Good	0.146026	In	28	0	1
1184	Neburon	1	3	3	3	Good	0.146026	In	28	0	1
1214	Orbencarb	1	3	3	3	Good	0.146026	In	28	0	1
1235	Parafluron	1	3	3	3	Good	0.146026	In	28	0	1
1249	Pentanochlor	1	3	3	3	Good	0.146026	In	28	0	1
1272	Phthalide	1	3	3	3	Good	0.146026	In	28	0	1
1274	Picloram	1	3	3	3	Good	0.146026	In	28	0	1
1275	Picloram-isoctyl	1	3	3	3	Good	0.146026	In	28	0	1
1276	Picloram-methyl	1	3	3	3	Good	0.146026	In	28	0	1
1281	Piperalin	1	3	3	3	Good	0.146026	In	28	0	1
1284	Piperonyl sulfoxide	1	3	3	3	Good	0.146026	In	28	0	1
1288	Pirimicarb	1	3	3	3	Good	0.146026	In	28	0	1
1291	Plifenate	1	3	3	3	Good	0.146026	In	28	0	1
1301	Procyazine	1	3	3	3	Good	0.146026	In	28	0	1
1309	Proglinazine	1	3	3	3	Good	0.146026	In	28	0	1
1310	Proglinazine-ethyl	1	3	3	3	Good	0.146026	In	28	0	1
1314	Promecarb	1	3	3	3	Good	0.146026	In	28	0	1
1317	Propachlor	1	3	3	3	Good	0.146026	In	28	0	1
1320	Propanil	1	3	3	3	Good	0.146026	In	28	0	1
1326	Propham	1	3	3	3	Good	0.146026	In	28	0	1
1330	Propisochlor	1	3	3	3	Good	0.146026	In	28	0	1
1331	Propoxur	1	3	3	3	Good	0.146026	In	28	0	1
1338	Prosulfocarb	1	3	3	3	Good	0.146026	In	28	0	1
1358	Pyramat	1	3	3	3	Good	0.146026	In	28	0	1
1364	Pyrazachlor	1	3	3	3	Good	0.146026	In	28	0	1
1397	Pyroquilon	1	3	3	3	Good	0.146026	In	28	0	1
1428	Semiamitraz hydrochloride	1	3	3	3	Good	0.146026	In	28	0	1
1432	Siduron	1	3	3	3	Good	0.146026	In	28	0	1
1443	S-metolachlor	1	3	3	3	Good	0.146026	In	28	0	1
1482	Swep	1	3	3	3	Good	0.146026	In	28	0	1
1491	Tebutam	1	3	3	3	Good	0.146026	In	28	0	1
1503	Terbucarb	1	3	3	3	Good	0.146026	In	28	0	1
1504	Terbuchlor	1	3	3	3	Good	0.146026	In	28	0	1
1516	Tetramethylfluthrin	1	3	3	3	Good	0.146026	In	28	0	1
1551	Tiocarbazil	1	3	3	3	Good	0.146026	In	28	0	1
1567	Trans-flurochloridone	1	3	3	3	Good	0.146026	In	28	0	1
1581	Triazamate	1	3	3	3	Good	0.146026	In	28	0	1
1588	Tricamba	1	3	3	3	Good	0.146026	In	28	0	1
1589	Trichlamide	1	3	3	3	Good	0.146026	In	28	0	1
1592	Triclopyr	1	3	3	3	Good	0.146026	In	28	0	1
1593	Triclopyr-butotyl	1	3	3	3	Good	0.146026	In	28	0	1
1595	Triclopyr-triethylammonium	1	3	3	3	Good	0.146026	In	28	0	1
1615	Trimethacarb	1	3	3	3	Good	0.146026	In	28	0	1
1623	Umifoxolaner	1	3	3	3	Good	0.146026	In	28	0	1
1628	Verbutin	1	3	3	3	Good	0.146026	In	28	0	1
1633	XMC	1	3	3	3	Good	0.146026	In	28	0	1
1634	Xylachlor	1	3	3	3	Good	0.146026	In	28	0	1
1636	Xylylcarb	1	3	3	3	Good	0.146026	In	28	0	1
795	Flumetylsulforim	1	3	3	3	Good	0.134541	In	27	0.0968719	0.902439
1022	Ketospiradox	1	3	3	3	Good	0.134541	In	27	0.0968719	0.902439
1027	Lancotrione	1	3	3	3	Good	0.134541	In	27	0.0968719	0.902439
1363	Pyrasulfotole	1	3	3	3	Good	0.134541	In	27	0.0968719	0.902439
445	Cyhalothrin	1	3	3	3	Good	0.123056	In	27	0.375964	0.683333
879	Gamma-cyhalothrin	1	3	3	3	Good	0.123056	In	27	0.375964	0.683333
1026	Lambda-cyhalothrin	1	3	3	3	Good	0.123056	In	27	0.375964	0.683333
1411	Quintiofos	1	3	3	3	Good	0.043503	In	30	0.257443	0.757576
1583	Triazophos	1	3	3	3	Good	0.026289	In	13	0.140334	0.857143
60	Acetamiprid	1	3	3	3	Good	0.014813	In	15	0	1
99	Amidochlor	1	3	3	3	Good	0.014813	In	15	0	1
133	Azamethiphos	1	3	3	3	Good	0.014813	In	15	0	1
137	Aziprotryne	1	3	3	3	Good	0.014813	In	15	0	1
144	Barban	1	3	3	3	Good	0.014813	In	15	0	1
149	Benazolin	1	3	3	3	Good	0.014813	In	15	0	1
150	Benazolin-dimethylammonium	1	3	3	3	Good	0.014813	In	15	0	1
151	Benazolin-ethyl	1	3	3	3	Good	0.014813	In	15	0	1
156	Benfuracarb	1	3	3	3	Good	0.014813	In	15	0	1
157	Benfuresate	1	3	3	3	Good	0.014813	In	15	0	1
171	Benzadox	1	3	3	3	Good	0.014813	In	15	0	1
172	Benzadox ammonium	1	3	3	3	Good	0.014813	In	15	0	1
176	Benzamorf	1	3	3	3	Good	0.014813	In	15	0	1
181	Benzofluor	1	3	3	3	Good	0.014813	In	15	0	1
222	Bromobonil	1	3	3	3	Good	0.014813	In	15	0	1
231	Bromoxynil-butanoate	1	3	3	3	Good	0.014813	In	15	0	1
232	Bromoxynil-octanoate	1	3	3	3	Good	0.014813	In	15	0	1
241	Bupirimate	1	3	3	3	Good	0.014813	In	15	0	1
242	Buprofezin	1	3	3	3	Good	0.014813	In	15	0	1
252	Buthiuron	1	3	3	3	Good	0.014813	In	15	0	1
259	Buturon	1	3	3	3	Good	0.014813	In	15	0	1
280	Carbetamide	1	3	3	3	Good	0.014813	In	15	0	1
303	Chloranocryl	1	3	3	3	Good	0.014813	In	15	0	1
311	Chlorbufam	1	3	3	3	Good	0.014813	In	15	0	1
347	Chlorothalonil	1	3	3	3	Good	0.014813	In	15	0	1
356	Chlorprocarb	1	3	3	3	Good	0.014813	In	15	0	1
362	Chlorthal	1	3	3	3	Good	0.014813	In	15	0	1
363	Chlorthal-dimethyl	1	3	3	3	Good	0.014813	In	15	0	1
364	Chlorthal-monomethyl	1	3	3	3	Good	0.014813	In	15	0	1
375	Ciobutide	1	3	3	3	Good	0.014813	In	15	0	1
398	Clothianidin	1	3	3	3	Good	0.014813	In	15	0	1
425	Cyclanilide	1	3	3	3	Good	0.014813	In	15	0	1
446	Cymiazol	1	3	3	3	Good	0.014813	In	15	0	1
458	Cyprofuram	1	3	3	3	Good	0.014813	In	15	0	1
496	Dibutyl phthalate	1	3	3	3	Good	0.014813	In	15	0	1
504	Dichlofluanid	1	3	3	3	Good	0.014813	In	15	0	1
520	Dichlozoline	1	3	3	3	Good	0.014813	In	15	0	1
522	Diclocymet	1	3	3	3	Good	0.014813	In	15	0	1
526	Dicloran	1	3	3	3	Good	0.014813	In	15	0	1
538	Diethatyl ethyl	1	3	3	3	Good	0.014813	In	15	0	1
559	Dimetachlone	1	3	3	3	Good	0.014813	In	15	0	1
570	Dimethyl phthalate	1	3	3	3	Good	0.014813	In	15	0	1
605	Disul	1	3	3	3	Good	0.014813	In	15	0	1
608	Disul-sodium	1	3	3	3	Good	0.014813	In	15	0	1
611	Dithiopyr	1	3	3	3	Good	0.014813	In	15	0	1
653	Ethidimuron	1	3	3	3	Good	0.014813	In	15	0	1
661	Ethofumesate	1	3	3	3	Good	0.014813	In	15	0	1
714	Fenoxanil	1	3	3	3	Good	0.014813	In	15	0	1
755	Flonicamid	1	3	3	3	Good	0.014813	In	15	0	1
849	Folpet	1	3	3	3	Good	0.014813	In	15	0	1
855	Formetanate	1	3	3	3	Good	0.014813	In	15	0	1
857	Formparanate	1	3	3	3	Good	0.014813	In	15	0	1
860	Fosmethilan	1	3	3	3	Good	0.014813	In	15	0	1
872	Furathiocarb	1	3	3	3	Good	0.014813	In	15	0	1
923	Hexythiazox	1	3	3	3	Good	0.014813	In	15	0	1
948	Imidaclothiz	1	3	3	3	Good	0.014813	In	15	0	1
967	Ioxynil octanoate	1	3	3	3	Good	0.014813	In	15	0	1
975	Iprovalicarb	1	3	3	3	Good	0.014813	In	15	0	1
1020	Karbutilate	1	3	3	3	Good	0.014813	In	15	0	1
1094	Metalaxyl	1	3	3	3	Good	0.014813	In	15	0	1
1095	Metalaxyl-M	1	3	3	3	Good	0.014813	In	15	0	1
1111	Methazole	1	3	3	3	Good	0.014813	In	15	0	1
1143	Metoxadiazone	1	3	3	3	Good	0.014813	In	15	0	1
1165	Monuron-TCA	1	3	3	3	Good	0.014813	In	15	0	1
1171	Myclozolin	1	3	3	3	Good	0.014813	In	15	0	1
1172	N-(3-chloro-2,6-dimethylphenyl)-2-methoxy-N-(tetrahydr-2-oxo-3-furanyl)acetamide	1	3	3	3	Good	0.014813	In	15	0	1
1211	Ofurace	1	3	3	3	Good	0.014813	In	15	0	1
1218	Oxabetrinil	1	3	3	3	Good	0.014813	In	15	0	1
1220	Oxadiazon	1	3	3	3	Good	0.014813	In	15	0	1
1221	Oxadixyl	1	3	3	3	Good	0.014813	In	15	0	1
1302	Procymidone	1	3	3	3	Good	0.014813	In	15	0	1
1313	Promacyl	1	3	3	3	Good	0.014813	In	15	0	1
1323	Propargite	1	3	3	3	Good	0.014813	In	15	0	1
1333	Propyl isome	1	3	3	3	Good	0.014813	In	15	0	1
1336	Propyzamide	1	3	3	3	Good	0.014813	In	15	0	1
1337	Proquinazid	1	3	3	3	Good	0.014813	In	15	0	1
1342	Prothioconazole	1	3	3	3	Good	0.014813	In	15	0	1
1346	Proximpham	1	3	3	3	Good	0.014813	In	15	0	1
1347	Prynachlor	1	3	3	3	Good	0.014813	In	15	0	1
1398	Pyroxasulfone	1	3	3	3	Good	0.014813	In	15	0	1
1412	Quintozene	1	3	3	3	Good	0.014813	In	15	0	1
1444	Sodium 5-nitroguaiacolate	1	3	3	3	Good	0.014813	In	15	0	1
1451	Sodium o-nitrophenolate	1	3	3	3	Good	0.014813	In	15	0	1
1452	Sodium p-nitrophenolate	1	3	3	3	Good	0.014813	In	15	0	1
1494	Tecnazene	1	3	3	3	Good	0.014813	In	15	0	1
1509	Tetcyclacis	1	3	3	3	Good	0.014813	In	15	0	1
1522	Thiacloprid	1	3	3	3	Good	0.014813	In	15	0	1
1523	Thiamethoxam	1	3	3	3	Good	0.014813	In	15	0	1
1526	Thiazopyr	1	3	3	3	Good	0.014813	In	15	0	1
1527	Thicyofen	1	3	3	3	Good	0.014813	In	15	0	1
1558	Tolprocarb	1	3	3	3	Good	0.014813	In	15	0	1
1561	Tolylfluanid	1	3	3	3	Good	0.014813	In	15	0	1
1637	Zarilamid	1	3	3	3	Good	0.014813	In	15	0	1
1640	Zoxamide	1	3	3	3	Good	0.014813	In	15	0	1
197	Binapacryl	1	3	3	3	Good	0.00332807	In	27	0.0484359	0.95122
931	Imazalil	1	3	3	3	Good	0.00332807	In	27	0.0484359	0.95122
932	Imazalil nitrate	1	3	3	3	Good	0.00332807	In	27	0.0484359	0.95122
1620	Triticonazole	1	3	3	3	Good	0.00332807	In	27	0.0484359	0.95122
70	Acrinathrin	1	3	3	3	Good	-0.0081569	In	27	0.391253	0.66129
177	Benzfendizone	1	3	3	3	Good	-0.0081569	In	27	0.391253	0.66129
531	Dicoumarol	1	3	3	3	Good	-0.0081569	In	27	0.391253	0.66129
629	Enoxastrobin	1	3	3	3	Good	-0.0081569	In	27	0.391253	0.66129
638	Epyrifenacil	1	3	3	3	Good	-0.0081569	In	27	0.391253	0.66129
687	Fenaminstrobin	1	3	3	3	Good	-0.0081569	In	27	0.391253	0.66129
7	1-(4-chloro-1,3-dihydro-1,3-dioxo-2H-isoindole-2-yl)-cyclohexanecarboxamide	1	3	3	3	Good	-0.1164	In	15	0.0496904	0.888889
77	Alanycarb	1	3	3	3	Good	-0.1164	In	15	0.0496904	0.888889
100	Amidoflumet	1	3	3	3	Good	-0.1164	In	15	0.0496904	0.888889
127	Asulam	1	3	3	3	Good	-0.1164	In	15	0.0496904	0.888889
132	Azafenidin	1	3	3	3	Good	-0.1164	In	15	0.0496904	0.888889
136	Azinphos-methyl	1	3	3	3	Good	-0.1164	In	15	0.0496904	0.888889
167	Bentazone	1	3	3	3	Good	-0.1164	In	15	0.0496904	0.888889
174	Benzamacril	1	3	3	3	Good	-0.1164	In	15	0.0496904	0.888889
175	Benzamacril isobutyl	1	3	3	3	Good	-0.1164	In	15	0.0496904	0.888889
289	Carfentrazone	1	3	3	3	Good	-0.1164	In	15	0.0496904	0.888889
290	Carfentrazone-ethyl	1	3	3	3	Good	-0.1164	In	15	0.0496904	0.888889
368	Chlozolinate	1	3	3	3	Good	-0.1164	In	15	0.0496904	0.888889
448	Cyometrinil	1	3	3	3	Good	-0.1164	In	15	0.0496904	0.888889
557	Dimefuron	1	3	3	3	Good	-0.1164	In	15	0.0496904	0.888889
618	Drazoxolon	1	3	3	3	Good	-0.1164	In	15	0.0496904	0.888889
686	Fenaminosulf	1	3	3	3	Good	-0.1164	In	15	0.0496904	0.888889
718	Fenoxasulfone	1	3	3	3	Good	-0.1164	In	15	0.0496904	0.888889
739	Fentrazamide	1	3	3	3	Good	-0.1164	In	15	0.0496904	0.888889
806	Fluoridamid	1	3	3	3	Good	-0.1164	In	15	0.0496904	0.888889
840	Fluthiacet	1	3	3	3	Good	-0.1164	In	15	0.0496904	0.888889
841	Fluthiacet-methyl	1	3	3	3	Good	-0.1164	In	15	0.0496904	0.888889
934	Imazamethabenz	1	3	3	3	Good	-0.1164	In	15	0.0496904	0.888889
935	Imazamethabenz-methyl	1	3	3	3	Good	-0.1164	In	15	0.0496904	0.888889
936	Imazamox	1	3	3	3	Good	-0.1164	In	15	0.0496904	0.888889
937	Imazapic	1	3	3	3	Good	-0.1164	In	15	0.0496904	0.888889
938	Imazapic-ammonium	1	3	3	3	Good	-0.1164	In	15	0.0496904	0.888889
939	Imazapyr	1	3	3	3	Good	-0.1164	In	15	0.0496904	0.888889
942	Imazethapyr	1	3	3	3	Good	-0.1164	In	15	0.0496904	0.888889
943	Imazethapyr ammonium	1	3	3	3	Good	-0.1164	In	15	0.0496904	0.888889
947	Imidacloprid	1	3	3	3	Good	-0.1164	In	15	0.0496904	0.888889
974	Iprodione	1	3	3	3	Good	-0.1164	In	15	0.0496904	0.888889
1006	Isoval	1	3	3	3	Good	-0.1164	In	15	0.0496904	0.888889
1077	Mefenpyr	1	3	3	3	Good	-0.1164	In	15	0.0496904	0.888889
1078	Mefenpyr diethyl	1	3	3	3	Good	-0.1164	In	15	0.0496904	0.888889
1080	Mefluidide	1	3	3	3	Good	-0.1164	In	15	0.0496904	0.888889
1099	Metamitron	1	3	3	3	Good	-0.1164	In	15	0.0496904	0.888889
1103	Metazoxolon	1	3	3	3	Good	-0.1164	In	15	0.0496904	0.888889
1110	Methasulfocarb	1	3	3	3	Good	-0.1164	In	15	0.0496904	0.888889
1189	Nitenpyram	1	3	3	3	Good	-0.1164	In	15	0.0496904	0.888889
1196	N-methyl saccharine	1	3	3	3	Good	-0.1164	In	15	0.0496904	0.888889
1219	Oxadiargyl	1	3	3	3	Good	-0.1164	In	15	0.0496904	0.888889
1228	Oxolinic acid	1	3	3	3	Good	-0.1164	In	15	0.0496904	0.888889
1267	Phosmet	1	3	3	3	Good	-0.1164	In	15	0.0496904	0.888889
1279	Pindone	1	3	3	3	Good	-0.1164	In	15	0.0496904	0.888889
1280	Pinoxaden	1	3	3	3	Good	-0.1164	In	15	0.0496904	0.888889
1351	Pymetrozine	1	3	3	3	Good	-0.1164	In	15	0.0496904	0.888889
1476	Sulfoxaflor	1	3	3	3	Good	-0.1164	In	15	0.0496904	0.888889
1626	Valifenalate	1	3	3	3	Good	-0.1164	In	15	0.0496904	0.888889
200	Bioresmethrin	1	3	3	3	Good	-0.127885	In	27	0	1
897	Halacrinate	1	3	3	3	Good	-0.127885	In	27	0	1
1241	Pefurazoate	1	3	3	3	Good	-0.127885	In	27	0	1
1380	Pyridalyl	1	3	3	3	Good	-0.127885	In	27	0	1
1417	Resmethrin	1	3	3	3	Good	-0.127885	In	27	0	1
141	Azothoate	1	3	3	3	Good	-0.236136	In	13	0.046778	0.952381
1576	Triamiphos	1	3	3	3	Good	-0.241874	In	11	0.155334	0.8
20	1,3-dinitrobenzene	1	3	3	3	Good	-0.247612	In	21	0.0514344	0.909091
93	Ametoctradin	1	3	3	3	Good	-0.247612	In	21	0.0514344	0.909091
153	Benclothiaz	1	3	3	3	Good	-0.247612	In	21	0.0514344	0.909091
155	Benfluralin	1	3	3	3	Good	-0.247612	In	21	0.0514344	0.909091
257	Butralin	1	3	3	3	Good	-0.247612	In	21	0.0514344	0.909091
278	Carbasulam	1	3	3	3	Good	-0.247612	In	21	0.0514344	0.909091
327	Chlorfluazole	1	3	3	3	Good	-0.247612	In	21	0.0514344	0.909091
576	Dinex	1	3	3	3	Good	-0.247612	In	21	0.0514344	0.909091
577	Dinex-diclexine	1	3	3	3	Good	-0.247612	In	21	0.0514344	0.909091
580	Dinitramine	1	3	3	3	Good	-0.247612	In	21	0.0514344	0.909091
586	Dinosam	1	3	3	3	Good	-0.247612	In	21	0.0514344	0.909091
590	Dinoterb	1	3	3	3	Good	-0.247612	In	21	0.0514344	0.909091
599	Dipropalin	1	3	3	3	Good	-0.247612	In	21	0.0514344	0.909091
614	DNOC	1	3	3	3	Good	-0.247612	In	21	0.0514344	0.909091
679	Etinofen	1	3	3	3	Good	-0.247612	In	21	0.0514344	0.909091
703	Fenitropan	1	3	3	3	Good	-0.247612	In	21	0.0514344	0.909091
773	Fluchloralin	1	3	3	3	Good	-0.247612	In	21	0.0514344	0.909091
789	Flufenpyr	1	3	3	3	Good	-0.247612	In	21	0.0514344	0.909091
790	Flufenpyr-ethyl	1	3	3	3	Good	-0.247612	In	21	0.0514344	0.909091
796	Flumiclorac	1	3	3	3	Good	-0.247612	In	21	0.0514344	0.909091
797	Flumiclorac-pentyl	1	3	3	3	Good	-0.247612	In	21	0.0514344	0.909091
799	Flumipropyn	1	3	3	3	Good	-0.247612	In	21	0.0514344	0.909091
811	Fluoromidine	1	3	3	3	Good	-0.247612	In	21	0.0514344	0.909091
894	Guadipyr	1	3	3	3	Good	-0.247612	In	21	0.0514344	0.909091
997	Isopropalin	1	3	3	3	Good	-0.247612	In	21	0.0514344	0.909091
1074	Medinoterb	1	3	3	3	Good	-0.247612	In	21	0.0514344	0.909091
1195	Nitrothal-isopropyl	1	3	3	3	Good	-0.247612	In	21	0.0514344	0.909091
1244	Pendimethalin	1	3	3	3	Good	-0.247612	In	21	0.0514344	0.909091
1303	Prodiamine	1	3	3	3	Good	-0.247612	In	21	0.0514344	0.909091
1305	Profluazol	1	3	3	3	Good	-0.247612	In	21	0.0514344	0.909091
1306	Profluralin	1	3	3	3	Good	-0.247612	In	21	0.0514344	0.909091
1421	Saisentong	1	3	3	3	Good	-0.247612	In	21	0.0514344	0.909091
1470	Sulfentrazone	1	3	3	3	Good	-0.247612	In	21	0.0514344	0.909091
1528	Thidiazimin	1	3	3	3	Good	-0.247612	In	21	0.0514344	0.909091
1541	Thiophanate	1	3	3	3	Good	-0.247612	In	21	0.0514344	0.909091
1542	Thiophanate-methyl	1	3	3	3	Good	-0.247612	In	21	0.0514344	0.909091
1560	Toluene 2,4-diisocyanate	1	3	3	3	Good	-0.247612	In	21	0.0514344	0.909091
1609	Trifluralin	1	3	3	3	Good	-0.247612	In	21	0.0514344	0.909091
199	Biopermethrin	1	3	3	3	Good	-0.259097	In	27	0.0484359	0.953488
377	Cis-permethrin	1	3	3	3	Good	-0.259097	In	27	0.0484359	0.953488
408	Coumafuryl	1	3	3	3	Good	-0.259097	In	27	0.0484359	0.953488
409	Coumatetralyl	1	3	3	3	Good	-0.259097	In	27	0.0484359	0.953488
438	Cyenopyrafen	1	3	3	3	Good	-0.259097	In	27	0.0484359	0.953488
567	Dimethomorph	1	3	3	3	Good	-0.259097	In	27	0.0484359	0.953488
800	Flumorph	1	3	3	3	Good	-0.259097	In	27	0.0484359	0.953488
842	Flutianil	1	3	3	3	Good	-0.259097	In	27	0.0484359	0.953488
933	Imazalil sulfate	1	3	3	3	Good	-0.259097	In	27	0.0484359	0.953488
1016	Kadethrin	1	3	3	3	Good	-0.259097	In	27	0.0484359	0.953488
1225	Oxaziclomefone	1	3	3	3	Good	-0.259097	In	27	0.0484359	0.953488
1253	Permethrin	1	3	3	3	Good	-0.259097	In	27	0.0484359	0.953488
1259	Phenothrin	1	3	3	3	Good	-0.259097	In	27	0.0484359	0.953488
1360	Pyranocoumarin	1	3	3	3	Good	-0.259097	In	27	0.0484359	0.953488
1391	Pyrimorph	1	3	3	3	Good	-0.259097	In	27	0.0484359	0.953488
1481	Sumithrin	1	3	3	3	Good	-0.259097	In	27	0.0484359	0.953488
1569	Transpermethrin	1	3	3	3	Good	-0.259097	In	27	0.0484359	0.953488
5	(R)-hexaconazole	1	3	3	3	Good	-0.378825	In	21	0	1
21	1,4-dimethylnaphthalene	1	3	3	3	Good	-0.378825	In	21	0	1
25	1-methylnaphthalene	1	3	3	3	Good	-0.378825	In	21	0	1
30	2-(thiocyanomethylthio)benzothiazole	1	3	3	3	Good	-0.378825	In	21	0	1
50	2-methyl naphthalene	1	3	3	3	Good	-0.378825	In	21	0	1
55	8-hydroxyquinoline	1	3	3	3	Good	-0.378825	In	21	0	1
65	Acibenzolar	1	3	3	3	Good	-0.378825	In	21	0	1
66	Acibenzolar-S-methyl	1	3	3	3	Good	-0.378825	In	21	0	1
101	Amidosulfuron	1	3	3	3	Good	-0.378825	In	21	0	1
131	Azaconazole	1	3	3	3	Good	-0.378825	In	21	0	1
152	Bencarbazone	1	3	3	3	Good	-0.378825	In	21	0	1
166	Bentaluron	1	3	3	3	Good	-0.378825	In	21	0	1
187	Benzthiazuron	1	3	3	3	Good	-0.378825	In	21	0	1
234	Bromuconazole	1	3	3	3	Good	-0.378825	In	21	0	1
279	Carbendazim	1	3	3	3	Good	-0.378825	In	21	0	1
360	Chlorquinox	1	3	3	3	Good	-0.378825	In	21	0	1
455	Cyproconazole	1	3	3	3	Good	-0.378825	In	21	0	1
471	Debacarb	1	3	3	3	Good	-0.378825	In	21	0	1
581	Dinobuton	1	3	3	3	Good	-0.378825	In	21	0	1
583	Dinocton	1	3	3	3	Good	-0.378825	In	21	0	1
585	Dinopenton	1	3	3	3	Good	-0.378825	In	21	0	1
587	Dinoseb acetate	1	3	3	3	Good	-0.378825	In	21	0	1
588	Dinosulfon	1	3	3	3	Good	-0.378825	In	21	0	1
591	Dinoterb acetate	1	3	3	3	Good	-0.378825	In	21	0	1
643	Etaconazole	1	3	3	3	Good	-0.378825	In	21	0	1
647	Ethalfluralin	1	3	3	3	Good	-0.378825	In	21	0	1
671	Ethylchlozate	1	3	3	3	Good	-0.378825	In	21	0	1
771	Flucarbazone	1	3	3	3	Good	-0.378825	In	21	0	1
798	Flumioxazin	1	3	3	3	Good	-0.378825	In	21	0	1
873	Furconazole	1	3	3	3	Good	-0.378825	In	21	0	1
917	Hexaconazole	1	3	3	3	Good	-0.378825	In	21	0	1
924	Huanjunzuo	1	3	3	3	Good	-0.378825	In	21	0	1
969	Ipconazole	1	3	3	3	Good	-0.378825	In	21	0	1
1073	Medetomidine	1	3	3	3	Good	-0.378825	In	21	0	1
1075	Medinoterb acetate	1	3	3	3	Good	-0.378825	In	21	0	1
1105	Metconazole	1	3	3	3	Good	-0.378825	In	21	0	1
1107	Methabenzthiazuron	1	3	3	3	Good	-0.378825	In	21	0	1
1178	Nanosilver-silica composite	1	3	3	3	Good	-0.378825	In	21	0	1
1179	Naphthalene	1	3	3	3	Good	-0.378825	In	21	0	1
1216	Orysastrobin	1	3	3	3	Good	-0.378825	In	21	0	1
1227	Oxine-copper	1	3	3	3	Good	-0.378825	In	21	0	1
1242	Penconazole	1	3	3	3	Good	-0.378825	In	21	0	1
1250	Penthiopyrad	1	3	3	3	Good	-0.378825	In	21	0	1
1327	Propiconazole	1	3	3	3	Good	-0.378825	In	21	0	1
1438	Simeconazole	1	3	3	3	Good	-0.378825	In	21	0	1
1468	Sulcotrione	1	3	3	3	Good	-0.378825	In	21	0	1
1486	Tebuconazole	1	3	3	3	Good	-0.378825	In	21	0	1
1497	Tefuryltrione	1	3	3	3	Good	-0.378825	In	21	0	1
1498	Tembotrione	1	3	3	3	Good	-0.378825	In	21	0	1
1512	Tetraconazole	1	3	3	3	Good	-0.378825	In	21	0	1
1530	Thiencarbazone	1	3	3	3	Good	-0.378825	In	21	0	1
1531	Thiencarbazone-methyl	1	3	3	3	Good	-0.378825	In	21	0	1
1570	Trans-propiconazole	1	3	3	3	Good	-0.378825	In	21	0	1
1573	Triadimenol	1	3	3	3	Good	-0.378825	In	21	0	1
1604	Trifludimoxazin	1	3	3	3	Good	-0.378825	In	21	0	1
89	Alpha-cypermethrin	1	3	3	3	Good	-0.39031	In	27	0.0968719	0.911111
189	Beta-cyfluthrin	1	3	3	3	Good	-0.39031	In	27	0.0968719	0.911111
190	Beta-cypermethrin	1	3	3	3	Good	-0.39031	In	27	0.0968719	0.911111
407	Coumachlor	1	3	3	3	Good	-0.39031	In	27	0.0968719	0.911111
441	Cyfluthrin	1	3	3	3	Good	-0.39031	In	27	0.0968719	0.911111
450	Cypermethrin	1	3	3	3	Good	-0.39031	In	27	0.0968719	0.911111
453	Cyphenothrin	1	3	3	3	Good	-0.39031	In	27	0.0968719	0.911111
476	Deltamethrin	1	3	3	3	Good	-0.39031	In	27	0.0968719	0.911111
722	Fenpirithrin	1	3	3	3	Good	-0.39031	In	27	0.0968719	0.911111
1520	Theta-cypermethrin	1	3	3	3	Good	-0.39031	In	27	0.0968719	0.911111
1632	Warfarin	1	3	3	3	Good	-0.39031	In	27	0.0968719	0.911111
1638	Zeta-cypermethrin	1	3	3	3	Good	-0.39031	In	27	0.0968719	0.911111
39	2,4-DEP	1	3	3	3	Good	-0.492824	In	13	0.198462	0.777778
12	1,1-bis(4-chlorophenyl)-2-ethoxyethanol	1	3	3	3	Good	-0.510037	In	11	0	1
26	1-naphthylacetamide	1	3	3	3	Good	-0.510037	In	11	0	1
27	1-naphthylacetic acid	1	3	3	3	Good	-0.510037	In	11	0	1
51	2-naphthyloxyacetic acid	1	3	3	3	Good	-0.510037	In	11	0	1
52	2-phenylphenol	1	3	3	3	Good	-0.510037	In	11	0	1
53	4,4-methylenedianiline	1	3	3	3	Good	-0.510037	In	11	0	1
73	Acynonapyr	1	3	3	3	Good	-0.510037	In	11	0	1
91	Alpha-naphthylthiourea	1	3	3	3	Good	-0.510037	In	11	0	1
121	Ancymidol	1	3	3	3	Good	-0.510037	In	11	0	1
122	Anilazine	1	3	3	3	Good	-0.510037	In	11	0	1
140	Azoluron	1	3	3	3	Good	-0.510037	In	11	0	1
159	Benomyl	1	3	3	3	Good	-0.510037	In	11	0	1
168	Benthiavalicarb	1	3	3	3	Good	-0.510037	In	11	0	1
169	Benthiavalicarb-isopropyl	1	3	3	3	Good	-0.510037	In	11	0	1
173	Benzalkonium chloride	1	3	3	3	Good	-0.510037	In	11	0	1
192	Bethoxazin	1	3	3	3	Good	-0.510037	In	11	0	1
201	Biphenyl	1	3	3	3	Good	-0.510037	In	11	0	1
210	Bithionol	1	3	3	3	Good	-0.510037	In	11	0	1
277	Carbaryl	1	3	3	3	Good	-0.510037	In	11	0	1
294	Chinomethionat	1	3	3	3	Good	-0.510037	In	11	0	1
308	Chlorbenside	1	3	3	3	Good	-0.510037	In	11	0	1
319	Chlorfenapyr	1	3	3	3	Good	-0.510037	In	11	0	1
321	Chlorfenethol	1	3	3	3	Good	-0.510037	In	11	0	1
380	Climbazole	1	3	3	3	Good	-0.510037	In	11	0	1
396	Cloquintocet-mexyl	1	3	3	3	Good	-0.510037	In	11	0	1
413	Credazine	1	3	3	3	Good	-0.510037	In	11	0	1
451	Cyperquat	1	3	3	3	Good	-0.510037	In	11	0	1
452	Cyperquat iodide	1	3	3	3	Good	-0.510037	In	11	0	1
456	Cyprodinil	1	3	3	3	Good	-0.510037	In	11	0	1
469	DDD	1	3	3	3	Good	-0.510037	In	11	0	1
470	DDT	1	3	3	3	Good	-0.510037	In	11	0	1
507	Dichlorophen	1	3	3	3	Good	-0.510037	In	11	0	1
529	Dicofol	1	3	3	3	Good	-0.510037	In	11	0	1
554	Diflumetorim	1	3	3	3	Good	-0.510037	In	11	0	1
592	Diofenolan	1	3	3	3	Good	-0.510037	In	11	0	1
597	Diphenylamine	1	3	3	3	Good	-0.510037	In	11	0	1
602	Dipyrithione	1	3	3	3	Good	-0.510037	In	11	0	1
603	Diquat	1	3	3	3	Good	-0.510037	In	11	0	1
646	Ethaboxam	1	3	3	3	Good	-0.510037	In	11	0	1
672	Ethyl-DDD	1	3	3	3	Good	-0.510037	In	11	0	1
689	Fenapanil	1	3	3	3	Good	-0.510037	In	11	0	1
695	Fenchlorazole	1	3	3	3	Good	-0.510037	In	11	0	1
698	Fenclorim	1	3	3	3	Good	-0.510037	In	11	0	1
701	Fenfuram	1	3	3	3	Good	-0.510037	In	11	0	1
720	Fenpiclonil	1	3	3	3	Good	-0.510037	In	11	0	1
767	Fluazolate	1	3	3	3	Good	-0.510037	In	11	0	1
780	Fludioxonil	1	3	3	3	Good	-0.510037	In	11	0	1
783	Flufenacet	1	3	3	3	Good	-0.510037	In	11	0	1
784	Flufenerim	1	3	3	3	Good	-0.510037	In	11	0	1
792	Fluindapyr	1	3	3	3	Good	-0.510037	In	11	0	1
805	Fluorbenside	1	3	3	3	Good	-0.510037	In	11	0	1
829	Flurazole	1	3	3	3	Good	-0.510037	In	11	0	1
836	Flurprimidol	1	3	3	3	Good	-0.510037	In	11	0	1
871	Furametpyr	1	3	3	3	Good	-0.510037	In	11	0	1
916	Hexachlorophene	1	3	3	3	Good	-0.510037	In	11	0	1
954	Indaziflam	1	3	3	3	Good	-0.510037	In	11	0	1
959	Inpyrfluxam	1	3	3	3	Good	-0.510037	In	11	0	1
989	Isoflucypram	1	3	3	3	Good	-0.510037	In	11	0	1
1001	Isopyrazam	1	3	3	3	Good	-0.510037	In	11	0	1
1002	Isopyrimol	1	3	3	3	Good	-0.510037	In	11	0	1
1007	Isoxaben	1	3	3	3	Good	-0.510037	In	11	0	1
1064	Mecarbinzid	1	3	3	3	Good	-0.510037	In	11	0	1
1101	Metazachlor	1	3	3	3	Good	-0.510037	In	11	0	1
1112	Methfuroxam	1	3	3	3	Good	-0.510037	In	11	0	1
1117	Methiozolin	1	3	3	3	Good	-0.510037	In	11	0	1
1123	Methoxychlor	1	3	3	3	Good	-0.510037	In	11	0	1
1147	Metsulfovax	1	3	3	3	Good	-0.510037	In	11	0	1
1169	Myclobutanil	1	3	3	3	Good	-0.510037	In	11	0	1
1170	Myclobutanil hydrochloride	1	3	3	3	Good	-0.510037	In	11	0	1
1181	Napropamide	1	3	3	3	Good	-0.510037	In	11	0	1
1182	Napropamide-M	1	3	3	3	Good	-0.510037	In	11	0	1
1191	Nitralin	1	3	3	3	Good	-0.510037	In	11	0	1
1207	O,O'-DDT	1	3	3	3	Good	-0.510037	In	11	0	1
1208	O,P'-DDT	1	3	3	3	Good	-0.510037	In	11	0	1
1217	Oryzalin	1	3	3	3	Good	-0.510037	In	11	0	1
1229	Oxpoconazole	1	3	3	3	Good	-0.510037	In	11	0	1
1230	Oxpoconazole fumarate	1	3	3	3	Good	-0.510037	In	11	0	1
1236	Paraquat	1	3	3	3	Good	-0.510037	In	11	0	1
1245	Penflufen	1	3	3	3	Good	-0.510037	In	11	0	1
1296	Pretilachlor	1	3	3	3	Good	-0.510037	In	11	0	1
1332	Propoxycarbazone	1	3	3	3	Good	-0.510037	In	11	0	1
1349	Pydiflumetofen	1	3	3	3	Good	-0.510037	In	11	0	1
1354	Pyraclonil	1	3	3	3	Good	-0.510037	In	11	0	1
1356	Pyraflufen-ethyl	1	3	3	3	Good	-0.510037	In	11	0	1
1386	Pyrimethanil	1	3	3	3	Good	-0.510037	In	11	0	1
1387	Pyrimidifen	1	3	3	3	Good	-0.510037	In	11	0	1
1395	Pyrisoxazole	1	3	3	3	Good	-0.510037	In	11	0	1
1400	Quinacetol	1	3	3	3	Good	-0.510037	In	11	0	1
1403	Quinclorac	1	3	3	3	Good	-0.510037	In	11	0	1
1405	Quinmerac	1	3	3	3	Good	-0.510037	In	11	0	1
1427	Sedaxane	1	3	3	3	Good	-0.510037	In	11	0	1
1488	Tebufenpyrad	1	3	3	3	Good	-0.510037	In	11	0	1
1489	Tebufloquin	1	3	3	3	Good	-0.510037	In	11	0	1
1518	Tetrasul	1	3	3	3	Good	-0.510037	In	11	0	1
1519	Thenylchlor	1	3	3	3	Good	-0.510037	In	11	0	1
1529	Thidiazuron	1	3	3	3	Good	-0.510037	In	11	0	1
1534	Thifluzamide	1	3	3	3	Good	-0.510037	In	11	0	1
1543	Thioquinox	1	3	3	3	Good	-0.510037	In	11	0	1
1547	Tiadinil	1	3	3	3	Good	-0.510037	In	11	0	1
1562	Topramezone	1	3	3	3	Good	-0.510037	In	11	0	1
1566	Tralopyril	1	3	3	3	Good	-0.510037	In	11	0	1
1572	Triadimefon	1	3	3	3	Good	-0.510037	In	11	0	1
1582	Triaziflam	1	3	3	3	Good	-0.510037	In	11	0	1
1607	Triflumizole	1	3	3	3	Good	-0.510037	In	11	0	1
1622	Tyclopyrazoflor	1	3	3	3	Good	-0.510037	In	11	0	1
1524	Thiapronil	1	3	3	3	Good	-0.521522	In	27	0.145308	0.87234
42	2,6-dichloro-N-((4-(trifluoromethyl)phenyl)methyl-benzamide	1	3	3	3	Good	-0.64125	In	11	0.051778	0.923077
64	Acetoprole	1	3	3	3	Good	-0.64125	In	11	0.051778	0.923077
139	Azobenzene	1	3	3	3	Good	-0.64125	In	11	0.051778	0.923077
142	Azoxybenzene	1	3	3	3	Good	-0.64125	In	11	0.051778	0.923077
146	Beflubutamid	1	3	3	3	Good	-0.64125	In	11	0.051778	0.923077
158	Benodanil	1	3	3	3	Good	-0.64125	In	11	0.051778	0.923077
178	Benzipram	1	3	3	3	Good	-0.64125	In	11	0.051778	0.923077
183	Benzovindiflupyr	1	3	3	3	Good	-0.64125	In	11	0.051778	0.923077
188	Benzyl benzoate	1	3	3	3	Good	-0.64125	In	11	0.051778	0.923077
194	Bifenazate	1	3	3	3	Good	-0.64125	In	11	0.051778	0.923077
229	Bromopropylate	1	3	3	3	Good	-0.64125	In	11	0.051778	0.923077
251	Buthiobate	1	3	3	3	Good	-0.64125	In	11	0.051778	0.923077
305	Chlorazifop	1	3	3	3	Good	-0.64125	In	11	0.051778	0.923077
325	Chlorfensulphide	1	3	3	3	Good	-0.64125	In	11	0.051778	0.923077
329	Chlorfluren	1	3	3	3	Good	-0.64125	In	11	0.051778	0.923077
330	Chlorfluren methyl	1	3	3	3	Good	-0.64125	In	11	0.051778	0.923077
331	Chlorflurenol	1	3	3	3	Good	-0.64125	In	11	0.051778	0.923077
332	Chlorflurenol methyl	1	3	3	3	Good	-0.64125	In	11	0.051778	0.923077
340	Chlorobenzilate	1	3	3	3	Good	-0.64125	In	11	0.051778	0.923077
346	Chloropropylate	1	3	3	3	Good	-0.64125	In	11	0.051778	0.923077
350	Chloroxuron	1	3	3	3	Good	-0.64125	In	11	0.051778	0.923077
382	Clodinafop	1	3	3	3	Good	-0.64125	In	11	0.051778	0.923077
388	Clofop	1	3	3	3	Good	-0.64125	In	11	0.051778	0.923077
389	Clofop-isobutyl	1	3	3	3	Good	-0.64125	In	11	0.051778	0.923077
391	Clomeprop	1	3	3	3	Good	-0.64125	In	11	0.051778	0.923077
401	Copper bis(3-phenylsalicylate)	1	3	3	3	Good	-0.64125	In	11	0.051778	0.923077
416	Cumyluron	1	3	3	3	Good	-0.64125	In	11	0.051778	0.923077
433	Cyclopyrimorate	1	3	3	3	Good	-0.64125	In	11	0.051778	0.923077
449	Cypendazole	1	3	3	3	Good	-0.64125	In	11	0.051778	0.923077
464	Daimuron	1	3	3	3	Good	-0.64125	In	11	0.051778	0.923077
484	Denatonium benzoate	1	3	3	3	Good	-0.64125	In	11	0.051778	0.923077
488	Diafenthiuron	1	3	3	3	Good	-0.64125	In	11	0.051778	0.923077
523	Diclofop	1	3	3	3	Good	-0.64125	In	11	0.051778	0.923077
524	Diclofop-methyl	1	3	3	3	Good	-0.64125	In	11	0.051778	0.923077
546	Difenoxuron	1	3	3	3	Good	-0.64125	In	11	0.051778	0.923077
596	Diphenamid	1	3	3	3	Good	-0.64125	In	11	0.051778	0.923077
658	Ethiprole	1	3	3	3	Good	-0.64125	In	11	0.051778	0.923077
681	Etoxazole	1	3	3	3	Good	-0.64125	In	11	0.051778	0.923077
719	Fenoxycarb	1	3	3	3	Good	-0.64125	In	11	0.051778	0.923077
744	Ferimzone	1	3	3	3	Good	-0.64125	In	11	0.051778	0.923077
746	Fipronil	1	3	3	3	Good	-0.64125	In	11	0.051778	0.923077
757	Florpyrauxifen	1	3	3	3	Good	-0.64125	In	11	0.051778	0.923077
762	Fluazifop	1	3	3	3	Good	-0.64125	In	11	0.051778	0.923077
763	Fluazifop-butyl	1	3	3	3	Good	-0.64125	In	11	0.051778	0.923077
764	Fluazifop-P	1	3	3	3	Good	-0.64125	In	11	0.051778	0.923077
765	Fluazifop-P-butyl	1	3	3	3	Good	-0.64125	In	11	0.051778	0.923077
777	Flucofuron	1	3	3	3	Good	-0.64125	In	11	0.051778	0.923077
781	Fluenetil	1	3	3	3	Good	-0.64125	In	11	0.051778	0.923077
802	Fluopicolide	1	3	3	3	Good	-0.64125	In	11	0.051778	0.923077
803	Fluopimomide	1	3	3	3	Good	-0.64125	In	11	0.051778	0.923077
804	Fluopyram	1	3	3	3	Good	-0.64125	In	11	0.051778	0.923077
830	Flurenol	1	3	3	3	Good	-0.64125	In	11	0.051778	0.923077
831	Flurenol-butyl	1	3	3	3	Good	-0.64125	In	11	0.051778	0.923077
843	Flutolanil	1	3	3	3	Good	-0.64125	In	11	0.051778	0.923077
853	Forchlorfenuron	1	3	3	3	Good	-0.64125	In	11	0.051778	0.923077
869	Furalaxyl	1	3	3	3	Good	-0.64125	In	11	0.051778	0.923077
898	Halauxifen	1	3	3	3	Good	-0.64125	In	11	0.051778	0.923077
899	Halauxifen-methyl	1	3	3	3	Good	-0.64125	In	11	0.051778	0.923077
905	Haloxyfop	1	3	3	3	Good	-0.64125	In	11	0.051778	0.923077
906	Haloxyfop-etotyl	1	3	3	3	Good	-0.64125	In	11	0.051778	0.923077
907	Haloxyfop-P	1	3	3	3	Good	-0.64125	In	11	0.051778	0.923077
908	Haloxyfop-P-methyl	1	3	3	3	Good	-0.64125	In	11	0.051778	0.923077
988	Isofetamid	1	3	3	3	Good	-0.64125	In	11	0.051778	0.923077
1004	Isotianil	1	3	3	3	Good	-0.64125	In	11	0.051778	0.923077
1012	Isoxapyrifop	1	3	3	3	Good	-0.64125	In	11	0.051778	0.923077
1043	Mandestrobin	1	3	3	3	Good	-0.64125	In	11	0.051778	0.923077
1062	Mebenil	1	3	3	3	Good	-0.64125	In	11	0.051778	0.923077
1082	Mepanipyrim	1	3	3	3	Good	-0.64125	In	11	0.051778	0.923077
1087	Mepronil	1	3	3	3	Good	-0.64125	In	11	0.051778	0.923077
1092	Mesotrione	1	3	3	3	Good	-0.64125	In	11	0.051778	0.923077
1125	Methoxyphenone	1	3	3	3	Good	-0.64125	In	11	0.051778	0.923077
1132	Methyldymron	1	3	3	3	Good	-0.64125	In	11	0.051778	0.923077
1136	Metobenzuron	1	3	3	3	Good	-0.64125	In	11	0.051778	0.923077
1145	Metrafenone	1	3	3	3	Good	-0.64125	In	11	0.051778	0.923077
1243	Pencycuron	1	3	3	3	Good	-0.64125	In	11	0.051778	0.923077
1350	Pyflubumide	1	3	3	3	Good	-0.64125	In	11	0.051778	0.923077
1375	Pyributicarb	1	3	3	3	Good	-0.64125	In	11	0.051778	0.923077
1381	Pyridate	1	3	3	3	Good	-0.64125	In	11	0.051778	0.923077
1382	Pyridinitril	1	3	3	3	Good	-0.64125	In	11	0.051778	0.923077
1383	Pyrifenox	1	3	3	3	Good	-0.64125	In	11	0.051778	0.923077
1385	Pyriftalid	1	3	3	3	Good	-0.64125	In	11	0.051778	0.923077
1392	Pyriofenone	1	3	3	3	Good	-0.64125	In	11	0.051778	0.923077
1396	Pyrithiobac-sodium	1	3	3	3	Good	-0.64125	In	11	0.051778	0.923077
1594	Triclopyricarb	1	3	3	3	Good	-0.64125	In	11	0.051778	0.923077
179	Benzobicyclon	1	3	3	3	Good	-0.652735	In	27	0.193744	0.836735
3	(R)-flufiprole	1	3	3	3	Good	-0.772463	In	11	0.103556	0.857143
8	1-(4-chlorophenyl)-3-(2,6-dichlorobenzoyl)urea	1	3	3	3	Good	-0.772463	In	11	0.103556	0.857143
69	Aclonifen	1	3	3	3	Good	-0.772463	In	11	0.103556	0.857143
113	Amitraz	1	3	3	3	Good	-0.772463	In	11	0.103556	0.857143
124	Anisuron	1	3	3	3	Good	-0.772463	In	11	0.103556	0.857143
147	Benalaxyl	1	3	3	3	Good	-0.772463	In	11	0.103556	0.857143
148	Benalaxyl-M	1	3	3	3	Good	-0.772463	In	11	0.103556	0.857143
161	Benquinox	1	3	3	3	Good	-0.772463	In	11	0.103556	0.857143
184	Benzoximate	1	3	3	3	Good	-0.772463	In	11	0.103556	0.857143
185	Benzoylprop	1	3	3	3	Good	-0.772463	In	11	0.103556	0.857143
186	Benzoylprop-ethyl	1	3	3	3	Good	-0.772463	In	11	0.103556	0.857143
208	Bistrifluron	1	3	3	3	Good	-0.772463	In	11	0.103556	0.857143
263	Cafenstrole	1	3	3	3	Good	-0.772463	In	11	0.103556	0.857143
296	Chlomethoxyfen	1	3	3	3	Good	-0.772463	In	11	0.103556	0.857143
306	Chlorazifop propargyl	1	3	3	3	Good	-0.772463	In	11	0.103556	0.857143
324	Chlorfenson	1	3	3	3	Good	-0.772463	In	11	0.103556	0.857143
339	Chlornitrofen	1	3	3	3	Good	-0.772463	In	11	0.103556	0.857143
371	Chromafenozide	1	3	3	3	Good	-0.772463	In	11	0.103556	0.857143
383	Clodinafop propargyl	1	3	3	3	Good	-0.772463	In	11	0.103556	0.857143
423	Cyazofamid	1	3	3	3	Good	-0.772463	In	11	0.103556	0.857143
439	Cyflufenamid	1	3	3	3	Good	-0.772463	In	11	0.103556	0.857143
443	Cyhalofop	1	3	3	3	Good	-0.772463	In	11	0.103556	0.857143
444	Cyhalofop-butyl	1	3	3	3	Good	-0.772463	In	11	0.103556	0.857143
485	Desmedipham	1	3	3	3	Good	-0.772463	In	11	0.103556	0.857143
502	Dichlobentiazox	1	3	3	3	Good	-0.772463	In	11	0.103556	0.857143
551	Diflubenzuron	1	3	3	3	Good	-0.772463	In	11	0.103556	0.857143
575	Dimoxystrobin	1	3	3	3	Good	-0.772463	In	11	0.103556	0.857143
664	Ethoxyfen	1	3	3	3	Good	-0.772463	In	11	0.103556	0.857143
665	Ethoxyfen-ethyl	1	3	3	3	Good	-0.772463	In	11	0.103556	0.857143
685	Fenamidone	1	3	3	3	Good	-0.772463	In	11	0.103556	0.857143
705	Fenmezoditiaz	1	3	3	3	Good	-0.772463	In	11	0.103556	0.857143
723	Fenpropathrin	1	3	3	3	Good	-0.772463	In	11	0.103556	0.857143
732	Fenson	1	3	3	3	Good	-0.772463	In	11	0.103556	0.857143
747	Flamprop	1	3	3	3	Good	-0.772463	In	11	0.103556	0.857143
748	Flamprop-isopropyl	1	3	3	3	Good	-0.772463	In	11	0.103556	0.857143
749	Flamprop-methyl	1	3	3	3	Good	-0.772463	In	11	0.103556	0.857143
750	Flamprop-M-isopropyl	1	3	3	3	Good	-0.772463	In	11	0.103556	0.857143
751	Flamprop-M-methyl	1	3	3	3	Good	-0.772463	In	11	0.103556	0.857143
760	Fluacrypyrim	1	3	3	3	Good	-0.772463	In	11	0.103556	0.857143
787	Flufenoxystrobin	1	3	3	3	Good	-0.772463	In	11	0.103556	0.857143
791	Flufiprole	1	3	3	3	Good	-0.772463	In	11	0.103556	0.857143
812	Fluoronitrofen	1	3	3	3	Good	-0.772463	In	11	0.103556	0.857143
837	Flurtamone	1	3	3	3	Good	-0.772463	In	11	0.103556	0.857143
865	Fufenozide	1	3	3	3	Good	-0.772463	In	11	0.103556	0.857143
878	Furyloxyfen	1	3	3	3	Good	-0.772463	In	11	0.103556	0.857143
901	Halofenozide	1	3	3	3	Good	-0.772463	In	11	0.103556	0.857143
919	Hexaflumuron	1	3	3	3	Good	-0.772463	In	11	0.103556	0.857143
940	Imazaquin	1	3	3	3	Good	-0.772463	In	11	0.103556	0.857143
941	Imazaquin methyl	1	3	3	3	Good	-0.772463	In	11	0.103556	0.857143
952	Indanofan	1	3	3	3	Good	-0.772463	In	11	0.103556	0.857143
1008	Isoxachlortole	1	3	3	3	Good	-0.772463	In	11	0.103556	0.857143
1009	Isoxadifen	1	3	3	3	Good	-0.772463	In	11	0.103556	0.857143
1010	Isoxadifen ethyl	1	3	3	3	Good	-0.772463	In	11	0.103556	0.857143
1011	Isoxaflutole	1	3	3	3	Good	-0.772463	In	11	0.103556	0.857143
1024	Kresoxim-methyl	1	3	3	3	Good	-0.772463	In	11	0.103556	0.857143
1036	Lufenuron	1	3	3	3	Good	-0.772463	In	11	0.103556	0.857143
1124	Methoxyfenozide	1	3	3	3	Good	-0.772463	In	11	0.103556	0.857143
1141	Metominostrobin	1	3	3	3	Good	-0.772463	In	11	0.103556	0.857143
1155	Mivorilaner	1	3	3	3	Good	-0.772463	In	11	0.103556	0.857143
1166	Morfamquat	1	3	3	3	Good	-0.772463	In	11	0.103556	0.857143
1194	Nitrofen	1	3	3	3	Good	-0.772463	In	11	0.103556	0.857143
1204	Novaluron	1	3	3	3	Good	-0.772463	In	11	0.103556	0.857143
1205	Noviflumuron	1	3	3	3	Good	-0.772463	In	11	0.103556	0.857143
1234	Oxyfluorfen	1	3	3	3	Good	-0.772463	In	11	0.103556	0.857143
1246	Penfluron	1	3	3	3	Good	-0.772463	In	11	0.103556	0.857143
1256	Phenisopham	1	3	3	3	Good	-0.772463	In	11	0.103556	0.857143
1258	Phenobenzuron	1	3	3	3	Good	-0.772463	In	11	0.103556	0.857143
1278	Picoxystrobin	1	3	3	3	Good	-0.772463	In	11	0.103556	0.857143
1318	Propamidine	1	3	3	3	Good	-0.772463	In	11	0.103556	0.857143
1362	Pyrapropoyne	1	3	3	3	Good	-0.772463	In	11	0.103556	0.857143
1373	Pyribencarb	1	3	3	3	Good	-0.772463	In	11	0.103556	0.857143
1384	Pyrifluquinazon	1	3	3	3	Good	-0.772463	In	11	0.103556	0.857143
1388	Pyriminobac-methyl	1	3	3	3	Good	-0.772463	In	11	0.103556	0.857143
1390	Pyrimisulfan	1	3	3	3	Good	-0.772463	In	11	0.103556	0.857143
1413	Quintrione	1	3	3	3	Good	-0.772463	In	11	0.103556	0.857143
1487	Tebufenozide	1	3	3	3	Good	-0.772463	In	11	0.103556	0.857143
1493	Tecloftalam	1	3	3	3	Good	-0.772463	In	11	0.103556	0.857143
1495	Teflubenzuron	1	3	3	3	Good	-0.772463	In	11	0.103556	0.857143
1510	Tetflupyrolimet	1	3	3	3	Good	-0.772463	In	11	0.103556	0.857143
1564	Tralocythrin	1	3	3	3	Good	-0.772463	In	11	0.103556	0.857143
1565	Tralomethrin	1	3	3	3	Good	-0.772463	In	11	0.103556	0.857143
1596	Tricyclazole	1	3	3	3	Good	-0.772463	In	11	0.103556	0.857143
1608	Triflumuron	1	3	3	3	Good	-0.772463	In	11	0.103556	0.857143
1612	Trifopsime	1	3	3	3	Good	-0.772463	In	11	0.103556	0.857143
67	Acifluorfen	1	3	3	3	Good	-0.903675	In	11	0.155334	0.8
68	Acifluorfen-methyl	1	3	3	3	Good	-0.903675	In	11	0.155334	0.8
195	Bifenox	1	3	3	3	Good	-0.903675	In	11	0.155334	0.8
361	Chlorsulfuron	1	3	3	3	Good	-0.903675	In	11	0.155334	0.8
374	Cinosulfuron	1	3	3	3	Good	-0.903675	In	11	0.155334	0.8
440	Cyflumetofen	1	3	3	3	Good	-0.903675	In	11	0.155334	0.8
442	Cyhalodiamide	1	3	3	3	Good	-0.903675	In	11	0.155334	0.8
553	Diflufenzopyr	1	3	3	3	Good	-0.903675	In	11	0.155334	0.8
668	Ethoxysulfuron	1	3	3	3	Good	-0.903675	In	11	0.155334	0.8
752	Flazasulfuron	1	3	3	3	Good	-0.903675	In	11	0.155334	0.8
770	Flubenzimine	1	3	3	3	Good	-0.903675	In	11	0.155334	0.8
832	Fluridone	1	3	3	3	Good	-0.903675	In	11	0.155334	0.8
846	Fluxametamide	1	3	3	3	Good	-0.903675	In	11	0.155334	0.8
864	Fuberidazole	1	3	3	3	Good	-0.903675	In	11	0.155334	0.8
903	Halosulfuron-methyl	1	3	3	3	Good	-0.903675	In	11	0.155334	0.8
965	Iofensulfuron	1	3	3	3	Good	-0.903675	In	11	0.155334	0.8
970	Ipfencarbazone	1	3	3	3	Good	-0.903675	In	11	0.155334	0.8
984	Isocycloseram	1	3	3	3	Good	-0.903675	In	11	0.155334	0.8
1044	Mandipropamid	1	3	3	3	Good	-0.903675	In	11	0.155334	0.8
1100	Metarylpicoxamid	1	3	3	3	Good	-0.903675	In	11	0.155334	0.8
1102	Metazosulfuron	1	3	3	3	Good	-0.903675	In	11	0.155334	0.8
1186	Niclosamide	1	3	3	3	Good	-0.903675	In	11	0.155334	0.8
1339	Prosulfuron	1	3	3	3	Good	-0.903675	In	11	0.155334	0.8
1368	Pyrazosulfuron	1	3	3	3	Good	-0.903675	In	11	0.155334	0.8
1369	Pyrazosulfuron-ethyl	1	3	3	3	Good	-0.903675	In	11	0.155334	0.8
1415	Rabenzazole	1	3	3	3	Good	-0.903675	In	11	0.155334	0.8
1441	Sintofen	1	3	3	3	Good	-0.903675	In	11	0.155334	0.8
1521	Thiabendazole	1	3	3	3	Good	-0.903675	In	11	0.155334	0.8
1532	Thifensulfuron	1	3	3	3	Good	-0.903675	In	11	0.155334	0.8
1533	Thifensulfuron-methyl	1	3	3	3	Good	-0.903675	In	11	0.155334	0.8
1559	Tolpyralate	1	3	3	3	Good	-0.903675	In	11	0.155334	0.8
1574	Triafamone	1	3	3	3	Good	-0.903675	In	11	0.155334	0.8
1580	Triasulfuron	1	3	3	3	Good	-0.903675	In	11	0.155334	0.8
1602	Trifloxystrobin	1	3	3	3	Good	-0.903675	In	11	0.155334	0.8
1603	Trifloxysulfuron	1	3	3	3	Good	-0.903675	In	11	0.155334	0.8
1621	Tritosulfuron	1	3	3	3	Good	-0.903675	In	11	0.155334	0.8
162	Bensulfuron	1	3	3	3	Good	-1.03489	In	11	0.207112	0.75
163	Bensulfuron-methyl	1	3	3	3	Good	-1.03489	In	11	0.207112	0.75
165	Bensultap	1	3	3	3	Good	-1.03489	In	11	0.207112	0.75
220	Bromethalin	1	3	3	3	Good	-1.03489	In	11	0.207112	0.75
320	Chlorfenazole	1	3	3	3	Good	-1.03489	In	11	0.207112	0.75
334	Chlorimuron	1	3	3	3	Good	-1.03489	In	11	0.207112	0.75
335	Chlorimuron-ethyl	1	3	3	3	Good	-1.03489	In	11	0.207112	0.75
410	Coumethoxystrobin	1	3	3	3	Good	-1.03489	In	11	0.207112	0.75
412	Coumoxystrobin	1	3	3	3	Good	-1.03489	In	11	0.207112	0.75
434	Cyclosulfamuron	1	3	3	3	Good	-1.03489	In	11	0.207112	0.75
460	Cyprosulfamide	1	3	3	3	Good	-1.03489	In	11	0.207112	0.75
648	Ethametsulfuron-methyl	1	3	3	3	Good	-1.03489	In	11	0.207112	0.75
691	Fenasulam	1	3	3	3	Good	-1.03489	In	11	0.207112	0.75
766	Fluazinam	1	3	3	3	Good	-1.03489	In	11	0.207112	0.75
768	Flubendiamide	1	3	3	3	Good	-1.03489	In	11	0.207112	0.75
772	Flucetosulfuron	1	3	3	3	Good	-1.03489	In	11	0.207112	0.75
793	Flumetralin	1	3	3	3	Good	-1.03489	In	11	0.207112	0.75
808	Fluorodifen	1	3	3	3	Good	-1.03489	In	11	0.207112	0.75
809	Fluoroglycofen	1	3	3	3	Good	-1.03489	In	11	0.207112	0.75
826	Flupyrsulfuron	1	3	3	3	Good	-1.03489	In	11	0.207112	0.75
827	Flupyrsulfuron-methyl-sodium	1	3	3	3	Good	-1.03489	In	11	0.207112	0.75
839	Flusulfamide	1	3	3	3	Good	-1.03489	In	11	0.207112	0.75
957	Indoxacarb	1	3	3	3	Good	-1.03489	In	11	0.207112	0.75
963	Iodosulfuron	1	3	3	3	Good	-1.03489	In	11	0.207112	0.75
964	Iodosulfuron-methyl-sodium	1	3	3	3	Good	-1.03489	In	11	0.207112	0.75
1025	Lactofen	1	3	3	3	Good	-1.03489	In	11	0.207112	0.75
1104	Metcamifen	1	3	3	3	Good	-1.03489	In	11	0.207112	0.75
1115	Methiopyrsulfuron	1	3	3	3	Good	-1.03489	In	11	0.207112	0.75
1126	Methyl (((1-(5-(2-chloro-4-(trifluoromethyl)phenoxy)-2-nitrophenyl)-2-methoxyethylidene)amino)oxy)acetate	1	3	3	3	Good	-1.03489	In	11	0.207112	0.75
1148	Metsulfuron	1	3	3	3	Good	-1.03489	In	11	0.207112	0.75
1149	Metsulfuron-methyl	1	3	3	3	Good	-1.03489	In	11	0.207112	0.75
1163	Monosulfuron-methyl	1	3	3	3	Good	-1.03489	In	11	0.207112	0.75
1188	Nicosulfuron	1	3	3	3	Good	-1.03489	In	11	0.207112	0.75
1215	Orthosulfamuron	1	3	3	3	Good	-1.03489	In	11	0.207112	0.75
1224	Oxasulfuron	1	3	3	3	Good	-1.03489	In	11	0.207112	0.75
1252	Perfluidone	1	3	3	3	Good	-1.03489	In	11	0.207112	0.75
1297	Primisulfuron	1	3	3	3	Good	-1.03489	In	11	0.207112	0.75
1298	Primisulfuron methyl	1	3	3	3	Good	-1.03489	In	11	0.207112	0.75
1447	Sodium lignosulfonate	1	3	3	3	Good	-1.03489	In	11	0.207112	0.75
1448	Sodium metabisulphite	1	3	3	3	Good	-1.03489	In	11	0.207112	0.75
1472	Sulfometuron	1	3	3	3	Good	-1.03489	In	11	0.207112	0.75
1473	Sulfometuron-methyl	1	3	3	3	Good	-1.03489	In	11	0.207112	0.75
1553	Tioxazafen	1	3	3	3	Good	-1.03489	In	11	0.207112	0.75
1584	Triazoxide	1	3	3	3	Good	-1.03489	In	11	0.207112	0.75
1585	Tribenuron	1	3	3	3	Good	-1.03489	In	11	0.207112	0.75
1586	Tribenuron-methyl	1	3	3	3	Good	-1.03489	In	11	0.207112	0.75
1610	Triflusulfuron	1	3	3	3	Good	-1.03489	In	11	0.207112	0.75
1611	Triflusulfuron-methyl	1	3	3	3	Good	-1.03489	In	11	0.207112	0.75
2	(E)-2-(2-(2-(2,3-dichlorophenylamino)-6-trifluoromethylpyrimidin-4-yloxymethyl)phenyl)-3-methoxyacrylate	1	3	3	3	Good	-1.04637	In	27	0.339052	0.745455
4	(R)-flutriafol	1	3	3	3	Good	-1.1661	In	11	0.25889	0.705882
6	(S)-flutriafol	1	3	3	3	Good	-1.1661	In	11	0.25889	0.705882
209	Bitertanol	1	3	3	3	Good	-1.1661	In	11	0.25889	0.705882
543	Difenoconazole	1	3	3	3	Good	-1.1661	In	11	0.25889	0.705882
547	Difenzoquat	1	3	3	3	Good	-1.1661	In	11	0.25889	0.705882
548	Difenzoquat metilsulfate	1	3	3	3	Good	-1.1661	In	11	0.25889	0.705882
635	Epoxiconazole	1	3	3	3	Good	-1.1661	In	11	0.25889	0.705882
692	Fenazaflor	1	3	3	3	Good	-1.1661	In	11	0.25889	0.705882
693	Fenazaquin	1	3	3	3	Good	-1.1661	In	11	0.25889	0.705882
696	Fenchlorazole-ethyl	1	3	3	3	Good	-1.1661	In	11	0.25889	0.705882
715	Fenoxaprop-ethyl	1	3	3	3	Good	-1.1661	In	11	0.25889	0.705882
716	Fenoxaprop-P	1	3	3	3	Good	-1.1661	In	11	0.25889	0.705882
717	Fenoxaprop-P-ethyl	1	3	3	3	Good	-1.1661	In	11	0.25889	0.705882
721	Fenpicoxamid	1	3	3	3	Good	-1.1661	In	11	0.25889	0.705882
729	Fenquinotrione	1	3	3	3	Good	-1.1661	In	11	0.25889	0.705882
734	Fenthiaprop	1	3	3	3	Good	-1.1661	In	11	0.25889	0.705882
735	Fenthiaprop ethyl	1	3	3	3	Good	-1.1661	In	11	0.25889	0.705882
838	Flusilazole	1	3	3	3	Good	-1.1661	In	11	0.25889	0.705882
844	Flutriafol	1	3	3	3	Good	-1.1661	In	11	0.25889	0.705882
850	Fomesafen	1	3	3	3	Good	-1.1661	In	11	0.25889	0.705882
852	Foramsulfuron	1	3	3	3	Good	-1.1661	In	11	0.25889	0.705882
902	Halosafen	1	3	3	3	Good	-1.1661	In	11	0.25889	0.705882
953	Indazapyroxamet	1	3	3	3	Good	-1.1661	In	11	0.25889	0.705882
955	Indolauxipyr	1	3	3	3	Good	-1.1661	In	11	0.25889	0.705882
971	Ipfentrifluconazole	1	3	3	3	Good	-1.1661	In	11	0.25889	0.705882
972	Ipflufenoquin	1	3	3	3	Good	-1.1661	In	11	0.25889	0.705882
1076	Mefenacet	1	3	3	3	Good	-1.1661	In	11	0.25889	0.705882
1079	Mefentrifluconazole	1	3	3	3	Good	-1.1661	In	11	0.25889	0.705882
1162	Monosulfuron	1	3	3	3	Good	-1.1661	In	11	0.25889	0.705882
1410	Quinoxyfen	1	3	3	3	Good	-1.1661	In	11	0.25889	0.705882
1418	Rimisoxafen	1	3	3	3	Good	-1.1661	In	11	0.25889	0.705882
1419	Rimsulfuron	1	3	3	3	Good	-1.1661	In	11	0.25889	0.705882
211	Bixafen	1	3	3	3	Good	-1.29731	In	11	0.310668	0.666667
386	Clofentezine	1	3	3	3	Good	-1.29731	In	11	0.310668	0.666667
528	Diclosulam	1	3	3	3	Good	-1.29731	In	11	0.310668	0.666667
550	Diflovidazin	1	3	3	3	Good	-1.29731	In	11	0.310668	0.666667
680	Etofenprox	1	3	3	3	Good	-1.29731	In	11	0.310668	0.666667
690	Fenarimol	1	3	3	3	Good	-1.29731	In	11	0.310668	0.666667
694	Fenbuconazole	1	3	3	3	Good	-1.29731	In	11	0.310668	0.666667
754	Flometoquin	1	3	3	3	Good	-1.29731	In	11	0.310668	0.666667
756	Florasulam	1	3	3	3	Good	-1.29731	In	11	0.310668	0.666667
769	Flubeneteram	1	3	3	3	Good	-1.29731	In	11	0.310668	0.666667
785	Flufenoxadiazam	1	3	3	3	Good	-1.29731	In	11	0.310668	0.666667
788	Flufenprox	1	3	3	3	Good	-1.29731	In	11	0.310668	0.666667
794	Flumetsulam	1	3	3	3	Good	-1.29731	In	11	0.310668	0.666667
819	Flupoxam	1	3	3	3	Good	-1.29731	In	11	0.310668	0.666667
847	Fluxapyroxad	1	3	3	3	Good	-1.29731	In	11	0.310668	0.666667
900	Halfenprox	1	3	3	3	Good	-1.29731	In	11	0.310668	0.666667
945	Imibenconazole	1	3	3	3	Good	-1.29731	In	11	0.310668	0.666667
956	Indolauxipyr-cyanomethyl	1	3	3	3	Good	-1.29731	In	11	0.310668	0.666667
1090	Mesosulfuron	1	3	3	3	Good	-1.29731	In	11	0.310668	0.666667
1091	Mesosulfuron-methyl	1	3	3	3	Good	-1.29731	In	11	0.310668	0.666667
1142	Metosulam	1	3	3	3	Good	-1.29731	In	11	0.310668	0.666667
1180	Naproanilide	1	3	3	3	Good	-1.29731	In	11	0.310668	0.666667
1187	Nicofluprole	1	3	3	3	Good	-1.29731	In	11	0.310668	0.666667
1206	Nuarimol	1	3	3	3	Good	-1.29731	In	11	0.310668	0.666667
1239	Parinol	1	3	3	3	Good	-1.29731	In	11	0.310668	0.666667
1247	Penoxsulam	1	3	3	3	Good	-1.29731	In	11	0.310668	0.666667
1345	Protrifenbute	1	3	3	3	Good	-1.29731	In	11	0.310668	0.666667
1355	Pyraclostrobin	1	3	3	3	Good	-1.29731	In	11	0.310668	0.666667
1357	Pyrafluprole	1	3	3	3	Good	-1.29731	In	11	0.310668	0.666667
1359	Pyrametostrobin	1	3	3	3	Good	-1.29731	In	11	0.310668	0.666667
1377	Pyridachlometyl	1	3	3	3	Good	-1.29731	In	11	0.310668	0.666667
1394	Pyriproxyfen	1	3	3	3	Good	-1.29731	In	11	0.310668	0.666667
1399	Pyroxsulam	1	3	3	3	Good	-1.29731	In	11	0.310668	0.666667
1407	Quinofumelin	1	3	3	3	Good	-1.29731	In	11	0.310668	0.666667
1414	Quizalofop-ethyl	1	3	3	3	Good	-1.29731	In	11	0.310668	0.666667
1433	Silafluofen	1	3	3	3	Good	-1.29731	In	11	0.310668	0.666667
1550	Tigolaner	1	3	3	3	Good	-1.29731	In	11	0.310668	0.666667
1579	Triarimol	1	3	3	3	Good	-1.29731	In	11	0.310668	0.666667
1600	Trifenmorph	1	3	3	3	Good	-1.29731	In	11	0.310668	0.666667
108	Aminopyrofen	1	2	3	3	Good	-1.42853	In	13	0.337321	0.6
110	Amisulbrom	1	2	3	3	Good	-1.42853	In	13	0.337321	0.6
134	Azimsulfuron	1	2	3	3	Good	-1.42853	In	13	0.337321	0.6
180	Benzofenap	1	2	3	3	Good	-1.42853	In	13	0.337321	0.6
205	Bispyribac	1	2	3	3	Good	-1.42853	In	13	0.337321	0.6
213	Boscalid	1	2	3	3	Good	-1.42853	In	13	0.337321	0.6
304	Chlorantraniliprole	1	2	3	3	Good	-1.42853	In	13	0.337321	0.6
397	Cloransulam	1	2	3	3	Good	-1.42853	In	13	0.337321	0.6
426	Cyclaniliprole	1	2	3	3	Good	-1.42853	In	13	0.337321	0.6
527	Dicloromezotiaz	1	2	3	3	Good	-1.42853	In	13	0.337321	0.6
552	Diflufenican	1	2	3	3	Good	-1.42853	In	13	0.337321	0.6
728	Fenpyroximate	1	2	3	3	Good	-1.42853	In	13	0.337321	0.6
758	Florpyrauxifen-benzyl	1	2	3	3	Good	-1.42853	In	13	0.337321	0.6
761	Fluazaindolizine	1	2	3	3	Good	-1.42853	In	13	0.337321	0.6
776	Fluchlordiniliprole	1	2	3	3	Good	-1.42853	In	13	0.337321	0.6
828	Fluquinconazole	1	2	3	3	Good	-1.42853	In	13	0.337321	0.6
944	Imazosulfuron	1	2	3	3	Good	-1.42853	In	13	0.337321	0.6
951	Inabenfide	1	2	3	3	Good	-1.42853	In	13	0.337321	0.6
1150	Metyltetraprole	1	2	3	3	Good	-1.42853	In	13	0.337321	0.6
1183	Naptalam	1	2	3	3	Good	-1.42853	In	13	0.337321	0.6
1273	Picarbutrazox	1	2	3	3	Good	-1.42853	In	13	0.337321	0.6
1277	Picolinafen	1	2	3	3	Good	-1.42853	In	13	0.337321	0.6
1322	Propaquizafop	1	2	3	3	Good	-1.42853	In	13	0.337321	0.6
1335	Propyrisulfuron	1	2	3	3	Good	-1.42853	In	13	0.337321	0.6
1361	Pyraoxystrobin	1	2	3	3	Good	-1.42853	In	13	0.337321	0.6
1365	Pyraziflumid	1	2	3	3	Good	-1.42853	In	13	0.337321	0.6
1370	Pyrazoxyfen	1	2	3	3	Good	-1.42853	In	13	0.337321	0.6
1371	Pyribambenz-isopropyl	1	2	3	3	Good	-1.42853	In	13	0.337321	0.6
1372	Pyribambenz-propyl	1	2	3	3	Good	-1.42853	In	13	0.337321	0.6
1404	Quinconazole	1	2	3	3	Good	-1.42853	In	13	0.337321	0.6
1478	Sulphaquinoxaline	1	2	3	3	Good	-1.42853	In	13	0.337321	0.6
1552	Tiorantraniliprole	1	2	3	3	Good	-1.42853	In	13	0.337321	0.6
202	Bipyrazone	1	2	3	3	Good	-1.55974	In	13	0.365348	0.576923
215	Broflanilide	1	2	3	3	Good	-1.55974	In	13	0.365348	0.576923
216	Brofluthrinate	1	2	3	3	Good	-1.55974	In	13	0.365348	0.576923
271	Cambendichlor	1	2	3	3	Good	-1.55974	In	13	0.365348	0.576923
328	Chlorfluazuron	1	2	3	3	Good	-1.55974	In	13	0.365348	0.576923
422	Cyantraniliprole	1	2	3	3	Good	-1.55974	In	13	0.365348	0.576923
432	Cycloprothrin	1	2	3	3	Good	-1.55974	In	13	0.365348	0.576923
457	Cyproflanilide	1	2	3	3	Good	-1.55974	In	13	0.365348	0.576923
640	Esfenvalerate	1	2	3	3	Good	-1.55974	In	13	0.365348	0.576923
684	Famoxadone	1	2	3	3	Good	-1.55974	In	13	0.365348	0.576923
727	Fenpyrazone	1	2	3	3	Good	-1.55974	In	13	0.365348	0.576923
742	Fenvalerate	1	2	3	3	Good	-1.55974	In	13	0.365348	0.576923
779	Flucythrinate	1	2	3	3	Good	-1.55974	In	13	0.365348	0.576923
786	Flufenoxuron	1	2	3	3	Good	-1.55974	In	13	0.365348	0.576923
815	Fluoxapiprolin	1	2	3	3	Good	-1.55974	In	13	0.365348	0.576923
816	Fluoxastrobin	1	2	3	3	Good	-1.55974	In	13	0.365348	0.576923
845	Fluvalinate	1	2	3	3	Good	-1.55974	In	13	0.365348	0.576923
1156	Modoflaner	1	2	3	3	Good	-1.55974	In	13	0.365348	0.576923
1226	Oxazosulfyl	1	2	3	3	Good	-1.55974	In	13	0.365348	0.576923
1366	Pyrazolynate	1	2	3	3	Good	-1.55974	In	13	0.365348	0.576923
1389	Pyriminostrobin	1	2	3	3	Good	-1.55974	In	13	0.365348	0.576923
1483	Tau-fluvalinate	1	2	3	3	Good	-1.55974	In	13	0.365348	0.576923
1606	Triflumezopyrim	1	2	3	3	Good	-1.55974	In	13	0.365348	0.576923
143	Azoxystrobin	1	2	2	2	Moderate	-1.69095	In	13	0.396925	0.555556
342	Chlorophacinone	1	2	2	2	Moderate	-1.69095	In	13	0.396925	0.555556
584	Dinofenate	1	2	2	2	Moderate	-1.69095	In	13	0.396925	0.555556
595	Diphacinone	1	2	2	2	Moderate	-1.69095	In	13	0.396925	0.555556
759	Florylpicoxamid	1	2	2	2	Moderate	-1.69095	In	13	0.396925	0.555556
778	Flucycloxuron	1	2	2	2	Moderate	-1.69095	In	13	0.396925	0.555556
817	Fluoxytioconazole	1	2	2	2	Moderate	-1.69095	In	13	0.396925	0.555556
870	Furalaxyl-M	1	2	2	2	Moderate	-1.69095	In	13	0.396925	0.555556
1093	Metaflumizone	1	2	2	2	Moderate	-1.69095	In	13	0.396925	0.555556
1466	Sulcofuron	1	2	2	2	Moderate	-1.69095	In	13	0.396925	0.555556
1467	Sulcofuron-sodium	1	2	2	2	Moderate	-1.69095	In	13	0.396925	0.555556
1474	Sulfosulfuron	1	2	2	2	Moderate	-1.69095	In	13	0.396925	0.555556
521	Diclobutrazol	1	2	2	2	Moderate	-1.82216	In	13	0.431272	0.535714
867	Fuphenthiourea	1	2	2	2	Moderate	-1.82216	In	13	0.431272	0.535714
1409	Pyrafluprole	1	2	3	3	Good	-1.35817	In	12	0.310668	0.666667
1411	Pyrametostrobin	1	2	3	3	Good	-1.35817	In	12	0.310668	0.666667
1429	Pyridachlometyl	1	2	3	3	Good	-1.35817	In	12	0.310668	0.666667
1446	Pyriproxyfen	1	2	3	3	Good	-1.35817	In	12	0.310668	0.666667
1451	Pyroxsulam	1	2	3	3	Good	-1.35817	In	12	0.310668	0.666667
1459	Quinofumelin	1	2	3	3	Good	-1.35817	In	12	0.310668	0.666667
1466	Quizalofop-ethyl	1	2	3	3	Good	-1.35817	In	12	0.310668	0.666667
1485	Silafluofen	1	2	3	3	Good	-1.35817	In	12	0.310668	0.666667
1603	Tigolaner	1	2	3	3	Good	-1.35817	In	12	0.310668	0.666667
1632	Triarimol	1	2	3	3	Good	-1.35817	In	12	0.310668	0.666667
1654	Trifenmorph	1	2	3	3	Good	-1.35817	In	12	0.310668	0.666667
620	Diphacinone sodium	1	2	2	2	Moderate	-1.36488	In	28	0.387488	0.719298
114	Aminopyrofen	1	2	3	3	Good	-1.49519	In	14	0.337321	0.6
116	Amisulbrom	1	2	3	3	Good	-1.49519	In	14	0.337321	0.6
143	Azimsulfuron	1	2	3	3	Good	-1.49519	In	14	0.337321	0.6
191	Benzofenap	1	2	3	3	Good	-1.49519	In	14	0.337321	0.6
217	Bispyribac	1	2	3	3	Good	-1.49519	In	14	0.337321	0.6
218	Bispyribac-sodium	1	2	3	3	Good	-1.49519	In	14	0.337321	0.6
226	Boscalid	1	2	3	3	Good	-1.49519	In	14	0.337321	0.6
321	Chlorantraniliprole	1	2	3	3	Good	-1.49519	In	14	0.337321	0.6
417	Cloransulam	1	2	3	3	Good	-1.49519	In	14	0.337321	0.6
449	Cyclaniliprole	1	2	3	3	Good	-1.49519	In	14	0.337321	0.6
551	Dicloromezotiaz	1	2	3	3	Good	-1.49519	In	14	0.337321	0.6
576	Diflufenican	1	2	3	3	Good	-1.49519	In	14	0.337321	0.6
756	Fenpyroximate	1	2	3	3	Good	-1.49519	In	14	0.337321	0.6
767	Fentin acetate	1	2	3	3	Good	-1.49519	In	14	0.337321	0.6
789	Florpyrauxifen-benzyl	1	2	3	3	Good	-1.49519	In	14	0.337321	0.6
792	Fluazaindolizine	1	2	3	3	Good	-1.49519	In	14	0.337321	0.6
808	Fluchlordiniliprole	1	2	3	3	Good	-1.49519	In	14	0.337321	0.6
861	Fluquinconazole	1	2	3	3	Good	-1.49519	In	14	0.337321	0.6
982	Imazosulfuron	1	2	3	3	Good	-1.49519	In	14	0.337321	0.6
989	Inabenfide	1	2	3	3	Good	-1.49519	In	14	0.337321	0.6
1197	Metyltetraprole	1	2	3	3	Good	-1.49519	In	14	0.337321	0.6
1232	Naptalam	1	2	3	3	Good	-1.49519	In	14	0.337321	0.6
1325	Picarbutrazox	1	2	3	3	Good	-1.49519	In	14	0.337321	0.6
1329	Picolinafen	1	2	3	3	Good	-1.49519	In	14	0.337321	0.6
1374	Propaquizafop	1	2	3	3	Good	-1.49519	In	14	0.337321	0.6
1387	Propyrisulfuron	1	2	3	3	Good	-1.49519	In	14	0.337321	0.6
1413	Pyraoxystrobin	1	2	3	3	Good	-1.49519	In	14	0.337321	0.6
1417	Pyraziflumid	1	2	3	3	Good	-1.49519	In	14	0.337321	0.6
1422	Pyrazoxyfen	1	2	3	3	Good	-1.49519	In	14	0.337321	0.6
1423	Pyribambenz-isopropyl	1	2	3	3	Good	-1.49519	In	14	0.337321	0.6
1424	Pyribambenz-propyl	1	2	3	3	Good	-1.49519	In	14	0.337321	0.6
1456	Quinconazole	1	2	3	3	Good	-1.49519	In	14	0.337321	0.6
1530	Sulphaquinoxaline	1	2	3	3	Good	-1.49519	In	14	0.337321	0.6
1605	Tiorantraniliprole	1	2	3	3	Good	-1.49519	In	14	0.337321	0.6
213	Bipyrazone	1	2	3	3	Good	-1.63221	In	14	0.365348	0.576923
228	Broflanilide	1	2	3	3	Good	-1.63221	In	14	0.365348	0.576923
229	Brofluthrinate	1	2	3	3	Good	-1.63221	In	14	0.365348	0.576923
287	Cambendichlor	1	2	3	3	Good	-1.63221	In	14	0.365348	0.576923
346	Chlorfluazuron	1	2	3	3	Good	-1.63221	In	14	0.365348	0.576923
445	Cyantraniliprole	1	2	3	3	Good	-1.63221	In	14	0.365348	0.576923
455	Cycloprothrin	1	2	3	3	Good	-1.63221	In	14	0.365348	0.576923
481	Cyproflanilide	1	2	3	3	Good	-1.63221	In	14	0.365348	0.576923
666	Esfenvalerate	1	2	3	3	Good	-1.63221	In	14	0.365348	0.576923
710	Famoxadone	1	2	3	3	Good	-1.63221	In	14	0.365348	0.576923
755	Fenpyrazone	1	2	3	3	Good	-1.63221	In	14	0.365348	0.576923
773	Fenvalerate	1	2	3	3	Good	-1.63221	In	14	0.365348	0.576923
811	Flucythrinate	1	2	3	3	Good	-1.63221	In	14	0.365348	0.576923
818	Flufenoxuron	1	2	3	3	Good	-1.63221	In	14	0.365348	0.576923
847	Fluoxapiprolin	1	2	3	3	Good	-1.63221	In	14	0.365348	0.576923
848	Fluoxastrobin	1	2	3	3	Good	-1.63221	In	14	0.365348	0.576923
878	Fluvalinate	1	2	3	3	Good	-1.63221	In	14	0.365348	0.576923
1203	Modoflaner	1	2	3	3	Good	-1.63221	In	14	0.365348	0.576923
1275	Oxazosulfyl	1	2	3	3	Good	-1.63221	In	14	0.365348	0.576923
1418	Pyrazolynate	1	2	3	3	Good	-1.63221	In	14	0.365348	0.576923
1441	Pyriminostrobin	1	2	3	3	Good	-1.63221	In	14	0.365348	0.576923
1535	Tau-fluvalinate	1	2	3	3	Good	-1.63221	In	14	0.365348	0.576923
1660	Triflumezopyrim	1	2	3	3	Good	-1.63221	In	14	0.365348	0.576923
153	Azoxystrobin	1	2	2	2	Moderate	-1.76924	In	14	0.396925	0.555556
360	Chlorophacinone	1	2	2	2	Moderate	-1.76924	In	14	0.396925	0.555556
608	Dinofenate	1	2	2	2	Moderate	-1.76924	In	14	0.396925	0.555556
619	Diphacinone	1	2	2	2	Moderate	-1.76924	In	14	0.396925	0.555556
790	Florylpicoxamid	1	2	2	2	Moderate	-1.76924	In	14	0.396925	0.555556
810	Flucycloxuron	1	2	2	2	Moderate	-1.76924	In	14	0.396925	0.555556
849	Fluoxytioconazole	1	2	2	2	Moderate	-1.76924	In	14	0.396925	0.555556
904	Furalaxyl-M	1	2	2	2	Moderate	-1.76924	In	14	0.396925	0.555556
1137	Metaflumizone	1	2	2	2	Moderate	-1.76924	In	14	0.396925	0.555556
1518	Sulcofuron	1	2	2	2	Moderate	-1.76924	In	14	0.396925	0.555556
1519	Sulcofuron-sodium	1	2	2	2	Moderate	-1.76924	In	14	0.396925	0.555556
1526	Sulfosulfuron	1	2	2	2	Moderate	-1.76924	In	14	0.396925	0.555556
545	Diclobutrazol	1	2	2	2	Moderate	-1.90626	In	14	0.431272	0.535714
901	Fuphenthiourea	1	2	2	2	Moderate	-1.90626	In	14	0.431272	0.535714
846	Fluotrimazole	1	2	1	1	Bad/Unreliable	-2.04328	Outside AD	14	0.46778	0.517241
1142	Metamifop	1	2	1	1	Bad/Unreliable	-2.04328	Outside AD	14	0.46778	0.517241
1631	Triarathene	1	2	1	1	Bad/Unreliable	-2.04328	Outside AD	14	0.46778	0.517241
227	Brodifacoum	1	2	1	1	Bad/Unreliable	-2.04998	Outside AD	28	0.629667	0.61194
232	Bromadiolone	1	2	1	1	Bad/Unreliable	-2.04998	Outside AD	28	0.629667	0.61194
566	Difenacoum	1	2	1	1	Bad/Unreliable	-2.04998	Outside AD	28	0.629667	0.61194
784	Flocoumafen	1	2	1	1	Bad/Unreliable	-2.04998	Outside AD	28	0.629667	0.61194
23	10,10'-oxybisphenoxarsine	1	2	1	1	Bad/Unreliable	-2.1803	Outside AD	14	0.505982	0.5
1569	Tetraniliprole	1	1	1	1	Bad/Unreliable	-2.31732	Outside AD	14	0.545521	0.483871
1673	Tripyrasulfone	1	1	1	1	Bad/Unreliable	-2.31732	Outside AD	14	0.545521	0.483871
1249	Norbormide	1	1	1	1	Bad/Unreliable	-2.32402	Outside AD	28	0.726539	0.577465
573	Difethialone	1	1	1	1	Bad/Unreliable	-2.45434	Outside AD	14	0.586127	0.46875
1453	Quinacetol sulphate	1	1	1	1	Bad/Unreliable	-2.45434	Outside AD	14	0.586127	0.46875
1426	Pyribenzoxim	1	1	1	1	Bad/Unreliable	-3.27647	Outside AD	14	0.843303	0.394737
721	Fenbutatin oxide	1	1	1	1	Bad/Unreliable	-3.82455	Outside AD	14	1.02165	0.357143

## Sheet: PRI  Result of model M3 
No.	Chemical name	Score(MAE-LOO)	Score(Proximity Train YObs Mean)	Score(Similarity based AD)	CompositeScore	PredictionQuality	YPred(Test)	AD status	Closest Training Compound	Euclidean Distance	Generalized Jaccard Coeff.
1153	Mipafox	1	2	3	2	Moderate	3.10246	In	31	0.440847	0.650727
262	Cadusafos	1	2	3	2	Moderate	2.99135	In	31	0.379781	0.791497
922	Hexylthiofos	1	2	3	2	Moderate	2.84383	In	31	0.413236	0.704781
1106	Metepa	1	2	3	2	Moderate	2.82562	In	19	0.343167	0.677419
1116	Methiotepa	1	2	3	2	Moderate	2.82562	In	19	0.343167	0.677419
862	Fosthiazate	1	3	3	3	Good	2.5935	In	31	0.333055	0.738025
976	IPSP	1	3	3	3	Good	2.5852	In	31	0.413236	0.71255
316	Chlorethoxyfos	1	3	3	3	Good	2.43767	In	19	0.289471	0.774194
1490	Tebupirimfos	1	3	3	3	Good	2.42745	In	31	0.125294	0.92874
240	Buminafos	1	3	3	3	Good	2.34477	In	31	0.4974	0.699463
1475	Sulfotep	1	3	3	3	Good	2.32656	In	31	0.440847	0.676922
1513	Tetradifon	1	3	3	3	Good	2.32656	In	31	0.440847	0.676922
1514	Tetraethyl pyrophosphate	1	3	3	3	Good	2.32656	In	31	0.440847	0.676922
892	Glyphosine	1	3	3	3	Good	2.28059	In	31	0.243224	0.784268
663	Ethoprophos	1	3	3	3	Good	2.17904	In	19	0.289471	0.78125
337	Chlormephos	1	3	3	3	Good	2.16083	In	19	0.171584	0.821429
120	Ampropylfos	1	3	3	3	Good	2.14263	In	25	0.147743	0.75
859	Fosetyl	1	3	3	3	Good	2.14263	In	25	0.147743	0.75
688	Fenamiphos	1	3	3	3	Good	2.08085	In	31	1.25e-06	0.999999
973	Iprobenfos	1	3	3	3	Good	2.08085	In	31	1.25e-06	0.999999
656	Ethion	1	3	3	3	Good	2.06793	In	19	0.489956	0.641026
479	Demeton	1	3	3	3	Good	2.04972	In	19	0.300977	0.757576
606	Disulfoton	1	3	3	3	Good	2.04972	In	19	0.300977	0.757576
607	Disulfoton sulfoxide	1	3	3	3	Good	2.04972	In	19	0.300977	0.757576
9	1,1,1,2-tetrachloroethane	1	3	3	3	Good	1.9951	In	25	0	1
11	1,1,1-trichloroethane	1	3	3	3	Good	1.9951	In	25	0	1
13	1,1-dichloroethane	1	3	3	3	Good	1.9951	In	25	0	1
14	1,2,3-trichloropropane	1	3	3	3	Good	1.9951	In	25	0	1
16	1,2-dibromoethane	1	3	3	3	Good	1.9951	In	25	0	1
17	1,2-dichloropropane	1	3	3	3	Good	1.9951	In	25	0	1
22	1,4-dioxane	1	3	3	3	Good	1.9951	In	25	0	1
207	Bis-trichloromethyl sulfone	1	3	3	3	Good	1.9951	In	25	0	1
226	Bromomethane	1	3	3	3	Good	1.9951	In	25	0	1
272	Camphechlor	1	3	3	3	Good	1.9951	In	25	0	1
284	Carbon tetrachloride	1	3	3	3	Good	1.9951	In	25	0	1
297	Chloral hydrate	1	3	3	3	Good	1.9951	In	25	0	1
343	Chloropicrin	1	3	3	3	Good	1.9951	In	25	0	1
495	Dibromochloropropane	1	3	3	3	Good	1.9951	In	25	0	1
631	Epichlorohydrin	1	3	3	3	Good	1.9951	In	25	0	1
650	Ethanethiol	1	3	3	3	Good	1.9951	In	25	0	1
651	Ethanol	1	3	3	3	Good	1.9951	In	25	0	1
673	Ethylene dichloride	1	3	3	3	Good	1.9951	In	25	0	1
880	Gliftor	1	3	3	3	Good	1.9951	In	25	0	1
962	Iodomethane	1	3	3	3	Good	1.9951	In	25	0	1
1033	Lindane	1	3	3	3	Good	1.9951	In	25	0	1
1086	Mepiquat	1	3	3	3	Good	1.9951	In	25	0	1
1096	Metaldehyde	1	3	3	3	Good	1.9951	In	25	0	1
1154	Mirex	1	3	3	3	Good	1.9951	In	25	0	1
1549	Tiaojiean	1	3	3	3	Good	1.9951	In	25	0	1
1617	Trioxymethylene	1	3	3	3	Good	1.9951	In	25	0	1
248	Butathiofos	1	3	3	3	Good	1.96353	In	31	0.193474	0.846153
245	Butamifos	1	3	3	3	Good	1.95153	In	31	0.0542936	0.967821
1344	Prothoate	1	3	3	3	Good	1.92871	In	19	0.30014	0.729167
111	Amiton	1	3	3	3	Good	1.92041	In	19	0.319235	0.735294
1233	Oxydeprofos	1	3	3	3	Good	1.9022	In	19	0.142766	0.892857
946	Imicyafos	1	3	3	3	Good	1.89873	In	1	0.259541	0.720659
353	Chlorphonium	1	3	3	3	Good	1.89195	In	31	0.247496	0.829407
1285	Piperophos	1	3	3	3	Good	1.8888	In	19	0.305266	0.725108
1177	Naled	1	3	3	3	Good	1.88399	In	19	0.142766	0.88
1085	Mephosfolan	1	3	3	3	Good	1.87922	In	5	0.15771	0.830133
45	2-aminobutane	1	3	3	3	Good	1.86579	In	25	0.0409766	0.9375
88	Alpha-chlorohydrin	1	3	3	3	Good	1.86579	In	25	0.0409766	0.9375
338	Chlormequat	1	3	3	3	Good	1.86579	In	25	0.0409766	0.9375
569	Dimethyl disulfide	1	3	3	3	Good	1.86579	In	25	0.0409766	0.9375
616	Dodemorph	1	3	3	3	Good	1.86579	In	25	0.0409766	0.9375
652	Ethephon	1	3	3	3	Good	1.86579	In	25	0.0409766	0.9375
674	Ethylene glycol	1	3	3	3	Good	1.86579	In	25	0.0409766	0.9375
1199	N-nitrosodimethylamine	1	3	3	3	Good	1.86579	In	25	0.0409766	0.9375
1334	Propylene glycol	1	3	3	3	Good	1.86579	In	25	0.0409766	0.9375
1536	Thiocyclam oxalate	1	3	3	3	Good	1.86579	In	25	0.0409766	0.9375
1266	Phosfolan	1	3	3	3	Good	1.83898	In	5	0.157147	0.839079
986	Isofenphos	1	3	3	3	Good	1.81066	In	31	0.108667	0.935252
126	Aspon	1	3	3	3	Good	1.8093	In	19	0.542595	0.609756
863	Fosthietan	1	3	3	3	Good	1.78534	In	5	0.158145	0.824714
1261	Phorate	1	3	3	3	Good	1.77288	In	19	0.150489	0.862069
1505	Terbufos	1	3	3	3	Good	1.77288	In	19	0.150489	0.862069
74	AD-67	1	3	3	3	Good	1.76981	In	12	0.0428154	0.925922
313	Chlordecone	1	3	3	3	Good	1.76981	In	12	0.0428154	0.925922
61	Acethion	1	3	3	3	Good	1.7681	In	19	0.313925	0.700758
63	Acetophos	1	3	3	3	Good	1.7681	In	19	0.313925	0.700758
164	Bensulide	1	3	3	3	Good	1.76717	In	31	0.165079	0.895908
47	2-hydrazinoethanol	1	3	3	3	Good	1.73647	In	25	0.0819533	0.882353
48	2-methoxyethanol	1	3	3	3	Good	1.73647	In	25	0.0819533	0.882353
203	Bis(2-chloroethyl)ether	1	3	3	3	Good	1.73647	In	25	0.0819533	0.882353
246	Butan-1-ol	1	3	3	3	Good	1.73647	In	25	0.0819533	0.882353
247	Butanethiol	1	3	3	3	Good	1.73647	In	25	0.0819533	0.882353
298	Chloralose	1	3	3	3	Good	1.73647	In	25	0.0819533	0.882353
370	Choline chloride	1	3	3	3	Good	1.73647	In	25	0.0819533	0.882353
468	DCIP	1	3	3	3	Good	1.73647	In	25	0.0819533	0.882353
556	Dimefox	1	3	3	3	Good	1.73647	In	25	0.0819533	0.882353
884	Glycerin	1	3	3	3	Good	1.73647	In	25	0.0819533	0.882353
921	Hexylene glycol	1	3	3	3	Good	1.73647	In	25	0.0819533	0.882353
1109	Methamidophos	1	3	3	3	Good	1.73647	In	25	0.0819533	0.882353
421	Cyanthoate	1	3	3	3	Good	1.72845	In	1	0.27993	0.702586
993	Isonoruron	1	3	3	3	Good	1.69248	In	25	0.0625664	0.865385
1203	Noruron	1	3	3	3	Good	1.69248	In	25	0.0625664	0.865385
1089	Merphos	1	3	3	3	Good	1.66177	In	19	0.37168	0.694444
1587	Tribufos	1	3	3	3	Good	1.66177	In	19	0.37168	0.694444
437	Cycluron	1	3	3	3	Good	1.66097	In	12	0.0648085	0.854034
411	Coumithoate	1	3	3	3	Good	1.65109	In	31	0.18037	0.833158
477	Demephion	1	3	3	3	Good	1.62536	In	19	0.0475887	0.96
478	Demephion-O	1	3	3	3	Good	1.62536	In	19	0.0475887	0.96
429	Cyclohexanone	1	3	3	3	Good	1.61961	In	12	2.14e-06	0.999996
533	Dicyclonon	1	3	3	3	Good	1.61961	In	12	2.14e-06	0.999996
536	Dieldrin	1	3	3	3	Good	1.61961	In	12	2.14e-06	0.999996
628	Endrin	1	3	3	3	Good	1.61961	In	12	2.14e-06	0.999996
109	Amiprofos-methyl	1	3	3	3	Good	1.61495	In	31	0.184793	0.825158
236	Bronopol	1	3	3	3	Good	1.60715	In	25	0.12293	0.833333
677	Ethylicin	1	3	3	3	Good	1.60715	In	25	0.12293	0.833333
1046	Mazidox	1	3	3	3	Good	1.60715	In	25	0.12293	0.833333
1590	Trichlorfon	1	3	3	3	Good	1.60715	In	25	0.12293	0.833333
1063	Mecarbam	1	3	3	3	Good	1.59913	In	1	0.316857	0.679167
494	Diazinon	1	3	3	3	Good	1.55737	In	1	0.205321	0.783654
312	Chlordane	1	3	3	3	Good	1.54452	In	9	0	1
467	Dazomet	1	3	3	3	Good	1.54452	In	9	0	1
1197	N-methyl-2-pyrrolidone	1	3	3	3	Good	1.54452	In	9	0	1
1465	Strobane	1	3	3	3	Good	1.54452	In	9	0	1
995	Isopolinate	1	3	3	3	Good	1.51118	In	12	0.0957343	0.806448
889	Glyphosate-isopropylamine	1	3	3	3	Good	1.5085	In	5	0.10096	0.892159
1325	Propetamphos	1	3	3	3	Good	1.50316	In	1	0.246277	0.740909
480	Demeton-O-methyl	1	3	3	3	Good	1.49604	In	19	0	1
481	Demeton-O-methyl sulfone	1	3	3	3	Good	1.49604	In	19	0	1
482	Demeton-S-methyl	1	3	3	3	Good	1.49604	In	19	0	1
483	Demeton-S-methyl sulfone	1	3	3	3	Good	1.49604	In	19	0	1
1003	Isothioate	1	3	3	3	Good	1.49604	In	19	0	1
1232	Oxydemeton-methyl	1	3	3	3	Good	1.49604	In	19	0	1
1539	Thiometon	1	3	3	3	Good	1.49604	In	19	0	1
90	Alpha-endosulfan	1	3	3	3	Good	1.49445	In	9	0.0143836	0.972222
191	Beta-endosulfan	1	3	3	3	Good	1.49445	In	9	0.0143836	0.972222
309	Chlorbicyclen	1	3	3	3	Good	1.49445	In	9	0.0143836	0.972222
625	Endosulfan	1	3	3	3	Good	1.49445	In	9	0.0143836	0.972222
979	Isobenzan	1	3	3	3	Good	1.49445	In	9	0.0143836	0.972222
228	Bromophos-ethyl	1	3	3	3	Good	1.49206	In	31	0.20541	0.797955
503	Dichlofenthion	1	3	3	3	Good	1.49206	In	31	0.20541	0.797955
540	Dietholate	1	3	3	3	Good	1.49206	In	31	0.20541	0.797955
1157	Molinate	1	3	3	3	Good	1.48614	In	12	0.0927628	0.815214
367	Chlorthiophos	1	3	3	3	Good	1.48563	In	31	0.176637	0.858406
644	Etaphos	1	3	3	3	Good	1.48563	In	31	0.176637	0.858406
913	Heterophos	1	3	3	3	Good	1.48563	In	31	0.176637	0.858406
1304	Profenofos	1	3	3	3	Good	1.48563	In	31	0.176637	0.858406
1343	Prothiofos	1	3	3	3	Good	1.48563	In	31	0.176637	0.858406
1601	Trifenofos	1	3	3	3	Good	1.48563	In	31	0.176637	0.858406
1209	Octachlorodipropyl ether	1	3	3	3	Good	1.47784	In	25	0.163907	0.789474
1167	Morphothion	1	3	3	3	Good	1.47306	In	5	0.0514465	0.942694
609	Ditalimfos	1	3	3	3	Good	1.47118	In	30	0.211904	0.779718
977	Isamidofos	1	3	3	3	Good	1.45872	In	31	0.174525	0.852723
987	Isofenphos-methyl	1	3	3	3	Good	1.45872	In	31	0.174525	0.852723
57	Acephate	1	3	3	3	Good	1.45007	In	18	0.15061	0.751471
619	Dufulin	1	3	3	3	Good	1.44986	In	31	0.189297	0.860345
630	EPBP	1	3	3	3	Good	1.44821	In	30	0.176673	0.774688
881	Glufosinate	1	3	3	3	Good	1.4334	In	5	0.10813	0.869283
882	Glufosinate-ammonium	1	3	3	3	Good	1.4334	In	5	0.10813	0.869283
888	Glyphosate-dimethylammonium	1	3	3	3	Good	1.4334	In	5	0.10813	0.869283
224	Bromocyclen	1	3	3	3	Good	1.43187	In	9	0.032363	0.9375
1321	Propaphos	1	3	3	3	Good	1.41606	In	31	0.195758	0.844124
112	Amiton oxalate	1	3	3	3	Good	1.4156	In	19	0.363205	0.642857
978	Isazofos	1	3	3	3	Good	1.40155	In	5	0.167913	0.799265
1409	Quinothion	1	3	3	3	Good	1.39551	In	31	0.226458	0.776581
1411	Quintiofos	1	3	3	3	Good	1.39141	In	30	0.171735	0.788148
1237	Parathion-ethyl	1	3	3	3	Good	1.36275	In	31	0.198105	0.831203
1128	Methyl isobutyl ketone	1	3	3	3	Good	1.36098	In	12	0.0856265	0.862066
1289	Pirimiphos-ethyl	1	3	3	3	Good	1.35651	In	1	0.286207	0.717818
46	2-butoxyethanol	1	3	3	3	Good	1.34852	In	19	0.171584	0.8
662	Ethohexadiol	1	3	3	3	Good	1.34852	In	19	0.171584	0.8
669	Ethyl butyl nitrosamine	1	3	3	3	Good	1.34852	In	19	0.171584	0.8
1456	Sorbitol	1	3	3	3	Good	1.34852	In	19	0.171584	0.8
275	Carbamorph	1	3	3	3	Good	1.32554	In	18	0.122553	0.800838
621	Edifenphos	1	3	3	3	Good	1.31889	In	30	0.199356	0.741214
632	EPN	1	3	3	3	Good	1.31889	In	30	0.199356	0.741214
1265	Phosdiphen	1	3	3	3	Good	1.31889	In	30	0.199356	0.741214
532	Dicrotophos	1	3	3	3	Good	1.31598	In	1	0	1
1540	Thionazin	1	3	3	3	Good	1.3112	In	1	0.206277	0.758974
566	Dimethoate	1	3	3	3	Good	1.30409	In	5	0.0654496	0.915034
1213	Omethoate	1	3	3	3	Good	1.30409	In	5	0.0654496	0.915034
1264	Phosametine	1	3	3	3	Good	1.30409	In	5	0.0654496	0.915034
56	ACC	1	3	3	3	Good	1.30255	In	9	0.0539383	0.865385
911	Heptenophos	1	3	3	3	Good	1.28884	In	1	0.08102	0.899796
1262	Phosacetim	1	3	3	3	Good	1.28728	In	30	0.168675	0.807015
404	Copper naphthenate	1	3	3	3	Good	1.27302	In	18	0.137212	0.834319
428	Cycloate	1	3	3	3	Good	1.27302	In	18	0.137212	0.834319
43	24-epibrassinolide	1	3	3	3	Good	1.26806	In	19	0.173467	0.778571
858	Fosamine	1	3	3	3	Good	1.26233	In	18	0.152236	0.733868
463	DAEP	1	3	3	3	Good	1.24987	In	5	0.0177458	0.983662
660	Ethoate-methyl	1	3	3	3	Good	1.24987	In	5	0.0177458	0.983662
81	Aldrin	1	3	3	3	Good	1.24412	In	8	0.0643879	0.857145
564	Dimethipin	1	3	3	3	Good	1.24412	In	8	0.0643879	0.857145
675	Ethylene urea	1	3	3	3	Good	1.24412	In	8	0.0643879	0.857145
743	Ferbam	1	3	3	3	Good	1.24412	In	8	0.0643879	0.857145
914	Hexachloroacetone	1	3	3	3	Good	1.24412	In	8	0.0643879	0.857145
985	Isodrin	1	3	3	3	Good	1.24412	In	8	0.0643879	0.857145
994	Isophorone	1	3	3	3	Good	1.24412	In	8	0.0643879	0.857145
1185	Nickel bis(dimethyldithiocarbamate)	1	3	3	3	Good	1.24412	In	8	0.0643879	0.857145
1269	Phosphamidon	1	3	3	3	Good	1.22632	In	1	0.128753	0.867021
1423	Schradan	1	3	3	3	Good	1.2192	In	19	0.150489	0.84
1464	Spiroxamine	1	3	3	3	Good	1.2192	In	19	0.150489	0.84
1614	Triisopropanolamine	1	3	3	3	Good	1.2192	In	19	0.150489	0.84
912	Heptopargil	1	3	3	3	Good	1.21656	In	9	0.0885695	0.824176
851	Fonofos	1	3	3	3	Good	1.21522	In	1	0.253365	0.727273
1591	Trichloronate	1	3	3	3	Good	1.21522	In	1	0.253365	0.727273
254	Butonate	1	3	3	3	Good	1.21443	In	5	0.0514465	0.945172
221	Bromfenvinfos	1	3	3	3	Good	1.21255	In	31	0.233319	0.797955
326	Chlorfenvinphos	1	3	3	3	Good	1.21255	In	31	0.233319	0.797955
128	Athidathion	1	3	3	3	Good	1.20965	In	5	0.196168	0.753991
355	Chlorprazophos	1	3	3	3	Good	1.20879	In	1	0.228173	0.731002
1160	Monocrotophos	1	3	3	3	Good	1.19529	In	1	0.0450875	0.960561
1340	Prothidathion	1	3	3	3	Good	1.19298	In	5	0.215094	0.753847
1119	Methocrotophos	1	3	3	3	Good	1.18666	In	1	0.0561089	0.953216
358	Chlorpyrifos	1	3	3	3	Good	1.18604	In	1	0.233612	0.724786
400	Copper abietate	1	3	3	3	Good	1.17323	In	9	0.0921699	0.803571
626	Endothal	1	3	3	3	Good	1.17323	In	9	0.0921699	0.803571
920	Hexazinone	1	3	3	3	Good	1.17323	In	9	0.0921699	0.803571
981	Isocarbamid	1	3	3	3	Good	1.17323	In	9	0.0921699	0.803571
1029	Lenacil	1	3	3	3	Good	1.17257	In	9	0.0819802	0.798817
930	Icaridin	1	3	3	3	Good	1.16078	In	18	0.150084	0.784765
430	Cycloheximide	1	3	3	3	Good	1.15657	In	18	0.076484	0.857147
655	Ethiolate	1	3	3	3	Good	1.15599	In	18	0.100621	0.872885
1176	Naftalofos	1	3	3	3	Good	1.15412	In	30	0.174747	0.78868
1198	N-methylneodecanamide	1	3	3	3	Good	1.14371	In	18	0.145025	0.78955
1353	Pyraclofos	1	3	3	3	Good	1.13687	In	31	0.226458	0.78377
887	Glyphosate	1	3	3	3	Good	1.13301	In	18	0.144813	0.79032
890	Glyphosate-monoammonium	1	3	3	3	Good	1.13301	In	18	0.144813	0.79032
891	Glyphosate-trimesium	1	3	3	3	Good	1.13301	In	18	0.144813	0.79032
980	Isobornyl thiocyanoacetate	1	3	3	3	Good	1.13123	In	18	0.0928811	0.881505
1131	Methylacetophos	1	3	3	3	Good	1.12055	In	5	0.0527676	0.940627
49	2-methoxyethylmercury chloride	1	3	3	3	Good	1.11481	In	8	0.0785958	0.779223
344	Chloropon	1	3	3	3	Good	1.11481	In	8	0.0785958	0.779223
465	Dalapon	1	3	3	3	Good	1.11481	In	8	0.0785958	0.779223
823	Flupropanate	1	3	3	3	Good	1.11481	In	8	0.0785958	0.779223
1329	Propionic acid	1	3	3	3	Good	1.11481	In	8	0.0785958	0.779223
1065	Mecarphon	1	3	3	3	Good	1.11098	In	5	0.11751	0.856211
534	Dicyclopentadiene	1	3	3	3	Good	1.09393	In	8	0.0193157	0.952383
909	Heptachlor	1	3	3	3	Good	1.09393	In	8	0.0193157	0.952383
1035	Lithium perfluorooctane sulfonate	1	3	3	3	Good	1.08989	In	19	0.142766	0.88
1544	Thiosultap	1	3	3	3	Good	1.08989	In	19	0.142766	0.88
1627	Vamidothion	1	3	3	3	Good	1.08511	In	5	0.100276	0.905994
1151	Mevinphos	1	3	3	3	Good	1.06597	In	1	0.0719798	0.915622
96	Amibuzin	1	3	3	3	Good	1.06059	In	18	0.094454	0.849511
97	Amicarbazone	1	3	3	3	Good	1.06059	In	18	0.094454	0.849511
250	Buthidazole	1	3	3	3	Good	1.06059	In	18	0.094454	0.849511
98	Amidithion	1	3	3	3	Good	1.04488	In	5	0.0993883	0.916166
1554	Tirpate	1	3	3	3	Good	1.04392	In	18	0.0532704	0.899302
958	Inezin	1	3	3	3	Good	1.04147	In	30	0.145133	0.816848
1613	Triforine	1	3	3	3	Good	1.02725	In	18	0.0603717	0.919647
589	Dinotefuran	1	3	3	3	Good	1.02667	In	18	0.111039	0.824004
1030	Leptophos	1	3	3	3	Good	1.02282	In	30	2.46e-06	0.999997
489	Dialifos	1	3	3	3	Good	1.02096	In	1	0.261262	0.68684
261	Butylate	1	3	3	3	Good	1.01439	In	5	0.15403	0.833045
856	Formothion	1	3	3	3	Good	1.0037	In	5	0.150427	0.823531
487	Di-1-p-menthene	1	3	3	3	Good	1.00353	In	18	0.0529572	0.928813
593	Dioxabenzophos	1	3	3	3	Good	0.988391	In	24	0.23114	0.542502
670	Ethyl formate	1	3	3	3	Good	0.985489	In	18	0.099727	0.81553
1492	Tebuthiuron	1	3	3	3	Good	0.985489	In	18	0.099727	0.81553
637	EPTC	1	3	3	3	Good	0.968877	In	5	0.150949	0.844348
1190	Nithiazine	1	3	3	3	Good	0.964609	In	8	0.0490367	0.857145
23	1-decanol	1	3	3	3	Good	0.960571	In	19	0.150489	0.846154
615	Dodecylphenol ethoxylate	1	3	3	3	Good	0.960571	In	19	0.150489	0.846154
1341	Prothiocarb	1	3	3	3	Good	0.937586	In	18	0.147086	0.769378
1402	Quinalphos	1	3	3	3	Good	0.935709	In	30	0.281108	0.615383
991	Isomalathion	1	3	3	3	Good	0.934344	In	19	0.277487	0.6875
1038	Malathion	1	3	3	3	Good	0.934344	In	19	0.277487	0.6875
1367	Pyrazophos	1	3	3	3	Good	0.92325	In	1	0.299622	0.675799
28	1-octyl-2-pyrrolidone	1	3	3	3	Good	0.902142	In	19	0.154663	0.83
1146	Metribuzin	1	3	3	3	Good	0.891616	In	8	0.097148	0.753534
1577	Triapenthenol	1	3	3	3	Good	0.877052	In	18	0.0134136	0.980957
10	1,1,1-acetonitrile	1	3	3	3	Good	0.868632	In	8	0.0482926	0.874998
24	1-methylcyclopropene	1	3	3	3	Good	0.868632	In	8	0.0482926	0.874998
59	Acetamide	1	3	3	3	Good	0.868632	In	8	0.0482926	0.874998
115	Ammonium acetate	1	3	3	3	Good	0.868632	In	8	0.0482926	0.874998
265	Calcium acetate	1	3	3	3	Good	0.868632	In	8	0.0482926	0.874998
402	Copper II acetate	1	3	3	3	Good	0.868632	In	8	0.0482926	0.874998
645	Etem	1	3	3	3	Good	0.868632	In	8	0.0482926	0.874998
678	Ethylmercury bromide	1	3	3	3	Good	0.868632	In	8	0.0482926	0.874998
807	Fluoroacetamide	1	3	3	3	Good	0.868632	In	8	0.0482926	0.874998
1097	Metam	1	3	3	3	Good	0.868632	In	8	0.0482926	0.874998
1129	Methyl isothiocyanate	1	3	3	3	Good	0.868632	In	8	0.0482926	0.874998
1449	Sodium monochloroacetate	1	3	3	3	Good	0.868632	In	8	0.0482926	0.874998
1450	Sodium monofluoroacetate	1	3	3	3	Good	0.868632	In	8	0.0482926	0.874998
1484	TCA-ammonium	1	3	3	3	Good	0.868632	In	8	0.0482926	0.874998
1631	Vinegar	1	3	3	3	Good	0.868632	In	8	0.0482926	0.874998
1240	Pebulate	1	3	3	3	Good	0.864593	In	19	0.159617	0.82
1629	Vernolate	1	3	3	3	Good	0.864593	In	19	0.159617	0.82
274	Captan	1	3	3	3	Good	0.864479	In	8	0.0463324	0.870645
1502	Terbacil	1	3	3	3	Good	0.864479	In	8	0.0463324	0.870645
657	Ethiozin	1	3	3	3	Good	0.856172	In	18	0.0577087	0.883491
1546	Thiram	1	3	3	3	Good	0.856172	In	18	0.0577087	0.883491
237	Brucine	1	3	3	3	Good	0.854884	In	8	0.0935991	0.770091
1538	Thiofanox	1	3	3	3	Good	0.847866	In	18	0.0648448	0.882861
876	Furilazole	1	3	3	3	Good	0.841722	In	8	0.0483726	0.854815
1319	Propamocarb	1	3	3	3	Good	0.83956	In	5	0.158919	0.808161
273	Captafol	1	3	3	3	Good	0.835293	In	8	0.0921906	0.779223
682	Etridiazole	1	3	3	3	Good	0.835293	In	8	0.0921906	0.779223
821	Flupropadine	1	3	3	3	Good	0.835293	In	8	0.0921906	0.779223
822	Flupropadine hydrochloride	1	3	3	3	Good	0.835293	In	8	0.0921906	0.779223
1005	Isouron	1	3	3	3	Good	0.835293	In	8	0.0921906	0.779223
78	Aldicarb	1	3	3	3	Good	0.834139	In	18	3.02e-06	0.999996
80	Aldoxycarb	1	3	3	3	Good	0.834139	In	18	3.02e-06	0.999996
253	Butocarboxim	1	3	3	3	Good	0.834139	In	18	3.02e-06	0.999996
256	Butoxycarboxim	1	3	3	3	Good	0.834139	In	18	3.02e-06	0.999996
29	2-(octylthio)ethanol	1	3	3	3	Good	0.831254	In	19	0.171584	0.814815
1471	Sulfluramid	1	3	3	3	Good	0.831254	In	19	0.171584	0.814815
1509	Tetcyclacis	1	3	3	3	Good	0.825967	In	8	0.0502824	0.843856
1021	Kelevan	1	3	3	3	Good	0.824835	In	5	0.158266	0.811571
354	Chlorphoxim	1	3	3	3	Good	0.806393	In	30	0.305348	0.589742
1271	Phoxim	1	3	3	3	Good	0.806393	In	30	0.305348	0.589742
877	Furmecyclox	1	3	3	3	Good	0.802531	In	18	0.0688236	0.85922
94	Ametridione	1	3	3	3	Good	0.801954	In	18	0.0100655	0.985433
1457	Spidoxamat	1	3	3	3	Good	0.798603	In	8	0.0544225	0.824821
1556	Tolclofos-methyl	1	3	3	3	Good	0.788186	In	24	0.166687	0.752377
1557	Tolfenpyrad	1	3	3	3	Good	0.788186	In	24	0.166687	0.752377
1173	N,N-dimethyl capramide	1	3	3	3	Good	0.772825	In	19	0.161819	0.798077
519	Dichlorvos	1	3	3	3	Good	0.757521	In	34	0.163457	0.693965
1130	Methyl nonyl ketone	1	3	3	3	Good	0.755757	In	19	0.163884	0.793706
1013	Isoxathion	1	3	3	3	Good	0.748625	In	30	0.29197	0.599347
983	Isocil	1	3	3	3	Good	0.739315	In	8	0.0660581	0.78358
1022	Ketospiradox	1	3	3	3	Good	0.739315	In	8	0.0660581	0.78358
1254	Peroxyacetic acid	1	3	3	3	Good	0.739315	In	8	0.0660581	0.78358
1294	Polybutene	1	3	3	3	Good	0.739315	In	8	0.0660581	0.78358
1434	Silatrane	1	3	3	3	Good	0.739315	In	8	0.0660581	0.78358
1525	Thiazafluron	1	3	3	3	Good	0.739315	In	8	0.0660581	0.78358
217	Bromacil	1	3	3	3	Good	0.735162	In	8	0.090781	0.788287
218	Bromacil-dimethylammonium	1	3	3	3	Good	0.735162	In	8	0.090781	0.788287
424	Cybutryne	1	3	3	3	Good	0.734081	In	18	0.0478402	0.924902
373	Cinmethylin	1	3	3	3	Good	0.726856	In	18	0.0335445	0.951452
454	Cyprazine	1	3	3	3	Good	0.726856	In	18	0.0335445	0.951452
466	Daminozide	1	3	3	3	Good	0.726856	In	18	0.0335445	0.951452
992	Isomethiozin	1	3	3	3	Good	0.726856	In	18	0.0335445	0.951452
1324	Propazine	1	3	3	3	Good	0.726856	In	18	0.0335445	0.951452
1398	Pyroxasulfone	1	3	3	3	Good	0.726856	In	18	0.0335445	0.951452
1507	Terbuthylazine	1	3	3	3	Good	0.726856	In	18	0.0335445	0.951452
369	Cholecalciferol	1	3	3	3	Good	0.71855	In	18	0.104019	0.832888
990	Isolan	1	3	3	3	Good	0.705976	In	18	0.0931972	0.81553
1120	Methomyl	1	3	3	3	Good	0.705976	In	18	0.0931972	0.81553
1311	Prohexadione	1	3	3	3	Good	0.705976	In	18	0.0931972	0.81553
264	Calciferol	1	3	3	3	Good	0.704822	In	18	0.0469581	0.93636
1378	Pyridafenthion	1	3	3	3	Good	0.69911	In	30	0.281187	0.607832
929	Hyquincarb	1	3	3	3	Good	0.69665	In	8	0.0928592	0.764032
436	Cycloxydim	1	3	3	3	Good	0.689099	In	18	0.100406	0.842236
1290	Pirimiphos-methyl	1	3	3	3	Good	0.676791	In	5	0.171909	0.811365
923	Hexythiazox	1	3	3	3	Good	0.676261	In	8	0.0945146	0.751191
490	Di-allate	1	3	3	3	Good	0.672637	In	18	0.0480247	0.922723
725	Fenpropimorph	1	3	3	3	Good	0.672637	In	18	0.0480247	0.922723
968	Ipazine	1	3	3	3	Good	0.672637	In	18	0.0480247	0.922723
1315	Prometon	1	3	3	3	Good	0.672637	In	18	0.0480247	0.922723
1316	Prometryn	1	3	3	3	Good	0.672637	In	18	0.0480247	0.922723
1506	Terbumeton	1	3	3	3	Good	0.672637	In	18	0.0480247	0.922723
1508	Terbutryn	1	3	3	3	Good	0.672637	In	18	0.0480247	0.922723
1575	Tri-allate	1	3	3	3	Good	0.672637	In	18	0.0480247	0.922723
1108	Methacrifos	1	3	3	3	Good	0.659812	In	34	0.154812	0.772357
704	Fenitrothion	1	3	3	3	Good	0.65887	In	24	0.175232	0.705353
565	Dimethirimol	1	3	3	3	Good	0.658585	In	18	0.0548891	0.920561
376	Cisanilide	1	3	3	3	Good	0.652663	In	28	0.0850945	0.72336
653	Ethidimuron	1	3	3	3	Good	0.641606	In	34	0.0979115	0.85263
724	Fenpropidin	1	3	3	3	Good	0.637064	In	18	0.0515166	0.907652
130	Atrazine	1	3	3	3	Good	0.632983	In	34	0.0628027	0.874536
486	Desmetryn	1	3	3	3	Good	0.632983	In	34	0.0628027	0.874536
1081	Menazon	1	3	3	3	Good	0.628204	In	34	0.155953	0.754309
571	Dimethyl(4-piperidinocarbonyloxy-2,5-xylyl)sulfonium toluene-4-sulfonate	1	3	3	3	Good	0.621491	In	34	0.0981309	0.842762
1202	Nornicotine	1	3	3	3	Good	0.614151	In	28	0.0752616	0.744762
1616	Trinexapac-ethyl	1	3	3	3	Good	0.61132	In	34	0.0586387	0.883399
462	Cyromazine	1	3	3	3	Good	0.609998	In	20	0.077716	0.785719
702	Fenhexamid	1	3	3	3	Good	0.609998	In	20	0.077716	0.785719
1348	Pydanon	1	3	3	3	Good	0.609998	In	20	0.077716	0.785719
1432	Siduron	1	3	3	3	Good	0.609998	In	20	0.077716	0.785719
287	Carboxazole	1	3	3	3	Good	0.605845	In	34	0.098603	0.835086
307	Chlorazine	1	3	3	3	Good	0.604764	In	18	0.0943603	0.870203
561	Dimethametryn	1	3	3	3	Good	0.604764	In	18	0.0943603	0.870203
600	Dipropetryn	1	3	3	3	Good	0.604764	In	18	0.0943603	0.870203
227	Bromophos	1	3	3	3	Good	0.600441	In	24	0.164718	0.752503
491	Diamidaphos	1	3	3	3	Good	0.600441	In	24	0.164718	0.752503
697	Fenchlorphos	1	3	3	3	Good	0.600441	In	24	0.164718	0.752503
961	Iodofenphos	1	3	3	3	Good	0.600441	In	24	0.164718	0.752503
1015	Jiajizengxiaolin	1	3	3	3	Good	0.600441	In	24	0.164718	0.752503
982	Isocarbophos	1	3	3	3	Good	0.597824	In	24	0.20487	0.646574
95	Ametryn	1	3	3	3	Good	0.597539	In	18	0.0577087	0.890905
129	Atraton	1	3	3	3	Good	0.597539	In	18	0.0577087	0.890905
138	Azithiram	1	3	3	3	Good	0.597539	In	18	0.0577087	0.890905
252	Buthiuron	1	3	3	3	Good	0.597539	In	18	0.0577087	0.890905
255	Butopyronoxyl	1	3	3	3	Good	0.597539	In	18	0.0577087	0.890905
1193	Nitrilacarb	1	3	3	3	Good	0.597539	In	18	0.0577087	0.890905
1425	Sebuthylazine	1	3	3	3	Good	0.597539	In	18	0.0577087	0.890905
1485	TCA-ethadyl	1	3	3	3	Good	0.597539	In	18	0.0577087	0.890905
1599	Trietazine	1	3	3	3	Good	0.597539	In	18	0.0577087	0.890905
683	Etrimfos	1	3	3	3	Good	0.594866	In	34	0.177755	0.714287
135	Azinphos-ethyl	1	3	3	3	Good	0.587982	In	1	0.208176	0.77095
1263	Phosalone	1	3	3	3	Good	0.587982	In	1	0.208176	0.77095
1288	Pirimicarb	1	3	3	3	Good	0.583088	In	20	0.0937873	0.82724
1286	Piproctanyl	1	3	3	3	Good	0.580927	In	19	0.189028	0.753086
414	Crimidine	1	3	3	3	Good	0.57839	In	28	0.0668602	0.7658
868	Furalane	1	3	3	3	Good	0.57839	In	28	0.0668602	0.7658
883	Glutaraldehyde	1	3	3	3	Good	0.576659	In	34	0.0532619	0.897961
1301	Procyazine	1	3	3	3	Good	0.576659	In	34	0.0532619	0.897961
79	Aldimorph	1	3	3	3	Good	0.572621	In	19	0.237944	0.758621
1014	Izopamfos	1	3	3	3	Good	0.572621	In	19	0.237944	0.758621
160	Benoxacor	1	3	3	3	Good	0.561412	In	28	0.095793	0.731702
1397	Pyroquilon	1	3	3	3	Good	0.561412	In	28	0.095793	0.731702
558	Dimepiperate	1	3	3	3	Good	0.55578	In	20	0.08496	0.840914
1501	Terallethrin	1	3	3	3	Good	0.553364	In	34	0.055537	0.922859
833	Flurochloridone	1	3	3	3	Good	0.551569	In	28	0.0612	0.782376
1567	Trans-flurochloridone	1	3	3	3	Good	0.551569	In	28	0.0612	0.782376
1503	Terbucarb	1	3	3	3	Good	0.550154	In	34	0.0504872	0.909424
285	Carbophenothion	1	3	3	3	Good	0.544004	In	1	0.221167	0.762275
1257	Phenkapton	1	3	3	3	Good	0.544004	In	1	0.221167	0.762275
1426	Secbumeton	1	3	3	3	Good	0.54332	In	18	0.094454	0.867518
562	Dimethenamid	1	3	3	3	Good	0.53911	In	34	0.04973	0.914287
563	Dimethenamid-P	1	3	3	3	Good	0.53911	In	34	0.04973	0.914287
420	Cyanophos	1	3	3	3	Good	0.537859	In	24	0.170127	0.723337
924	Huanjunzuo	1	3	3	3	Good	0.5349	In	20	0.060686	0.825005
1312	Prohydrojasmon	1	3	3	3	Good	0.530861	In	19	0.196213	0.740741
659	Ethirimol	1	3	3	3	Good	0.529268	In	34	0.0476831	0.933037
1581	Triazamate	1	3	3	3	Good	0.52599	In	18	0.095184	0.860615
1634	Xylachlor	1	3	3	3	Good	0.523346	In	20	0.0585216	0.8314
1515	Tetramethrin	1	3	3	3	Good	0.518488	In	34	0.0441696	0.937664
137	Aziprotryne	1	3	3	3	Good	0.512289	In	34	0.0489557	0.926314
1222	Oxamyl	1	3	3	3	Good	0.512289	In	34	0.0489557	0.926314
1437	Simazine	1	3	3	3	Good	0.512289	In	34	0.0489557	0.926314
270	Calvinphos	1	3	3	3	Good	0.511347	In	24	0.0664257	0.857137
1439	Simeton	1	3	3	3	Good	0.503666	In	34	0.0393384	0.944101
1440	Simetryn	1	3	3	3	Good	0.503666	In	34	0.0393384	0.944101
1469	Sulfallate	1	3	3	3	Good	0.503666	In	34	0.0393384	0.944101
19	1,3-dichloropropene	1	3	3	3	Good	0.493141	In	28	0.0982364	0.670727
427	Cyclethrin	1	3	3	3	Good	0.490256	In	34	0.0349673	0.950002
1458	Spinetoram	1	3	3	3	Good	0.487371	In	19	0.21304	0.734694
792	Fluindapyr	1	3	3	3	Good	0.484835	In	20	0.0525949	0.853453
959	Inpyrfluxam	1	3	3	3	Good	0.484835	In	20	0.0525949	0.853453
157	Benfuresate	1	3	3	3	Good	0.480682	In	20	0.060685	0.880957
242	Buprofezin	1	3	3	3	Good	0.480682	In	20	0.060685	0.880957
435	Cycloxaprid	1	3	3	3	Good	0.480682	In	20	0.060685	0.880957
576	Dinex	1	3	3	3	Good	0.480682	In	20	0.060685	0.880957
577	Dinex-diclexine	1	3	3	3	Good	0.480682	In	20	0.060685	0.880957
739	Fentrazamide	1	3	3	3	Good	0.480682	In	20	0.060685	0.880957
1001	Isopyrazam	1	3	3	3	Good	0.480682	In	20	0.060685	0.880957
1040	Malic acid	1	3	3	3	Good	0.480682	In	20	0.060685	0.880957
1523	Thiamethoxam	1	3	3	3	Good	0.480682	In	20	0.060685	0.880957
1302	Procymidone	1	3	3	3	Good	0.47936	In	28	0.0502113	0.83079
419	Cyanazine	1	3	3	3	Good	0.476528	In	34	0.0503245	0.90877
1210	Octhilinone	1	3	3	3	Good	0.475448	In	18	0.141171	0.821613
366	Chlorthion	1	3	3	3	Good	0.471124	In	24	0.173359	0.703274
1238	Parathion-methyl	1	3	3	3	Good	0.471124	In	24	0.173359	0.703274
1268	Phosnichlor	1	3	3	3	Good	0.471124	In	24	0.173359	0.703274
999	Isoprothiolane	1	3	3	3	Good	0.468222	In	34	0.0853679	0.848216
1113	Methidathion	1	3	3	3	Good	0.468222	In	34	0.0853679	0.848216
1260	Phenthoate	1	3	3	3	Good	0.458665	In	1	0.24306	0.737968
1358	Pyramat	1	3	3	3	Good	0.453771	In	34	0.0525406	0.897606
667	Ethoxyquin	1	3	3	3	Good	0.449074	In	28	0.0466498	0.884444
1211	Ofurace	1	3	3	3	Good	0.449074	In	28	0.0466498	0.884444
418	Cyanatryn	1	3	3	3	Good	0.447343	In	34	0.02098	0.969389
292	Cartap	1	3	3	3	Good	0.446189	In	18	0.140874	0.830642
1037	Lythidathion	1	3	3	3	Good	0.446189	In	18	0.140874	0.830642
1127	Methyl ether cellulose	1	3	3	3	Good	0.443304	In	19	0.277487	0.733333
1597	Tridemorph	1	3	3	3	Good	0.443304	In	19	0.277487	0.733333
661	Ethofumesate	1	3	3	3	Good	0.438017	In	34	0.0546149	0.889877
1623	Umifoxolaner	1	3	3	3	Good	0.432095	In	28	0.0478965	0.865847
223	Bromobutide	1	3	3	3	Good	0.426463	In	34	0.0563854	0.884209
291	Carpropamid	1	3	3	3	Good	0.426463	In	34	0.0563854	0.884209
1491	Tebutam	1	3	3	3	Good	0.426463	In	34	0.0563854	0.884209
1500	Tepraloxydim	1	3	3	3	Good	0.424047	In	34	0.0740339	0.8641
212	Bixlozone	1	3	3	3	Good	0.422253	In	28	0.0380969	0.903588
281	Carbofuran	1	3	3	3	Good	0.422253	In	28	0.0380969	0.903588
390	Clomazone	1	3	3	3	Good	0.422253	In	28	0.0380969	0.903588
1000	Isoproturon	1	3	3	3	Good	0.422253	In	28	0.0380969	0.903588
1105	Metconazole	1	3	3	3	Good	0.417628	In	34	0.0578682	0.879875
871	Furametpyr	1	3	3	3	Good	0.411209	In	28	0.0345751	0.911714
1583	Triazophos	1	3	3	3	Good	0.400236	In	24	0.232547	0.626981
1295	Prallethrin	1	3	3	3	Good	0.399912	In	34	0.00552028	0.99176
1300	Prochloraz	1	3	3	3	Good	0.399912	In	34	0.00552028	0.99176
617	Dodine	1	3	3	3	Good	0.399317	In	19	0.244197	0.718833
7	1-(4-chloro-1,3-dihydro-1,3-dioxo-2H-isoindole-2-yl)-cyclohexanecarboxamide	1	3	3	3	Good	0.384704	In	28	0.0261227	0.931825
1476	Sulfoxaflor	1	3	3	3	Good	0.384704	In	28	0.0261227	0.931825
1598	Tridiphane	1	3	3	3	Good	0.384704	In	28	0.0261227	0.931825
1576	Triamiphos	1	3	3	3	Good	0.38203	In	24	0.0386114	0.940471
633	Epocholeone	1	3	3	3	Good	0.379511	In	19	0.245684	0.714286
1074	Medinoterb	1	3	3	3	Good	0.378275	In	20	0.0275828	0.942135
627	Endothion	1	3	3	3	Good	0.373724	In	33	0.153124	0.781918
1461	Spiromesifen	1	3	3	3	Good	0.368979	In	34	0.00456214	0.993133
31	2,2-dibromo-3-nitrilopropionamide	1	3	3	3	Good	0.363824	In	28	0.0526134	0.804872
85	Allyl alcohol	1	3	3	3	Good	0.363824	In	28	0.0526134	0.804872
1293	Polyacrylamide	1	3	3	3	Good	0.363824	In	28	0.0526134	0.804872
1526	Thiazopyr	1	3	3	3	Good	0.362857	In	34	0.00655762	0.99013
1528	Thidiazimin	1	3	3	3	Good	0.359671	In	28	0.01814	0.951651
572	Dimethylvinphos	1	3	3	3	Good	0.358477	In	24	0.184511	0.654208
1511	Tetrachlorvinphos	1	3	3	3	Good	0.358477	In	24	0.184511	0.654208
105	Aminocyclopyrachlor-methyl	1	3	3	3	Good	0.355518	In	20	0.0202267	0.956902
1041	Malonoben	1	3	3	3	Good	0.355518	In	20	0.0202267	0.956902
969	Ipconazole	1	3	3	3	Good	0.347212	In	34	0.0116572	0.982455
1122	Methoprotryne	1	3	3	3	Good	0.346131	In	34	0.18619	0.717721
624	Empenthrin	1	3	3	3	Good	0.343059	In	34	0.0569716	0.894821
954	Indaziflam	1	3	3	3	Good	0.339872	In	20	0.0151694	0.967325
613	Dixanthogen	1	3	3	3	Good	0.338906	In	34	0.120323	0.798321
104	Aminocyclopyrachlor	1	3	3	3	Good	0.32838	In	28	0.00816156	0.977652
447	Cymoxanil	1	3	3	3	Good	0.319757	In	20	0.00866721	0.981066
458	Cyprofuram	1	3	3	3	Good	0.319757	In	20	0.00866721	0.981066
937	Imazapic	1	3	3	3	Good	0.319757	In	20	0.00866721	0.981066
938	Imazapic-ammonium	1	3	3	3	Good	0.319757	In	20	0.00866721	0.981066
293	Cetrimide	1	3	3	3	Good	0.313987	In	19	0.319235	0.709677
642	Etacelasil	1	3	3	3	Good	0.313987	In	19	0.319235	0.709677
1166	Morfamquat	1	3	3	3	Good	0.3087	In	34	0.0242099	0.963561
40	2,4-dimethylphenol	1	3	3	3	Good	0.305395	In	15	0.0889735	0.451137
351	Chloroxylenol	1	3	3	3	Good	0.305395	In	15	0.0889735	0.451137
928	Hymexazol	1	3	3	3	Good	0.305395	In	15	0.0889735	0.451137
1134	Methylisothiazoline	1	3	3	3	Good	0.305395	In	15	0.0889735	0.451137
1635	Xylene	1	3	3	3	Good	0.305395	In	15	0.0889735	0.451137
154	Bendiocarb	1	3	3	3	Good	0.302778	In	28	2.61e-06	0.999993
1317	Propachlor	1	3	3	3	Good	0.302778	In	28	2.61e-06	0.999993
1615	Trimethacarb	1	3	3	3	Good	0.302778	In	28	2.61e-06	0.999993
1430	Sethoxydim	1	3	3	3	Good	0.301149	In	5	0.221807	0.702841
475	Delachlor	1	3	3	3	Good	0.297146	In	34	0.0279758	0.957893
1139	Metolachlor	1	3	3	3	Good	0.297146	In	34	0.0279758	0.957893
1330	Propisochlor	1	3	3	3	Good	0.297146	In	34	0.0279758	0.957893
1443	S-metolachlor	1	3	3	3	Good	0.297146	In	34	0.0279758	0.957893
541	Diethyltoluamide	1	3	3	3	Good	0.292936	In	20	2.43e-06	0.999995
1067	Mecoprop dimethylammonium	1	3	3	3	Good	0.292936	In	20	2.43e-06	0.999995
1152	Mexacarbate	1	3	3	3	Good	0.292936	In	20	2.43e-06	0.999995
1314	Promecarb	1	3	3	3	Good	0.292936	In	20	2.43e-06	0.999995
1229	Oxpoconazole	1	3	3	3	Good	0.292077	In	20	0.0638832	0.832943
1230	Oxpoconazole fumarate	1	3	3	3	Good	0.292077	In	20	0.0638832	0.832943
950	Imiprothrin	1	3	3	3	Good	0.291521	In	34	0.0504872	0.915534
1516	Tetramethylfluthrin	1	3	3	3	Good	0.291521	In	34	0.0504872	0.915534
167	Bentazone	1	3	3	3	Good	0.288726	In	28	0.0662161	0.737799
349	Chlorotoluron	1	3	3	3	Good	0.288726	In	28	0.0662161	0.737799
801	Fluometuron	1	3	3	3	Good	0.288726	In	28	0.0662161	0.737799
1118	Methiuron	1	3	3	3	Good	0.288726	In	28	0.0662161	0.737799
1235	Parafluron	1	3	3	3	Good	0.288726	In	28	0.0662161	0.737799
345	Chloroprallethrin	1	3	3	3	Good	0.288311	In	34	0.0308555	0.953559
1279	Pindone	1	3	3	3	Good	0.288149	In	28	0.00466786	0.986927
123	Anilofos	1	3	3	3	Good	0.282919	In	27	0.158333	0.776239
893	Griseofulvin	1	3	3	3	Good	0.281892	In	20	0.00357228	0.992046
1251	Pentoxazone	1	3	3	3	Good	0.281892	In	20	0.00357228	0.992046
1489	Tebufloquin	1	3	3	3	Good	0.281892	In	20	0.00357228	0.992046
1620	Triticonazole	1	3	3	3	Good	0.281892	In	20	0.00357228	0.992046
568	Dimethrin	1	3	3	3	Good	0.281336	In	34	0.033129	0.950137
522	Diclocymet	1	3	3	3	Good	0.276267	In	20	0.060686	0.840914
942	Imazethapyr	1	3	3	3	Good	0.276267	In	20	0.060686	0.840914
943	Imazethapyr ammonium	1	3	3	3	Good	0.276267	In	20	0.060686	0.840914
1172	N-(3-chloro-2,6-dimethylphenyl)-2-methoxy-N-(tetrahydr-2-oxo-3-furanyl)acetamide	1	3	3	3	Good	0.276267	In	20	0.060686	0.840914
1220	Oxadiazon	1	3	3	3	Good	0.276267	In	20	0.060686	0.840914
1460	Spirodiclofen	1	3	3	3	Good	0.27569	In	34	0.0349694	0.947367
359	Chlorpyrifos-methyl	1	3	3	3	Good	0.274747	In	24	3.47e-06	0.999994
861	Fospirate	1	3	3	3	Good	0.274747	In	24	3.47e-06	0.999994
82	Allethrin	1	3	3	3	Good	0.270596	In	34	0.049266	0.924221
198	Bioallethrin	1	3	3	3	Good	0.270596	In	34	0.049266	0.924221
1422	S-bioallethrin	1	3	3	3	Good	0.270596	In	34	0.049266	0.924221
241	Bupirimate	1	3	3	3	Good	0.267357	In	34	0.171608	0.738196
560	Dimethachlor	1	3	3	3	Good	0.264713	In	20	0.0585216	0.846836
1159	Monalide	1	3	3	3	Good	0.264713	In	20	0.0585216	0.846836
1249	Pentanochlor	1	3	3	3	Good	0.264713	In	20	0.0585216	0.846836
1436	Silthiofam	1	3	3	3	Good	0.264713	In	20	0.0585216	0.846836
557	Dimefuron	1	3	3	3	Good	0.255387	In	20	0.0121399	0.972968
590	Dinoterb	1	3	3	3	Good	0.255387	In	20	0.0121399	0.972968
934	Imazamethabenz	1	3	3	3	Good	0.255387	In	20	0.0121399	0.972968
1354	Pyraclonil	1	3	3	3	Good	0.255387	In	20	0.0121399	0.972968
257	Butralin	1	3	3	3	Good	0.253656	In	34	0.0489557	0.931371
1280	Pinoxaden	1	3	3	3	Good	0.239663	In	34	0.0491679	0.924977
461	Cypyrafluone	1	3	3	3	Good	0.238718	In	20	0.0542794	0.86047
183	Benzovindiflupyr	1	3	3	3	Good	0.234507	In	28	0.0217737	0.939018
1133	Methylene bisthiocyanate	1	3	3	3	Good	0.234507	In	28	0.0217737	0.939018
1281	Piperalin	1	3	3	3	Good	0.233541	In	34	0.049393	0.92218
520	Dichlozoline	1	3	3	3	Good	0.227282	In	28	0.0809954	0.682922
1165	Monuron-TCA	1	3	3	3	Good	0.227282	In	28	0.0809954	0.682922
1427	Sedaxane	1	3	3	3	Good	0.226201	In	20	0.0525949	0.867192
62	Acetochlor	1	3	3	3	Good	0.222048	In	34	0.0524536	0.921051
76	Alachlor	1	3	3	3	Good	0.222048	In	34	0.0524536	0.921051
573	Dimexano	1	3	3	3	Good	0.222048	In	34	0.0524536	0.921051
718	Fenoxasulfone	1	3	3	3	Good	0.222048	In	34	0.0524536	0.921051
1250	Penthiopyrad	1	3	3	3	Good	0.222048	In	34	0.0524536	0.921051
1309	Proglinazine	1	3	3	3	Good	0.222048	In	34	0.0524536	0.921051
1313	Promacyl	1	3	3	3	Good	0.222048	In	34	0.0524536	0.921051
1563	Tralkoxydim	1	3	3	3	Good	0.222048	In	34	0.0524536	0.921051
234	Bromuconazole	1	3	3	3	Good	0.220726	In	20	0.0233438	0.94802
939	Imazapyr	1	3	3	3	Good	0.220726	In	20	0.0233438	0.94802
1305	Profluazol	1	3	3	3	Good	0.220726	In	20	0.0233438	0.94802
1504	Terbuchlor	1	3	3	3	Good	0.213742	In	34	0.102156	0.839471
263	Cafenstrole	1	3	3	3	Good	0.210556	In	20	0.0508646	0.875744
935	Imazamethabenz-methyl	1	3	3	3	Good	0.210556	In	20	0.0508646	0.875744
93	Ametoctradin	1	3	3	3	Good	0.209589	In	34	0.162668	0.753969
1393	Pyripropanol	1	3	3	3	Good	0.199063	In	20	0.0303462	0.932427
798	Flumioxazin	1	3	3	3	Good	0.194982	In	28	0.0343781	0.903716
601	Dipymetitrone	1	3	3	3	Good	0.192748	In	15	0.0619089	0.535725
643	Etaconazole	1	3	3	3	Good	0.19044	In	16	0.0482243	0.906605
948	Imidaclothiz	1	3	3	3	Good	0.19044	In	16	0.0482243	0.906605
1020	Karbutilate	1	3	3	3	Good	0.19044	In	16	0.0482243	0.906605
1221	Oxadixyl	1	3	3	3	Good	0.19044	In	16	0.0482243	0.906605
1640	Zoxamide	1	3	3	3	Good	0.19044	In	16	0.0482243	0.906605
1310	Proglinazine-ethyl	1	3	3	3	Good	0.188709	In	34	0.100134	0.848216
1395	Pyrisoxazole	1	3	3	3	Good	0.187571	In	28	0.0367414	0.897097
775	Fluchloraminopyr-tefuryl	1	3	3	3	Good	0.179383	In	34	0.0546149	0.897435
1244	Pendimethalin	1	3	3	3	Good	0.179383	In	34	0.0546149	0.897435
1595	Triclopyr-triethylammonium	1	3	3	3	Good	0.179383	In	34	0.0546149	0.897435
974	Iprodione	1	3	3	3	Good	0.17674	In	28	0.0401955	0.887423
1073	Medetomidine	1	3	3	3	Good	0.17674	In	28	0.0401955	0.887423
1352	Pyracarbolid	1	3	3	3	Good	0.17674	In	28	0.0401955	0.887423
446	Cymiazol	1	3	3	3	Good	0.176079	In	15	0.0755429	0.661663
474	Dehydroacetic acid	1	3	3	3	Good	0.176079	In	15	0.0755429	0.661663
1364	Pyrazachlor	1	3	3	3	Good	0.176079	In	15	0.0755429	0.661663
103	Aminocarb	1	3	3	3	Good	0.173462	In	20	0.0386217	0.914
317	Chloreturon	1	3	3	3	Good	0.173462	In	20	0.0386217	0.914
510	Dichlorprop-dimethylammonium	1	3	3	3	Good	0.173462	In	20	0.0386217	0.914
996	Isoprocarb	1	3	3	3	Good	0.173462	In	20	0.0386217	0.914
1050	MCPA-dimethylammonium	1	3	3	3	Good	0.173462	In	20	0.0386217	0.914
1061	M-cumenyl methylcarbamate	1	3	3	3	Good	0.173462	In	20	0.0386217	0.914
1080	Mefluidide	1	3	3	3	Good	0.173462	In	20	0.0386217	0.914
1114	Methiocarb	1	3	3	3	Good	0.173462	In	20	0.0386217	0.914
611	Dithiopyr	1	3	3	3	Good	0.16783	In	34	0.0563854	0.892156
641	Esprocarb	1	3	3	3	Good	0.16783	In	34	0.0563854	0.892156
371	Chromafenozide	1	3	3	3	Good	0.163619	In	16	0.0393827	0.9224
699	Fenethacarb	1	3	3	3	Good	0.163619	In	16	0.0393827	0.9224
706	Fenobucarb	1	3	3	3	Good	0.163619	In	16	0.0393827	0.9224
848	Fluxofenim	1	3	3	3	Good	0.163619	In	16	0.0393827	0.9224
865	Fufenozide	1	3	3	3	Good	0.163619	In	16	0.0393827	0.9224
1184	Neburon	1	3	3	3	Good	0.163619	In	16	0.0393827	0.9224
989	Isoflucypram	1	3	3	3	Good	0.16276	In	33	0.0665227	0.858438
1376	Pyridaben	1	3	3	3	Good	0.16276	In	33	0.0665227	0.858438
276	Carbanolate	1	3	3	3	Good	0.159409	In	28	0.045722	0.871945
314	Chlordimeform	1	3	3	3	Good	0.159409	In	28	0.045722	0.871945
459	Cypromid	1	3	3	3	Good	0.159409	In	28	0.045722	0.871945
813	Fluothiuron	1	3	3	3	Good	0.159409	In	28	0.045722	0.871945
1144	Metoxuron	1	3	3	3	Good	0.159409	In	28	0.045722	0.871945
1428	Semiamitraz hydrochloride	1	3	3	3	Good	0.159409	In	28	0.045722	0.871945
1522	Thiacloprid	1	3	3	3	Good	0.159409	In	28	0.045722	0.871945
1633	XMC	1	3	3	3	Good	0.159409	In	28	0.045722	0.871945
1636	Xylylcarb	1	3	3	3	Good	0.159409	In	28	0.045722	0.871945
1006	Isoval	1	3	3	3	Good	0.158832	In	20	0.0433506	0.90347
1468	Sulcotrione	1	3	3	3	Good	0.158832	In	20	0.0433506	0.90347
1019	Kappa-tefluthrin	1	3	3	3	Good	0.155785	In	33	0.0650213	0.86149
1307	Profluthrin	1	3	3	3	Good	0.155785	In	33	0.0650213	0.86149
1496	Tefluthrin	1	3	3	3	Good	0.155785	In	33	0.0650213	0.86149
193	Bicyclopyrone	1	3	3	3	Good	0.152019	In	34	0.0591117	0.884932
1283	Piperonyl cyclonene	1	3	3	3	Good	0.152019	In	34	0.0591117	0.884932
99	Amidochlor	1	3	3	3	Good	0.14695	In	33	0.0631935	0.865388
455	Cyproconazole	1	3	3	3	Good	0.14695	In	33	0.0631935	0.865388
714	Fenoxanil	1	3	3	3	Good	0.14695	In	33	0.0631935	0.865388
873	Furconazole	1	3	3	3	Good	0.14695	In	33	0.0631935	0.865388
936	Imazamox	1	3	3	3	Good	0.14695	In	33	0.0631935	0.865388
1327	Propiconazole	1	3	3	3	Good	0.14695	In	33	0.0631935	0.865388
1570	Trans-propiconazole	1	3	3	3	Good	0.14695	In	33	0.0631935	0.865388
874	Furethrin	1	3	3	3	Good	0.146373	In	34	0.0601625	0.882352
1462	Spiropidion	1	3	3	3	Good	0.146373	In	34	0.0601625	0.882352
1463	Spirotetramat	1	3	3	3	Good	0.146373	In	34	0.0601625	0.882352
75	Afidopyropen	1	3	3	3	Good	0.141318	In	34	0.154414	0.773502
1323	Propargite	1	3	3	3	Good	0.141279	In	34	0.098067	0.865294
239	Bufencarb	1	3	3	3	Good	0.135396	In	33	0.0609397	0.87054
1075	Medinoterb acetate	1	3	3	3	Good	0.135396	In	33	0.0609397	0.87054
181	Benzofluor	1	3	3	3	Good	0.12607	In	16	0.0270044	0.94546
1561	Tolylfluanid	1	3	3	3	Good	0.12607	In	16	0.0270044	0.94546
620	Ecolyst	1	3	3	3	Good	0.124339	In	34	0.0979115	0.871558
1306	Profluralin	1	3	3	3	Good	0.124339	In	34	0.0979115	0.871558
580	Dinitramine	1	3	3	3	Good	0.119642	In	33	0.0581454	0.877663
586	Dinosam	1	3	3	3	Good	0.119642	In	33	0.0581454	0.877663
21	1,4-dimethylnaphthalene	1	3	3	3	Good	0.11765	In	15	0.0499129	0.612257
603	Diquat	1	3	3	3	Good	0.11765	In	15	0.0499129	0.612257
1192	Nitrapyrin	1	3	3	3	Good	0.11765	In	15	0.0499129	0.612257
235	Bromuron	1	3	3	3	Good	0.113497	In	15	0.0559572	0.725285
612	Diuron	1	3	3	3	Good	0.113497	In	15	0.0559572	0.725285
740	Fenuron	1	3	3	3	Good	0.113497	In	15	0.0559572	0.725285
741	Fenuron-TCA	1	3	3	3	Good	0.113497	In	15	0.0559572	0.725285
1164	Monuron	1	3	3	3	Good	0.113497	In	15	0.0559572	0.725285
131	Azaconazole	1	3	3	3	Good	0.105191	In	28	0.0526134	0.827952
132	Azafenidin	1	3	3	3	Good	0.105191	In	28	0.0526134	0.827952
799	Flumipropyn	1	3	3	3	Good	0.105191	In	28	0.0526134	0.827952
1171	Myclozolin	1	3	3	3	Good	0.105191	In	28	0.0526134	0.827952
1551	Tiocarbazil	1	3	3	3	Good	0.104224	In	34	0.0981309	0.862958
141	Azothoate	1	3	3	3	Good	0.100421	In	24	0.226703	0.561406
1350	Pyflubumide	1	3	3	3	Good	0.0985915	In	34	0.0982706	0.860549
150	Benazolin-dimethylammonium	1	3	3	3	Good	0.0979653	In	28	0.065316	0.817067
166	Bentaluron	1	3	3	3	Good	0.0979653	In	28	0.065316	0.817067
1245	Penflufen	1	3	3	3	Good	0.0968845	In	33	0.054768	0.888162
1488	Tebufenpyrad	1	3	3	3	Good	0.0968845	In	33	0.054768	0.888162
773	Fluchloralin	1	3	3	3	Good	0.0927315	In	33	0.0631925	0.907411
1072	Mecoprop-P isobutyl	1	3	3	3	Good	0.0927315	In	33	0.0631925	0.907411
1486	Tebuconazole	1	3	3	3	Good	0.0927315	In	33	0.0631925	0.907411
623	Eglinazine-ethyl	1	3	3	3	Good	0.0885784	In	34	0.098603	0.856268
975	Iprovalicarb	1	3	3	3	Good	0.0885784	In	34	0.098603	0.856268
409	Coumatetralyl	1	3	3	3	Good	0.0871466	In	15	0.0477106	0.755887
1497	Tefuryltrione	1	3	3	3	Good	0.076062	In	34	0.0991681	0.850916
83	Allidochlor	1	3	3	3	Good	0.0697467	In	16	0.00843703	0.982296
506	Dichlormid	1	3	3	3	Good	0.0697467	In	16	0.00843703	0.982296
348	Chlorotoluene	1	3	3	3	Good	0.0640084	In	15	0.0470058	0.681809
811	Fluoromidine	1	3	3	3	Good	0.0640084	In	15	0.0470058	0.681809
537	Dienochlor	1	3	3	3	Good	0.0634314	In	15	0.0402886	0.785725
559	Dimetachlone	1	3	3	3	Good	0.0634314	In	15	0.0402886	0.785725
1107	Methabenzthiazuron	1	3	3	3	Good	0.0634314	In	15	0.0402886	0.785725
1407	Quinofumelin	1	3	3	3	Good	0.0634314	In	15	0.0402886	0.785725
622	Eglinazine	1	3	3	3	Good	0.0611235	In	33	0.0513553	0.905176
1337	Proquinazid	1	3	3	3	Good	0.0611235	In	33	0.0513553	0.905176
1342	Prothioconazole	1	3	3	3	Good	0.0611235	In	33	0.0513553	0.905176
1438	Simeconazole	1	3	3	3	Good	0.0611235	In	33	0.0513553	0.905176
1573	Triadimenol	1	3	3	3	Good	0.0611235	In	33	0.0513553	0.905176
1628	Verbutin	1	3	3	3	Good	0.0611235	In	33	0.0513553	0.905176
125	Aramite	1	3	3	3	Good	0.0593926	In	34	0.148358	0.798321
997	Isopropalin	1	3	3	3	Good	0.0593926	In	34	0.148358	0.798321
1292	P-nonylphenol	1	3	3	3	Good	0.0593926	In	34	0.148358	0.798321
1333	Propyl isome	1	3	3	3	Good	0.0593926	In	34	0.148358	0.798321
1535	Thiocyclam	1	3	3	3	Good	0.0593926	In	34	0.148358	0.798321
1537	Thiodicarb	1	3	3	3	Good	0.0593926	In	34	0.148358	0.798321
73	Acynonapyr	1	3	3	3	Good	0.0572875	In	34	0.100321	0.842889
378	Clacyfos	1	3	3	3	Good	0.0525089	In	27	0.161543	0.761528
998	Isopropyl myristate	1	3	3	3	Good	0.0521443	In	19	0.364849	0.659926
155	Benfluralin	1	3	3	3	Good	0.0500665	In	27	0.0990688	0.871289
599	Dipropalin	1	3	3	3	Good	0.0500665	In	27	0.0990688	0.871289
1303	Prodiamine	1	3	3	3	Good	0.0500665	In	27	0.0990688	0.871289
1609	Trifluralin	1	3	3	3	Good	0.0500665	In	27	0.0990688	0.871289
415	Crotamiton	1	3	3	3	Good	0.0474229	In	28	0.062528	0.78246
259	Buturon	1	3	3	3	Good	0.046762	In	14	0.077003	0.720504
288	Carboxin	1	3	3	3	Good	0.046762	In	14	0.077003	0.720504
341	Chloroneb	1	3	3	3	Good	0.046762	In	14	0.077003	0.720504
395	Clopyralid-olamine	1	3	3	3	Good	0.046762	In	14	0.077003	0.720504
1168	Mucochloric anhydride	1	3	3	3	Good	0.046762	In	14	0.077003	0.720504
1231	Oxycarboxin	1	3	3	3	Good	0.046762	In	14	0.077003	0.720504
1336	Propyzamide	1	3	3	3	Good	0.046762	In	14	0.077003	0.720504
1347	Prynachlor	1	3	3	3	Good	0.046762	In	14	0.077003	0.720504
1360	Pyranocoumarin	1	3	3	3	Good	0.046762	In	14	0.077003	0.720504
1413	Quintrione	1	3	3	3	Good	0.046762	In	14	0.077003	0.720504
1527	Thicyofen	1	3	3	3	Good	0.046762	In	14	0.077003	0.720504
1604	Trifludimoxazin	1	3	3	3	Good	0.046762	In	14	0.077003	0.720504
433	Cyclopyrimorate	1	3	3	3	Good	0.0441841	In	33	0.0506651	0.913466
1069	Mecoprop methyl	1	3	3	3	Good	0.0441451	In	16	2.7e-06	0.999994
1331	Propoxur	1	3	3	3	Good	0.0441451	In	16	2.7e-06	0.999994
1391	Pyrimorph	1	3	3	3	Good	0.0441451	In	16	2.7e-06	0.999994
918	Hexadecanoic acid	1	3	3	3	Good	0.0438614	In	19	0.36516	0.658203
926	Hydroprene	1	3	3	3	Good	0.0393063	In	34	0.263941	0.659185
1431	S-hydroprene	1	3	3	3	Good	0.0393063	In	34	0.263941	0.659185
1028	Lavandulyl senecioate	1	3	3	3	Good	0.0385129	In	27	0.0951418	0.875757
379	Clethodim	1	3	3	3	Good	0.0360968	In	34	0.203546	0.725518
591	Dinoterb acetate	1	3	3	3	Good	0.0343027	In	33	0.050556	0.918364
1056	MCPA-isopropyl	1	3	3	3	Good	0.0343027	In	33	0.050556	0.918364
1214	Orbencarb	1	3	3	3	Good	0.0343027	In	33	0.050556	0.918364
84	Alloxydim	1	3	3	3	Good	0.0328873	In	27	0.146375	0.780832
243	Butachlor	1	3	3	3	Good	0.0328873	In	27	0.146375	0.780832
60	Acetamiprid	1	3	3	3	Good	0.0300925	In	28	0.0662161	0.768812
357	Chlorpropham	1	3	3	3	Good	0.0300925	In	28	0.0662161	0.768812
387	Clofibric acid	1	3	3	3	Good	0.0300925	In	28	0.0662161	0.768812
806	Fluoridamid	1	3	3	3	Good	0.0300925	In	28	0.0662161	0.768812
1066	Mecoprop	1	3	3	3	Good	0.0300925	In	28	0.0662161	0.768812
1291	Plifenate	1	3	3	3	Good	0.0300925	In	28	0.0662161	0.768812
1326	Propham	1	3	3	3	Good	0.0300925	In	28	0.0662161	0.768812
840	Fluthiacet	1	3	3	3	Good	0.0295155	In	16	0.0048254	0.989692
1092	Mesotrione	1	3	3	3	Good	0.0295155	In	16	0.0048254	0.989692
1498	Tembotrione	1	3	3	3	Good	0.0264684	In	33	0.0408884	0.938067
1582	Triaziflam	1	3	3	3	Good	0.0264684	In	33	0.0408884	0.938067
634	Epofenonane	1	3	3	3	Good	0.0260537	In	34	0.262356	0.662022
295	Chlobenthiazone	1	3	3	3	Good	0.0237772	In	15	0.0486633	0.596583
327	Chlorfluazole	1	3	3	3	Good	0.0237772	In	15	0.0486633	0.596583
1196	N-methyl saccharine	1	3	3	3	Good	0.0237772	In	15	0.0486633	0.596583
1272	Phthalide	1	3	3	3	Good	0.0237772	In	15	0.0486633	0.596583
555	Dimefluthrin	1	3	3	3	Good	0.0227028	In	27	0.089768	0.881946
192	Bethoxazin	1	3	3	3	Good	0.0224688	In	15	0.0274689	0.843217
1094	Metalaxyl	1	3	3	3	Good	0.0176333	In	33	0.0379145	0.942312
1095	Metalaxyl-M	1	3	3	3	Good	0.0176333	In	33	0.0379145	0.942312
1136	Metobenzuron	1	3	3	3	Good	0.017235	In	33	0.0508817	0.909087
940	Imazaquin	1	3	3	3	Good	0.0168399	In	28	0.0692018	0.758376
1054	MCPA-isobutyl	1	3	3	3	Good	0.00607973	In	33	0.0340255	0.947921
1589	Trichlamide	1	3	3	3	Good	0.00607973	In	33	0.0340255	0.947921
1228	Oxolinic acid	1	3	3	3	Good	0.00343609	In	14	0.0631816	0.758559
438	Cyenopyrafen	1	3	3	3	Good	-0.00114125	In	33	0.031595	0.95146
456	Cyprodinil	1	3	3	3	Good	-0.00209241	In	28	0.073678	0.743467
1002	Isopyrimol	1	3	3	3	Good	-0.00209241	In	28	0.073678	0.743467
1101	Metazachlor	1	3	3	3	Good	-0.00209241	In	28	0.073678	0.743467
1363	Pyrasulfotole	1	3	3	3	Good	-0.00209241	In	28	0.073678	0.743467
168	Benthiavalicarb	1	3	3	3	Good	-0.00324636	In	33	0.0521125	0.897956
700	Fenfluthrin	1	3	3	3	Good	-0.00324636	In	33	0.0521125	0.897956
841	Fluthiacet-methyl	1	3	3	3	Good	-0.00324636	In	33	0.0521125	0.897956
1568	Transfluthrin	1	3	3	3	Good	-0.00324636	In	33	0.0521125	0.897956
1275	Picloram-isoctyl	1	3	3	3	Good	-0.00497727	In	27	0.134388	0.792711
1596	Tricyclazole	1	3	3	3	Good	-0.0075137	In	15	0.052064	0.530296
1236	Paraquat	1	3	3	3	Good	-0.0116668	In	15	0.0167858	0.897971
1415	Rabenzazole	1	3	3	3	Good	-0.0116668	In	15	0.0167858	0.897971
310	Chlorbromuron	1	3	3	3	Good	-0.0158199	In	14	0.0570387	0.776794
755	Flonicamid	1	3	3	3	Good	-0.0158199	In	14	0.0570387	0.776794
1034	Linuron	1	3	3	3	Good	-0.0158199	In	14	0.0570387	0.776794
1137	Metobromuron	1	3	3	3	Good	-0.0158199	In	14	0.0570387	0.776794
1140	Metolcarb	1	3	3	3	Good	-0.0158199	In	14	0.0570387	0.776794
1161	Monolinuron	1	3	3	3	Good	-0.0158199	In	14	0.0570387	0.776794
1320	Propanil	1	3	3	3	Good	-0.0158199	In	14	0.0570387	0.776794
1121	Methoprene	1	3	3	3	Good	-0.0202597	In	19	0.303158	0.622505
1442	S-methoprene	1	3	3	3	Good	-0.0202597	In	19	0.303158	0.622505
121	Ancymidol	1	3	3	3	Good	-0.024126	In	16	0.0225087	0.951918
206	Bisthiosemi	1	3	3	3	Good	-0.024126	In	16	0.0225087	0.951918
504	Dichlofluanid	1	3	3	3	Good	-0.024126	In	16	0.0225087	0.951918
578	Diniconazole	1	3	3	3	Good	-0.024126	In	16	0.0225087	0.951918
579	Diniconazole-M	1	3	3	3	Good	-0.024126	In	16	0.0225087	0.951918
672	Ethyl-DDD	1	3	3	3	Good	-0.024126	In	16	0.0225087	0.951918
767	Fluazolate	1	3	3	3	Good	-0.024126	In	16	0.0225087	0.951918
824	Flupyradifurone	1	3	3	3	Good	-0.024126	In	16	0.0225087	0.951918
836	Flurprimidol	1	3	3	3	Good	-0.024126	In	16	0.0225087	0.951918
857	Formparanate	1	3	3	3	Good	-0.024126	In	16	0.0225087	0.951918
941	Imazaquin methyl	1	3	3	3	Good	-0.024126	In	16	0.0225087	0.951918
947	Imidacloprid	1	3	3	3	Good	-0.024126	In	16	0.0225087	0.951918
1011	Isoxaflutole	1	3	3	3	Good	-0.024126	In	16	0.0225087	0.951918
1218	Oxabetrinil	1	3	3	3	Good	-0.024126	In	16	0.0225087	0.951918
1219	Oxadiargyl	1	3	3	3	Good	-0.024126	In	16	0.0225087	0.951918
1624	Uniconazole	1	3	3	3	Good	-0.024126	In	16	0.0225087	0.951918
375	Ciobutide	1	3	3	3	Good	-0.0313514	In	28	0.0809954	0.720425
425	Cyclanilide	1	3	3	3	Good	-0.0313514	In	28	0.0809954	0.720425
1470	Sulfentrazone	1	3	3	3	Good	-0.0313514	In	28	0.0809954	0.720425
101	Amidosulfuron	1	3	3	3	Good	-0.0324322	In	33	0.0210625	0.967109
1027	Lancotrione	1	3	3	3	Good	-0.0324322	In	33	0.0210625	0.967109
294	Chinomethionat	1	3	3	3	Good	-0.0325464	In	15	0.0558819	0.477266
1112	Methfuroxam	1	3	3	3	Good	-0.0337004	In	14	0.0513346	0.794529
169	Benthiavalicarb-isopropyl	1	3	3	3	Good	-0.0365852	In	27	0.0696162	0.905955
538	Diethatyl ethyl	1	3	3	3	Good	-0.0365852	In	27	0.0696162	0.905955
539	Diethofencarb	1	3	3	3	Good	-0.0365852	In	27	0.0696162	0.905955
636	Epsilon-metofluthrin	1	3	3	3	Good	-0.0365852	In	27	0.0696162	0.905955
910	Heptafluthrin	1	3	3	3	Good	-0.0365852	In	27	0.0696162	0.905955
1138	Metofluthrin	1	3	3	3	Good	-0.0365852	In	27	0.0696162	0.905955
1338	Prosulfocarb	1	3	3	3	Good	-0.0365852	In	27	0.0696162	0.905955
1459	Spirobudifen	1	3	3	3	Good	-0.0365852	In	27	0.0696162	0.905955
1558	Tolprocarb	1	3	3	3	Good	-0.0365852	In	27	0.0696162	0.905955
222	Bromobonil	1	3	3	3	Good	-0.037907	In	16	0.051906	0.877927
1242	Penconazole	1	3	3	3	Good	-0.037907	In	16	0.051906	0.877927
872	Furathiocarb	1	3	3	3	Good	-0.0407383	In	27	0.123231	0.804266
744	Ferimzone	1	3	3	3	Good	-0.0450057	In	28	0.0845459	0.709673
681	Etoxazole	1	3	3	3	Good	-0.0461596	In	16	0.0511554	0.882429
1255	Pethoxamid	1	3	3	3	Good	-0.0480776	In	33	0.0157962	0.975128
393	Cloproxydim	1	3	3	3	Good	-0.0490445	In	27	0.249723	0.656818
1284	Piperonyl sulfoxide	1	3	3	3	Good	-0.0490445	In	27	0.249723	0.656818
1510	Tetflupyrolimet	1	3	3	3	Good	-0.0529107	In	28	0.086635	0.703448
25	1-methylnaphthalene	1	3	3	3	Good	-0.0530277	In	15	0.0595927	0.433878
50	2-methyl naphthalene	1	3	3	3	Good	-0.0530277	In	15	0.0595927	0.433878
1618	Triprene	1	3	3	3	Good	-0.0531975	In	5	0.30672	0.626774
488	Diafenthiuron	1	3	3	3	Good	-0.0541997	In	33	0.0137355	0.978303
1349	Pydiflumetofen	1	3	3	3	Good	-0.05957	In	16	0.0502268	0.889845
178	Benzipram	1	3	3	3	Good	-0.0636514	In	16	0.0355384	0.924084
1243	Pencycuron	1	3	3	3	Good	-0.0636514	In	16	0.0355384	0.924084
1384	Pyrifluquinazon	1	3	3	3	Good	-0.0636514	In	16	0.0355384	0.924084
87	Alorac	1	3	3	3	Good	-0.0658853	In	14	0.0410673	0.82858
1351	Pymetrozine	1	3	3	3	Good	-0.0658853	In	14	0.0410673	0.82858
5	(R)-hexaconazole	1	3	3	3	Good	-0.0681932	In	33	0.00902533	0.985636
917	Hexaconazole	1	3	3	3	Good	-0.0681932	In	33	0.00902533	0.985636
796	Flumiclorac	1	3	3	3	Good	-0.0710624	In	16	0.0379815	0.918865
820	Flupropacil	1	3	3	3	Good	-0.0710624	In	16	0.0379815	0.918865
1519	Thenylchlor	1	3	3	3	Good	-0.0710624	In	16	0.0379815	0.918865
1562	Topramezone	1	3	3	3	Good	-0.0710624	In	16	0.0379815	0.918865
258	Butroxydim	1	3	3	3	Good	-0.0720292	In	27	0.113636	0.814657
1191	Nitralin	1	3	3	3	Good	-0.0792502	In	27	0.111449	0.817094
289	Carfentrazone	1	3	3	3	Good	-0.0818938	In	16	0.0415522	0.911237
368	Chlozolinate	1	3	3	3	Good	-0.0818938	In	16	0.0415522	0.911237
686	Fenaminosulf	1	3	3	3	Good	-0.0825547	In	14	0.0906931	0.613763
774	Fluchloraminopyr	1	3	3	3	Good	-0.0825547	In	14	0.0906931	0.613763
1077	Mefenpyr	1	3	3	3	Good	-0.0825547	In	14	0.0906931	0.613763
1225	Oxaziclomefone	1	3	3	3	Good	-0.0825547	In	14	0.0906931	0.613763
384	Cloethocarb	1	3	3	3	Good	-0.0851716	In	16	0.0495131	0.904343
654	Ethiofencarb	1	3	3	3	Good	-0.0851716	In	16	0.0495131	0.904343
1053	MCPA-ethyl	1	3	3	3	Good	-0.0851716	In	16	0.0495131	0.904343
1059	MCPA-thioethyl	1	3	3	3	Good	-0.0851716	In	16	0.0495131	0.904343
1060	MCPB	1	3	3	3	Good	-0.0851716	In	16	0.0495131	0.904343
1124	Methoxyfenozide	1	3	3	3	Good	-0.0851716	In	16	0.0495131	0.904343
1487	Tebufenozide	1	3	3	3	Good	-0.0851716	In	16	0.0495131	0.904343
286	Carbosulfan	1	3	3	3	Good	-0.0865935	In	27	0.23977	0.665132
705	Fenmezoditiaz	1	3	3	3	Good	-0.0940471	In	14	0.0320834	0.860862
498	Dicamba diglycolamine	1	3	3	3	Good	-0.095014	In	33	2.53e-06	0.999996
587	Dinoseb acetate	1	3	3	3	Good	-0.095014	In	33	2.53e-06	0.999996
1158	Momfluorothrin	1	3	3	3	Good	-0.0958733	In	27	0.0494643	0.931308
323	Chlorfenprop-methyl	1	3	3	3	Good	-0.0992242	In	16	0.0472652	0.899033
512	Dichlorprop-methyl	1	3	3	3	Good	-0.0992242	In	16	0.0472652	0.899033
516	Dichlorprop-methyl	1	3	3	3	Good	-0.0992242	In	16	0.0472652	0.899033
712	Fenoprop-methyl	1	3	3	3	Good	-0.0992242	In	16	0.0472652	0.899033
952	Indanofan	1	3	3	3	Good	-0.0992242	In	16	0.0472652	0.899033
1057	MCPA-methyl	1	3	3	3	Good	-0.0992242	In	16	0.0472652	0.899033
159	Benomyl	1	3	3	3	Good	-0.0998011	In	16	0.0497477	0.895026
783	Flufenacet	1	3	3	3	Good	-0.0998011	In	16	0.0497477	0.895026
1572	Triadimefon	1	3	3	3	Good	-0.0998011	In	16	0.0497477	0.895026
249	Butenachlor	1	3	3	3	Good	-0.102848	In	27	0.0470935	0.934385
1083	Meperfluthrin	1	3	3	3	Good	-0.102848	In	27	0.0470935	0.934385
1416	Renofluthrin	1	3	3	3	Good	-0.102848	In	27	0.0470935	0.934385
473	Defenuron	1	3	3	3	Good	-0.105539	In	15	0.0125928	0.91476
1547	Tiadinil	1	3	3	3	Good	-0.106848	In	14	0.0279998	0.876383
1308	Profoxydim	1	3	3	3	Good	-0.107473	In	27	0.168014	0.740076
1117	Methiozolin	1	3	3	3	Good	-0.109267	In	16	0.0501466	0.888998
1181	Napropamide	1	3	3	3	Good	-0.109267	In	16	0.0501466	0.888998
1182	Napropamide-M	1	3	3	3	Good	-0.109267	In	16	0.0501466	0.888998
1420	Saflufenacil	1	3	3	3	Good	-0.109267	In	16	0.0501466	0.888998
1155	Mivorilaner	1	3	3	3	Good	-0.112082	In	33	0.00574753	0.99072
1362	Pyrapropoyne	1	3	3	3	Good	-0.112082	In	33	0.00574753	0.99072
464	Daimuron	1	3	3	3	Good	-0.115686	In	14	0.0819097	0.634498
953	Indazapyroxamet	1	3	3	3	Good	-0.115686	In	14	0.0819097	0.634498
1132	Methyldymron	1	3	3	3	Good	-0.115686	In	14	0.0819097	0.634498
984	Isocycloseram	1	3	3	3	Good	-0.120791	In	16	0.050887	0.881659
710	Fenoprop-butyl	1	3	3	3	Good	-0.123237	In	27	0.0401635	0.943495
713	Fenothiocarb	1	3	3	3	Good	-0.123237	In	27	0.0401635	0.943495
1049	MCPA-butyl	1	3	3	3	Good	-0.123237	In	27	0.0401635	0.943495
1051	MCPA-diolamine	1	3	3	3	Good	-0.123237	In	27	0.0401635	0.943495
64	Acetoprole	1	3	3	3	Good	-0.125881	In	14	0.0792949	0.641163
423	Cyazofamid	1	3	3	3	Good	-0.125881	In	14	0.0792949	0.641163
658	Ethiprole	1	3	3	3	Good	-0.125881	In	14	0.0792949	0.641163
1534	Thifluzamide	1	3	3	3	Good	-0.125881	In	14	0.0792949	0.641163
782	Fluensulfone	1	3	3	3	Good	-0.131409	In	16	0.0578752	0.876369
1008	Isoxachlortole	1	3	3	3	Good	-0.131409	In	16	0.0578752	0.876369
290	Carfentrazone-ethyl	1	3	3	3	Good	-0.132563	In	33	0.0126415	0.979588
988	Isofetamid	1	3	3	3	Good	-0.132563	In	33	0.0126415	0.979588
1102	Metazosulfuron	1	3	3	3	Good	-0.132563	In	33	0.0126415	0.979588
1169	Myclobutanil	1	3	3	3	Good	-0.132563	In	33	0.0126415	0.979588
1170	Myclobutanil hydrochloride	1	3	3	3	Good	-0.132563	In	33	0.0126415	0.979588
1174	N1,N2-diallyl-N2-dichloroacetylglycinamide	1	3	3	3	Good	-0.132563	In	33	0.0126415	0.979588
818	Flupentiofenox	1	3	3	3	Good	-0.134294	In	27	0.160869	0.747597
187	Benzthiazuron	1	3	3	3	Good	-0.13683	In	15	0.0223857	0.848473
849	Folpet	1	3	3	3	Good	-0.13683	In	15	0.0223857	0.848473
1111	Methazole	1	3	3	3	Good	-0.13683	In	15	0.0223857	0.848473
746	Fipronil	1	3	3	3	Good	-0.140983	In	14	0.0171102	0.920644
795	Flumetylsulforim	1	3	3	3	Good	-0.140983	In	14	0.0171102	0.920644
1147	Metsulfovax	1	3	3	3	Good	-0.140983	In	14	0.0171102	0.920644
1201	Norflurazon	1	3	3	3	Good	-0.140983	In	14	0.0171102	0.920644
1386	Pyrimethanil	1	3	3	3	Good	-0.140983	In	14	0.0171102	0.920644
1630	Vinclozolin	1	3	3	3	Good	-0.140983	In	14	0.0171102	0.920644
301	Chloraniformethan	1	3	3	3	Good	-0.145137	In	14	0.0744929	0.654142
322	Chlorfenprop	1	3	3	3	Good	-0.145137	In	14	0.0744929	0.654142
392	Cloprop	1	3	3	3	Good	-0.145137	In	14	0.0744929	0.654142
500	Dicamba methyl	1	3	3	3	Good	-0.145137	In	14	0.0744929	0.654142
508	Dichlorprop	1	3	3	3	Good	-0.145137	In	14	0.0744929	0.654142
513	Dichlorprop-P	1	3	3	3	Good	-0.145137	In	14	0.0744929	0.654142
517	Dichlorprop-P	1	3	3	3	Good	-0.145137	In	14	0.0744929	0.654142
707	Fenoprop	1	3	3	3	Good	-0.145137	In	14	0.0744929	0.654142
1047	MCPA	1	3	3	3	Good	-0.145137	In	14	0.0744929	0.654142
1058	MCPA-olamine	1	3	3	3	Good	-0.145137	In	14	0.0744929	0.654142
133	Azamethiphos	1	3	3	3	Good	-0.153443	In	16	0.0543892	0.860865
280	Carbetamide	1	3	3	3	Good	-0.153443	In	16	0.0543892	0.860865
380	Climbazole	1	3	3	3	Good	-0.153443	In	16	0.0543892	0.860865
398	Clothianidin	1	3	3	3	Good	-0.153443	In	16	0.0543892	0.860865
554	Diflumetorim	1	3	3	3	Good	-0.153443	In	16	0.0543892	0.860865
679	Etinofen	1	3	3	3	Good	-0.153443	In	16	0.0543892	0.860865
1375	Pyributicarb	1	3	3	3	Good	-0.153443	In	16	0.0543892	0.860865
1531	Thiencarbazone-methyl	1	3	3	3	Good	-0.153443	In	16	0.0543892	0.860865
1550	Tigolaner	1	3	3	3	Good	-0.153443	In	16	0.0543892	0.860865
1070	Mecoprop trolamine	1	3	3	3	Good	-0.15441	In	27	0.155646	0.753339
151	Benazolin-ethyl	1	3	3	3	Good	-0.160668	In	16	0.0675206	0.855764
231	Bromoxynil-butanoate	1	3	3	3	Good	-0.160668	In	16	0.0675206	0.855764
671	Ethylchlozate	1	3	3	3	Good	-0.160668	In	16	0.0675206	0.855764
855	Formetanate	1	3	3	3	Good	-0.160668	In	16	0.0675206	0.855764
1530	Thiencarbazone	1	3	3	3	Good	-0.160668	In	16	0.0675206	0.855764
1637	Zarilamid	1	3	3	3	Good	-0.160668	In	16	0.0675206	0.855764
1007	Isoxaben	1	3	3	3	Good	-0.161749	In	27	0.0270734	0.961196
1099	Metamitron	1	3	3	3	Good	-0.161863	In	15	0.03022	0.795444
581	Dinobuton	1	3	3	3	Good	-0.165902	In	27	0.0863287	0.847506
1217	Oryzalin	1	3	3	3	Good	-0.165902	In	27	0.0863287	0.847506
356	Chlorprocarb	1	3	3	3	Good	-0.167224	In	33	0.0243083	0.96075
647	Ethalfluralin	1	3	3	3	Good	-0.167224	In	33	0.0243083	0.96075
1512	Tetraconazole	1	3	3	3	Good	-0.167224	In	33	0.0243083	0.96075
972	Ipflufenoquin	1	3	3	3	Good	-0.171487	In	14	0.0682709	0.672779
815	Fluoxapiprolin	1	3	3	3	Good	-0.171762	In	27	0.02367	0.965908
1023	Kinoprene	1	3	3	3	Good	-0.174208	In	27	0.21769	0.685375
1068	Mecoprop etexyl	1	3	3	3	Good	-0.174208	In	27	0.21769	0.685375
1071	Mecoprop-P etexyl	1	3	3	3	Good	-0.174208	In	27	0.21769	0.685375
319	Chlorfenapyr	1	3	3	3	Good	-0.174322	In	16	0.0720218	0.846149
1385	Pyriftalid	1	3	3	3	Good	-0.174322	In	16	0.0720218	0.846149
1078	Mefenpyr diethyl	1	3	3	3	Good	-0.177394	In	27	0.0217555	0.968579
113	Amitraz	1	3	3	3	Good	-0.182227	In	16	0.0746277	0.840582
525	Diclomezine	1	3	3	3	Good	-0.182344	In	15	0.0366299	0.752056
1400	Quinacetol	1	3	3	3	Good	-0.182344	In	15	0.0366299	0.752056
1405	Quinmerac	1	3	3	3	Good	-0.182344	In	15	0.0366299	0.752056
442	Cyhalodiamide	1	3	3	3	Good	-0.187578	In	16	0.0599283	0.839126
1187	Nicofluprole	1	3	3	3	Good	-0.187578	In	16	0.0599283	0.839126
689	Fenapanil	1	3	3	3	Good	-0.188887	In	33	0.0316	0.948976
372	Cinidon-ethyl	1	3	3	3	Good	-0.192968	In	16	0.0609469	0.835694
321	Chlorfenethol	1	3	3	3	Good	-0.194625	In	14	2.05e-06	0.99999
381	Cliodinate	1	3	3	3	Good	-0.194625	In	14	2.05e-06	0.99999
469	DDD	1	3	3	3	Good	-0.194625	In	14	2.05e-06	0.99999
470	DDT	1	3	3	3	Good	-0.194625	In	14	2.05e-06	0.99999
529	Dicofol	1	3	3	3	Good	-0.194625	In	14	2.05e-06	0.99999
614	DNOC	1	3	3	3	Good	-0.194625	In	14	2.05e-06	0.99999
1082	Mepanipyrim	1	3	3	3	Good	-0.194625	In	14	2.05e-06	0.99999
1207	O,O'-DDT	1	3	3	3	Good	-0.194625	In	14	2.05e-06	0.99999
1208	O,P'-DDT	1	3	3	3	Good	-0.194625	In	14	2.05e-06	0.99999
1276	Picloram-methyl	1	3	3	3	Good	-0.194625	In	14	2.05e-06	0.99999
1444	Sodium 5-nitroguaiacolate	1	3	3	3	Good	-0.194625	In	14	2.05e-06	0.99999
315	Chloretazate	1	3	3	3	Good	-0.195202	In	14	0.0631055	0.690483
1143	Metoxadiazone	1	3	3	3	Good	-0.195202	In	14	0.0631055	0.690483
1346	Proximpham	1	3	3	3	Good	-0.195202	In	14	0.0631055	0.690483
1195	Nitrothal-isopropyl	1	3	3	3	Good	-0.19751	In	27	0.0149183	0.978239
156	Benfuracarb	1	3	3	3	Good	-0.199241	In	27	0.211728	0.691387
835	Fluroxypyr-meptyl	1	3	3	3	Good	-0.199241	In	27	0.211728	0.691387
1429	Sesamex	1	3	3	3	Good	-0.199241	In	27	0.211728	0.691387
451	Cyperquat	1	3	3	3	Good	-0.199412	In	15	0.0419714	0.715899
452	Cyperquat iodide	1	3	3	3	Good	-0.199412	In	15	0.0419714	0.715899
780	Fludioxonil	1	3	3	3	Good	-0.199412	In	15	0.0419714	0.715899
1408	Quinonamid	1	3	3	3	Good	-0.199412	In	15	0.0419714	0.715899
1566	Tralopyril	1	3	3	3	Good	-0.199412	In	15	0.0419714	0.715899
152	Bencarbazone	1	3	3	3	Good	-0.211211	In	16	0.0646384	0.824076
1064	Mecarbinzid	1	3	3	3	Good	-0.211211	In	16	0.0646384	0.824076
771	Flucarbazone	1	3	3	3	Good	-0.211871	In	16	0.0844	0.819707
804	Fluopyram	1	3	3	3	Good	-0.211871	In	16	0.0844	0.819707
1123	Methoxychlor	1	3	3	3	Good	-0.211871	In	16	0.0844	0.819707
639	Erbon	1	3	3	3	Good	-0.214488	In	33	0.0402175	0.935061
723	Fenpropathrin	1	3	3	3	Good	-0.214488	In	33	0.0402175	0.935061
1189	Nitenpyram	1	3	3	3	Good	-0.214488	In	33	0.0402175	0.935061
330	Chlorfluren methyl	1	3	3	3	Good	-0.216082	In	14	0.00684695	0.965507
332	Chlorflurenol methyl	1	3	3	3	Good	-0.216082	In	14	0.00684695	0.965507
777	Flucofuron	1	3	3	3	Good	-0.216082	In	14	0.00684695	0.965507
585	Dinopenton	1	3	3	3	Good	-0.22012	In	27	0.13956	0.772726
596	Diphenamid	1	3	3	3	Good	-0.223364	In	14	0.0576638	0.712757
1125	Methoxyphenone	1	3	3	3	Good	-0.223364	In	14	0.0576638	0.712757
511	Dichlorprop-isoctyl	1	3	3	3	Good	-0.225746	In	27	0.20561	0.697869
514	Dichlorprop-P-etexyl	1	3	3	3	Good	-0.225746	In	27	0.20561	0.697869
515	Dichlorprop-isoctyl	1	3	3	3	Good	-0.225746	In	27	0.20561	0.697869
518	Dichlorprop-P-etexyl	1	3	3	3	Good	-0.225746	In	27	0.20561	0.697869
711	Fenoprop-isoctyl	1	3	3	3	Good	-0.225746	In	27	0.20561	0.697869
1052	MCPA-etexyl	1	3	3	3	Good	-0.225746	In	27	0.20561	0.697869
1055	MCPA-isoctyl	1	3	3	3	Good	-0.225746	In	27	0.20561	0.697869
329	Chlorfluren	1	3	3	3	Good	-0.226233	In	11	0.0484682	0.637372
331	Chlorflurenol	1	3	3	3	Good	-0.226233	In	11	0.0484682	0.637372
830	Flurenol	1	3	3	3	Good	-0.226233	In	11	0.0484682	0.637372
37	2,4-DB	1	3	3	3	Good	-0.228541	In	16	0.0684511	0.813039
136	Azinphos-methyl	1	3	3	3	Good	-0.228541	In	16	0.0684511	0.813039
693	Fenazaquin	1	3	3	3	Good	-0.228541	In	16	0.0684511	0.813039
646	Ethaboxam	1	3	3	3	Good	-0.229118	In	33	0.0451418	0.92711
41	2,5-dichlorobenzoic acid methyl ester	1	3	3	3	Good	-0.234856	In	14	0.0128362	0.935335
66	Acibenzolar-S-methyl	1	3	3	3	Good	-0.234856	In	14	0.0128362	0.935335
208	Bistrifluron	1	3	3	3	Good	-0.234856	In	14	0.0128362	0.935335
318	Chlorfenac	1	3	3	3	Good	-0.234856	In	14	0.0128362	0.935335
497	Dicamba	1	3	3	3	Good	-0.234856	In	14	0.0128362	0.935335
499	Dicamba diolamine	1	3	3	3	Good	-0.234856	In	14	0.0128362	0.935335
1084	Mephenate	1	3	3	3	Good	-0.234856	In	14	0.0128362	0.935335
1258	Phenobenzuron	1	3	3	3	Good	-0.234856	In	14	0.0128362	0.935335
1482	Swep	1	3	3	3	Good	-0.234856	In	14	0.0128362	0.935335
1588	Tricamba	1	3	3	3	Good	-0.234856	In	14	0.0128362	0.935335
144	Barban	1	3	3	3	Good	-0.236165	In	14	0.0554956	0.723363
311	Chlorbufam	1	3	3	3	Good	-0.236165	In	14	0.0554956	0.723363
232	Bromoxynil-octanoate	1	3	3	3	Good	-0.241	In	27	0.0674552	0.875757
967	Ioxynil octanoate	1	3	3	3	Good	-0.241	In	27	0.0674552	0.875757
200	Bioresmethrin	1	3	3	3	Good	-0.241398	In	27	6.96e-07	0.999999
1417	Resmethrin	1	3	3	3	Good	-0.241398	In	27	6.96e-07	0.999999
726	Fenpyrazamine	1	3	3	3	Good	-0.241793	In	16	0.0715375	0.804599
869	Furalaxyl	1	3	3	3	Good	-0.241793	In	16	0.0715375	0.804599
878	Furyloxyfen	1	3	3	3	Good	-0.241793	In	16	0.0715375	0.804599
1012	Isoxapyrifop	1	3	3	3	Good	-0.241793	In	16	0.0715375	0.804599
416	Cumyluron	1	3	3	3	Good	-0.245003	In	16	0.095322	0.796375
843	Flutolanil	1	3	3	3	Good	-0.245003	In	16	0.095322	0.796375
1087	Mepronil	1	3	3	3	Good	-0.245003	In	16	0.095322	0.796375
124	Anisuron	1	3	3	3	Good	-0.248212	In	14	0.0536592	0.733639
196	Bifenthrin	1	3	3	3	Good	-0.250108	In	33	0.0522071	0.915702
1018	Kappa-bifenthrin	1	3	3	3	Good	-0.250108	In	33	0.0522071	0.915702
547	Difenzoquat	1	3	3	3	Good	-0.251422	In	21	0.0126472	0.929688
548	Difenzoquat metilsulfate	1	3	3	3	Good	-0.251422	In	21	0.0126472	0.929688
770	Flubenzimine	1	3	3	3	Good	-0.251422	In	21	0.0126472	0.929688
860	Fosmethilan	1	3	3	3	Good	-0.252554	In	27	0.0649565	0.880271
110	Amisulbrom	1	3	3	3	Good	-0.255197	In	16	0.0986827	0.789197
1621	Tritosulfuron	1	3	3	3	Good	-0.255197	In	16	0.0986827	0.789197
15	1,2-benzisothiazolin-3-one	1	3	3	3	Good	-0.257841	In	29	0	NaN
34	2,4,5-trichlorophenol	1	3	3	3	Good	-0.257841	In	29	0	NaN
54	4-aminopyridine	1	3	3	3	Good	-0.257841	In	29	0	NaN
55	8-hydroxyquinoline	1	3	3	3	Good	-0.257841	In	29	0	NaN
72	Acrylonitrile	1	3	3	3	Good	-0.257841	In	29	0	NaN
92	Aluminium ammonium sulphate	1	3	3	3	Good	-0.257841	In	29	0	NaN
114	Amitrole	1	3	3	3	Good	-0.257841	In	29	0	NaN
116	Ammonium carbonate	1	3	3	3	Good	-0.257841	In	29	0	NaN
117	Ammonium sulphamate	1	3	3	3	Good	-0.257841	In	29	0	NaN
118	Ammonium sulphate	1	3	3	3	Good	-0.257841	In	29	0	NaN
119	Ammonium thiocyanate	1	3	3	3	Good	-0.257841	In	29	0	NaN
145	Barium carbonate	1	3	3	3	Good	-0.257841	In	29	0	NaN
153	Benclothiaz	1	3	3	3	Good	-0.257841	In	29	0	NaN
230	Bromoxynil	1	3	3	3	Good	-0.257841	In	29	0	NaN
266	Calcium carbide	1	3	3	3	Good	-0.257841	In	29	0	NaN
267	Calcium carbonate	1	3	3	3	Good	-0.257841	In	29	0	NaN
268	Calcium cyanamide	1	3	3	3	Good	-0.257841	In	29	0	NaN
269	Calcium phosphate	1	3	3	3	Good	-0.257841	In	29	0	NaN
282	Carbon dioxide	1	3	3	3	Good	-0.257841	In	29	0	NaN
283	Carbon disulphide	1	3	3	3	Good	-0.257841	In	29	0	NaN
302	Chloranil	1	3	3	3	Good	-0.257841	In	29	0	NaN
336	Chlorine dioxide	1	3	3	3	Good	-0.257841	In	29	0	NaN
347	Chlorothalonil	1	3	3	3	Good	-0.257841	In	29	0	NaN
352	Chloroxynil	1	3	3	3	Good	-0.257841	In	29	0	NaN
360	Chlorquinox	1	3	3	3	Good	-0.257841	In	29	0	NaN
403	Copper II carbonate	1	3	3	3	Good	-0.257841	In	29	0	NaN
405	Copper oxychloride	1	3	3	3	Good	-0.257841	In	29	0	NaN
406	Copper sulphate	1	3	3	3	Good	-0.257841	In	29	0	NaN
417	Cyanamide	1	3	3	3	Good	-0.257841	In	29	0	NaN
493	Diammonium phosphate	1	3	3	3	Good	-0.257841	In	29	0	NaN
501	Dichlobenil	1	3	3	3	Good	-0.257841	In	29	0	NaN
505	Dichlone	1	3	3	3	Good	-0.257841	In	29	0	NaN
530	Dicopper carbonate dihydroxide	1	3	3	3	Good	-0.257841	In	29	0	NaN
598	Dipotassium phosphonate	1	3	3	3	Good	-0.257841	In	29	0	NaN
604	Disodium phosphonate	1	3	3	3	Good	-0.257841	In	29	0	NaN
610	Dithianon	1	3	3	3	Good	-0.257841	In	29	0	NaN
745	Ferric phosphate	1	3	3	3	Good	-0.257841	In	29	0	NaN
854	Formaldehyde	1	3	3	3	Good	-0.257841	In	29	0	NaN
896	Gypsum	1	3	3	3	Good	-0.257841	In	29	0	NaN
904	Haloxydine	1	3	3	3	Good	-0.257841	In	29	0	NaN
915	Hexachlorobenzene	1	3	3	3	Good	-0.257841	In	29	0	NaN
927	Hydroquinone	1	3	3	3	Good	-0.257841	In	29	0	NaN
966	Ioxynil	1	3	3	3	Good	-0.257841	In	29	0	NaN
1032	Limestone	1	3	3	3	Good	-0.257841	In	29	0	NaN
1039	Maleic hydrazide	1	3	3	3	Good	-0.257841	In	29	0	NaN
1178	Nanosilver-silica composite	1	3	3	3	Good	-0.257841	In	29	0	NaN
1179	Naphthalene	1	3	3	3	Good	-0.257841	In	29	0	NaN
1227	Oxine-copper	1	3	3	3	Good	-0.257841	In	29	0	NaN
1248	Pentachlorophenol	1	3	3	3	Good	-0.257841	In	29	0	NaN
1270	Phosphane	1	3	3	3	Good	-0.257841	In	29	0	NaN
1406	Quinoclamine	1	3	3	3	Good	-0.257841	In	29	0	NaN
1435	Silica	1	3	3	3	Good	-0.257841	In	29	0	NaN
1446	Sodium hexafluorosilicate	1	3	3	3	Good	-0.257841	In	29	0	NaN
1453	Sodium silver thiosulphate	1	3	3	3	Good	-0.257841	In	29	0	NaN
1454	Sodium tetraborate pentahydrate	1	3	3	3	Good	-0.257841	In	29	0	NaN
1477	Sulfuryl fluoride	1	3	3	3	Good	-0.257841	In	29	0	NaN
1479	Sulphuric acid	1	3	3	3	Good	-0.257841	In	29	0	NaN
1543	Thioquinox	1	3	3	3	Good	-0.257841	In	29	0	NaN
1545	Thiourea	1	3	3	3	Good	-0.257841	In	29	0	NaN
1555	Titanium dioxide	1	3	3	3	Good	-0.257841	In	29	0	NaN
1625	Urea sulphate	1	3	3	3	Good	-0.257841	In	29	0	NaN
567	Dimethomorph	1	3	3	3	Good	-0.260726	In	16	0.0761648	0.792542
800	Flumorph	1	3	3	3	Good	-0.260726	In	16	0.0761648	0.792542
197	Binapacryl	1	3	3	3	Good	-0.26188	In	27	0.00696085	0.98962
729	Fenquinotrione	1	3	3	3	Good	-0.263075	In	16	0.101279	0.783649
44	2-allyphenol	1	3	3	3	Good	-0.266147	In	21	0.00796307	0.954545
149	Benazolin	1	3	3	3	Good	-0.266147	In	21	0.00796307	0.954545
279	Carbendazim	1	3	3	3	Good	-0.266147	In	21	0.00796307	0.954545
1560	Toluene 2,4-diisocyanate	1	3	3	3	Good	-0.266147	In	21	0.00796307	0.954545
140	Azoluron	1	3	3	3	Good	-0.2703	In	14	0.0508776	0.753255
574	Dimidazon	1	3	3	3	Good	-0.2703	In	14	0.0508776	0.753255
837	Flurtamone	1	3	3	3	Good	-0.2703	In	14	0.0508776	0.753255
970	Ipfencarbazone	1	3	3	3	Good	-0.2703	In	14	0.0508776	0.753255
100	Amidoflumet	1	3	3	3	Good	-0.274453	In	16	0.10503	0.775637
399	Cloxyfonac	1	3	3	3	Good	-0.274453	In	16	0.10503	0.775637
901	Halofenozide	1	3	3	3	Good	-0.274453	In	16	0.10503	0.775637
1110	Methasulfocarb	1	3	3	3	Good	-0.274453	In	16	0.10503	0.775637
831	Flurenol-butyl	1	3	3	3	Good	-0.278606	In	16	0.0807348	0.781155
832	Fluridone	1	3	3	3	Good	-0.279322	In	21	0.00377198	0.977941
768	Flubendiamide	1	3	3	3	Good	-0.281471	In	27	0.0136197	0.979691
1016	Kadethrin	1	3	3	3	Good	-0.281471	In	27	0.0136197	0.979691
592	Diofenolan	1	3	3	3	Good	-0.282759	In	33	0.0631975	0.897956
784	Flufenerim	1	3	3	3	Good	-0.282759	In	33	0.0631975	0.897956
1296	Pretilachlor	1	3	3	3	Good	-0.282759	In	33	0.0631975	0.897956
1339	Prosulfuron	1	3	3	3	Good	-0.282759	In	33	0.0631975	0.897956
1392	Pyriofenone	1	3	3	3	Good	-0.282759	In	33	0.0631975	0.897956
1607	Triflumizole	1	3	3	3	Good	-0.282759	In	33	0.0631975	0.897956
708	Fenoprop-butometyl	1	3	3	3	Good	-0.283726	In	27	0.193021	0.71248
1600	Trifenmorph	1	3	3	3	Good	-0.285337	In	16	0.108618	0.767972
179	Benzobicyclon	1	3	3	3	Good	-0.289985	In	16	0.0837292	0.773909
957	Indoxacarb	1	3	3	3	Good	-0.289985	In	16	0.0837292	0.773909
1267	Phosmet	1	3	3	3	Good	-0.289985	In	16	0.0837292	0.773909
303	Chloranocryl	1	3	3	3	Good	-0.29118	In	21	0	1
618	Drazoxolon	1	3	3	3	Good	-0.29118	In	21	0	1
695	Fenchlorazole	1	3	3	3	Good	-0.29118	In	21	0	1
1103	Metazoxolon	1	3	3	3	Good	-0.29118	In	21	0	1
789	Flufenpyr	1	3	3	3	Good	-0.292334	In	14	0.108712	0.574263
385	Clofencet	1	3	3	3	Good	-0.299184	In	14	0.0485605	0.780546
825	Flupyrimin	1	3	3	3	Good	-0.299184	In	14	0.0485605	0.780546
842	Flutianil	1	3	3	3	Good	-0.300803	In	14	0.107463	0.578788
731	Fenridazon-propyl	1	3	3	3	Good	-0.303639	In	16	0.0873995	0.765213
484	Denatonium benzoate	1	3	3	3	Good	-0.304793	In	27	0.0215469	0.967871
1622	Tyclopyrazoflor	1	3	3	3	Good	-0.306711	In	27	0.0554936	0.902067
176	Benzamorf	1	3	3	3	Good	-0.307678	In	27	0.322585	0.597107
543	Difenoconazole	1	3	3	3	Good	-0.311544	In	16	0.0895592	0.760179
413	Credazine	1	3	3	3	Good	-0.311661	In	11	0.00542441	0.966201
1401	Quinacetol sulphate	1	3	3	3	Good	-0.311661	In	11	0.00542441	0.966201
175	Benzamacril isobutyl	1	3	3	3	Good	-0.318203	In	27	0.0261051	0.961074
449	Cypendazole	1	3	3	3	Good	-0.318203	In	27	0.0261051	0.961074
1605	Trifluenfuronate	1	3	3	3	Good	-0.318203	In	27	0.0261051	0.961074
1043	Mandestrobin	1	3	3	3	Good	-0.322285	In	33	0.0765017	0.876473
1145	Metrafenone	1	3	3	3	Good	-0.322285	In	33	0.0765017	0.876473
802	Fluopicolide	1	3	3	3	Good	-0.323942	In	14	0.0479142	0.805549
834	Fluroxypyr	1	3	3	3	Good	-0.323942	In	14	0.0479142	0.805549
1592	Triclopyr	1	3	3	3	Good	-0.323942	In	14	0.0479142	0.805549
204	Bismerthiazol	1	3	3	3	Good	-0.324519	In	14	0.104257	0.591843
363	Chlorthal-dimethyl	1	3	3	3	Good	-0.324519	In	14	0.104257	0.591843
570	Dimethyl phthalate	1	3	3	3	Good	-0.324519	In	14	0.104257	0.591843
803	Fluopimomide	1	3	3	3	Good	-0.324519	In	14	0.104257	0.591843
1226	Oxazosulfyl	1	3	3	3	Good	-0.324519	In	14	0.104257	0.591843
1421	Saisentong	1	3	3	3	Good	-0.324519	In	14	0.104257	0.591843
676	Ethylenediamine tetraacetic acid	1	3	3	3	Good	-0.328557	In	27	0.251142	0.656818
1445	Sodium ferric EDTA	1	3	3	3	Good	-0.328557	In	27	0.251142	0.656818
26	1-naphthylacetamide	1	3	3	3	Good	-0.328729	In	11	2.39e-06	0.999985
27	1-naphthylacetic acid	1	3	3	3	Good	-0.328729	In	11	2.39e-06	0.999985
277	Carbaryl	1	3	3	3	Good	-0.328729	In	11	2.39e-06	0.999985
701	Fenfuram	1	3	3	3	Good	-0.328729	In	11	2.39e-06	0.999985
730	Fenridazon	1	3	3	3	Good	-0.328729	In	11	2.39e-06	0.999985
790	Flufenpyr-ethyl	1	3	3	3	Good	-0.329696	In	33	0.0789963	0.872445
1593	Triclopyr-butotyl	1	3	3	3	Good	-0.337884	In	27	0.182403	0.726692
134	Azimsulfuron	1	3	3	3	Good	-0.340527	In	33	0.0826421	0.866558
3	(R)-flufiprole	1	3	3	3	Good	-0.341188	In	16	0.0978515	0.7413
12	1,1-bis(4-chlorophenyl)-2-ethoxyethanol	1	3	3	3	Good	-0.341188	In	16	0.0978515	0.7413
605	Disul	1	3	3	3	Good	-0.341188	In	16	0.0978515	0.7413
608	Disul-sodium	1	3	3	3	Good	-0.341188	In	16	0.0978515	0.7413
791	Flufiprole	1	3	3	3	Good	-0.341188	In	16	0.0978515	0.7413
846	Fluxametamide	1	3	3	3	Good	-0.341188	In	16	0.0978515	0.7413
53	4,4-methylenedianiline	1	3	3	3	Good	-0.343171	In	11	0.00458548	0.970429
507	Dichlorophen	1	3	3	3	Good	-0.343171	In	11	0.00458548	0.970429
916	Hexachlorophene	1	3	3	3	Good	-0.343171	In	11	0.00458548	0.970429
1564	Tralocythrin	1	3	3	3	Good	-0.343805	In	27	0.034807	0.948098
1565	Tralomethrin	1	3	3	3	Good	-0.343805	In	27	0.034807	0.948098
42	2,6-dichloro-N-((4-(trifluoromethyl)phenyl)methyl-benzamide	1	3	3	3	Good	-0.345398	In	14	0.048401	0.777771
350	Chloroxuron	1	3	3	3	Good	-0.345398	In	14	0.048401	0.777771
797	Flumiclorac-pentyl	1	3	3	3	Good	-0.34886	In	27	0.114303	0.813756
509	Dichlorprop-butotyl	1	3	3	3	Good	-0.349437	In	27	0.1803	0.729797
709	Fenoprop-butotyl	1	3	3	3	Good	-0.349437	In	27	0.1803	0.729797
1048	MCPA-butotyl	1	3	3	3	Good	-0.349437	In	27	0.1803	0.729797
391	Clomeprop	1	3	3	3	Good	-0.35268	In	14	0.101057	0.608132
546	Difenoxuron	1	3	3	3	Good	-0.35268	In	14	0.101057	0.608132
894	Guadipyr	1	3	3	3	Good	-0.353647	In	27	0.05138	0.921849
214	Brodifacoum	1	3	3	3	Good	-0.355088	In	14	0.0489341	0.765227
542	Difenacoum	1	3	3	3	Good	-0.355088	In	14	0.0489341	0.765227
549	Difethialone	1	3	3	3	Good	-0.355088	In	14	0.0489341	0.765227
1062	Mebenil	1	3	3	3	Good	-0.35555	In	11	0.00851794	0.945069
147	Benalaxyl	1	3	3	3	Good	-0.357858	In	33	0.0884755	0.857139
148	Benalaxyl-M	1	3	3	3	Good	-0.357858	In	33	0.0884755	0.857139
202	Bipyrazone	1	3	3	3	Good	-0.357858	In	33	0.0884755	0.857139
209	Bitertanol	1	3	3	3	Good	-0.357858	In	33	0.0884755	0.857139
971	Ipfentrifluconazole	1	3	3	3	Good	-0.357858	In	33	0.0884755	0.857139
1	(4-chlorophenoxy)acetic acid	1	3	3	3	Good	-0.364173	In	14	0.0496039	0.753466
35	2,4,5-trichlorophenoxyacetic acid	1	3	3	3	Good	-0.364173	In	14	0.0496039	0.753466
36	2,4-D	1	3	3	3	Good	-0.364173	In	14	0.0496039	0.753466
38	2,4-D-dimethylammonium	1	3	3	3	Good	-0.364173	In	14	0.0496039	0.753466
127	Asulam	1	3	3	3	Good	-0.364173	In	14	0.0496039	0.753466
1009	Isoxadifen	1	3	3	3	Good	-0.364173	In	14	0.0496039	0.753466
1626	Valifenalate	1	3	3	3	Good	-0.365247	In	27	0.177523	0.73409
692	Fenazaflor	1	3	3	3	Good	-0.366278	In	11	0.0119261	0.923091
696	Fenchlorazole-ethyl	1	3	3	3	Good	-0.366278	In	11	0.0119261	0.923091
1224	Oxasulfuron	1	3	3	3	Good	-0.37111	In	33	0.0929363	0.849937
229	Bromopropylate	1	3	3	3	Good	-0.37432	In	16	0.107414	0.720201
346	Chloropropylate	1	3	3	3	Good	-0.37432	In	16	0.107414	0.720201
408	Coumafuryl	1	3	3	3	Good	-0.377529	In	14	0.0988263	0.623268
635	Epoxiconazole	1	3	3	3	Good	-0.377529	In	14	0.0988263	0.623268
685	Fenamidone	1	3	3	3	Good	-0.377529	In	14	0.0988263	0.623268
1259	Phenothrin	1	3	3	3	Good	-0.379425	In	27	0.0469141	0.930045
1481	Sumithrin	1	3	3	3	Good	-0.379425	In	27	0.0469141	0.930045
1377	Pyridachlometyl	1	3	3	3	Good	-0.383948	In	11	0.0175395	0.886891
752	Flazasulfuron	1	3	3	3	Good	-0.384514	In	16	0.110407	0.713709
18	1,3-butadiene	1	3	3	3	Good	-0.387158	In	29	0.0454986	0
32	2,3,5-tri-iodobenzoic acid	1	3	3	3	Good	-0.387158	In	29	0.0454986	0
33	2,3,6-TBA	1	3	3	3	Good	-0.387158	In	29	0.0454986	0
52	2-phenylphenol	1	3	3	3	Good	-0.387158	In	29	0.0454986	0
65	Acibenzolar	1	3	3	3	Good	-0.387158	In	29	0.0454986	0
71	Acrolein	1	3	3	3	Good	-0.387158	In	29	0.0454986	0
91	Alpha-naphthylthiourea	1	3	3	3	Good	-0.387158	In	29	0.0454986	0
106	Aminopyralid	1	3	3	3	Good	-0.387158	In	29	0.0454986	0
107	Aminopyralid-dimethylammonium	1	3	3	3	Good	-0.387158	In	29	0.0454986	0
182	Benzoic acid	1	3	3	3	Good	-0.387158	In	29	0.0454986	0
201	Biphenyl	1	3	3	3	Good	-0.387158	In	29	0.0454986	0
233	Brompyrazon	1	3	3	3	Good	-0.387158	In	29	0.0454986	0
299	Chloramben	1	3	3	3	Good	-0.387158	In	29	0.0454986	0
300	Chloramben-ammonium	1	3	3	3	Good	-0.387158	In	29	0.0454986	0
320	Chlorfenazole	1	3	3	3	Good	-0.387158	In	29	0.0454986	0
333	Chloridazon	1	3	3	3	Good	-0.387158	In	29	0.0454986	0
365	Chlorthiamid	1	3	3	3	Good	-0.387158	In	29	0.0454986	0
394	Clopyralid	1	3	3	3	Good	-0.387158	In	29	0.0454986	0
526	Dicloran	1	3	3	3	Good	-0.387158	In	29	0.0454986	0
649	Ethanedial	1	3	3	3	Good	-0.387158	In	29	0.0454986	0
698	Fenclorim	1	3	3	3	Good	-0.387158	In	29	0.0454986	0
720	Fenpiclonil	1	3	3	3	Good	-0.387158	In	29	0.0454986	0
810	Fluoroimide	1	3	3	3	Good	-0.387158	In	29	0.0454986	0
864	Fuberidazole	1	3	3	3	Good	-0.387158	In	29	0.0454986	0
875	Furfural	1	3	3	3	Good	-0.387158	In	29	0.0454986	0
1274	Picloram	1	3	3	3	Good	-0.387158	In	29	0.0454986	0
1379	Pyridafol	1	3	3	3	Good	-0.387158	In	29	0.0454986	0
1403	Quinclorac	1	3	3	3	Good	-0.387158	In	29	0.0454986	0
1412	Quintozene	1	3	3	3	Good	-0.387158	In	29	0.0454986	0
1451	Sodium o-nitrophenolate	1	3	3	3	Good	-0.387158	In	29	0.0454986	0
1452	Sodium p-nitrophenolate	1	3	3	3	Good	-0.387158	In	29	0.0454986	0
1455	Sodium tetrathiocarbonate	1	3	3	3	Good	-0.387158	In	29	0.0454986	0
1494	Tecnazene	1	3	3	3	Good	-0.387158	In	29	0.0454986	0
1521	Thiabendazole	1	3	3	3	Good	-0.387158	In	29	0.0454986	0
1584	Triazoxide	1	3	3	3	Good	-0.387158	In	29	0.0454986	0
1399	Pyroxsulam	1	3	3	3	Good	-0.390042	In	33	0.099309	0.839647
1574	Triafamone	1	3	3	3	Good	-0.390042	In	33	0.099309	0.839647
1580	Triasulfuron	1	3	3	3	Good	-0.390042	In	33	0.099309	0.839647
30	2-(thiocyanomethylthio)benzothiazole	1	3	3	3	Good	-0.395464	In	21	0.0484375	0.75
211	Bixafen	1	3	3	3	Good	-0.395464	In	21	0.0484375	0.75
364	Chlorthal-monomethyl	1	3	3	3	Good	-0.395464	In	21	0.0484375	0.75
847	Fluxapyroxad	1	3	3	3	Good	-0.395464	In	21	0.0484375	0.75
1282	Piperonyl butoxide	1	3	3	3	Good	-0.397469	In	27	0.371766	0.564685
531	Dicoumarol	1	3	3	3	Good	-0.397898	In	11	0.0219711	0.858313
174	Benzamacril	1	3	3	3	Good	-0.399617	In	14	0.097344	0.637369
361	Chlorsulfuron	1	3	3	3	Good	-0.399617	In	14	0.097344	0.637369
829	Flurazole	1	3	3	3	Good	-0.399617	In	14	0.097344	0.637369
965	Iofensulfuron	1	3	3	3	Good	-0.399617	In	14	0.097344	0.637369
925	Hydramethylnon	1	3	3	3	Good	-0.402916	In	33	0.103642	0.83265
1010	Isoxadifen ethyl	1	3	3	3	Good	-0.40377	In	16	0.116116	0.701446
1079	Mefentrifluconazole	1	3	3	3	Good	-0.40377	In	16	0.116116	0.701446
146	Beflubutamid	1	3	3	3	Good	-0.407923	In	33	0.105328	0.829929
527	Dicloromezotiaz	1	3	3	3	Good	-0.408639	In	21	0.0479271	0.764368
453	Cyphenothrin	1	3	3	3	Good	-0.412076	In	27	0.0580122	0.913496
1332	Propoxycarbazone	1	3	3	3	Good	-0.412076	In	27	0.0580122	0.913496
1356	Pyraflufen-ethyl	1	3	3	3	Good	-0.412076	In	27	0.0580122	0.913496
238	Bucarpolate	1	3	3	3	Good	-0.413043	In	27	0.235586	0.675825
583	Dinocton	1	3	3	3	Good	-0.413043	In	27	0.235586	0.675825
588	Dinosulfon	1	3	3	3	Good	-0.413043	In	27	0.235586	0.675825
407	Coumachlor	1	3	3	3	Good	-0.41938	In	14	0.0964358	0.650538
769	Flubeneteram	1	3	3	3	Good	-0.41938	In	14	0.0964358	0.650538
1632	Warfarin	1	3	3	3	Good	-0.41938	In	14	0.0964358	0.650538
396	Cloquintocet-mexyl	1	3	3	3	Good	-0.420382	In	27	0.105631	0.83849
448	Cyometrinil	1	3	3	3	Good	-0.420496	In	21	0.0477784	0.777778
1299	Probenazole	1	3	3	3	Good	-0.420496	In	21	0.0477784	0.777778
1606	Triflumezopyrim	1	3	3	3	Good	-0.420496	In	21	0.0477784	0.777778
1142	Metosulam	1	3	3	3	Good	-0.42165	In	16	0.121474	0.690059
1585	Tribenuron	1	3	3	3	Good	-0.42165	In	16	0.121474	0.690059
496	Dibutyl phthalate	1	3	3	3	Good	-0.424535	In	27	0.168234	0.750649
1387	Pyrimidifen	1	3	3	3	Good	-0.424535	In	27	0.168234	0.750649
703	Fenitropan	1	3	3	3	Good	-0.425857	In	27	0.0543829	0.903291
766	Fluazinam	1	3	3	3	Good	-0.428501	In	14	0.0961532	0.656801
1188	Nicosulfuron	1	3	3	3	Good	-0.432956	In	33	0.113754	0.816323
1586	Tribenuron-methyl	1	3	3	3	Good	-0.432956	In	33	0.113754	0.816323
575	Dimoxystrobin	1	3	3	3	Good	-0.440861	In	33	0.116414	0.812027
748	Flamprop-isopropyl	1	3	3	3	Good	-0.440861	In	33	0.116414	0.812027
750	Flamprop-M-isopropyl	1	3	3	3	Good	-0.440861	In	33	0.116414	0.812027
502	Dichlobentiazox	1	3	3	3	Good	-0.440978	In	11	0.0480211	0.74478
1390	Pyrimisulfan	1	3	3	3	Good	-0.44752	In	27	0.0573386	0.893088
220	Bromethalin	1	3	3	3	Good	-0.453258	In	14	0.0958285	0.674414
899	Halauxifen-methyl	1	3	3	3	Good	-0.453258	In	14	0.0958285	0.674414
1252	Perfluidone	1	3	3	3	Good	-0.453258	In	14	0.0958285	0.674414
1383	Pyrifenox	1	3	3	3	Good	-0.453258	In	14	0.0958285	0.674414
1472	Sulfometuron	1	3	3	3	Good	-0.453258	In	14	0.0958285	0.674414
215	Broflanilide	1	3	3	3	Good	-0.453835	In	16	0.131234	0.669562
278	Carbasulam	1	3	3	3	Good	-0.453835	In	16	0.131234	0.669562
762	Fluazifop	1	3	3	3	Good	-0.453835	In	16	0.131234	0.669562
764	Fluazifop-P	1	3	3	3	Good	-0.453835	In	16	0.131234	0.669562
905	Haloxyfop	1	3	3	3	Good	-0.453835	In	16	0.131234	0.669562
907	Haloxyfop-P	1	3	3	3	Good	-0.453835	In	16	0.131234	0.669562
1234	Oxyfluorfen	1	3	3	3	Good	-0.453835	In	16	0.131234	0.669562
1473	Sulfometuron-methyl	1	3	3	3	Good	-0.453835	In	16	0.131234	0.669562
251	Buthiobate	1	3	3	3	Good	-0.456143	In	27	0.103187	0.85143
471	Debacarb	1	3	3	3	Good	-0.456143	In	27	0.103187	0.85143
51	2-naphthyloxyacetic acid	1	3	3	3	Good	-0.458046	In	11	0.0477138	0.764694
794	Flumetsulam	1	3	3	3	Good	-0.458046	In	11	0.0477138	0.764694
86	Allyxycarb	1	3	3	3	Good	-0.459012	In	27	0.0739657	0.889707
1247	Penoxsulam	1	3	3	3	Good	-0.459012	In	27	0.0739657	0.889707
1335	Propyrisulfuron	1	3	3	3	Good	-0.459012	In	27	0.0739657	0.889707
1610	Triflusulfuron	1	3	3	3	Good	-0.459012	In	27	0.0739657	0.889707
1548	Tiafenacil	1	3	3	3	Good	-0.462342	In	27	0.0598007	0.886107
903	Halosulfuron-methyl	1	3	3	3	Good	-0.469844	In	27	0.0776473	0.884217
793	Flumetralin	1	3	3	3	Good	-0.470505	In	33	0.126393	0.795915
908	Haloxyfop-P-methyl	1	3	3	3	Good	-0.470505	In	33	0.126393	0.795915
1368	Pyrazosulfuron	1	3	3	3	Good	-0.470505	In	33	0.126393	0.795915
1533	Thifensulfuron-methyl	1	3	3	3	Good	-0.470505	In	33	0.126393	0.795915
308	Chlorbenside	1	3	3	3	Good	-0.472488	In	11	0.0479336	0.74209
757	Florpyrauxifen	1	3	3	3	Good	-0.472488	In	11	0.0479336	0.74209
805	Fluorbenside	1	3	3	3	Good	-0.472488	In	11	0.0479336	0.74209
898	Halauxifen	1	3	3	3	Good	-0.472488	In	11	0.0479336	0.74209
445	Cyhalothrin	1	3	3	3	Good	-0.477379	In	27	0.0802084	0.880398
879	Gamma-cyhalothrin	1	3	3	3	Good	-0.477379	In	27	0.0802084	0.880398
1026	Lambda-cyhalothrin	1	3	3	3	Good	-0.477379	In	27	0.0802084	0.880398
340	Chlorobenzilate	1	3	3	3	Good	-0.481997	In	16	0.139875	0.651627
781	Fluenetil	1	3	3	3	Good	-0.481997	In	16	0.139875	0.651627
1418	Rimisoxafen	1	3	3	3	Good	-0.484866	In	11	0.0484682	0.722698
1369	Pyrazosulfuron-ethyl	1	3	3	3	Good	-0.487751	In	27	0.0647198	0.87414
4	(R)-flutriafol	1	3	3	3	Good	-0.49349	In	14	0.0966844	0.63081
6	(S)-flutriafol	1	3	3	3	Good	-0.49349	In	14	0.0966844	0.63081
185	Benzoylprop	1	3	3	3	Good	-0.49349	In	14	0.0966844	0.63081
747	Flamprop	1	3	3	3	Good	-0.49349	In	14	0.0966844	0.63081
761	Fluazaindolizine	1	3	3	3	Good	-0.49349	In	14	0.0966844	0.63081
838	Flusilazole	1	3	3	3	Good	-0.49349	In	14	0.0966844	0.63081
844	Flutriafol	1	3	3	3	Good	-0.49349	In	14	0.0966844	0.63081
919	Hexaflumuron	1	3	3	3	Good	-0.49349	In	14	0.0966844	0.63081
1076	Mefenacet	1	3	3	3	Good	-0.49349	In	14	0.0966844	0.63081
753	Flocoumafen	1	3	3	3	Good	-0.494798	In	16	0.14383	0.643475
1532	Thifensulfuron	1	3	3	3	Good	-0.494798	In	16	0.14383	0.643475
1246	Penfluron	1	3	3	3	Good	-0.495595	In	11	0.0491817	0.705891
1608	Triflumuron	1	3	3	3	Good	-0.495595	In	11	0.0491817	0.705891
1611	Triflusulfuron-methyl	1	3	3	3	Good	-0.497217	In	27	0.0667457	0.869681
426	Cyclaniliprole	1	3	3	3	Good	-0.497326	In	33	0.13542	0.781338
521	Diclobutrazol	1	3	3	3	Good	-0.499633	In	27	0.159374	0.772726
194	Bifenazate	1	3	3	3	Good	-0.503636	In	16	0.13745	0.657326
785	Flufenoxadiazam	1	3	3	3	Good	-0.504982	In	11	0.0499886	0.691185
749	Flamprop-methyl	1	3	3	3	Good	-0.506846	In	14	0.145758	0.541764
751	Flamprop-M-methyl	1	3	3	3	Good	-0.506846	In	14	0.145758	0.541764
1036	Lufenuron	1	3	3	3	Good	-0.506846	In	14	0.145758	0.541764
1205	Noviflumuron	1	3	3	3	Good	-0.506846	In	14	0.145758	0.541764
1357	Pyrafluprole	1	3	3	3	Good	-0.506846	In	14	0.145758	0.541764
1156	Modoflaner	1	3	3	3	Good	-0.512608	In	14	0.145465	0.544495
690	Fenarimol	1	3	3	3	Good	-0.513265	In	11	0.0508354	0.678209
1206	Nuarimol	1	3	3	3	Good	-0.513265	In	11	0.0508354	0.678209
1579	Triarimol	1	3	3	3	Good	-0.513265	In	11	0.0508354	0.678209
8	1-(4-chlorophenyl)-3-(2,6-dichlorobenzoyl)urea	1	3	3	3	Good	-0.516474	In	11	0.0596399	0.615394
20	1,3-dinitrobenzene	1	3	3	3	Good	-0.516474	In	11	0.0596399	0.615394
122	Anilazine	1	3	3	3	Good	-0.516474	In	11	0.0596399	0.615394
139	Azobenzene	1	3	3	3	Good	-0.516474	In	11	0.0596399	0.615394
142	Azoxybenzene	1	3	3	3	Good	-0.516474	In	11	0.0596399	0.615394
158	Benodanil	1	3	3	3	Good	-0.516474	In	11	0.0596399	0.615394
170	Bentonite	1	3	3	3	Good	-0.516474	In	11	0.0596399	0.615394
210	Bithionol	1	3	3	3	Good	-0.516474	In	11	0.0596399	0.615394
362	Chlorthal	1	3	3	3	Good	-0.516474	In	11	0.0596399	0.615394
386	Clofentezine	1	3	3	3	Good	-0.516474	In	11	0.0596399	0.615394
401	Copper bis(3-phenylsalicylate)	1	3	3	3	Good	-0.516474	In	11	0.0596399	0.615394
550	Diflovidazin	1	3	3	3	Good	-0.516474	In	11	0.0596399	0.615394
551	Diflubenzuron	1	3	3	3	Good	-0.516474	In	11	0.0596399	0.615394
597	Diphenylamine	1	3	3	3	Good	-0.516474	In	11	0.0596399	0.615394
828	Fluquinconazole	1	3	3	3	Good	-0.516474	In	11	0.0596399	0.615394
853	Forchlorfenuron	1	3	3	3	Good	-0.516474	In	11	0.0596399	0.615394
866	Fumaric acid	1	3	3	3	Good	-0.516474	In	11	0.0596399	0.615394
955	Indolauxipyr	1	3	3	3	Good	-0.516474	In	11	0.0596399	0.615394
1004	Isotianil	1	3	3	3	Good	-0.516474	In	11	0.0596399	0.615394
1031	Lime sulphur	1	3	3	3	Good	-0.516474	In	11	0.0596399	0.615394
1404	Quinconazole	1	3	3	3	Good	-0.516474	In	11	0.0596399	0.615394
1410	Quinoxyfen	1	3	3	3	Good	-0.516474	In	11	0.0596399	0.615394
1495	Teflubenzuron	1	3	3	3	Good	-0.516474	In	11	0.0596399	0.615394
1518	Tetrasul	1	3	3	3	Good	-0.516474	In	11	0.0596399	0.615394
1529	Thidiazuron	1	3	3	3	Good	-0.516474	In	11	0.0596399	0.615394
1553	Tioxazafen	1	3	3	3	Good	-0.516474	In	11	0.0596399	0.615394
199	Biopermethrin	1	3	3	3	Good	-0.519359	In	27	0.0944774	0.859121
377	Cis-permethrin	1	3	3	3	Good	-0.519359	In	27	0.0944774	0.859121
457	Cyproflanilide	1	3	3	3	Good	-0.519359	In	27	0.0944774	0.859121
722	Fenpirithrin	1	3	3	3	Good	-0.519359	In	27	0.0944774	0.859121
1253	Permethrin	1	3	3	3	Good	-0.519359	In	27	0.0944774	0.859121
1419	Rimsulfuron	1	3	3	3	Good	-0.519359	In	27	0.0944774	0.859121
1569	Transpermethrin	1	3	3	3	Good	-0.519359	In	27	0.0944774	0.859121
1603	Trifloxysulfuron	1	3	3	3	Good	-0.519359	In	27	0.0944774	0.859121
1239	Parinol	1	3	3	3	Good	-0.520627	In	11	0.051689	0.666675
1365	Pyraziflumid	1	3	3	3	Good	-0.520627	In	11	0.051689	0.666675
180	Benzofenap	1	3	3	3	Good	-0.521708	In	16	0.141646	0.646822
171	Benzadox	1	3	3	3	Good	-0.52478	In	21	0.0958881	0.617647
172	Benzadox ammonium	1	3	3	3	Good	-0.52478	In	21	0.0958881	0.617647
304	Chlorantraniliprole	1	3	3	3	Good	-0.52478	In	21	0.0958881	0.617647
666	Ethoxylated p-nonylphenol	1	3	3	3	Good	-0.526786	In	13	0.384201	0.669257
186	Benzoylprop-ethyl	1	3	3	3	Good	-0.533087	In	16	0.144352	0.640209
460	Cyprosulfamide	1	3	3	3	Good	-0.533087	In	16	0.144352	0.640209
1373	Pyribencarb	1	3	3	3	Good	-0.53724	In	27	0.100555	0.850059
422	Cyantraniliprole	1	3	3	3	Good	-0.537956	In	21	0.0956313	0.627358
1180	Naproanilide	1	3	3	3	Good	-0.537956	In	21	0.0956313	0.627358
89	Alpha-cypermethrin	1	3	3	3	Good	-0.548618	In	27	0.104422	0.844292
189	Beta-cyfluthrin	1	3	3	3	Good	-0.548618	In	27	0.104422	0.844292
190	Beta-cypermethrin	1	3	3	3	Good	-0.548618	In	27	0.104422	0.844292
441	Cyfluthrin	1	3	3	3	Good	-0.548618	In	27	0.104422	0.844292
450	Cypermethrin	1	3	3	3	Good	-0.548618	In	27	0.104422	0.844292
476	Deltamethrin	1	3	3	3	Good	-0.548618	In	27	0.104422	0.844292
754	Flometoquin	1	3	3	3	Good	-0.548618	In	27	0.104422	0.844292
1520	Theta-cypermethrin	1	3	3	3	Good	-0.548618	In	27	0.104422	0.844292
1638	Zeta-cypermethrin	1	3	3	3	Good	-0.548618	In	27	0.104422	0.844292
1150	Metyltetraprole	1	3	3	3	Good	-0.548696	In	14	0.144148	0.562251
1366	Pyrazolynate	1	3	3	3	Good	-0.548696	In	14	0.144148	0.562251
1552	Tiorantraniliprole	1	3	3	3	Good	-0.548696	In	14	0.144148	0.562251
826	Flupyrsulfuron	1	3	3	3	Good	-0.550967	In	16	0.148696	0.629816
931	Imazalil	1	3	3	3	Good	-0.550967	In	16	0.148696	0.629816
932	Imazalil nitrate	1	3	3	3	Good	-0.550967	In	16	0.148696	0.629816
933	Imazalil sulfate	1	3	3	3	Good	-0.550967	In	16	0.148696	0.629816
1149	Metsulfuron-methyl	1	3	3	3	Good	-0.550967	In	16	0.148696	0.629816
582	Dinocap	1	3	3	3	Good	-0.553852	In	27	0.215746	0.710073
1088	Meptyldinocap	1	3	3	3	Good	-0.553852	In	27	0.215746	0.710073
528	Diclosulam	1	3	3	3	Good	-0.557817	In	14	0.143959	0.566923
963	Iodosulfuron	1	3	3	3	Good	-0.557817	In	14	0.143959	0.566923
1148	Metsulfuron	1	3	3	3	Good	-0.557817	In	14	0.143959	0.566923
1396	Pyrithiobac-sodium	1	3	3	3	Good	-0.557817	In	14	0.143959	0.566923
173	Benzalkonium chloride	1	3	3	3	Good	-0.558005	In	27	0.278811	0.64605
694	Fenbuconazole	1	3	3	3	Good	-0.559437	In	16	0.15079	0.624893
1441	Sintofen	1	3	3	3	Good	-0.559437	In	16	0.15079	0.624893
1200	Norbormide	1	3	3	3	Good	-0.563069	In	14	0.143877	0.569649
1256	Phenisopham	1	3	3	3	Good	-0.570177	In	27	0.11175	0.833365
1612	Trifopsime	1	3	3	3	Good	-0.570177	In	27	0.11175	0.833365
814	Fluotrimazole	1	3	3	3	Good	-0.570295	In	11	0.0955816	0.605923
1619	Tripyrasulfone	1	3	3	3	Good	-0.571432	In	27	0.0852088	0.834727
440	Cyflumetofen	1	3	3	3	Good	-0.576837	In	27	0.105387	0.834085
342	Chlorophacinone	1	3	3	3	Good	-0.579199	In	11	0.0954629	0.612695
595	Diphacinone	1	3	3	3	Good	-0.579199	In	11	0.0954629	0.612695
389	Clofop-isobutyl	1	3	3	3	Good	-0.580918	In	27	0.0878116	0.83026
305	Chlorazifop	1	3	3	3	Good	-0.582575	In	14	0.143743	0.579997
382	Clodinafop	1	3	3	3	Good	-0.582575	In	14	0.143743	0.579997
944	Imazosulfuron	1	3	3	3	Good	-0.582575	In	14	0.143743	0.579997
1163	Monosulfuron-methyl	1	3	3	3	Good	-0.582575	In	14	0.143743	0.579997
1594	Triclopyricarb	1	3	3	3	Good	-0.583152	In	16	0.15677	0.611108
756	Florasulam	1	3	3	3	Good	-0.587362	In	11	0.0954276	0.619038
1162	Monosulfuron	1	3	3	3	Good	-0.587362	In	11	0.0954276	0.619038
763	Fluazifop-butyl	1	3	3	3	Good	-0.591659	In	27	0.106747	0.827565
765	Fluazifop-P-butyl	1	3	3	3	Good	-0.591659	In	27	0.106747	0.827565
1215	Orthosulfamuron	1	3	3	3	Good	-0.599821	In	27	0.121826	0.81834
1474	Sulfosulfuron	1	3	3	3	Good	-0.599821	In	27	0.121826	0.81834
296	Chlomethoxyfen	1	3	3	3	Good	-0.601804	In	11	0.0955377	0.600738
808	Fluorodifen	1	3	3	3	Good	-0.601804	In	11	0.0955377	0.600738
839	Flusulfamide	1	3	3	3	Good	-0.601804	In	11	0.0955377	0.600738
68	Acifluorfen-methyl	1	3	3	3	Good	-0.604032	In	14	0.143906	0.559997
388	Clofop	1	3	3	3	Good	-0.604032	In	14	0.143906	0.559997
523	Diclofop	1	3	3	3	Good	-0.604032	In	14	0.143906	0.559997
850	Fomesafen	1	3	3	3	Good	-0.604032	In	14	0.143906	0.559997
524	Diclofop-methyl	1	3	3	3	Good	-0.611314	In	16	0.164072	0.594739
902	Halosafen	1	3	3	3	Good	-0.611314	In	16	0.164072	0.594739
67	Acifluorfen	1	3	3	3	Good	-0.614183	In	11	0.095807	0.58504
188	Benzyl benzoate	1	3	3	3	Good	-0.614183	In	11	0.095807	0.58504
244	Butafenacil	1	3	3	3	Good	-0.616491	In	27	0.0979021	0.813506
439	Cyflufenamid	1	3	3	3	Good	-0.616491	In	27	0.0979021	0.813506
1273	Picarbutrazox	1	3	3	3	Good	-0.616491	In	27	0.0979021	0.813506
443	Cyhalofop	1	3	3	3	Good	-0.622806	In	14	0.144315	0.542497
716	Fenoxaprop-P	1	3	3	3	Good	-0.622806	In	14	0.144315	0.542497
734	Fenthiaprop	1	3	3	3	Good	-0.622806	In	14	0.144315	0.542497
1104	Metcamifen	1	3	3	3	Good	-0.622806	In	14	0.144315	0.542497
1141	Metominostrobin	1	3	3	3	Good	-0.622806	In	14	0.144315	0.542497
1517	Tetraniliprole	1	3	3	3	Good	-0.624115	In	16	0.167456	0.587299
553	Diflufenzopyr	1	3	3	3	Good	-0.624911	In	11	0.0961699	0.571434
1359	Pyrametostrobin	1	3	3	3	Good	-0.626642	In	27	0.130943	0.804746
434	Cyclosulfamuron	1	3	3	3	Good	-0.629744	In	27	0.101773	0.807264
1388	Pyriminobac-methyl	1	3	3	3	Good	-0.629744	In	27	0.101773	0.807264
852	Foramsulfuron	1	3	3	3	Good	-0.632953	In	27	0.133088	0.801548
760	Fluacrypyrim	1	3	3	3	Good	-0.63316	In	27	0.11168	0.80931
956	Indolauxipyr-cyanomethyl	1	3	3	3	Good	-0.634299	In	11	0.0965851	0.559529
664	Ethoxyfen	1	3	3	3	Good	-0.636163	In	16	0.170675	0.580296
735	Fenthiaprop ethyl	1	3	3	3	Good	-0.636163	In	16	0.170675	0.580296
1204	Novaluron	1	3	3	3	Good	-0.636163	In	16	0.170675	0.580296
776	Fluchlordiniliprole	1	3	3	3	Good	-0.642582	In	11	0.0970261	0.549025
69	Aclonifen	1	3	3	3	Good	-0.645791	In	11	0.0763775	0.470594
213	Boscalid	1	3	3	3	Good	-0.645791	In	11	0.0763775	0.470594
324	Chlorfenson	1	3	3	3	Good	-0.645791	In	11	0.0763775	0.470594
325	Chlorfensulphide	1	3	3	3	Good	-0.645791	In	11	0.0763775	0.470594
339	Chlornitrofen	1	3	3	3	Good	-0.645791	In	11	0.0763775	0.470594
602	Dipyrithione	1	3	3	3	Good	-0.645791	In	11	0.0763775	0.470594
732	Fenson	1	3	3	3	Good	-0.645791	In	11	0.0763775	0.470594
812	Fluoronitrofen	1	3	3	3	Good	-0.645791	In	11	0.0763775	0.470594
897	Halacrinate	1	3	3	3	Good	-0.645791	In	11	0.0763775	0.470594
1183	Naptalam	1	3	3	3	Good	-0.645791	In	11	0.0763775	0.470594
1186	Niclosamide	1	3	3	3	Good	-0.645791	In	11	0.0763775	0.470594
1194	Nitrofen	1	3	3	3	Good	-0.645791	In	11	0.0763775	0.470594
1223	Oxapyrazon	1	3	3	3	Good	-0.645791	In	11	0.0763775	0.470594
1478	Sulphaquinoxaline	1	3	3	3	Good	-0.645791	In	11	0.0763775	0.470594
1493	Tecloftalam	1	3	3	3	Good	-0.645791	In	11	0.0763775	0.470594
1524	Thiapronil	1	3	3	3	Good	-0.645791	In	11	0.0763775	0.470594
1578	Triarathene	1	3	3	3	Good	-0.645791	In	11	0.0763775	0.470594
552	Diflufenican	1	3	3	3	Good	-0.656532	In	11	0.0979242	0.531333
951	Inabenfide	1	3	3	3	Good	-0.656532	In	11	0.0979242	0.531333
1277	Picolinafen	1	3	3	3	Good	-0.656532	In	11	0.0979242	0.531333
544	Difenopenten	1	3	3	3	Good	-0.65825	In	16	0.176656	0.567458
1345	Protrifenbute	1	3	3	3	Good	-0.66155	In	27	0.111257	0.792284
715	Fenoxaprop-ethyl	1	3	3	3	Good	-0.662403	In	27	0.143098	0.786621
717	Fenoxaprop-P-ethyl	1	3	3	3	Good	-0.662403	In	27	0.143098	0.786621
1024	Kresoxim-methyl	1	3	3	3	Good	-0.662403	In	27	0.143098	0.786621
1278	Picoxystrobin	1	3	3	3	Good	-0.662403	In	27	0.143098	0.786621
328	Chlorfluazuron	1	3	3	3	Good	-0.66246	In	11	0.0983639	0.523815
786	Flufenoxuron	1	3	3	3	Good	-0.667825	In	11	0.098791	0.517012
374	Cinosulfuron	1	3	3	3	Good	-0.670709	In	27	0.117432	0.792794
410	Coumethoxystrobin	1	3	3	3	Good	-0.673287	In	27	0.146797	0.781105
1216	Orysastrobin	1	3	3	3	Good	-0.674863	In	27	0.153933	0.795306
1241	Pefurazoate	1	3	3	3	Good	-0.674863	In	27	0.153933	0.795306
964	Iodosulfuron-methyl-sodium	1	3	3	3	Good	-0.680284	In	27	0.149175	0.777559
787	Flufenoxystrobin	1	3	3	3	Good	-0.688754	In	27	0.152054	0.773266
819	Flupoxam	1	3	3	3	Good	-0.688754	In	27	0.152054	0.773266
1414	Quizalofop-ethyl	1	3	3	3	Good	-0.688754	In	27	0.152054	0.773266
648	Ethametsulfuron-methyl	1	3	3	3	Good	-0.691589	In	27	0.12042	0.778136
668	Ethoxysulfuron	1	3	3	3	Good	-0.691589	In	27	0.12042	0.778136
827	Flupyrsulfuron-methyl-sodium	1	3	3	3	Good	-0.691589	In	27	0.12042	0.778136
1370	Pyrazoxyfen	1	3	3	3	Good	-0.695799	In	16	0.187035	0.545632
665	Ethoxyfen-ethyl	1	3	3	3	Good	-0.699494	In	27	0.122859	0.774413
684	Famoxadone	1	3	3	3	Good	-0.699611	In	11	0.143244	0.510706
960	Iodobonil	1	3	3	3	Good	-0.699611	In	11	0.143244	0.510706
177	Benzfendizone	1	3	3	3	Good	-0.700749	In	27	0.122798	0.77958
397	Cloransulam	1	3	3	3	Good	-0.711892	In	16	0.191556	0.536279
1297	Primisulfuron	1	3	3	3	Good	-0.711892	In	16	0.191556	0.536279
162	Bensulfuron	1	3	3	3	Good	-0.712469	In	27	0.160115	0.761246
335	Chlorimuron-ethyl	1	3	3	3	Good	-0.712469	In	27	0.160115	0.761246
1298	Primisulfuron methyl	1	3	3	3	Good	-0.712469	In	27	0.160115	0.761246
58	Acequinocyl	1	3	3	3	Good	-0.718613	In	27	0.322694	0.621839
906	Haloxyfop-etotyl	1	3	3	3	Good	-0.720975	In	27	0.156288	0.776279
163	Bensulfuron-methyl	1	3	3	3	Good	-0.729138	In	27	0.132091	0.760451
545	Difenopenten-ethyl	1	3	3	3	Good	-0.729138	In	27	0.132091	0.760451
900	Halfenprox	1	3	3	3	Good	-0.729138	In	27	0.132091	0.760451
1602	Trifloxystrobin	1	3	3	3	Good	-0.729138	In	27	0.132091	0.760451
870	Furalaxyl-M	1	3	3	3	Good	-0.729799	In	27	0.166005	0.752463
334	Chlorimuron	1	3	3	3	Good	-0.731121	In	11	0.143215	0.504619
1381	Pyridate	1	3	3	3	Good	-0.731716	In	27	0.204411	0.758634
1382	Pyridinitril	1	3	3	3	Good	-0.731716	In	27	0.204411	0.758634
727	Fenpyrazone	1	3	3	3	Good	-0.731755	In	27	0.157059	0.771832
1098	Metamifop	1	3	3	3	Good	-0.739879	In	14	0.191865	0.485886
1100	Metarylpicoxamid	1	3	3	3	Good	-0.741597	In	27	0.204288	0.761528
195	Bifenox	1	3	3	3	Good	-0.7435	In	11	0.143395	0.491433
444	Cyhalofop-butyl	1	3	3	3	Good	-0.745808	In	27	0.131922	0.75976
77	Alanycarb	1	3	3	3	Good	-0.749432	In	27	0.259565	0.689253
485	Desmedipham	1	3	3	3	Good	-0.752123	In	21	0.191952	0.444444
1093	Metaflumizone	1	3	3	3	Good	-0.752123	In	21	0.191952	0.444444
638	Epyrifenacil	1	3	3	3	Good	-0.755959	In	27	0.140543	0.747819
165	Bensultap	1	3	3	3	Good	-0.75906	In	27	0.13482	0.753931
719	Fenoxycarb	1	3	3	3	Good	-0.76227	In	27	0.142543	0.744847
728	Fenpyroximate	1	3	3	3	Good	-0.764582	In	27	0.136053	0.751502
306	Chlorazifop propargyl	1	3	3	3	Good	-0.765479	In	27	0.178133	0.734379
383	Clodinafop propargyl	1	3	3	3	Good	-0.765479	In	27	0.178133	0.734379
691	Fenasulam	1	3	3	3	Good	-0.765479	In	27	0.178133	0.734379
945	Imibenconazole	1	3	3	3	Good	-0.768689	In	21	0.191532	0.450758
70	Acrinathrin	1	3	3	3	Good	-0.771142	In	27	0.160558	0.75558
161	Benquinox	1	3	3	3	Good	-0.775108	In	11	0.112532	0.380956
680	Etofenprox	1	3	3	3	Good	-0.790867	In	27	0.142116	0.739941
1433	Silafluofen	1	3	3	3	Good	-0.790867	In	27	0.142116	0.739941
184	Benzoximate	1	3	3	3	Good	-0.79172	In	27	0.151932	0.730976
1380	Pyridalyl	1	3	3	3	Good	-0.795873	In	27	0.143305	0.737738
778	Flucycloxuron	1	3	3	3	Good	-0.802587	In	27	0.190746	0.715572
772	Flucetosulfuron	1	3	3	3	Good	-0.804179	In	27	0.20479	0.748895
1355	Pyraclostrobin	1	3	3	3	Good	-0.80733	In	27	0.192358	0.713168
108	Aminopyrofen	1	3	3	3	Good	-0.808447	In	21	0.191114	0.466667
219	Bromadiolone	1	3	3	3	Good	-0.808447	In	21	0.191114	0.466667
758	Florpyrauxifen-benzyl	1	3	3	3	Good	-0.808447	In	21	0.191114	0.466667
1394	Pyriproxyfen	1	3	3	3	Good	-0.825116	In	27	0.198403	0.704153
1025	Lactofen	1	3	3	3	Good	-0.828811	In	27	0.151371	0.72325
816	Fluoxastrobin	1	3	3	3	Good	-0.841208	In	27	0.203873	0.695997
640	Esfenvalerate	1	3	3	3	Good	-0.841785	In	27	0.168057	0.707396
742	Fenvalerate	1	3	3	3	Good	-0.841785	In	27	0.168057	0.707396
721	Fenpicoxamid	1	3	3	3	Good	-0.848823	In	27	0.311615	0.64845
2	(E)-2-(2-(2-(2,3-dichlorophenylamino)-6-trifluoromethylpyrimidin-4-yloxymethyl)phenyl)-3-methoxyacrylate	1	3	3	3	Good	-0.855838	In	27	0.208846	0.688582
412	Coumoxystrobin	1	3	3	3	Good	-0.857794	In	27	0.171713	0.719827
788	Flufenprox	1	3	3	3	Good	-0.858455	In	27	0.158955	0.710211
1090	Mesosulfuron	1	3	3	3	Good	-0.858455	In	27	0.158955	0.710211
687	Fenaminstrobin	1	3	3	3	Good	-0.863242	In	27	0.175019	0.697291
1559	Tolpyralate	1	3	3	3	Good	-0.866127	In	27	0.310588	0.652159
817	Fluoxytioconazole	1	3	3	3	Good	-0.869195	In	27	0.213386	0.681812
809	Fluoroglycofen	1	3	3	3	Good	-0.88144	In	27	0.217548	0.675606
1361	Pyraoxystrobin	1	3	3	3	Good	-0.882748	In	27	0.181371	0.688104
1091	Mesosulfuron-methyl	1	3	3	3	Good	-0.888377	In	27	0.176657	0.707209
1318	Propamidine	1	3	3	3	Good	-0.894796	In	27	0.185304	0.682429
216	Brofluthrinate	1	3	3	3	Good	-0.901781	In	27	0.170504	0.691153
432	Cycloprothrin	1	3	3	3	Good	-0.901781	In	27	0.170504	0.691153
779	Flucythrinate	1	3	3	3	Good	-0.901781	In	27	0.170504	0.691153
845	Fluvalinate	1	3	3	3	Good	-0.901781	In	27	0.170504	0.691153
1483	Tau-fluvalinate	1	3	3	3	Good	-0.901781	In	27	0.170504	0.691153
225	Bromofenoxim	1	3	3	3	Good	-0.904424	In	11	0.155069	0.320003
867	Fuphenthiourea	1	3	3	3	Good	-0.904424	In	11	0.155069	0.320003
1466	Sulcofuron	1	3	3	3	Good	-0.904424	In	11	0.155069	0.320003
1467	Sulcofuron-sodium	1	3	3	3	Good	-0.904424	In	11	0.155069	0.320003
1447	Sodium lignosulfonate	1	3	3	3	Good	-0.908463	In	27	0.255352	0.716793
1448	Sodium metabisulphite	1	3	3	3	Good	-0.908463	In	27	0.255352	0.716793
1322	Propaquizafop	1	3	3	3	Good	-0.936568	In	27	0.185365	0.687325
205	Bispyribac	1	3	3	3	Good	-0.947387	In	27	0.183154	0.671093
1126	Methyl (((1-(5-(2-chloro-4-(trifluoromethyl)phenoxy)-2-nitrophenyl)-2-methoxyethylidene)amino)oxy)acetate	1	3	3	3	Good	-0.958128	In	27	0.18959	0.678429
1044	Mandipropamid	1	3	3	3	Good	-0.963283	In	27	0.190628	0.676302
1371	Pyribambenz-isopropyl	1	3	3	3	Good	-0.963283	In	27	0.190628	0.676302
629	Enoxastrobin	1	3	3	3	Good	-1.01206	In	27	0.201778	0.642643
584	Dinofenate	1	3	3	3	Good	-1.0209	In	27	0.2029	0.652527
1389	Pyriminostrobin	1	3	3	3	Good	-1.02987	In	27	0.207021	0.634809
1017	Kaolin	1	3	3	3	Good	-1.03374	In	11	0.199957	0.275864
143	Azoxystrobin	1	3	3	3	Good	-1.08756	In	27	0.248944	0.59164
1372	Pyribambenz-propyl	1	3	3	3	Good	-1.0926	In	27	0.233629	0.636836
759	Florylpicoxamid	1	3	3	3	Good	-1.09623	In	27	0.234231	0.635426
271	Cambendichlor	1	2	3	2	Moderate	-1.41905	In	27	0.335367	0.546684
1374	Pyribenzoxim	1	2	3	2	Moderate	-1.65734	In	27	0.375701	0.463777
1485	Silafluofen	1	3	3	3	Good	-0.794416	In	28	0.142116	0.739941
195	Benzoximate	1	3	3	3	Good	-0.794588	In	28	0.151932	0.730976
1432	Pyridalyl	1	3	3	3	Good	-0.799422	In	28	0.143305	0.737738
810	Flucycloxuron	1	3	3	3	Good	-0.804772	In	28	0.190746	0.715572
804	Flucetosulfuron	1	3	3	3	Good	-0.80909	In	28	0.20479	0.748895
1407	Pyraclostrobin	1	3	3	3	Good	-0.809514	In	28	0.192358	0.713168
114	Aminopyrofen	1	3	3	3	Good	-0.809949	In	22	0.191114	0.466667
232	Bromadiolone	1	3	3	3	Good	-0.809949	In	22	0.191114	0.466667
789	Florpyrauxifen-benzyl	1	3	3	3	Good	-0.809949	In	22	0.191114	0.466667
1446	Pyriproxyfen	1	3	3	3	Good	-0.827298	In	28	0.198403	0.704153
1064	Lactofen	1	3	3	3	Good	-0.832355	In	28	0.151371	0.72325
848	Fluoxastrobin	1	3	3	3	Good	-0.843388	In	28	0.203873	0.695997
666	Esfenvalerate	1	3	3	3	Good	-0.844646	In	28	0.168057	0.707396
773	Fenvalerate	1	3	3	3	Good	-0.844646	In	28	0.168057	0.707396
749	Fenpicoxamid	1	3	3	3	Good	-0.85509	In	28	0.311615	0.64845
2	(E)-2-(2-(2-(2,3-dichlorophenylamino)-6-trifluoromethylpyrimidin-4-yloxymethyl)phenyl)-3-methoxyacrylate	1	3	3	3	Good	-0.858015	In	28	0.208846	0.688582
820	Flufenprox	1	3	3	3	Good	-0.861995	In	28	0.158955	0.710211
1134	Mesosulfuron	1	3	3	3	Good	-0.861995	In	28	0.158955	0.710211
435	Coumoxystrobin	1	3	3	3	Good	-0.862015	In	28	0.171713	0.719827
713	Fenaminstrobin	1	3	3	3	Good	-0.8661	In	28	0.175019	0.697291
849	Fluoxytioconazole	1	3	3	3	Good	-0.871371	In	28	0.213386	0.681812
1612	Tolpyralate	1	3	3	3	Good	-0.872391	In	28	0.310588	0.652159
841	Fluoroglycofen	1	3	3	3	Good	-0.883613	In	28	0.217548	0.675606
1413	Pyraoxystrobin	1	3	3	3	Good	-0.885603	In	28	0.181371	0.688104
1135	Mesosulfuron-methyl	1	3	3	3	Good	-0.892594	In	28	0.176657	0.707209
1370	Propamidine	1	3	3	3	Good	-0.897649	In	28	0.185304	0.682429
238	Bromofenoxim	1	3	3	3	Good	-0.905232	In	12	0.155069	0.320003
901	Fuphenthiourea	1	3	3	3	Good	-0.905232	In	12	0.155069	0.320003
1518	Sulcofuron	1	3	3	3	Good	-0.905232	In	12	0.155069	0.320003
1519	Sulcofuron-sodium	1	3	3	3	Good	-0.905232	In	12	0.155069	0.320003
229	Brofluthrinate	1	3	3	3	Good	-0.905314	In	28	0.170504	0.691153
455	Cycloprothrin	1	3	3	3	Good	-0.905314	In	28	0.170504	0.691153
811	Flucythrinate	1	3	3	3	Good	-0.905314	In	28	0.170504	0.691153
878	Fluvalinate	1	3	3	3	Good	-0.905314	In	28	0.170504	0.691153
1535	Tau-fluvalinate	1	3	3	3	Good	-0.905314	In	28	0.170504	0.691153
1499	Sodium lignosulfonate	1	3	3	3	Good	-0.91404	In	28	0.255352	0.716793
1500	Sodium metabisulphite	1	3	3	3	Good	-0.91404	In	28	0.255352	0.716793
1374	Propaquizafop	1	3	3	3	Good	-0.940778	In	28	0.185365	0.687325
217	Bispyribac	1	3	3	3	Good	-0.950913	In	28	0.183154	0.671093
218	Bispyribac-sodium	1	3	3	3	Good	-0.950913	In	28	0.183154	0.671093
1170	Methyl (((1-(5-(2-chloro-4-(trifluoromethyl)phenoxy)-2-nitrophenyl)-2-methoxyethylidene)amino)oxy)acetate	1	3	3	3	Good	-0.962334	In	28	0.18959	0.678429
1088	Mandipropamid	1	3	3	3	Good	-0.967489	In	28	0.190628	0.676302
1423	Pyribambenz-isopropyl	1	3	3	3	Good	-0.967489	In	28	0.190628	0.676302
655	Enoxastrobin	1	3	3	3	Good	-1.01558	In	28	0.201778	0.642643
608	Dinofenate	1	3	3	3	Good	-1.0251	In	28	0.2029	0.652527
1441	Pyriminostrobin	1	3	3	3	Good	-1.03339	In	28	0.207021	0.634809
1056	Kaolin	1	3	3	3	Good	-1.03521	In	12	0.199957	0.275864
153	Azoxystrobin	1	3	3	3	Good	-1.09039	In	28	0.248944	0.59164
1424	Pyribambenz-propyl	1	3	3	3	Good	-1.09747	In	28	0.233629	0.636836
790	Florylpicoxamid	1	3	3	3	Good	-1.10109	In	28	0.234231	0.635426
287	Cambendichlor	1	2	3	2	Moderate	-1.42523	In	28	0.335367	0.546684
1426	Pyribenzoxim	1	2	3	2	Moderate	-1.66349	In	28	0.375701	0.463777

## Sheet: PRI Result of model M4
No.	Chemical name	Score(MAE-LOO)	Score(Proximity Train YObs Mean)	Score(Similarity based AD)	CompositeScore	PredictionQuality	YPred(Test)	AD status	Closest Training Compound	Euclidean Distance	Generalized Jaccard Coeff.
240	Buminafos	1	2	2	2	Moderate	3.27472	In	3	0.443102	0.563303
1475	Sulfotep	1	2	2	2	Moderate	3.14054	In	3	0.439025	0.607905
1513	Tetradifon	1	2	2	2	Moderate	3.08238	In	3	0.439093	0.609791
1514	Tetraethyl pyrophosphate	1	2	2	2	Moderate	3.08238	In	3	0.439093	0.609791
1089	Merphos	1	2	3	3	Good	2.92407	In	31	0.450409	0.357592
1587	Tribufos	1	2	3	3	Good	2.88894	In	31	0.448427	0.373951
946	Imicyafos	1	2	3	3	Good	2.77488	In	31	0.446371	0.412449
262	Cadusafos	1	3	3	3	Good	2.43949	In	1	0.246406	0.400701
663	Ethoprophos	1	3	3	3	Good	2.4213	In	1	0.242931	0.418564
922	Hexylthiofos	1	3	3	3	Good	2.39959	In	1	0.23922	0.439883
1085	Mephosfolan	1	3	3	3	Good	2.33138	In	1	0.230882	0.50686
1266	Phosfolan	1	3	3	3	Good	2.3094	In	1	0.229333	0.528441
911	Heptenophos	1	3	3	3	Good	2.24419	In	1	0.228158	0.565193
1108	Methacrifos	1	3	3	3	Good	2.23149	In	1	0.22853	0.558346
1321	Propaphos	1	3	2	2	Moderate	2.19657	In	3	0.129822	0.865657
892	Glyphosine	1	3	3	3	Good	2.04499	In	5	0.230261	0.591188
1505	Terbufos	1	3	3	3	Good	2.00861	In	1	0.0834585	0.729455
1261	Phorate	1	3	3	3	Good	1.98539	In	1	0.0712239	0.769116
862	Fosthiazate	1	3	3	3	Good	1.93771	In	1	0.0461122	0.85052
1325	Propetamphos	1	3	3	3	Good	1.9238	In	1	0.0387807	0.874286
986	Isofenphos	1	3	3	3	Good	1.92207	In	31	0.215372	0.739109
1340	Prothidathion	1	3	3	3	Good	1.88477	In	1	0.0182228	0.940928
863	Fosthietan	1	3	3	3	Good	1.87039	In	1	0.0106452	0.965492
987	Isofenphos-methyl	1	3	3	3	Good	1.86939	In	31	0.212259	0.750492
1269	Phosphamidon	1	3	3	3	Good	1.8572	In	1	0.00369648	0.988017
532	Dicrotophos	1	3	3	3	Good	1.8502	In	1	8.75e-06	0.999972
245	Butamifos	1	3	3	3	Good	1.84668	In	31	0.213364	0.742758
128	Athidathion	1	3	3	3	Good	1.84114	In	1	0.00476067	0.984802
889	Glyphosate-isopropylamine	1	3	3	3	Good	1.83611	In	1	0.00741006	0.976543
881	Glufosinate	1	3	3	3	Good	1.8302	In	1	0.0105238	0.967011
1270	Phosphane	1	3	3	3	Good	1.8234	In	18	0.151755	-2.7759
1160	Monocrotophos	1	3	3	3	Good	1.82078	In	1	0.0154866	0.952197
882	Glufosinate-ammonium	1	3	3	3	Good	1.81303	In	1	0.0195685	0.940349
1037	Lythidathion	1	3	3	3	Good	1.81278	In	1	0.0196999	0.939973
1119	Methocrotophos	1	3	3	3	Good	1.80971	In	1	0.021318	0.935361
888	Glyphosate-dimethylammonium	1	3	3	3	Good	1.80519	In	1	0.0237002	0.928653
1151	Mevinphos	1	3	3	3	Good	1.77987	In	1	0.0370386	0.892804
1113	Methidathion	1	3	3	3	Good	1.77812	In	1	0.037959	0.890432
1480	Sulprofos	1	3	3	3	Good	1.77386	In	3	0.20252	0.722331
254	Butonate	1	3	3	3	Good	1.74604	In	5	0.0212848	0.944466
1285	Piperophos	1	3	3	3	Good	1.73586	In	34	0.388985	0.465236
678	Ethylmercury bromide	1	3	3	3	Good	1.72486	In	18	0.104395	-1.59751
1499	Temephos	1	3	2	2	Moderate	1.72376	In	3	6.26e-06	0.999994
1294	Polybutene	1	3	3	3	Good	1.71297	In	18	0.0986828	-1.45538
535	Didecyldimethylammonium chloride	1	3	3	3	Good	1.70565	In	18	0.0951645	-1.36784
293	Cetrimide	1	3	3	3	Good	1.70369	In	18	0.0942221	-1.3444
487	Di-1-p-menthene	1	3	3	3	Good	1.70318	In	18	0.0939787	-1.33834
1571	Triacontanol	1	3	3	3	Good	1.69788	In	18	0.0914292	-1.2749
1286	Piproctanyl	1	3	3	3	Good	1.69747	In	18	0.091233	-1.27002
18	1,3-butadiene	1	3	3	3	Good	1.69633	In	18	0.0906859	-1.25641
24	1-methylcyclopropene	1	3	3	3	Good	1.69633	In	18	0.0906859	-1.25641
247	Butanethiol	1	3	3	3	Good	1.69113	In	18	0.0881852	-1.19419
1343	Prothiofos	1	3	3	3	Good	1.68882	In	3	0.198126	0.750599
886	Glyodin	1	3	3	3	Good	1.68723	In	18	0.08631	-1.14753
962	Iodomethane	1	3	3	3	Good	1.68698	In	18	0.0861929	-1.14462
1086	Mepiquat	1	3	3	3	Good	1.68438	In	18	0.0849425	-1.1135
534	Dicyclopentadiene	1	3	3	3	Good	1.68272	In	18	0.0841431	-1.09361
1424	Seboctylamine	1	3	3	3	Good	1.68147	In	18	0.0835462	-1.07876
369	Cholecalciferol	1	3	3	3	Good	1.67961	In	18	0.0826496	-1.05645
264	Calciferol	1	3	3	3	Good	1.67779	In	18	0.0817738	-1.03466
650	Ethanethiol	1	3	3	3	Good	1.67657	In	18	0.0811868	-1.02006
45	2-aminobutane	1	3	3	3	Good	1.67528	In	18	0.0805714	-1.00474
1597	Tridemorph	1	3	3	3	Good	1.67398	In	18	0.0799445	-0.989145
79	Aldimorph	1	3	3	3	Good	1.67193	In	18	0.0789582	-0.964606
982	Isocarbophos	1	3	3	3	Good	1.67149	In	3	0.197868	0.756361
23	1-decanol	1	3	3	3	Good	1.67044	In	18	0.078241	-0.94676
1601	Trifenofos	1	3	3	3	Good	1.66906	In	3	0.208652	0.733973
1304	Profenofos	1	3	3	3	Good	1.66851	In	3	0.197845	0.757351
616	Dodemorph	1	3	3	3	Good	1.66741	In	18	0.076787	-0.910583
260	Butyl stearate	1	3	3	3	Good	1.66679	In	18	0.0764902	-0.903198
1130	Methyl nonyl ketone	1	3	3	3	Good	1.66679	In	18	0.0764902	-0.903198
1014	Izopamfos	1	3	3	3	Good	1.66321	In	18	0.0747698	-0.860391
617	Dodine	1	3	3	3	Good	1.66168	In	18	0.0740327	-0.842051
887	Glyphosate	1	3	3	3	Good	1.66116	In	5	0.0232602	0.942784
890	Glyphosate-monoammonium	1	3	3	3	Good	1.66116	In	5	0.0232602	0.942784
431	Cycloprate	1	3	3	3	Good	1.65786	In	18	0.0721984	-0.79641
644	Etaphos	1	3	3	3	Good	1.65621	In	3	0.197822	0.759349
998	Isopropyl myristate	1	3	3	3	Good	1.65372	In	18	0.0702093	-0.746918
1173	N,N-dimethyl capramide	1	3	3	3	Good	1.65299	In	18	0.0698546	-0.738093
1212	Olein	1	3	3	3	Good	1.65158	In	18	0.069179	-0.721284
918	Hexadecanoic acid	1	3	3	3	Good	1.65017	In	18	0.0685009	-0.70441
1198	N-methylneodecanamide	1	3	3	3	Good	1.64799	In	18	0.0674522	-0.678319
885	Glyceryl distearate	1	3	3	3	Good	1.64616	In	18	0.0665769	-0.656538
28	1-octyl-2-pyrrolidone	1	3	3	3	Good	1.64525	In	18	0.066135	-0.645544
926	Hydroprene	1	3	3	3	Good	1.64209	In	18	0.0646209	-0.60787
1431	S-hydroprene	1	3	3	3	Good	1.64209	In	18	0.0646209	-0.60787
1464	Spiroxamine	1	3	3	3	Good	1.64019	In	18	0.0637039	-0.585055
1618	Triprene	1	3	3	3	Good	1.63812	In	18	0.0627117	-0.560368
261	Butylate	1	3	3	3	Good	1.63639	In	18	0.0618792	-0.539654
994	Isophorone	1	3	3	3	Good	1.63368	In	18	0.0605792	-0.507308
1023	Kinoprene	1	3	3	3	Good	1.63368	In	18	0.0605792	-0.507308
400	Copper abietate	1	3	3	3	Good	1.63345	In	18	0.0604686	-0.504555
569	Dimethyl disulfide	1	3	3	3	Good	1.6308	In	18	0.0591932	-0.472821
1128	Methyl isobutyl ketone	1	3	3	3	Good	1.63034	In	18	0.0589697	-0.46726
1240	Pebulate	1	3	3	3	Good	1.62963	In	18	0.0586318	-0.458854
1629	Vernolate	1	3	3	3	Good	1.62963	In	18	0.0586318	-0.458854
891	Glyphosate-trimesium	1	3	3	3	Good	1.629	In	5	0.0401401	0.905199
895	Guazatine	1	3	3	3	Good	1.62885	In	18	0.0582551	-0.449479
949	Iminoctadine triacetate	1	3	3	3	Good	1.62885	In	18	0.0582551	-0.449479
428	Cycloate	1	3	3	3	Good	1.62726	In	18	0.0574913	-0.430476
624	Empenthrin	1	3	3	3	Good	1.62662	In	18	0.0571841	-0.422832
912	Heptopargil	1	3	3	3	Good	1.62459	In	18	0.0562071	-0.398522
1028	Lavandulyl senecioate	1	3	3	3	Good	1.62421	In	18	0.0560242	-0.393971
1116	Methiotepa	1	3	3	3	Good	1.62361	In	18	0.0557358	-0.386795
1121	Methoprene	1	3	3	3	Good	1.62292	In	18	0.0554045	-0.378553
1442	S-methoprene	1	3	3	3	Good	1.62292	In	18	0.0554045	-0.378553
437	Cycluron	1	3	3	3	Good	1.62199	In	18	0.05496	-0.367493
637	EPTC	1	3	3	3	Good	1.62157	In	18	0.054756	-0.362415
246	Butan-1-ol	1	3	3	3	Good	1.61939	In	18	0.0537108	-0.33641
995	Isopolinate	1	3	3	3	Good	1.61922	In	18	0.0536296	-0.334391
993	Isonoruron	1	3	3	3	Good	1.61802	In	18	0.0530524	-0.320027
1203	Noruron	1	3	3	3	Good	1.61802	In	18	0.0530524	-0.320027
338	Chlormequat	1	3	3	3	Good	1.61757	In	18	0.0528349	-0.314615
370	Choline chloride	1	3	3	3	Good	1.61345	In	18	0.0508567	-0.265397
429	Cyclohexanone	1	3	3	3	Good	1.61083	In	18	0.0495936	-0.233967
1549	Tiaojiean	1	3	3	3	Good	1.61041	In	18	0.0493957	-0.229044
913	Heterophos	1	3	3	3	Good	1.60992	In	3	0.180924	0.769433
1157	Molinate	1	3	3	3	Good	1.60953	In	18	0.048969	-0.218426
404	Copper naphthenate	1	3	3	3	Good	1.60704	In	18	0.047775	-0.188718
662	Ethohexadiol	1	3	3	3	Good	1.60677	In	18	0.0476425	-0.185421
1536	Thiocyclam oxalate	1	3	3	3	Good	1.60039	In	18	0.0445804	-0.109231
427	Cyclethrin	1	3	3	3	Good	1.59999	In	18	0.0443862	-0.104398
655	Ethiolate	1	3	3	3	Good	1.59963	In	18	0.0442135	-0.100103
1312	Prohydrojasmon	1	3	3	3	Good	1.59836	In	18	0.0436014	-0.0848718
82	Allethrin	1	3	3	3	Good	1.59404	In	18	0.0415275	-0.0332692
198	Bioallethrin	1	3	3	3	Good	1.59404	In	18	0.0415275	-0.0332692
1422	S-bioallethrin	1	3	3	3	Good	1.59404	In	18	0.0415275	-0.0332692
1341	Prothiocarb	1	3	3	3	Good	1.59288	In	18	0.0409667	-0.0193162
1106	Metepa	1	3	3	3	Good	1.58998	In	18	0.0395759	0.0152885
43	24-epibrassinolide	1	3	3	3	Good	1.58997	In	18	0.039571	0.0154096
633	Epocholeone	1	3	3	3	Good	1.58894	In	18	0.0390744	0.0277656
1501	Terallethrin	1	3	3	3	Good	1.58701	In	18	0.038149	0.0507925
606	Disulfoton	1	3	3	3	Good	1.58629	In	18	0.0378008	0.0594561
1430	Sethoxydim	1	3	3	3	Good	1.58605	In	18	0.037688	0.0622624
1469	Sulfallate	1	3	3	3	Good	1.58558	In	18	0.0374618	0.0678895
1295	Prallethrin	1	3	3	3	Good	1.58525	In	18	0.037304	0.0718172
1300	Prochloraz	1	3	3	3	Good	1.58525	In	18	0.037304	0.0718172
565	Dimethirimol	1	3	3	3	Good	1.58422	In	18	0.036809	0.0841327
659	Ethirimol	1	3	3	3	Good	1.58422	In	18	0.036809	0.0841327
669	Ethyl butyl nitrosamine	1	3	3	3	Good	1.5778	In	18	0.0337241	0.160892
46	2-butoxyethanol	1	3	3	3	Good	1.5778	In	18	0.0337224	0.160932
49	2-methoxyethylmercury chloride	1	3	3	3	Good	1.5778	In	18	0.0337224	0.160932
921	Hexylene glycol	1	3	3	3	Good	1.5778	In	18	0.0337224	0.160932
436	Cycloxydim	1	3	3	3	Good	1.57748	In	18	0.0335664	0.164814
111	Amiton	1	3	3	3	Good	1.57467	In	18	0.0322193	0.198333
1003	Isothioate	1	3	3	3	Good	1.57362	In	18	0.0317126	0.21094
467	Dazomet	1	3	3	3	Good	1.57122	In	18	0.0305599	0.239622
1319	Propamocarb	1	3	3	3	Good	1.57119	In	18	0.0305434	0.240031
930	Icaridin	1	3	3	3	Good	1.5682	In	18	0.0291093	0.275713
1458	Spinetoram	1	3	3	3	Good	1.56706	In	18	0.02856	0.289382
275	Carbamorph	1	3	3	3	Good	1.56596	In	18	0.0280316	0.302529
992	Isomethiozin	1	3	3	3	Good	1.56015	In	18	0.0252391	0.372011
743	Ferbam	1	3	3	3	Good	1.55958	In	18	0.0249661	0.378803
1185	Nickel bis(dimethyldithiocarbamate)	1	3	3	3	Good	1.55958	In	18	0.0249661	0.378803
1546	Thiram	1	3	3	3	Good	1.55958	In	18	0.0249661	0.378803
393	Cloproxydim	1	3	3	3	Good	1.5586	In	18	0.0244931	0.390572
1539	Thiometon	1	3	3	3	Good	1.55814	In	18	0.0242715	0.396087
10	1,1,1-acetonitrile	1	3	3	3	Good	1.55701	In	18	0.0237295	0.409573
96	Amibuzin	1	3	3	3	Good	1.55701	In	18	0.0237295	0.409573
651	Ethanol	1	3	3	3	Good	1.55701	In	18	0.0237295	0.409573
1614	Triisopropanolamine	1	3	3	3	Good	1.5567	In	18	0.023582	0.413243
1197	N-methyl-2-pyrrolidone	1	3	3	3	Good	1.55636	In	18	0.023416	0.417372
615	Dodecylphenol ethoxylate	1	3	3	3	Good	1.55629	In	18	0.0233836	0.418179
85	Allyl alcohol	1	3	3	3	Good	1.55596	In	18	0.023228	0.422051
72	Acrylonitrile	1	3	3	3	Good	1.55552	In	18	0.023013	0.427399
1029	Lenacil	1	3	3	3	Good	1.55552	In	18	0.023013	0.427399
226	Bromomethane	1	3	3	3	Good	1.54975	In	18	0.0202395	0.49641
379	Clethodim	1	3	3	3	Good	1.54915	In	18	0.0199509	0.50359
411	Coumithoate	1	3	3	3	Good	1.54873	In	31	0.0862319	0.872893
266	Calcium carbide	1	3	3	3	Good	1.54657	In	18	0.0187143	0.534359
1538	Thiofanox	1	3	3	3	Good	1.54612	In	18	0.0184953	0.539808
1515	Tetramethrin	1	3	3	3	Good	1.54533	In	18	0.018117	0.54922
607	Disulfoton sulfoxide	1	3	3	3	Good	1.54384	In	18	0.0173988	0.567089
1097	Metam	1	3	3	3	Good	1.53722	In	18	0.0142212	0.646154
83	Allidochlor	1	3	3	3	Good	1.53643	In	18	0.0138395	0.655652
430	Cycloheximide	1	3	3	3	Good	1.53355	In	18	0.0124545	0.690113
1153	Mipafox	1	3	3	3	Good	1.53275	In	18	0.0120731	0.699601
490	Di-allate	1	3	3	3	Good	1.53246	In	18	0.0119322	0.703109
920	Hexazinone	1	3	3	3	Good	1.53183	In	18	0.0116308	0.710607
657	Ethiozin	1	3	3	3	Good	1.53101	In	18	0.0112347	0.720463
656	Ethion	1	3	3	3	Good	1.52908	In	18	0.0103092	0.74349
138	Azithiram	1	3	3	3	Good	1.52654	In	18	0.00908626	0.773919
482	Demeton-S-methyl	1	3	3	3	Good	1.51828	In	18	0.00511902	0.872631
1293	Polyacrylamide	1	3	3	3	Good	1.51802	In	18	0.00499116	0.875812
84	Alloxydim	1	3	3	3	Good	1.51606	In	18	0.00405081	0.899209
1500	Tepraloxydim	1	3	3	3	Good	1.51574	In	18	0.00389669	0.903044
468	DCIP	1	3	3	3	Good	1.51392	In	18	0.0030209	0.924835
255	Butopyronoxyl	1	3	3	3	Good	1.51358	In	18	0.00285636	0.928929
950	Imiprothrin	1	3	3	3	Good	1.51333	In	18	0.0027389	0.931852
1146	Metribuzin	1	3	3	3	Good	1.51151	In	18	0.00186524	0.95359
1328	Propineb	1	3	3	3	Good	1.51046	In	18	0.00135812	0.966208
1129	Methyl isothiocyanate	1	3	3	3	Good	1.50871	In	18	0.000518	0.987106
1193	Nitrilacarb	1	3	3	3	Good	1.50789	In	18	0.000122	0.996958
78	Aldicarb	1	3	3	3	Good	1.50761	In	18	9.51e-06	0.999763
253	Butocarboxim	1	3	3	3	Good	1.50761	In	18	9.51e-06	0.999763
94	Ametridione	1	3	3	3	Good	1.50695	In	18	0.00033	0.991862
981	Isocarbamid	1	3	3	3	Good	1.5065	In	18	0.000542	0.986699
97	Amicarbazone	1	3	3	3	Good	1.50502	In	18	0.00125495	0.96972
1554	Tirpate	1	3	3	3	Good	1.49869	In	18	0.0042958	0.903435
999	Isoprothiolane	1	3	3	3	Good	1.49721	In	18	0.00501063	0.889148
345	Chloroprallethrin	1	3	3	3	Good	1.49668	In	18	0.00526081	0.884253
71	Acrolein	1	3	3	3	Good	1.49591	In	18	0.0056318	0.877094
477	Demephion	1	3	3	3	Good	1.49395	In	18	0.00657645	0.859378
677	Ethylicin	1	3	3	3	Good	1.49287	In	18	0.00709457	0.849961
1233	Oxydeprofos	1	3	3	3	Good	1.49276	In	18	0.0071485	0.848993
642	Etacelasil	1	3	3	3	Good	1.49272	In	18	0.00716588	0.848681
883	Glutaraldehyde	1	3	3	3	Good	1.49254	In	18	0.00725487	0.847089
337	Chlormephos	1	3	3	3	Good	1.49233	In	18	0.00735345	0.845333
533	Dicyclonon	1	3	3	3	Good	1.49201	In	18	0.00750678	0.842616
1135	Metiram	1	3	3	3	Good	1.49153	In	18	0.00773983	0.838519
1575	Tri-allate	1	3	3	3	Good	1.48908	In	18	0.00891659	0.818425
22	1,4-dioxane	1	3	3	3	Good	1.48868	In	18	0.00910981	0.815217
1096	Metaldehyde	1	3	3	3	Good	1.48868	In	18	0.00910981	0.815217
16	1,2-dibromoethane	1	3	3	3	Good	1.48814	In	19	0.00912178	0.844573
47	2-hydrazinoethanol	1	3	3	3	Good	1.48663	In	19	0.00839632	0.856934
292	Cartap	1	3	3	3	Good	1.48529	In	19	0.00775165	0.867919
217	Bromacil	1	3	3	3	Good	1.4848	In	19	0.00751654	0.871925
218	Bromacil-dimethylammonium	1	3	3	3	Good	1.4848	In	19	0.00751654	0.871925
48	2-methoxyethanol	1	3	3	3	Good	1.48422	In	19	0.00723875	0.876658
1334	Propylene glycol	1	3	3	3	Good	1.48422	In	19	0.00723875	0.876658
463	DAEP	1	3	3	3	Good	1.48362	In	19	0.00695156	0.881552
1046	Mazidox	1	3	3	3	Good	1.48219	In	19	0.00626044	0.893328
556	Dimefox	1	3	3	3	Good	1.48126	In	19	0.00581615	0.900898
74	AD-67	1	3	3	3	Good	1.47901	In	19	0.00473439	0.91933
506	Dichlormid	1	3	3	3	Good	1.47607	In	19	0.00332068	0.943419
17	1,2-dichloropropane	1	3	3	3	Good	1.47569	In	19	0.00313898	0.946515
1555	Titanium dioxide	1	3	3	3	Good	1.47367	In	19	0.00216449	0.963119
492	Diammonium ethylenebis (dithiocarbamate)	1	3	3	3	Good	1.47249	In	19	0.0015976	0.972778
1042	Mancopper	1	3	3	3	Good	1.47249	In	19	0.0015976	0.972778
1045	Maneb	1	3	3	3	Good	1.47249	In	19	0.0015976	0.972778
1175	Nabam	1	3	3	3	Good	1.47249	In	19	0.0015976	0.972778
1639	Zineb	1	3	3	3	Good	1.47249	In	19	0.0015976	0.972778
1289	Pirimiphos-ethyl	1	3	3	3	Good	1.47022	In	31	0.0388886	0.943058
1502	Terbacil	1	3	3	3	Good	1.46977	In	19	0.000294	0.994991
1232	Oxydemeton-methyl	1	3	3	3	Good	1.46916	In	19	0	1
489	Dialifos	1	3	3	3	Good	1.46618	In	31	0.0845399	0.865114
112	Amiton oxalate	1	3	3	3	Good	1.46342	In	19	0.00276144	0.955062
1127	Methyl ether cellulose	1	3	3	3	Good	1.46026	In	19	0.00427969	0.932034
1545	Thiourea	1	3	3	3	Good	1.45887	In	19	0.00494741	0.922255
1616	Trinexapac-ethyl	1	3	3	3	Good	1.45761	In	19	0.0055537	0.913551
983	Isocil	1	3	3	3	Good	1.45628	In	19	0.00619285	0.904551
59	Acetamide	1	3	3	3	Good	1.45303	In	19	0.00775323	0.883308
1109	Methamidophos	1	3	3	3	Good	1.44885	In	19	0.00976425	0.857358
1174	N1,N2-diallyl-N2-dichloroacetylglycinamide	1	3	3	3	Good	1.44782	In	19	0.010259	0.851206
645	Etem	1	3	3	3	Good	1.44219	In	19	0.0129632	0.819081
675	Ethylene urea	1	3	3	3	Good	1.44004	In	19	0.0140005	0.807392
206	Bisthiosemi	1	3	3	3	Good	1.43817	In	19	0.0148962	0.797564
860	Fosmethilan	1	3	3	3	Good	1.43598	In	31	0.0459664	0.924815
203	Bis(2-chloroethyl)ether	1	3	3	3	Good	1.4343	In	19	0.0167593	0.777869
466	Daminozide	1	3	3	3	Good	1.43404	In	19	0.0168812	0.776614
120	Ampropylfos	1	3	3	3	Good	1.43309	In	19	0.0173388	0.77194
1199	N-nitrosodimethylamine	1	3	3	3	Good	1.43035	In	19	0.0186558	0.758795
57	Acephate	1	3	3	3	Good	1.42806	In	19	0.0197587	0.748128
670	Ethyl formate	1	3	3	3	Good	1.4275	In	19	0.0200239	0.745607
1329	Propionic acid	1	3	3	3	Good	1.4275	In	19	0.0200239	0.745607
483	Demeton-S-methyl sulfone	1	3	3	3	Good	1.42343	In	19	0.0219825	0.727504
495	Dibromochloropropane	1	3	3	3	Good	1.42325	In	19	0.0220666	0.726747
589	Dinotefuran	1	3	3	3	Good	1.42295	In	19	0.0222118	0.725443
56	ACC	1	3	3	3	Good	1.42183	In	19	0.0227492	0.720655
631	Epichlorohydrin	1	3	3	3	Good	1.41714	In	19	0.025005	0.701232
674	Ethylene glycol	1	3	3	3	Good	1.4156	In	19	0.0257471	0.695068
80	Aldoxycarb	1	3	3	3	Good	1.41013	In	19	0.028374	0.674097
256	Butoxycarboxim	1	3	3	3	Good	1.41013	In	19	0.028374	0.674097
1190	Nithiazine	1	3	3	3	Good	1.4071	In	19	0.0298333	0.662984
19	1,3-dichloropropene	1	3	3	3	Good	1.40448	In	19	0.0310931	0.653681
1311	Prohexadione	1	3	3	3	Good	1.39757	In	19	0.0344142	0.630363
688	Fenamiphos	1	3	3	3	Good	1.39683	In	31	7.57e-06	0.99999
1262	Phosacetim	1	3	2	2	Moderate	1.39531	In	3	0.0998631	0.916379
472	Decafentin	1	3	2	2	Moderate	1.39445	In	3	0.193521	0.803798
884	Glycerin	1	3	3	3	Good	1.38841	In	12	0.0349534	0.735592
13	1,1-dichloroethane	1	3	3	3	Good	1.38671	In	12	0.0341384	0.741757
673	Ethylene dichloride	1	3	3	3	Good	1.38671	In	12	0.0341384	0.741757
88	Alpha-chlorohydrin	1	3	3	3	Good	1.37744	In	12	0.0296905	0.775404
1133	Methylene bisthiocyanate	1	3	3	3	Good	1.37674	In	12	0.0293584	0.777916
564	Dimethipin	1	3	3	3	Good	1.37503	In	12	0.028536	0.784137
494	Diazinon	1	3	3	3	Good	1.37382	In	31	0.011069	0.986766
417	Cyanamide	1	3	3	3	Good	1.37194	In	12	0.0270558	0.795334
474	Dehydroacetic acid	1	3	3	3	Good	1.36568	In	12	0.0240541	0.81804
1263	Phosalone	1	3	3	3	Good	1.36484	In	31	0.071397	0.889079
447	Cymoxanil	1	3	3	3	Good	1.36075	In	12	0.0216916	0.835912
81	Aldrin	1	3	3	3	Good	1.36061	In	12	0.021625	0.836416
985	Isodrin	1	3	3	3	Good	1.36061	In	12	0.021625	0.836416
928	Hymexazol	1	3	3	3	Good	1.35945	In	12	0.0210662	0.840643
204	Bismerthiazol	1	3	3	3	Good	1.35942	In	12	0.0210564	0.840717
1456	Sorbitol	1	3	3	3	Good	1.35705	In	12	0.019917	0.849336
973	Iprobenfos	1	3	3	3	Good	1.35389	In	31	0.0226726	0.967312
170	Bentonite	1	3	3	3	Good	1.35316	In	12	0.0180509	0.863453
1265	Phosdiphen	1	3	2	2	Moderate	1.35264	In	3	0.0907717	0.901192
626	Endothal	1	3	3	3	Good	1.34995	In	12	0.0165134	0.875083
1290	Pirimiphos-methyl	1	3	3	3	Good	1.34962	In	31	0.0227136	0.973218
14	1,2,3-trichloropropane	1	3	3	3	Good	1.34949	In	12	0.016294	0.876743
354	Chlorphoxim	1	3	3	3	Good	1.33699	In	31	0.0561616	0.917638
738	Fenthion-ethyl	1	3	3	3	Good	1.33301	In	31	0.0223387	0.969233
1271	Phoxim	1	3	3	3	Good	1.3284	In	31	0.0329293	0.961635
283	Carbon disulphide	1	3	3	3	Good	1.32814	In	12	0.00605808	0.954173
1465	Strobane	1	3	3	3	Good	1.32642	In	12	0.00523308	0.960414
1625	Urea sulphate	1	3	3	3	Good	1.32437	In	12	0.00425059	0.967846
854	Formaldehyde	1	3	3	3	Good	1.32045	In	12	0.00237457	0.982037
1617	Trioxymethylene	1	3	3	3	Good	1.32045	In	12	0.00237457	0.982037
1631	Vinegar	1	3	3	3	Good	1.32045	In	12	0.00237457	0.982037
316	Chlorethoxyfos	1	3	3	3	Good	1.31622	In	12	0.000346	0.99738
536	Dieldrin	1	3	3	3	Good	1.31551	In	12	4.57e-06	0.999965
628	Endrin	1	3	3	3	Good	1.31551	In	12	4.57e-06	0.999965
858	Fosamine	1	3	3	3	Good	1.31448	In	12	0.000489	0.996318
272	Camphechlor	1	3	3	3	Good	1.31039	In	25	2.94e-06	0.999978
859	Fosetyl	1	3	3	3	Good	1.3098	In	25	0.000286	0.997881
676	Ethylenediamine tetraacetic acid	1	3	3	3	Good	1.30746	In	25	0.00140918	0.98964
109	Amiprofos-methyl	1	3	3	3	Good	1.30623	In	31	0.0435994	0.949828
1613	Triforine	1	3	3	3	Good	1.29964	In	25	0.00515483	0.96312
1544	Thiosultap	1	3	3	3	Good	1.29919	In	25	0.00537062	0.961635
976	IPSP	1	3	3	3	Good	1.29845	In	34	0.19848	0.622326
609	Ditalimfos	1	3	3	3	Good	1.29748	In	31	0.0478101	0.945248
367	Chlorthiophos	1	3	3	3	Good	1.29215	In	31	0.0503774	0.942477
221	Bromfenvinfos	1	3	3	3	Good	1.29066	In	31	0.0774363	0.894909
1455	Sodium tetrathiocarbonate	1	3	3	3	Good	1.28445	In	25	0.012436	0.915432
1039	Maleic hydrazide	1	3	3	3	Good	1.28146	In	25	0.013868	0.906603
733	Fensulfothion	1	3	3	3	Good	1.27901	In	31	0.037376	0.940526
326	Chlorfenvinphos	1	3	3	3	Good	1.27873	In	31	0.0830028	0.889236
652	Ethephon	1	3	3	3	Good	1.27784	In	25	0.0156047	0.896122
1267	Phosmet	1	3	3	3	Good	1.26538	In	31	0.0632595	0.928815
115	Ammonium acetate	1	3	3	3	Good	1.25249	In	9	0.0110153	0.93625
265	Calcium acetate	1	3	3	3	Good	1.25249	In	9	0.0110153	0.93625
402	Copper II acetate	1	3	3	3	Good	1.25249	In	9	0.0110153	0.93625
1033	Lindane	1	3	3	3	Good	1.25023	In	9	0.00993283	0.942515
683	Etrimfos	1	3	3	3	Good	1.24916	In	31	0.0497301	0.925377
1445	Sodium ferric EDTA	1	3	3	3	Good	1.24637	In	9	0.00808963	0.953182
1348	Pydanon	1	3	3	3	Good	1.2421	In	9	0.00605137	0.964979
909	Heptachlor	1	3	3	3	Good	1.24101	In	9	0.00552962	0.967998
621	Edifenphos	1	3	2	2	Moderate	1.23543	In	30	0.178619	0.817528
224	Bromocyclen	1	3	3	3	Good	1.23074	In	9	0.000625	0.996385
880	Gliftor	1	3	3	3	Good	1.22954	In	9	5.12e-05	0.999704
312	Chlordane	1	3	3	3	Good	1.22943	In	9	0	1
102	Amidothioate	1	3	3	3	Good	1.22826	In	6	0.0277516	0.963743
519	Dichlorvos	1	3	3	3	Good	1.22512	In	9	0.00205938	0.988222
298	Chloralose	1	3	3	3	Good	1.22185	In	9	0.00362058	0.979476
1021	Kelevan	1	3	3	3	Good	1.22086	In	9	0.00409363	0.976857
1031	Lime sulphur	1	3	3	3	Good	1.21892	In	9	0.00501762	0.971781
309	Chlorbicyclen	1	3	3	3	Good	1.21564	In	9	0.00658479	0.96329
11	1,1,1-trichloroethane	1	3	3	3	Good	1.21319	In	9	0.00775683	0.957037
1590	Trichlorfon	1	3	3	3	Good	1.21281	In	9	0.00793602	0.956088
807	Fluoroacetamide	1	3	3	3	Good	1.20872	In	9	0.00988732	0.945876
119	Ammonium thiocyanate	1	3	3	3	Good	1.20863	In	9	0.00993283	0.94564
1409	Quinothion	1	3	3	3	Good	1.20689	In	30	0.108302	0.880579
737	Fenthion sulfoxide	1	3	3	3	Good	1.19756	In	6	0.0339409	0.948581
1237	Parathion-ethyl	1	3	3	3	Good	1.19607	In	6	0.0717136	0.893705
1254	Peroxyacetic acid	1	3	3	3	Good	1.18962	In	9	0.0190123	0.900876
228	Bromophos-ethyl	1	3	3	3	Good	1.18683	In	6	0.0748392	0.889626
1177	Naled	1	3	3	3	Good	1.18397	In	9	0.0217089	0.888386
1040	Malic acid	1	3	3	3	Good	1.17852	In	9	0.0243098	0.876663
236	Bronopol	1	3	3	3	Good	1.17749	In	9	0.0248014	0.874482
31	2,2-dibromo-3-nitrilopropionamide	1	3	3	3	Good	1.1723	In	9	0.0272794	0.86365
736	Fenthion	1	3	3	3	Good	1.1716	In	6	9.83e-06	0.999989
649	Ethanedial	1	3	3	3	Good	1.16188	In	9	0.0322561	0.842689
866	Fumaric acid	1	3	3	3	Good	1.16188	In	9	0.0322561	0.842689
503	Dichlofenthion	1	3	3	3	Good	1.15821	In	6	0.0475371	0.929832
1454	Sodium tetraborate pentahydrate	1	3	3	3	Good	1.15667	In	9	0.034743	0.832591
1591	Trichloronate	1	3	3	3	Good	1.15505	In	6	0.0487737	0.928358
90	Alpha-endosulfan	1	3	3	3	Good	1.15166	In	9	0.0371385	0.82309
191	Beta-endosulfan	1	3	3	3	Good	1.15166	In	9	0.0371385	0.82309
625	Endosulfan	1	3	3	3	Good	1.15166	In	9	0.0371385	0.82309
133	Azamethiphos	1	3	3	3	Good	1.14013	In	24	0.0833595	0.909411
358	Chlorpyrifos	1	3	3	3	Good	1.13575	In	24	0.074608	0.907108
1017	Kaolin	1	3	3	3	Good	1.12118	In	9	0.0516935	0.769723
1209	Octachlorodipropyl ether	1	3	3	3	Good	1.11728	In	9	0.0535554	0.763391
627	Endothion	1	3	3	3	Good	1.11592	In	34	0.19451	0.668328
979	Isobenzan	1	3	3	3	Good	1.1141	In	9	0.0550728	0.758308
465	Dalapon	1	3	3	3	Good	1.11299	In	9	0.0556034	0.756546
1511	Tetrachlorvinphos	1	3	3	3	Good	1.11144	In	24	0.0806558	0.922643
572	Dimethylvinphos	1	3	3	3	Good	1.1061	In	24	0.0655548	0.920786
704	Fenitrothion	1	3	3	3	Good	1.10397	In	6	0.07018	0.905173
540	Dietholate	1	3	3	3	Good	1.10345	In	6	0.0311144	0.961978
851	Fonofos	1	3	3	3	Good	1.09902	In	6	0.0798095	0.885613
268	Calcium cyanamide	1	3	3	3	Good	1.08912	In	9	0.0670039	0.720577
270	Calvinphos	1	3	3	3	Good	1.07979	In	9	0.0714608	0.707429
75	Afidopyropen	1	3	3	3	Good	1.06607	In	8	0.14831	0.532729
1556	Tolclofos-methyl	1	3	3	3	Good	1.05877	In	6	0.0534292	0.944189
1557	Tolfenpyrad	1	3	3	3	Good	1.05877	In	6	0.0534292	0.944189
1264	Phosametine	1	3	3	3	Good	1.05466	In	34	0.200629	0.642343
1449	Sodium monochloroacetate	1	3	3	3	Good	1.05418	In	9	0.0836903	0.673697
344	Chloropon	1	3	3	3	Good	1.0489	In	9	0.0862118	0.667139
9	1,1,1,2-tetrachloroethane	1	3	3	3	Good	1.03966	In	9	0.0906243	0.655963
1378	Pyridafenthion	1	3	3	3	Good	1.03506	In	31	0.218965	0.650304
420	Cyanophos	1	3	3	3	Good	1.02317	In	6	0.045266	0.933908
366	Chlorthion	1	3	3	3	Good	1.01276	In	24	0.034174	0.959012
1268	Phosnichlor	1	3	3	3	Good	1.01276	In	24	0.034174	0.959012
961	Iodofenphos	1	3	3	3	Good	1.00844	In	24	0.0503216	0.955574
978	Isazofos	1	3	3	3	Good	0.999265	In	31	0.219507	0.650369
297	Chloral hydrate	1	3	3	3	Good	0.999129	In	9	0.109978	0.611067
1238	Parathion-methyl	1	3	3	3	Good	0.997103	In	24	0.0443996	0.960803
135	Azinphos-ethyl	1	3	3	3	Good	0.994435	In	31	0.215548	0.669052
29	2-(octylthio)ethanol	1	3	3	3	Good	0.986287	In	34	0.0943317	0.789991
227	Bromophos	1	3	3	3	Good	0.979847	In	24	0.0353838	0.968762
537	Dienochlor	1	3	3	3	Good	0.977257	In	9	0.120423	0.589299
1485	TCA-ethadyl	1	3	3	3	Good	0.974169	In	9	0.121897	0.586351
1168	Mucochloric anhydride	1	3	3	3	Good	0.963748	In	9	0.126874	0.576613
697	Fenchlorphos	1	3	3	3	Good	0.962942	In	24	0.0265519	0.976559
1176	Naftalofos	1	3	3	3	Good	0.946912	In	6	0.0679522	0.904106
1210	Octhilinone	1	3	3	3	Good	0.946154	In	34	0.0765217	0.829641
1308	Profoxydim	1	3	3	3	Good	0.944201	In	8	0.0674678	0.781686
1287	Piprotal	1	3	3	3	Good	0.942345	In	8	0.0787395	0.735045
1450	Sodium monofluoroacetate	1	3	3	3	Good	0.938384	In	9	0.138986	0.554212
874	Furethrin	1	3	3	3	Good	0.937668	In	8	0.0572463	0.823843
313	Chlordecone	1	3	3	3	Good	0.937526	In	9	0.139396	0.553484
302	Chloranil	1	3	3	3	Good	0.933084	In	9	0.141517	0.549749
258	Butroxydim	1	3	3	3	Good	0.930149	In	8	0.0471586	0.860519
1435	Silica	1	3	3	3	Good	0.927866	In	9	0.144009	0.545425
1154	Mirex	1	3	3	3	Good	0.925501	In	9	0.145138	0.543487
58	Acequinocyl	1	3	3	3	Good	0.915336	In	8	0.0371555	0.877503
1280	Pinoxaden	1	3	3	3	Good	0.91532	In	8	0.0475454	0.85037
632	EPN	1	3	3	3	Good	0.913827	In	30	0.0312114	0.96526
359	Chlorpyrifos-methyl	1	3	3	3	Good	0.912113	In	24	4.87e-06	0.999996
1257	Phenkapton	1	3	3	3	Good	0.912029	In	31	0.211232	0.717119
491	Diamidaphos	1	3	3	3	Good	0.903184	In	6	0.106425	0.893501
285	Carbophenothion	1	3	3	3	Good	0.897941	In	31	0.210011	0.71523
237	Brucine	1	3	3	3	Good	0.88988	In	8	0.0512966	0.81841
1461	Spiromesifen	1	3	3	3	Good	0.883816	In	8	0.0254521	0.920139
479	Demeton	1	3	3	3	Good	0.882812	In	34	0.0484123	0.892221
378	Clacyfos	1	3	3	3	Good	0.880725	In	31	0.23221	0.629291
904	Haloxydine	1	3	3	3	Good	0.878583	In	9	0.167544	0.507708
117	Ammonium sulphamate	1	3	3	3	Good	0.871481	In	9	0.170935	0.502698
1344	Prothoate	1	3	3	3	Good	0.870093	In	34	0.0427676	0.904787
1015	Jiajizengxiaolin	1	3	3	3	Good	0.86558	In	6	0.107709	0.880181
861	Fospirate	1	3	3	3	Good	0.865329	In	24	0.0244476	0.978873
87	Alorac	1	3	3	3	Good	0.856961	In	9	0.177869	0.492758
136	Azinphos-methyl	1	3	3	3	Good	0.854626	In	31	0.217542	0.694812
1462	Spiropidion	1	3	3	3	Good	0.8491	In	8	0.06354	0.771907
630	EPBP	1	3	3	3	Good	0.848877	In	30	0.0213673	0.981769
480	Demeton-O-methyl	1	3	3	3	Good	0.847414	In	34	0.0327037	0.927192
958	Inezin	1	3	3	3	Good	0.845584	In	30	0.0667019	0.924839
896	Gypsum	1	3	3	3	Good	0.841912	In	9	0.185056	0.482862
593	Dioxabenzophos	1	3	3	3	Good	0.837455	In	6	0.110552	0.86891
1463	Spirotetramat	1	3	3	3	Good	0.833074	In	8	0.0356489	0.8659
598	Dipotassium phosphonate	1	3	3	3	Good	0.825997	In	9	0.192656	0.47282
604	Disodium phosphonate	1	3	3	3	Good	0.825997	In	9	0.192656	0.47282
478	Demephion-O	1	3	3	3	Good	0.823079	In	34	0.021904	0.951235
421	Cyanthoate	1	3	3	3	Good	0.815871	In	34	0.0187057	0.958356
1627	Vamidothion	1	3	3	3	Good	0.813796	In	34	0.0177847	0.960406
1460	Spirodiclofen	1	3	3	3	Good	0.813665	In	8	0.0437994	0.842066
660	Ethoate-methyl	1	3	3	3	Good	0.812756	In	34	0.0173232	0.961434
1376	Pyridaben	1	3	3	3	Good	0.804767	In	8	0.015883	0.941711
725	Fenpropimorph	1	3	3	3	Good	0.804617	In	8	0.0654474	0.767117
797	Flumiclorac-pentyl	1	3	3	3	Good	0.801779	In	8	0.0831982	0.724159
1563	Tralkoxydim	1	3	3	3	Good	0.800116	In	8	0.014928	0.948696
1626	Valifenalate	1	3	3	3	Good	0.799281	In	8	0.0504421	0.825232
1063	Mecarbam	1	3	3	3	Good	0.798541	In	34	0.011015	0.975477
1216	Orysastrobin	1	3	3	3	Good	0.796374	In	8	0.0693041	0.76701
1167	Morphothion	1	3	3	3	Good	0.794327	In	34	0.00914478	0.979641
1030	Leptophos	1	3	3	3	Good	0.794004	In	30	5.57e-06	0.999995
1497	Tefuryltrione	1	3	3	3	Good	0.792171	In	8	0.0875903	0.715176
98	Amidithion	1	3	3	3	Good	0.791702	In	34	0.00797985	0.982235
634	Epofenonane	1	3	3	3	Good	0.788778	In	8	0.0596695	0.788967
1333	Propyl isome	1	3	3	3	Good	0.787034	In	8	0.0380233	0.873692
1577	Triapenthenol	1	3	3	3	Good	0.785941	In	8	0.0382024	0.86381
566	Dimethoate	1	3	3	3	Good	0.784088	In	34	0.00460094	0.989757
1134	Methylisothiazoline	1	3	3	3	Good	0.778244	In	34	0.00200785	0.99553
1022	Ketospiradox	1	3	3	3	Good	0.775555	In	8	0.079226	0.74622
1120	Methomyl	1	3	3	3	Good	0.775135	In	34	0.000628	0.998602
1323	Propargite	1	3	3	3	Good	0.774943	In	8	0.0170073	0.937119
1459	Spirobudifen	1	3	3	3	Good	0.77331	In	8	0.0631644	0.796483
1282	Piperonyl butoxide	1	3	3	3	Good	0.772695	In	8	0.0177118	0.934044
1479	Sulphuric acid	1	3	3	3	Good	0.768983	In	9	0.219883	0.440036
1065	Mecarphon	1	3	3	3	Good	0.768695	In	34	0.00223	0.99506
666	Ethoxylated p-nonylphenol	1	3	3	3	Good	0.762784	In	8	0.0519704	0.824825
975	Iprovalicarb	1	3	3	3	Good	0.75753	In	8	0.0297091	0.921451
1457	Spidoxamat	1	3	3	3	Good	0.753848	In	8	0.0380332	0.902197
481	Demeton-O-methyl sulfone	1	3	3	3	Good	0.752561	In	34	0.0093899	0.979523
176	Benzamorf	1	3	3	3	Good	0.749573	In	8	0.0491909	0.843049
582	Dinocap	1	3	3	3	Good	0.748116	In	8	0.0585116	0.827986
1088	Meptyldinocap	1	3	3	3	Good	0.748116	In	8	0.0585116	0.827986
461	Cypyrafluone	1	3	3	3	Good	0.746771	In	8	0.124361	0.636973
724	Fenpropidin	1	3	3	3	Good	0.745746	In	8	0.104665	0.665545
1284	Piperonyl sulfoxide	1	3	3	3	Good	0.741857	In	8	0.0480007	0.853692
1528	Thidiazimin	1	3	3	3	Good	0.740808	In	8	0.0624226	0.819931
1504	Terbuchlor	1	3	3	3	Good	0.739988	In	8	0.0477642	0.856272
1213	Omethoate	1	3	3	3	Good	0.739254	In	34	0.0152952	0.96707
856	Formothion	1	3	3	3	Good	0.737148	In	34	0.0162297	0.965128
1283	Piperonyl cyclonene	1	3	3	3	Good	0.731537	In	8	0.0469605	0.867929
726	Fenpyrazamine	1	3	3	3	Good	0.731065	In	8	0.0331499	0.887627
568	Dimethrin	1	3	3	3	Good	0.730547	In	8	0.0707046	0.777067
1436	Silthiofam	1	3	3	3	Good	0.725247	In	8	0.0864204	0.728429
372	Cinidon-ethyl	1	3	3	3	Good	0.723384	In	8	0.0717892	0.801345
914	Hexachloroacetone	1	3	3	3	Good	0.723027	In	9	0.241829	0.416745
1068	Mecoprop etexyl	1	3	3	3	Good	0.721213	In	8	0.0465889	0.882171
1071	Mecoprop-P etexyl	1	3	3	3	Good	0.721213	In	8	0.0465889	0.882171
923	Hexythiazox	1	3	3	3	Good	0.720782	In	8	0.0360074	0.875144
821	Flupropadine	1	3	3	3	Good	0.718141	In	8	0.0916809	0.741602
822	Flupropadine hydrochloride	1	3	3	3	Good	0.718141	In	8	0.0916809	0.741602
1041	Malonoben	1	3	3	3	Good	0.715345	In	8	0.0678806	0.797106
244	Butafenacil	1	3	3	3	Good	0.713886	In	8	0.167623	0.551239
493	Diammonium phosphate	1	3	3	3	Good	0.712148	In	9	0.247024	0.411588
164	Bensulide	1	3	3	3	Good	0.710082	In	8	0.039619	0.862522
739	Fentrazamide	1	3	3	3	Good	0.709796	In	8	0.0472195	0.855503
798	Flumioxazin	1	3	3	3	Good	0.697557	In	8	0.0857489	0.775295
193	Bicyclopyrone	1	3	3	3	Good	0.697459	In	8	0.118855	0.677351
588	Dinosulfon	1	3	3	3	Good	0.696773	In	8	0.0693244	0.835007
242	Buprofezin	1	3	3	3	Good	0.696541	In	8	0.0656954	0.821893
1367	Pyrazophos	1	3	3	3	Good	0.69234	In	6	0.20743	0.74685
243	Butachlor	1	3	3	3	Good	0.691722	In	8	0.0653858	0.828246
711	Fenoprop-isoctyl	1	3	3	3	Good	0.688971	In	8	0.0480664	0.838659
1070	Mecoprop trolamine	1	3	3	3	Good	0.688853	In	8	0.05827	0.832203
555	Dimefluthrin	1	3	3	3	Good	0.688435	In	8	0.0906941	0.766494
373	Cinmethylin	1	3	3	3	Good	0.687532	In	8	0.0900665	0.738703
877	Furmecyclox	1	3	3	3	Good	0.685876	In	8	0.0547867	0.845228
249	Butenachlor	1	3	3	3	Good	0.682385	In	8	0.0650876	0.840553
511	Dichlorprop-isoctyl	1	3	3	3	Good	0.682031	In	8	0.0512019	0.837989
514	Dichlorprop-P-etexyl	1	3	3	3	Good	0.682031	In	8	0.0512019	0.837989
515	Dichlorprop-isoctyl	1	3	3	3	Good	0.682031	In	8	0.0512019	0.837989
518	Dichlorprop-P-etexyl	1	3	3	3	Good	0.682031	In	8	0.0512019	0.837989
1158	Momfluorothrin	1	3	3	3	Good	0.678092	In	8	0.112947	0.706274
1503	Terbucarb	1	3	3	3	Good	0.67654	In	8	0.0883393	0.752517
583	Dinocton	1	3	3	3	Good	0.673879	In	8	0.0818759	0.810786
1562	Topramezone	1	3	3	3	Good	0.672412	In	8	0.08268	0.809283
1052	MCPA-etexyl	1	3	3	3	Good	0.671557	In	8	0.0652449	0.83412
1055	MCPA-isoctyl	1	3	3	3	Good	0.671557	In	8	0.0652449	0.83412
1484	TCA-ammonium	1	3	3	3	Good	0.65754	In	9	0.273102	0.387516
571	Dimethyl(4-piperidinocarbonyloxy-2,5-xylyl)sulfonium toluene-4-sulfonate	1	3	3	3	Good	0.656784	In	8	0.0862125	0.777345
1541	Thiophanate	1	3	3	3	Good	0.656334	In	8	0.0756839	0.798437
799	Flumipropyn	1	3	3	3	Good	0.655254	In	8	0.0762651	0.797364
1078	Mefenpyr diethyl	1	3	3	3	Good	0.650391	In	8	0.0788863	0.792561
557	Dimefuron	1	3	3	3	Good	0.650164	In	8	0.0661124	0.798072
997	Isopropalin	1	3	3	3	Good	0.649912	In	8	0.0606612	0.804166
1551	Tiocarbazil	1	3	3	3	Good	0.644932	In	33	0.0871479	0.773434
708	Fenoprop-butometyl	1	3	3	3	Good	0.64386	In	8	0.0692175	0.791846
207	Bis-trichloromethyl sulfone	1	3	3	3	Good	0.640502	In	9	0.281238	0.380572
1281	Piperalin	1	3	3	3	Good	0.639602	In	8	0.0687629	0.800767
538	Diethatyl ethyl	1	3	3	3	Good	0.639536	In	8	0.0687746	0.800701
636	Epsilon-metofluthrin	1	3	3	3	Good	0.639396	In	8	0.100781	0.776847
1138	Metofluthrin	1	3	3	3	Good	0.639396	In	8	0.100781	0.776847
86	Allyxycarb	1	3	3	3	Good	0.638709	In	8	0.0854311	0.80006
1251	Pentoxazone	1	3	3	3	Good	0.638499	In	8	0.0853072	0.781057
935	Imazamethabenz-methyl	1	3	3	3	Good	0.637778	In	8	0.0690924	0.798943
284	Carbon tetrachloride	1	3	3	3	Good	0.635668	In	9	0.283546	0.378646
893	Griseofulvin	1	3	3	3	Good	0.634304	In	8	0.0875754	0.777079
823	Flupropanate	1	3	3	3	Good	0.627948	In	9	0.287233	0.375612
1255	Pethoxamid	1	3	3	3	Good	0.627937	In	8	0.0855099	0.796739
175	Benzamacril isobutyl	1	3	3	3	Good	0.627791	In	8	0.0855138	0.796594
1313	Promacyl	1	3	3	3	Good	0.627102	In	8	0.085533	0.795912
1558	Tolprocarb	1	3	3	3	Good	0.626458	In	8	0.0918227	0.769744
238	Bucarpolate	1	3	3	3	Good	0.626245	In	8	0.0696872	0.780941
835	Fluroxypyr-meptyl	1	3	3	3	Good	0.62615	In	8	0.0780984	0.774865
967	Ioxynil octanoate	1	3	3	3	Good	0.625218	In	8	0.0855942	0.794051
1540	Thionazin	1	3	3	3	Good	0.623802	In	6	0.209044	0.726556
241	Bupirimate	1	3	3	3	Good	0.623469	In	8	0.0721079	0.784921
585	Dinopenton	1	3	3	3	Good	0.622951	In	8	0.0937221	0.766512
125	Aramite	1	3	3	3	Good	0.621743	In	8	0.0725203	0.783263
936	Imazamox	1	3	3	3	Good	0.621371	In	8	0.0716967	0.776323
942	Imazethapyr	1	3	3	3	Good	0.614023	In	8	0.0744852	0.775931
562	Dimethenamid	1	3	3	3	Good	0.612554	In	8	0.080291	0.778779
563	Dimethenamid-P	1	3	3	3	Good	0.612554	In	8	0.080291	0.778779
1490	Tebupirimfos	1	3	3	3	Good	0.611862	In	8	0.0863814	0.781107
282	Carbon dioxide	1	3	3	3	Good	0.610794	In	29	0.285466	0.56641
1498	Tembotrione	1	3	3	3	Good	0.608925	In	8	0.16571	0.613194
1220	Oxadiazon	1	3	3	3	Good	0.608659	In	8	0.0771273	0.764533
943	Imazethapyr ammonium	1	3	3	3	Good	0.606644	In	8	0.0765351	0.76905
99	Amidochlor	1	3	3	3	Good	0.605612	In	8	0.0869595	0.775192
1516	Tetramethylfluthrin	1	3	3	3	Good	0.604549	In	8	0.103705	0.749981
496	Dibutyl phthalate	1	3	3	3	Good	0.604543	In	8	0.0870714	0.77419
721	Fenpicoxamid	1	3	3	3	Good	0.60349	In	8	0.0794043	0.75984
714	Fenoxanil	1	3	3	3	Good	0.601838	In	8	0.0779539	0.764634
197	Binapacryl	1	3	3	3	Good	0.600666	In	8	0.0911744	0.751671
257	Butralin	1	3	3	3	Good	0.594306	In	8	0.0803016	0.757814
522	Diclocymet	1	3	3	3	Good	0.592733	In	8	0.0885575	0.763285
1526	Thiazopyr	1	3	3	3	Good	0.591404	In	8	0.143536	0.683916
619	Dufulin	1	3	3	3	Good	0.590021	In	30	0.176395	0.795113
709	Fenoprop-butotyl	1	3	3	3	Good	0.588265	In	8	0.0863025	0.746348
1471	Sulfluramid	1	3	3	3	Good	0.588203	In	29	0.276874	0.57946
232	Bromoxynil-octanoate	1	3	3	3	Good	0.588127	In	8	0.0892579	0.759114
1342	Prothioconazole	1	3	3	3	Good	0.58767	In	8	0.0824857	0.751906
1191	Nitralin	1	3	3	3	Good	0.585549	In	8	0.0990468	0.738557
641	Esprocarb	1	3	3	3	Good	0.584196	In	33	0.0653263	0.82452
1429	Sesamex	1	3	3	3	Good	0.584043	In	8	0.0837224	0.748715
1020	Karbutilate	1	3	3	3	Good	0.582411	In	8	0.0902177	0.754002
1094	Metalaxyl	1	3	3	3	Good	0.581647	In	8	0.0903534	0.753324
1095	Metalaxyl-M	1	3	3	3	Good	0.581647	In	8	0.0903534	0.753324
132	Azafenidin	1	3	3	3	Good	0.581474	In	8	0.0894594	0.740483
509	Dichlorprop-butotyl	1	3	3	3	Good	0.581471	In	8	0.0846165	0.746469
1307	Profluthrin	1	3	3	3	Good	0.580918	In	8	0.101472	0.73463
1275	Picloram-isoctyl	1	3	3	3	Good	0.580872	In	8	0.084827	0.745947
291	Carpropamid	1	3	3	3	Good	0.580827	In	8	0.0905012	0.752597
1083	Meperfluthrin	1	3	3	3	Good	0.579163	In	8	0.150221	0.674746
1416	Renofluthrin	1	3	3	3	Good	0.579163	In	8	0.150221	0.674746
475	Delachlor	1	3	3	3	Good	0.57901	In	33	0.0786173	0.838989
1139	Metolachlor	1	3	3	3	Good	0.57901	In	33	0.0786173	0.838989
1330	Propisochlor	1	3	3	3	Good	0.57901	In	33	0.0786173	0.838989
1443	S-metolachlor	1	3	3	3	Good	0.57901	In	33	0.0786173	0.838989
934	Imazamethabenz	1	3	3	3	Good	0.578784	In	8	0.0908776	0.750793
1172	N-(3-chloro-2,6-dimethylphenyl)-2-methoxy-N-(tetrahydr-2-oxo-3-furanyl)acetamide	1	3	3	3	Good	0.576646	In	8	0.0863316	0.74229
558	Dimepiperate	1	3	3	3	Good	0.575553	In	33	0.0630814	0.833115
435	Cycloxaprid	1	3	3	3	Good	0.575278	In	8	0.0923763	0.735212
141	Azothoate	1	3	3	3	Good	0.573872	In	30	0.17745	0.802267
1604	Trifludimoxazin	1	3	3	3	Good	0.573513	In	8	0.184695	0.590811
1453	Sodium silver thiosulphate	1	3	3	3	Good	0.573311	In	29	0.27121	0.588063
910	Heptafluthrin	1	3	3	3	Good	0.573304	In	8	0.184807	0.590684
1219	Oxadiargyl	1	3	3	3	Good	0.571571	In	8	0.0941368	0.732094
1048	MCPA-butotyl	1	3	3	3	Good	0.570612	In	8	0.0925037	0.743663
223	Bromobutide	1	3	3	3	Good	0.56985	In	33	0.0617285	0.838785
7	1-(4-chloro-1,3-dihydro-1,3-dioxo-2H-isoindole-2-yl)-cyclohexanecarboxamide	1	3	3	3	Good	0.569479	In	8	0.0889626	0.736171
731	Fenridazon-propyl	1	3	3	3	Good	0.569479	In	8	0.0889626	0.736171
250	Buthidazole	1	3	3	3	Good	0.568742	In	8	0.0900574	0.739358
581	Dinobuton	1	3	3	3	Good	0.56643	In	8	0.109091	0.722612
820	Flupropacil	1	3	3	3	Good	0.562226	In	8	0.159473	0.662455
796	Flumiclorac	1	3	3	3	Good	0.560011	In	8	0.127936	0.712775
343	Chloropicrin	1	3	3	3	Good	0.559514	In	29	0.265962	0.596034
1217	Oryzalin	1	3	3	3	Good	0.559203	In	8	0.112909	0.716762
1337	Proquinazid	1	3	3	3	Good	0.558523	In	20	0.0787578	0.840363
611	Dithiopyr	1	3	3	3	Good	0.55381	In	8	0.147703	0.703731
937	Imazapic	1	3	3	3	Good	0.552717	In	8	0.0966964	0.728513
938	Imazapic-ammonium	1	3	3	3	Good	0.552717	In	8	0.0966964	0.728513
290	Carfentrazone-ethyl	1	3	3	3	Good	0.551697	In	8	0.165226	0.655038
894	Guadipyr	1	3	3	3	Good	0.551679	In	8	0.0958827	0.721399
248	Butathiofos	1	3	3	3	Good	0.550285	In	20	0.0791093	0.833617
1595	Triclopyr-triethylammonium	1	3	3	3	Good	0.54578	In	8	0.0982825	0.716633
1221	Oxadixyl	1	3	3	3	Good	0.541845	In	8	0.0996298	0.719607
1542	Thiophanate-methyl	1	3	3	3	Good	0.539513	In	8	0.109754	0.706195
790	Flufenpyr-ethyl	1	3	3	3	Good	0.534011	In	8	0.190753	0.602943
1491	Tebutam	1	3	3	3	Good	0.533035	In	33	0.0496178	0.864988
315	Chloretazate	1	3	3	3	Good	0.532736	In	8	0.102291	0.71231
599	Dipropalin	1	3	3	3	Good	0.532334	In	8	0.102412	0.711992
1244	Pendimethalin	1	3	3	3	Good	0.532334	In	8	0.102412	0.711992
539	Diethofencarb	1	3	3	3	Good	0.531576	In	20	0.0807228	0.81869
1605	Trifluenfuronate	1	3	3	3	Good	0.530103	In	8	0.144242	0.689797
152	Bencarbazone	1	3	3	3	Good	0.529722	In	8	0.193084	0.600328
1640	Zoxamide	1	3	3	3	Good	0.526488	In	8	0.104215	0.707391
1306	Profluralin	1	3	3	3	Good	0.525819	In	8	0.14658	0.686626
1195	Nitrothal-isopropyl	1	3	3	3	Good	0.524176	In	8	0.107445	0.699704
1303	Prodiamine	1	3	3	3	Good	0.52098	In	8	0.149221	0.68308
1411	Quintiofos	1	3	3	3	Good	0.519264	In	30	0.137364	0.864072
1092	Mesotrione	1	3	3	3	Good	0.519009	In	8	0.134294	0.685884
1338	Prosulfocarb	1	3	3	3	Good	0.51608	In	33	0.0429283	0.881849
702	Fenhexamid	1	3	3	3	Good	0.515625	In	20	0.0829498	0.80638
62	Acetochlor	1	3	3	3	Good	0.51261	In	33	0.0552711	0.889485
76	Alachlor	1	3	3	3	Good	0.51261	In	33	0.0552711	0.889485
1051	MCPA-diolamine	1	3	3	3	Good	0.511204	In	8	0.109232	0.695638
1509	Tetcyclacis	1	3	3	3	Good	0.507272	In	20	0.0844074	0.800081
1019	Kappa-tefluthrin	1	3	3	3	Good	0.50715	In	8	0.205359	0.586934
1496	Tefluthrin	1	3	3	3	Good	0.50715	In	8	0.205359	0.586934
1122	Methoprotryne	1	3	3	3	Good	0.505175	In	20	0.0554544	0.886481
356	Chlorprocarb	1	3	3	3	Good	0.502552	In	8	0.11225	0.689156
1432	Siduron	1	3	3	3	Good	0.501652	In	33	0.0378697	0.896195
1211	Ofurace	1	3	3	3	Good	0.499708	In	20	0.0858897	0.79446
1468	Sulcotrione	1	3	3	3	Good	0.498089	In	8	0.119141	0.6803
1593	Triclopyr-butotyl	1	3	3	3	Good	0.497522	In	8	0.119401	0.67989
974	Iprodione	1	3	3	3	Good	0.49626	In	8	0.119982	0.67898
1363	Pyrasulfotole	1	3	3	3	Good	0.495959	In	8	0.162881	0.665311
1075	Medinoterb acetate	1	3	3	3	Good	0.495424	In	8	0.120367	0.678378
269	Calcium phosphate	1	3	3	3	Good	0.495344	In	29	0.241556	0.633105
745	Ferric phosphate	1	3	3	3	Good	0.495344	In	29	0.241556	0.633105
876	Furilazole	1	3	3	3	Good	0.494908	In	8	0.116296	0.681245
116	Ammonium carbonate	1	3	3	3	Good	0.493821	In	29	0.240977	0.633984
145	Barium carbonate	1	3	3	3	Good	0.493821	In	29	0.240977	0.633984
267	Calcium carbonate	1	3	3	3	Good	0.493821	In	29	0.240977	0.633984
403	Copper II carbonate	1	3	3	3	Good	0.493821	In	29	0.240977	0.633984
530	Dicopper carbonate dihydroxide	1	3	3	3	Good	0.493821	In	29	0.240977	0.633984
1032	Limestone	1	3	3	3	Good	0.493821	In	29	0.240977	0.633984
775	Fluchloraminopyr-tefuryl	1	3	3	3	Good	0.490977	In	8	0.134323	0.670293
1492	Tebuthiuron	1	3	3	3	Good	0.487577	In	20	0.0567658	0.871393
1589	Trichlamide	1	3	3	3	Good	0.487498	In	8	0.117773	0.678162
1292	P-nonylphenol	1	3	3	3	Good	0.487379	In	33	0.0520275	0.898681
1072	Mecoprop-P isobutyl	1	3	3	3	Good	0.486728	In	20	0.0568644	0.870678
155	Benfluralin	1	3	3	3	Good	0.485687	In	8	0.152164	0.662233
1609	Trifluralin	1	3	3	3	Good	0.485687	In	8	0.152164	0.662233
939	Imazapyr	1	3	3	3	Good	0.483777	In	20	0.0894796	0.782876
990	Isolan	1	3	3	3	Good	0.483681	In	20	0.0572438	0.868122
1005	Isouron	1	3	3	3	Good	0.483681	In	20	0.0572438	0.868122
458	Cyprofuram	1	3	3	3	Good	0.481045	In	20	0.0901548	0.780924
661	Ethofumesate	1	3	3	3	Good	0.480944	In	20	0.0901801	0.780852
561	Dimethametryn	1	3	3	3	Good	0.480789	In	33	0.0321721	0.916943
600	Dipropetryn	1	3	3	3	Good	0.480789	In	33	0.0321721	0.916943
1305	Profluazol	1	3	3	3	Good	0.477776	In	8	0.189388	0.64943
1434	Silatrane	1	3	3	3	Good	0.471052	In	20	0.0592289	0.857685
620	Ecolyst	1	3	3	3	Good	0.470224	In	33	0.0432677	0.91574
424	Cybutryne	1	3	3	3	Good	0.46909	In	33	0.0301762	0.928576
713	Fenothiocarb	1	3	3	3	Good	0.467351	In	33	0.0299699	0.930306
1350	Pyflubumide	1	3	3	3	Good	0.465546	In	8	0.127319	0.661756
647	Ethalfluralin	1	3	3	3	Good	0.45899	In	8	0.166543	0.644429
703	Fenitropan	1	3	3	3	Good	0.454221	In	20	0.129714	0.69511
307	Chlorazine	1	3	3	3	Good	0.453179	In	33	0.0292558	0.941766
498	Dicamba diglycolamine	1	3	3	3	Good	0.452386	In	20	0.130317	0.694024
929	Hyquincarb	1	3	3	3	Good	0.450707	In	20	0.029294	0.942986
1166	Morfamquat	1	3	3	3	Good	0.450707	In	20	0.029294	0.942986
1628	Verbutin	1	3	3	3	Good	0.449813	In	20	0.0292998	0.942151
667	Ethoxyquin	1	3	3	3	Good	0.448498	In	33	0.0321733	0.937345
1568	Transfluthrin	1	3	3	3	Good	0.447512	In	8	0.172738	0.637066
355	Chlorprazophos	1	3	3	3	Good	0.445896	In	27	0.22095	0.652957
222	Bromobonil	1	3	3	3	Good	0.445512	In	20	0.132612	0.689982
710	Fenoprop-butyl	1	3	3	3	Good	0.443855	In	20	0.100834	0.755281
1523	Thiamethoxam	1	3	3	3	Good	0.440896	In	8	0.15444	0.638597
560	Dimethachlor	1	3	3	3	Good	0.43778	In	20	0.0300619	0.931063
225	Bromofenoxim	1	3	3	3	Good	0.434992	In	8	0.1962	0.625654
418	Cyanatryn	1	3	3	3	Good	0.428091	In	20	0.0315468	0.922322
368	Chlozolinate	1	3	3	3	Good	0.426071	In	8	0.153734	0.63192
385	Clofencet	1	3	3	3	Good	0.425511	In	20	0.106958	0.743243
857	Formparanate	1	3	3	3	Good	0.423447	In	20	0.032503	0.918191
376	Cisanilide	1	3	3	3	Good	0.423204	In	33	0.0192573	0.962498
587	Dinoseb acetate	1	3	3	3	Good	0.42219	In	20	0.140772	0.676613
591	Dinoterb acetate	1	3	3	3	Good	0.42219	In	20	0.140772	0.676613
700	Fenfluthrin	1	3	3	3	Good	0.418715	In	8	0.205101	0.615853
1006	Isoval	1	3	3	3	Good	0.418645	In	20	0.0336401	0.913957
1279	Pindone	1	3	3	3	Good	0.418645	In	20	0.0336401	0.913957
289	Carfentrazone	1	3	3	3	Good	0.414047	In	8	0.207654	0.613099
1189	Nitenpyram	1	3	3	3	Good	0.413846	In	20	0.0748354	0.81339
773	Fluchloralin	1	3	3	3	Good	0.412901	In	8	0.191459	0.615846
169	Benthiavalicarb-isopropyl	1	3	3	3	Good	0.411888	In	20	0.0491919	0.873548
1288	Pirimicarb	1	3	3	3	Good	0.411497	In	20	0.0355803	0.907727
1159	Monalide	1	3	3	3	Good	0.409897	In	33	0.012462	0.975731
1249	Pentanochlor	1	3	3	3	Good	0.409897	In	33	0.012462	0.975731
1634	Xylachlor	1	3	3	3	Good	0.409897	In	33	0.012462	0.975731
576	Dinex	1	3	3	3	Good	0.409685	In	20	0.112602	0.733162
577	Dinex-diclexine	1	3	3	3	Good	0.409685	In	20	0.112602	0.733162
1184	Neburon	1	3	3	3	Good	0.40965	In	20	0.0361249	0.906131
1049	MCPA-butyl	1	3	3	3	Good	0.409219	In	20	0.0362541	0.90576
1054	MCPA-isobutyl	1	3	3	3	Good	0.409219	In	20	0.0362541	0.90576
239	Bufencarb	1	3	3	3	Good	0.408393	In	33	0.0116943	0.977226
438	Cyenopyrafen	1	3	3	3	Good	0.40708	In	33	0.0188032	0.954492
1310	Proglinazine-ethyl	1	3	3	3	Good	0.403632	In	20	0.0784478	0.805958
1316	Prometryn	1	3	3	3	Good	0.400821	In	33	0.00782747	0.984757
1508	Terbutryn	1	3	3	3	Good	0.400821	In	33	0.00782747	0.984757
1302	Procymidone	1	3	3	3	Good	0.398824	In	20	0.0802098	0.802507
1470	Sulfentrazone	1	3	3	3	Good	0.397761	In	8	0.199663	0.607002
1067	Mecoprop dimethylammonium	1	3	3	3	Good	0.397675	In	20	0.040018	0.895918
280	Carbetamide	1	3	3	3	Good	0.393587	In	20	0.0414709	0.892484
789	Flufenpyr	1	3	3	3	Good	0.393066	In	8	0.23583	0.59802
1228	Oxolinic acid	1	3	3	3	Good	0.39276	In	20	0.118952	0.722679
173	Benzalkonium chloride	1	3	3	3	Good	0.391532	In	33	0.0543292	0.860618
1214	Orbencarb	1	3	3	3	Good	0.386382	In	33	0.000454	0.999115
1165	Monuron-TCA	1	3	3	3	Good	0.384274	In	20	0.155084	0.655951
157	Benfuresate	1	3	3	3	Good	0.382709	In	20	0.0455785	0.883474
1152	Mexacarbate	1	3	3	3	Good	0.38192	In	20	6.45e-06	0.999988
1077	Mefenpyr	1	3	3	3	Good	0.381873	In	20	0.156028	0.654685
1352	Pyracarbolid	1	3	3	3	Good	0.380791	In	20	0.000584	0.99887
150	Benazolin-dimethylammonium	1	3	3	3	Good	0.380403	In	20	0.0872726	0.789552
580	Dinitramine	1	3	3	3	Good	0.379651	In	8	0.192735	0.600294
825	Flupyrimin	1	3	3	3	Good	0.378802	In	8	0.177552	0.603739
1223	Oxapyrazon	1	3	3	3	Good	0.378578	In	20	0.157329	0.652955
1301	Procyazine	1	3	3	3	Good	0.374731	In	20	0.0487751	0.87698
968	Ipazine	1	3	3	3	Good	0.370454	In	20	0.00587056	0.988754
1315	Prometon	1	3	3	3	Good	0.370077	In	20	0.00606317	0.988389
1426	Secbumeton	1	3	3	3	Good	0.370077	In	20	0.00606317	0.988389
1506	Terbumeton	1	3	3	3	Good	0.370077	In	20	0.00606317	0.988389
1171	Myclozolin	1	3	3	3	Good	0.36364	In	20	0.130499	0.705327
415	Crotamiton	1	3	3	3	Good	0.361746	In	33	0.0432845	0.888443
92	Aluminium ammonium sulphate	1	3	2	2	Moderate	0.358108	In	29	0.189359	0.712385
118	Ammonium sulphate	1	3	2	2	Moderate	0.358108	In	29	0.189359	0.712385
406	Copper sulphate	1	3	2	2	Moderate	0.358108	In	29	0.189359	0.712385
212	Bixlozone	1	3	3	3	Good	0.357562	In	20	0.0560446	0.863324
446	Cymiazol	1	3	3	3	Good	0.356329	In	33	0.0415598	0.893502
287	Carboxazole	1	3	3	3	Good	0.354003	In	20	0.0489944	0.880883
1358	Pyramat	1	3	3	3	Good	0.353842	In	20	0.0143667	0.972918
574	Dimidazon	1	3	3	3	Good	0.352515	In	20	0.0582612	0.85939
1218	Oxabetrinil	1	3	3	3	Good	0.352515	In	20	0.0582612	0.85939
586	Dinosam	1	3	3	3	Good	0.35013	In	20	0.0997299	0.769148
1074	Medinoterb	1	3	3	3	Good	0.35013	In	20	0.0997299	0.769148
259	Buturon	1	3	3	3	Good	0.349612	In	20	0.0165299	0.968967
1080	Mefluidide	1	3	3	3	Good	0.34949	In	20	0.169107	0.638075
177	Benzfendizone	1	3	3	3	Good	0.34901	In	20	0.100207	0.768413
412	Coumoxystrobin	1	3	3	3	Good	0.348824	In	20	0.016933	0.968235
1000	Isoproturon	1	3	3	3	Good	0.346477	In	33	0.0387334	0.902706
1362	Pyrapropoyne	1	3	3	3	Good	0.346039	In	20	0.0572777	0.86342
824	Flupyradifurone	1	3	3	3	Good	0.342354	In	20	0.139342	0.693161
1353	Pyraclofos	1	3	3	3	Good	0.338232	In	27	0.226906	0.624075
730	Fenridazon	1	3	3	3	Good	0.337377	In	20	0.105219	0.760864
855	Formetanate	1	3	3	3	Good	0.336521	In	20	0.0232252	0.956939
281	Carbofuran	1	3	3	3	Good	0.335511	In	20	0.0237417	0.956024
1100	Metarylpicoxamid	1	3	3	3	Good	0.335511	In	20	0.0237417	0.956024
390	Clomazone	1	3	3	3	Good	0.334786	In	20	0.0241127	0.955367
510	Dichlorprop-dimethylammonium	1	3	3	3	Good	0.33456	In	20	0.0663596	0.845681
948	Imidaclothiz	1	3	3	3	Good	0.330533	In	20	0.151171	0.674157
174	Benzamacril	1	3	3	3	Good	0.330408	In	20	0.0263521	0.951423
925	Hydramethylnon	1	3	3	3	Good	0.330117	In	20	0.088881	0.796925
1201	Norflurazon	1	3	3	3	Good	0.324656	In	20	0.179528	0.625897
317	Chloreturon	1	3	3	3	Good	0.321926	In	20	0.0306899	0.943876
1056	MCPA-isopropyl	1	3	3	3	Good	0.320916	In	20	0.0312064	0.942985
1630	Vinclozolin	1	3	3	3	Good	0.32062	In	20	0.112599	0.750247
405	Copper oxychloride	1	3	2	2	Moderate	0.319596	In	29	0.174712	0.734633
70	Acrinathrin	1	3	3	3	Good	0.318091	In	20	0.14975	0.679796
699	Fenethacarb	1	3	3	3	Good	0.317881	In	16	0.0317536	0.944859
706	Fenobucarb	1	3	3	3	Good	0.317881	In	16	0.0317536	0.944859
1314	Promecarb	1	3	3	3	Good	0.317881	In	16	0.0317536	0.944859
1016	Kadethrin	1	3	3	3	Good	0.317737	In	16	0.0223326	0.948386
623	Eglinazine-ethyl	1	3	3	3	Good	0.316521	In	20	0.0747492	0.832342
384	Cloethocarb	1	3	3	3	Good	0.314501	In	20	0.0757007	0.830874
848	Fluxofenim	1	3	3	3	Good	0.312717	In	20	0.184639	0.620206
1336	Propyzamide	1	3	3	3	Good	0.312655	In	16	0.0351262	0.924307
95	Ametryn	1	3	3	3	Good	0.309599	In	16	0.0275016	0.952243
1050	MCPA-dimethylammonium	1	3	3	3	Good	0.308892	In	16	0.035784	0.921275
960	Iodobonil	1	3	3	3	Good	0.306617	In	20	0.079434	0.825196
449	Cypendazole	1	3	3	3	Good	0.305281	In	16	0.0365002	0.918384
419	Cyanazine	1	3	3	3	Good	0.303369	In	16	0.0369114	0.916861
768	Flubendiamide	1	3	3	3	Good	0.299482	In	20	0.157929	0.66989
151	Benazolin-ethyl	1	3	3	3	Good	0.298522	In	16	0.0826457	0.814923
73	Acynonapyr	1	3	3	3	Good	0.296461	In	16	0.104179	0.7724
1351	Pymetrozine	1	3	3	3	Good	0.295342	In	16	0.0388619	0.91052
1522	Thiacloprid	1	3	3	3	Good	0.294127	In	16	0.0391864	0.909568
833	Flurochloridone	1	3	3	3	Good	0.291897	In	20	0.161305	0.665934
1567	Trans-flurochloridone	1	3	3	3	Good	0.291897	In	20	0.161305	0.665934
654	Ethiofencarb	1	3	3	3	Good	0.291881	In	16	0.018406	0.968038
1114	Methiocarb	1	3	3	3	Good	0.291881	In	16	0.018406	0.968038
103	Aminocarb	1	3	3	3	Good	0.28845	In	16	0.0166446	0.971096
1347	Prynachlor	1	3	3	3	Good	0.285814	In	16	0.015291	0.973447
1408	Quinonamid	1	3	3	3	Good	0.285439	In	20	0.164197	0.662602
639	Erbon	1	3	3	3	Good	0.284566	In	20	0.164589	0.662155
371	Chromafenozide	1	3	3	3	Good	0.283559	In	28	0.022233	0.946006
865	Fufenozide	1	3	3	3	Good	0.283559	In	28	0.022233	0.946006
1637	Zarilamid	1	3	3	3	Good	0.277425	In	16	0.0443018	0.896678
129	Atraton	1	3	3	3	Good	0.275973	In	16	0.0102391	0.98222
1324	Propazine	1	3	3	3	Good	0.275875	In	16	0.0101888	0.982307
1425	Sebuthylazine	1	3	3	3	Good	0.275875	In	16	0.0101888	0.982307
1507	Terbuthylazine	1	3	3	3	Good	0.275875	In	16	0.0101888	0.982307
1599	Trietazine	1	3	3	3	Good	0.275875	In	16	0.0101888	0.982307
541	Diethyltoluamide	1	3	3	3	Good	0.274479	In	27	0.0186384	0.952341
181	Benzofluor	1	3	3	3	Good	0.269768	In	16	0.133841	0.72047
154	Bendiocarb	1	3	3	3	Good	0.26733	In	16	0.0478755	0.889063
984	Isocycloseram	1	3	3	3	Good	0.266689	In	16	0.135026	0.71879
231	Bromoxynil-butanoate	1	3	3	3	Good	0.264192	In	16	0.0490448	0.886722
440	Cyflumetofen	1	3	3	3	Good	0.262747	In	16	0.0495919	0.885648
947	Imidacloprid	1	3	3	3	Good	0.260989	In	16	0.0963081	0.790726
813	Fluothiuron	1	3	3	3	Good	0.260879	In	16	0.137286	0.715639
160	Benoxacor	1	3	3	3	Good	0.260667	In	16	0.0503875	0.884107
806	Fluoridamid	1	3	3	3	Good	0.257625	In	16	0.175193	0.652634
1402	Quinalphos	1	3	3	3	Good	0.257623	In	21	0.227259	0.661123
454	Cyprazine	1	3	3	3	Good	0.25738	In	16	0.000694	0.998795
1331	Propoxur	1	3	3	3	Good	0.256014	In	16	7.34e-06	0.999987
590	Dinoterb	1	3	3	3	Good	0.25571	In	16	0.0983802	0.787438
398	Clothianidin	1	3	3	3	Good	0.254978	In	16	0.139609	0.712468
1241	Pefurazoate	1	3	3	3	Good	0.254195	In	16	0.000941	0.998368
425	Cyclanilide	1	3	3	3	Good	0.252222	In	16	0.0997664	0.78528
520	Dichlozoline	1	3	3	3	Good	0.252222	In	16	0.0997664	0.78528
60	Acetamiprid	1	3	3	3	Good	0.250694	In	16	0.00273854	0.995267
1476	Sulfoxaflor	1	3	3	3	Good	0.24809	In	16	0.142354	0.708801
1081	Menazon	1	3	3	3	Good	0.246289	In	16	0.0561367	0.873599
525	Diclomezine	1	3	3	3	Good	0.245357	In	16	0.0565224	0.872927
488	Diafenthiuron	1	3	3	3	Good	0.238101	In	27	0.0191862	0.956999
144	Barban	1	3	3	3	Good	0.231736	In	16	0.0623071	0.863215
1565	Tralomethrin	1	3	3	3	Good	0.231464	In	16	0.0126106	0.978571
453	Cyphenothrin	1	3	3	3	Good	0.230353	In	28	0.00824379	0.98545
1099	Metamitron	1	3	3	3	Good	0.228358	In	16	0.0142052	0.975926
957	Indoxacarb	1	3	3	3	Good	0.227155	In	16	0.150899	0.697884
1136	Metobenzuron	1	3	3	3	Good	0.226682	In	16	0.0197094	0.957112
1576	Triamiphos	1	3	3	3	Good	0.225911	In	21	0.214551	0.669733
168	Benthiavalicarb	1	3	3	3	Good	0.222806	In	16	0.0331239	0.929772
1144	Metoxuron	1	3	3	3	Good	0.220399	In	16	0.0182912	0.969215
1053	MCPA-ethyl	1	3	3	3	Good	0.219281	In	16	0.0188652	0.968279
1060	MCPB	1	3	3	3	Good	0.219281	In	16	0.0188652	0.968279
1069	Mecoprop methyl	1	3	3	3	Good	0.219281	In	16	0.0188652	0.968279
1110	Methasulfocarb	1	3	3	3	Good	0.216765	In	16	0.068924	0.852786
1309	Proglinazine	1	3	3	3	Good	0.216223	In	16	0.0691676	0.852413
1564	Tralocythrin	1	3	3	3	Good	0.214905	In	16	0.0211118	0.964635
1317	Propachlor	1	3	3	3	Good	0.214514	In	28	0.000432	0.999236
200	Bioresmethrin	1	3	3	3	Good	0.21392	In	27	4.87e-06	0.999991
1417	Resmethrin	1	3	3	3	Good	0.21392	In	27	4.87e-06	0.999991
996	Isoprocarb	1	3	3	3	Good	0.213654	In	28	8.04e-06	0.999985
1061	M-cumenyl methylcarbamate	1	3	3	3	Good	0.213654	In	28	8.04e-06	0.999985
1615	Trimethacarb	1	3	3	3	Good	0.213654	In	28	8.04e-06	0.999985
375	Ciobutide	1	3	3	3	Good	0.213446	In	28	9.44e-05	0.999833
1044	Mandipropamid	1	3	3	3	Good	0.213075	In	16	0.0183864	0.968867
311	Chlorbufam	1	3	3	3	Good	0.209008	In	16	0.0241391	0.959768
941	Imazaquin methyl	1	3	3	3	Good	0.206767	In	16	0.0222667	0.960356
618	Drazoxolon	1	3	3	3	Good	0.205723	In	16	0.0739366	0.845255
1103	Metazoxolon	1	3	3	3	Good	0.205723	In	16	0.0739366	0.845255
486	Desmetryn	1	3	3	3	Good	0.204515	In	28	0.00449937	0.992121
1440	Simetryn	1	3	3	3	Good	0.204515	In	28	0.00449937	0.992121
137	Aziprotryne	1	3	3	3	Good	0.202711	In	16	0.0273718	0.954625
93	Ametoctradin	1	3	3	3	Good	0.200363	In	27	0.0151609	0.962599
1143	Metoxadiazone	1	3	3	3	Good	0.199979	In	16	0.0765805	0.841389
233	Brompyrazon	1	3	3	3	Good	0.198874	In	16	0.0293416	0.951518
179	Benzobicyclon	1	3	3	3	Good	0.195731	In	16	0.0203789	0.954936
410	Coumethoxystrobin	1	3	3	3	Good	0.19381	In	16	0.0208232	0.953377
445	Cyhalothrin	1	3	3	3	Good	0.192025	In	16	0.0562854	0.887533
879	Gamma-cyhalothrin	1	3	3	3	Good	0.192025	In	16	0.0562854	0.887533
1026	Lambda-cyhalothrin	1	3	3	3	Good	0.192025	In	16	0.0562854	0.887533
1001	Isopyrazam	1	3	3	3	Good	0.189159	In	28	0.0217258	0.95301
687	Fenaminstrobin	1	3	3	3	Good	0.185173	In	16	0.023237	0.946429
729	Fenquinotrione	1	3	3	3	Good	0.181983	In	16	0.038013	0.938077
333	Chloridazon	1	3	3	3	Good	0.181235	In	16	0.0383971	0.937491
1124	Methoxyfenozide	1	3	3	3	Good	0.180883	In	27	0.0107739	0.973852
349	Chlorotoluron	1	3	3	3	Good	0.180207	In	28	0.0164878	0.971723
442	Cyhalodiamide	1	3	3	3	Good	0.177067	In	16	0.152718	0.705552
1583	Triazophos	1	3	3	3	Good	0.174312	In	21	0.213126	0.693026
396	Cloquintocet-mexyl	1	3	3	3	Good	0.173471	In	28	0.0129514	0.96892
1013	Isoxathion	1	3	3	3	Good	0.173443	In	21	0.213121	0.693419
1391	Pyrimorph	1	3	3	3	Good	0.173054	In	27	0.0141413	0.967396
679	Etinofen	1	3	3	3	Good	0.171452	In	16	0.13456	0.738422
638	Epyrifenacil	1	3	3	3	Good	0.17093	In	16	0.155457	0.702427
476	Deltamethrin	1	3	3	3	Good	0.170535	In	28	0.0212579	0.963838
1229	Oxpoconazole	1	3	3	3	Good	0.168954	In	28	0.0152812	0.967506
1230	Oxpoconazole fumarate	1	3	3	3	Good	0.168954	In	28	0.0152812	0.967506
1118	Methiuron	1	3	3	3	Good	0.168279	In	27	0.0289353	0.935167
1439	Simeton	1	3	3	3	Good	0.167411	In	28	0.0227988	0.961318
196	Bifenthrin	1	3	3	3	Good	0.166918	In	16	0.0299018	0.932073
1018	Kappa-bifenthrin	1	3	3	3	Good	0.166918	In	16	0.0299018	0.932073
130	Atrazine	1	3	3	3	Good	0.166619	In	28	0.0231893	0.960682
629	Enoxastrobin	1	3	3	3	Good	0.166051	In	28	0.0234694	0.960226
989	Isoflucypram	1	3	3	3	Good	0.162792	In	16	0.0372925	0.926274
301	Chloraniformethan	1	3	3	3	Good	0.161679	In	16	0.139018	0.733129
1291	Plifenate	1	3	3	3	Good	0.160375	In	16	0.139616	0.732429
1346	Proximpham	1	3	3	3	Good	0.159459	In	28	0.0267205	0.954964
712	Fenoprop-methyl	1	3	3	3	Good	0.157491	In	16	0.0966862	0.813859
801	Fluometuron	1	3	3	3	Good	0.155008	In	16	0.0978837	0.812306
1235	Parafluron	1	3	3	3	Good	0.155008	In	16	0.0978837	0.812306
105	Aminocyclopyrachlor-methyl	1	3	3	3	Good	0.154113	In	16	0.0523205	0.916712
1487	Tebufenozide	1	3	3	3	Good	0.15384	In	27	0.027195	0.947215
89	Alpha-cypermethrin	1	3	3	3	Good	0.153271	In	28	0.0297724	0.950078
190	Beta-cypermethrin	1	3	3	3	Good	0.153271	In	28	0.0297724	0.950078
450	Cypermethrin	1	3	3	3	Good	0.153271	In	28	0.0297724	0.950078
1520	Theta-cypermethrin	1	3	3	3	Good	0.153271	In	28	0.0297724	0.950078
1638	Zeta-cypermethrin	1	3	3	3	Good	0.153271	In	28	0.0297724	0.950078
189	Beta-cyfluthrin	1	3	3	3	Good	0.152749	In	16	0.0359179	0.921227
441	Cyfluthrin	1	3	3	3	Good	0.152749	In	16	0.0359179	0.921227
310	Chlorbromuron	1	3	3	3	Good	0.152243	In	16	0.0532804	0.915313
1259	Phenothrin	1	3	3	3	Good	0.145639	In	27	0.0269676	0.952642
1481	Sumithrin	1	3	3	3	Good	0.145639	In	27	0.0269676	0.952642
276	Carbanolate	1	3	3	3	Good	0.142057	In	28	0.035303	0.941348
357	Chlorpropham	1	3	3	3	Good	0.142057	In	28	0.035303	0.941348
159	Benomyl	1	3	3	3	Good	0.141865	In	28	0.0353979	0.9412
363	Chlorthal-dimethyl	1	3	3	3	Good	0.141824	In	15	0.163507	0.748404
815	Fluoxapiprolin	1	3	3	3	Good	0.141207	In	16	0.0930856	0.827258
1598	Tridiphane	1	3	3	3	Good	0.140119	In	16	0.105103	0.803115
251	Buthiobate	1	3	3	3	Good	0.137636	In	27	0.0553529	0.877417
1250	Penthiopyrad	1	3	3	3	Good	0.136705	In	16	0.0410127	0.910378
1034	Linuron	1	3	3	3	Good	0.136015	In	16	0.0616115	0.903351
940	Imazaquin	1	3	3	3	Good	0.134915	In	28	0.0302991	0.938406
37	2,4-DB	1	3	3	3	Good	0.134763	In	16	0.0622544	0.902441
512	Dichlorprop-methyl	1	3	3	3	Good	0.134763	In	16	0.0622544	0.902441
516	Dichlorprop-methyl	1	3	3	3	Good	0.134763	In	16	0.0622544	0.902441
722	Fenpirithrin	1	3	3	3	Good	0.131803	In	28	0.0403602	0.933505
471	Debacarb	1	3	3	3	Good	0.131746	In	28	0.0403882	0.933462
686	Fenaminosulf	1	3	3	3	Good	0.130406	In	16	0.0644913	0.899288
314	Chlordimeform	1	3	3	3	Good	0.130043	In	27	0.0281086	0.940413
1397	Pyroquilon	1	3	3	3	Good	0.129143	In	27	0.0282343	0.939716
1623	Umifoxolaner	1	3	3	3	Good	0.126243	In	15	0.16711	0.763087
448	Cyometrinil	1	3	3	3	Good	0.12335	In	16	0.0440829	0.905235
1387	Pyrimidifen	1	3	3	3	Good	0.120048	In	27	0.0298302	0.932738
723	Fenpropathrin	1	3	3	3	Good	0.119037	In	27	0.0300419	0.931969
1137	Metobromuron	1	3	3	3	Good	0.118336	In	16	0.0454336	0.901587
760	Fluacrypyrim	1	3	3	3	Good	0.118049	In	16	0.0708351	0.890467
1064	Mecarbinzid	1	3	3	3	Good	0.116104	In	16	0.0460684	0.899973
567	Dimethomorph	1	3	3	3	Good	0.115568	In	28	0.0313461	0.927654
846	Fluxametamide	1	3	3	3	Good	0.113552	In	16	0.0954418	0.834147
1525	Thiazafluron	1	3	3	3	Good	0.113304	In	15	0.155022	0.765191
303	Chloranocryl	1	3	3	3	Good	0.112812	In	16	0.0470399	0.897602
459	Cypromid	1	3	3	3	Good	0.112812	In	16	0.0470399	0.897602
559	Dimetachlone	1	3	3	3	Good	0.111564	In	16	0.0741643	0.885906
1161	Monolinuron	1	3	3	3	Good	0.102107	In	16	0.0504618	0.889979
1379	Pyridafol	1	3	3	3	Good	0.101804	In	16	0.050564	0.889765
100	Amidoflumet	1	3	3	3	Good	0.101616	In	15	0.162961	0.777582
387	Clofibric acid	1	3	3	3	Good	0.100855	In	16	0.0508859	0.889095
1057	MCPA-methyl	1	3	3	3	Good	0.100855	In	16	0.0508859	0.889095
1066	Mecoprop	1	3	3	3	Good	0.100855	In	16	0.0508859	0.889095
622	Eglinazine	1	3	3	3	Good	0.0992189	In	16	0.0805019	0.877352
800	Flumorph	1	3	3	3	Good	0.0990266	In	28	0.0379273	0.915427
612	Diuron	1	3	3	3	Good	0.0984629	In	16	0.0517086	0.887413
323	Chlorfenprop-methyl	1	3	3	3	Good	0.0971584	In	16	0.0521639	0.886498
1326	Propham	1	3	3	3	Good	0.0922539	In	27	0.037568	0.912043
1633	XMC	1	3	3	3	Good	0.0922539	In	27	0.037568	0.912043
1636	Xylylcarb	1	3	3	3	Good	0.0922539	In	27	0.037568	0.912043
1007	Isoxaben	1	3	3	3	Good	0.0910898	In	27	0.0390212	0.909954
1111	Methazole	1	3	3	3	Good	0.0834828	In	16	0.132998	0.769975
1354	Pyraclonil	1	3	3	3	Good	0.0828532	In	28	0.0412537	0.907629
1602	Trifloxystrobin	1	3	3	3	Good	0.0826902	In	16	0.0693049	0.871107
395	Clopyralid-olamine	1	3	3	3	Good	0.0798686	In	16	0.0904358	0.864272
969	Ipconazole	1	3	3	3	Good	0.079039	In	27	0.0484511	0.908931
1488	Tebufenpyrad	1	3	3	3	Good	0.079039	In	27	0.0484511	0.908931
183	Benzovindiflupyr	1	3	3	3	Good	0.0784641	In	16	0.0622096	0.8716
1126	Methyl (((1-(5-(2-chloro-4-(trifluoromethyl)phenoxy)-2-nitrophenyl)-2-methoxyethylidene)amino)oxy)acetate	1	3	3	3	Good	0.0770734	In	16	0.136186	0.766396
570	Dimethyl phthalate	1	3	3	3	Good	0.075072	In	16	0.0604811	0.871289
433	Cyclopyrimorate	1	3	3	3	Good	0.0740561	In	28	0.0487731	0.897568
792	Fluindapyr	1	3	3	3	Good	0.0732917	In	28	0.0536102	0.895374
263	Cafenstrole	1	3	3	3	Good	0.0728926	In	28	0.0447584	0.901972
235	Bromuron	1	3	3	3	Good	0.0700136	In	27	0.0456875	0.896132
199	Biopermethrin	1	3	3	3	Good	0.0692926	In	27	0.0459686	0.895626
377	Cis-permethrin	1	3	3	3	Good	0.0692926	In	27	0.0459686	0.895626
1253	Permethrin	1	3	3	3	Good	0.0692926	In	27	0.0459686	0.895626
1569	Transpermethrin	1	3	3	3	Good	0.0692926	In	27	0.0459686	0.895626
681	Etoxazole	1	3	3	3	Good	0.0681245	In	27	0.0464259	0.894806
484	Denatonium benzoate	1	3	3	3	Good	0.0656196	In	27	0.0774924	0.849569
959	Inpyrfluxam	1	3	3	3	Good	0.0647647	In	28	0.0469843	0.896253
1622	Tyclopyrazoflor	1	3	3	3	Good	0.0638203	In	16	0.0688444	0.861794
1428	Semiamitraz hydrochloride	1	3	3	3	Good	0.0630408	In	27	0.0771962	0.851556
149	Benazolin	1	3	3	3	Good	0.062746	In	16	0.0992261	0.853018
1245	Penflufen	1	3	3	3	Good	0.0617932	In	27	0.0503777	0.896629
605	Disul	1	3	3	3	Good	0.0549423	In	15	0.14078	0.786452
584	Dinofenate	1	3	3	3	Good	0.0533488	In	15	0.140057	0.78739
1164	Monuron	1	3	3	3	Good	0.0531092	In	28	0.0508119	0.889354
165	Bensultap	1	3	3	3	Good	0.0513976	In	28	0.0512865	0.888177
1427	Sedaxane	1	3	3	3	Good	0.0509653	In	28	0.0512623	0.886708
1406	Quinoclamine	1	3	3	3	Good	0.0482895	In	16	0.0716869	0.853533
1381	Pyridate	1	3	3	3	Good	0.0460054	In	27	0.0541459	0.886293
1382	Pyridinitril	1	3	3	3	Good	0.0460054	In	27	0.0541459	0.886293
1489	Tebufloquin	1	3	3	3	Good	0.0449622	In	27	0.052664	0.884182
906	Haloxyfop-etotyl	1	3	3	3	Good	0.044021	In	16	0.088602	0.84571
1384	Pyrifluquinazon	1	3	3	3	Good	0.0439382	In	15	0.135821	0.792929
439	Cyflufenamid	1	3	3	3	Good	0.0407902	In	16	0.0902252	0.843655
1437	Simazine	1	3	3	3	Good	0.0388467	In	28	0.0550375	0.879642
810	Fluoroimide	1	3	3	3	Good	0.0366334	In	15	0.132571	0.797228
1025	Lactofen	1	3	3	3	Good	0.035844	In	16	0.134874	0.787254
1027	Lancotrione	1	3	3	3	Good	0.0357078	In	34	0.248711	0.618763
1548	Tiafenacil	1	3	3	3	Good	0.0350469	In	34	0.222602	0.612031
444	Cyhalofop-butyl	1	3	3	3	Good	0.0309933	In	28	0.0575991	0.874384
608	Disul-sodium	1	3	3	3	Good	0.0302741	In	15	0.129771	0.800971
171	Benzadox	1	3	3	3	Good	0.0287362	In	16	0.0803683	0.84102
1349	Pydiflumetofen	1	3	3	3	Good	0.0272987	In	16	0.0860268	0.838274
707	Fenoprop	1	3	3	3	Good	0.0271949	In	16	0.117477	0.830564
871	Furametpyr	1	3	3	3	Good	0.0259273	In	27	0.0581095	0.872081
1181	Napropamide	1	3	3	3	Good	0.0240602	In	27	0.0751213	0.878611
1182	Napropamide-M	1	3	3	3	Good	0.0240602	In	27	0.0751213	0.878611
104	Aminocyclopyrachlor	1	3	3	3	Good	0.0228482	In	16	0.0830425	0.837324
774	Fluchloraminopyr	1	3	3	3	Good	0.022163	In	15	0.126243	0.805745
842	Flutianil	1	3	3	3	Good	0.0208821	In	16	0.0839407	0.836097
1225	Oxaziclomefone	1	3	3	3	Good	0.0206578	In	27	0.0598708	0.869201
755	Flonicamid	1	3	3	3	Good	0.0176134	In	15	0.124286	0.808423
1441	Sintofen	1	3	3	3	Good	0.0132315	In	28	0.0638818	0.862721
1256	Phenisopham	1	3	3	3	Good	0.0122037	In	27	0.0621984	0.863646
705	Fenmezoditiaz	1	3	3	3	Good	0.0100585	In	28	0.0664688	0.859569
172	Benzadox ammonium	1	3	3	3	Good	0.009378	In	16	0.0892439	0.828989
545	Difenopenten-ethyl	1	3	3	3	Good	0.00924647	In	28	0.0789602	0.854311
399	Cloxyfonac	1	3	3	3	Good	0.0090644	In	16	0.0893896	0.828796
970	Ipfencarbazone	1	3	3	3	Good	0.00898627	In	16	0.0894258	0.828749
1320	Propanil	1	3	3	3	Good	0.00542423	In	28	0.06682	0.857693
364	Chlorthal-monomethyl	1	3	3	3	Good	0.00505752	In	15	0.118948	0.822744
763	Fluazifop-butyl	1	3	3	3	Good	0.00306565	In	28	0.0819096	0.850403
765	Fluazifop-P-butyl	1	3	3	3	Good	0.00306565	In	28	0.0819096	0.850403
1105	Metconazole	1	3	3	3	Good	0.00165947	In	27	0.0760345	0.863731
500	Dicamba methyl	1	3	3	3	Good	0.000859	In	16	0.0932177	0.823802
508	Dichlorprop	1	3	3	3	Good	0.000859	In	16	0.0932177	0.823802
513	Dichlorprop-P	1	3	3	3	Good	0.000859	In	16	0.0932177	0.823802
517	Dichlorprop-P	1	3	3	3	Good	0.000859	In	16	0.0932177	0.823802
741	Fenuron-TCA	1	3	3	3	Good	0.000175	In	27	0.0761487	0.862763
1531	Thiencarbazone-methyl	1	3	3	3	Good	0.000123	In	34	0.239574	0.602839
3	(R)-flufiprole	1	3	3	3	Good	-1.27e-05	In	15	0.114856	0.821416
791	Flufiprole	1	3	3	3	Good	-1.27e-05	In	15	0.114856	0.821416
147	Benalaxyl	1	3	3	3	Good	-0.000627	In	27	0.0762132	0.862241
148	Benalaxyl-M	1	3	3	3	Good	-0.000627	In	27	0.0762132	0.862241
1332	Propoxycarbazone	1	3	3	3	Good	-0.00670152	In	34	0.258811	0.604653
1390	Pyrimisulfan	1	3	3	3	Good	-0.00698681	In	16	0.0969081	0.819082
665	Ethoxyfen-ethyl	1	3	3	3	Good	-0.0077942	In	16	0.114756	0.813914
1620	Triticonazole	1	3	3	3	Good	-0.00926261	In	27	0.0770269	0.856658
740	Fenuron	1	3	3	3	Good	-0.00944385	In	27	0.0770463	0.856541
1373	Pyribencarb	1	3	3	3	Good	-0.00966279	In	27	0.068976	0.849602
1413	Quintrione	1	3	3	3	Good	-0.010497	In	28	0.0779003	0.84529
1145	Metrafenone	1	3	3	3	Good	-0.010528	In	27	0.0692635	0.849056
1420	Saflufenacil	1	3	3	3	Good	-0.0129185	In	34	0.233522	0.595843
977	Isamidofos	1	3	3	3	Good	-0.0143875	In	34	0.33258	0.516474
1612	Trifopsime	1	3	3	3	Good	-0.0147949	In	16	0.0898948	0.81948
575	Dimoxystrobin	1	3	3	3	Good	-0.0205795	In	27	0.0784159	0.84945
505	Dichlone	1	3	3	3	Good	-0.021994	In	16	0.104037	0.810204
1380	Pyridalyl	1	3	3	3	Good	-0.0232541	In	16	0.122597	0.804886
1388	Pyriminobac-methyl	1	3	3	3	Good	-0.0256943	In	28	0.0793111	0.83822
727	Fenpyrazone	1	3	3	3	Good	-0.0272279	In	16	0.102827	0.808351
748	Flamprop-isopropyl	1	3	3	3	Good	-0.0296653	In	27	0.0759317	0.83715
750	Flamprop-M-isopropyl	1	3	3	3	Good	-0.0296653	In	27	0.0759317	0.83715
1510	Tetflupyrolimet	1	3	3	3	Good	-0.0303175	In	16	0.096032	0.810291
1582	Triaziflam	1	3	3	3	Good	-0.0351041	In	27	0.0807057	0.840374
1117	Methiozolin	1	3	3	3	Good	-0.0374342	In	28	0.0791759	0.836502
392	Cloprop	1	3	3	3	Good	-0.039236	In	28	0.0850393	0.830019
1047	MCPA	1	3	3	3	Good	-0.039236	In	28	0.0850393	0.830019
1058	MCPA-olamine	1	3	3	3	Good	-0.039236	In	28	0.0850393	0.830019
1560	Toluene 2,4-diisocyanate	1	3	3	3	Good	-0.0393427	In	28	0.085085	0.829955
1392	Pyriofenone	1	3	3	3	Good	-0.0415511	In	27	0.0803285	0.829921
787	Flufenoxystrobin	1	3	3	3	Good	-0.044839	In	16	0.102003	0.80188
322	Chlorfenprop	1	3	3	3	Good	-0.0452178	In	28	0.0876125	0.826447
1360	Pyranocoumarin	1	3	3	3	Good	-0.0452871	In	27	0.0826277	0.834126
952	Indanofan	1	3	3	3	Good	-0.045562	In	27	0.082683	0.833959
1140	Metolcarb	1	3	3	3	Good	-0.051094	In	27	0.0838328	0.830605
389	Clofop-isobutyl	1	3	3	3	Good	-0.0521693	In	27	0.0840643	0.829956
1243	Pencycuron	1	3	3	3	Good	-0.0564681	In	27	0.10257	0.834384
869	Furalaxyl	1	3	3	3	Good	-0.0565869	In	27	0.0850419	0.827301
184	Benzoximate	1	3	3	3	Good	-0.0571409	In	28	0.0852616	0.825219
123	Anilofos	1	3	3	3	Good	-0.0584219	In	34	0.330376	0.541578
1296	Pretilachlor	1	3	3	3	Good	-0.060479	In	28	0.0864232	0.822698
1530	Thiencarbazone	1	3	3	3	Good	-0.0606223	In	34	0.253307	0.583281
933	Imazalil sulfate	1	3	3	3	Good	-0.0631972	In	28	0.0982768	0.814905
1375	Pyributicarb	1	3	3	3	Good	-0.0647625	In	27	0.10292	0.82936
682	Etridiazole	1	3	3	3	Good	-0.0678102	In	15	0.124755	0.845613
1043	Mandestrobin	1	3	3	3	Good	-0.0682864	In	27	0.103116	0.827244
1486	Tebuconazole	1	3	3	3	Good	-0.0724008	In	27	0.105558	0.825445
873	Furconazole	1	3	3	3	Good	-0.0742525	In	16	0.11801	0.784064
113	Amitraz	1	3	3	3	Good	-0.0790342	In	21	0.126564	0.773771
1356	Pyraflufen-ethyl	1	3	3	3	Good	-0.0820668	In	15	0.12699	0.85199
1012	Isoxapyrifop	1	3	3	3	Good	-0.0845234	In	28	0.0944164	0.809301
186	Benzoylprop-ethyl	1	3	3	3	Good	-0.0900696	In	27	0.0937025	0.807717
1202	Nornicotine	1	3	3	3	Good	-0.0903039	In	21	0.124157	0.780094
759	Florylpicoxamid	1	3	3	3	Good	-0.09061	In	28	0.0958016	0.807808
462	Cyromazine	1	3	3	3	Good	-0.0922615	In	27	0.094338	0.806467
1278	Picoxystrobin	1	3	3	3	Good	-0.0923416	In	28	0.108557	0.79935
1327	Propiconazole	1	3	3	3	Good	-0.0929333	In	27	0.0945344	0.806085
1570	Trans-propiconazole	1	3	3	3	Good	-0.0929333	In	27	0.0945344	0.806085
457	Cyproflanilide	1	3	3	3	Good	-0.0936042	In	15	0.0910728	0.866031
407	Coumachlor	1	3	3	3	Good	-0.0957374	In	27	0.0953613	0.804493
718	Fenoxasulfone	1	3	3	3	Good	-0.0975669	In	34	0.314352	0.582418
1482	Swep	1	3	3	3	Good	-0.0993587	In	28	0.111753	0.795466
1318	Propamidine	1	3	3	3	Good	-0.0996504	In	27	0.106046	0.808874
901	Halofenozide	1	3	3	3	Good	-0.100338	In	27	0.106134	0.80848
531	Dicoumarol	1	3	3	3	Good	-0.10264	In	28	0.101011	0.799103
271	Cambendichlor	1	3	3	3	Good	-0.108306	In	28	0.101551	0.79788
124	Anisuron	1	3	3	3	Good	-0.115251	In	27	0.101429	0.793589
1398	Pyroxasulfone	1	3	3	3	Good	-0.115801	In	34	0.258416	0.563905
408	Coumafuryl	1	3	3	3	Good	-0.116463	In	27	0.101822	0.792921
381	Cliodinate	1	3	3	3	Good	-0.117429	In	28	0.120052	0.785637
770	Flubenzimine	1	3	3	3	Good	-0.117916	In	15	0.116794	0.871363
521	Diclobutrazol	1	3	3	3	Good	-0.118034	In	27	0.11016	0.799099
1170	Myclobutanil hydrochloride	1	3	3	3	Good	-0.120576	In	27	0.11054	0.79768
1024	Kresoxim-methyl	1	3	3	3	Good	-0.123732	In	27	0.109667	0.795314
146	Beflubutamid	1	3	3	3	Good	-0.123757	In	28	0.109119	0.787536
767	Fluazolate	1	3	3	3	Good	-0.124076	In	15	0.133565	0.839273
1607	Triflumizole	1	3	3	3	Good	-0.126957	In	28	0.111259	0.785313
1632	Warfarin	1	3	3	3	Good	-0.128192	In	27	0.110458	0.792853
1276	Picloram-methyl	1	3	3	3	Good	-0.129067	In	15	0.110835	0.877926
1524	Thiapronil	1	3	3	3	Good	-0.130646	In	27	0.110909	0.791504
35	2,4,5-trichlorophenoxyacetic acid	1	3	3	3	Good	-0.130714	In	15	0.109955	0.878896
1588	Tricamba	1	3	3	3	Good	-0.130714	In	15	0.109955	0.878896
878	Furyloxyfen	1	3	3	3	Good	-0.130818	In	15	0.138219	0.829587
578	Diniconazole	1	3	3	3	Good	-0.132482	In	27	0.112479	0.791104
579	Diniconazole-M	1	3	3	3	Good	-0.132482	In	27	0.112479	0.791104
295	Chlobenthiazone	1	3	3	3	Good	-0.132938	In	27	0.107345	0.783957
834	Fluroxypyr	1	3	3	3	Good	-0.133636	In	15	0.0724139	0.889594
793	Flumetralin	1	3	3	3	Good	-0.135317	In	15	0.107495	0.881605
832	Fluridone	1	3	3	3	Good	-0.135497	In	27	0.10823	0.782583
614	DNOC	1	3	3	3	Good	-0.139638	In	15	0.105186	0.884149
868	Furalane	1	3	3	3	Good	-0.141587	In	27	0.110363	0.779332
39	2,4-DEP	1	3	3	3	Good	-0.142717	In	28	0.113821	0.779257
544	Difenopenten	1	3	3	3	Good	-0.148925	In	28	0.119252	0.774179
685	Fenamidone	1	3	3	3	Good	-0.149238	In	21	0.114126	0.813159
1084	Mephenate	1	3	3	3	Good	-0.150343	In	27	0.113492	0.774705
1204	Novaluron	1	3	3	3	Good	-0.151013	In	15	0.0749387	0.907676
1011	Isoxaflutole	1	3	3	3	Good	-0.151504	In	16	0.139214	0.748755
783	Flufenacet	1	3	3	3	Good	-0.151537	In	16	0.139228	0.748738
1322	Propaquizafop	1	3	3	3	Good	-0.158202	In	27	0.115095	0.775099
178	Benzipram	1	3	3	3	Good	-0.159192	In	21	0.103011	0.810965
36	2,4-D	1	3	3	3	Good	-0.160846	In	28	0.1403	0.762983
38	2,4-D-dimethylammonium	1	3	3	3	Good	-0.160846	In	28	0.1403	0.762983
497	Dicamba	1	3	3	3	Good	-0.160846	In	28	0.1403	0.762983
499	Dicamba diolamine	1	3	3	3	Good	-0.160846	In	28	0.1403	0.762983
1438	Simeconazole	1	3	3	3	Good	-0.161795	In	21	0.109525	0.818843
1574	Triafamone	1	3	3	3	Good	-0.162007	In	15	0.121793	0.84751
306	Chlorazifop propargyl	1	3	3	3	Good	-0.162719	In	27	0.118032	0.768257
1036	Lufenuron	1	3	3	3	Good	-0.163721	In	15	0.0743844	0.915155
362	Chlorthal	1	3	3	3	Good	-0.16451	In	15	0.0743703	0.91562
32	2,3,5-tri-iodobenzoic acid	1	3	3	3	Good	-0.16516	In	27	0.118942	0.766998
1169	Myclobutanil	1	3	3	3	Good	-0.165365	In	21	0.109042	0.820846
409	Coumatetralyl	1	3	3	3	Good	-0.166583	In	21	0.112098	0.82289
954	Indaziflam	1	3	3	3	Good	-0.170102	In	21	0.111743	0.824865
664	Ethoxyfen	1	3	3	3	Good	-0.170922	In	15	0.117111	0.852632
837	Flurtamone	1	3	3	3	Good	-0.172435	In	28	0.121608	0.767541
341	Chloroneb	1	3	3	3	Good	-0.172966	In	28	0.12178	0.767269
473	Defenuron	1	3	3	3	Good	-0.174197	In	21	0.111355	0.827162
318	Chlorfenac	1	3	3	3	Good	-0.174581	In	28	0.146774	0.756087
194	Bifenazate	1	3	3	3	Good	-0.174942	In	21	0.111287	0.82758
592	Diofenolan	1	3	3	3	Good	-0.175688	In	21	0.11122	0.827998
1010	Isoxadifen ethyl	1	3	3	3	Good	-0.177631	In	21	0.111049	0.829089
455	Cyproconazole	1	3	3	3	Good	-0.177934	In	21	0.107496	0.827897
924	Huanjunzuo	1	3	3	3	Good	-0.177934	In	21	0.107496	0.827897
1624	Uniconazole	1	3	3	3	Good	-0.177934	In	21	0.107496	0.827897
319	Chlorfenapyr	1	3	3	3	Good	-0.178453	In	28	0.132889	0.75861
1205	Noviflumuron	1	3	3	3	Good	-0.183119	In	15	0.09397	0.875049
383	Clodinafop propargyl	1	3	3	3	Good	-0.184626	In	28	0.125651	0.76134
728	Fenpyroximate	1	3	3	3	Good	-0.186145	In	21	0.107902	0.832987
202	Bipyrazone	1	3	3	3	Good	-0.186452	In	28	0.131873	0.756371
1550	Tigolaner	1	3	3	3	Good	-0.18723	In	15	0.0863777	0.899738
845	Fluvalinate	1	3	3	3	Good	-0.187476	In	27	0.123605	0.759508
1483	Tau-fluvalinate	1	3	3	3	Good	-0.187476	In	27	0.123605	0.759508
643	Etaconazole	1	3	3	3	Good	-0.187527	In	27	0.124528	0.762057
414	Crimidine	1	3	3	3	Good	-0.194251	In	21	0.109841	0.838413
689	Fenapanil	1	3	3	3	Good	-0.195077	In	21	0.0931536	0.828846
749	Flamprop-methyl	1	3	3	3	Good	-0.198231	In	27	0.127083	0.756102
751	Flamprop-M-methyl	1	3	3	3	Good	-0.198231	In	27	0.127083	0.756102
719	Fenoxycarb	1	3	3	3	Good	-0.198873	In	21	0.109585	0.841007
1592	Triclopyr	1	3	3	3	Good	-0.201354	In	15	0.0722044	0.920474
658	Ethiprole	1	3	3	3	Good	-0.201918	In	15	0.128507	0.828295
423	Cyazofamid	1	3	3	3	Good	-0.204093	In	27	0.129006	0.753729
380	Climbazole	1	3	3	3	Good	-0.204148	In	21	0.105098	0.842605
229	Bromopropylate	1	3	3	3	Good	-0.205158	In	21	0.109294	0.844533
64	Acetoprole	1	3	3	3	Good	-0.206451	In	15	0.126216	0.830847
818	Flupentiofenox	1	3	3	3	Good	-0.206833	In	34	0.289541	0.541401
809	Fluoroglycofen	1	3	3	3	Good	-0.207189	In	15	0.0690859	0.923909
216	Brofluthrinate	1	3	3	3	Good	-0.207803	In	21	0.127316	0.82152
1	(4-chlorophenoxy)acetic acid	1	3	3	3	Good	-0.208178	In	28	0.133882	0.74964
1594	Triclopyricarb	1	3	3	3	Good	-0.212039	In	28	0.135279	0.747756
1573	Triadimenol	1	3	3	3	Good	-0.214872	In	21	0.104453	0.848622
5	(R)-hexaconazole	1	3	3	3	Good	-0.21553	In	21	0.10442	0.848991
917	Hexaconazole	1	3	3	3	Good	-0.21553	In	21	0.10442	0.848991
41	2,5-dichlorobenzoic acid methyl ester	1	3	3	3	Good	-0.217853	In	28	0.137405	0.744937
347	Chlorothalonil	1	3	3	3	Good	-0.218331	In	15	0.0631314	0.930467
908	Haloxyfop-P-methyl	1	3	3	3	Good	-0.220239	In	28	0.149837	0.738681
416	Cumyluron	1	3	3	3	Good	-0.221475	In	21	0.0885297	0.845909
432	Cycloprothrin	1	3	3	3	Good	-0.222649	In	21	0.108836	0.854346
919	Hexaflumuron	1	3	3	3	Good	-0.223288	In	15	0.0412228	0.938028
843	Flutolanil	1	3	3	3	Good	-0.22374	In	27	0.134741	0.743549
1272	Phthalide	1	3	3	3	Good	-0.223899	In	15	0.0601561	0.933744
346	Chloropropylate	1	3	3	3	Good	-0.226511	In	21	0.108805	0.856513
778	Flucycloxuron	1	3	3	3	Good	-0.227579	In	21	0.12842	0.812646
1572	Triadimefon	1	3	3	3	Good	-0.230949	In	21	0.103863	0.857642
166	Bentaluron	1	3	3	3	Good	-0.233014	In	21	0.0922687	0.855057
426	Cyclaniliprole	1	3	3	3	Good	-0.233503	In	21	0.126406	0.815178
831	Flurenol-butyl	1	3	3	3	Good	-0.234943	In	21	0.0861773	0.853465
795	Flumetylsulforim	1	3	3	3	Good	-0.23686	In	34	0.347134	0.543415
553	Diflufenzopyr	1	3	3	3	Good	-0.236878	In	28	0.144542	0.735859
754	Flometoquin	1	3	3	3	Good	-0.236909	In	27	0.139943	0.735808
1008	Isoxachlortole	1	3	3	3	Good	-0.237711	In	21	0.136947	0.792721
1187	Nicofluprole	1	3	3	3	Good	-0.239008	In	15	0.112257	0.8458
485	Desmedipham	1	3	3	3	Good	-0.239636	In	21	0.108888	0.853182
779	Flucythrinate	1	3	3	3	Good	-0.240476	In	21	0.108903	0.852783
1258	Phenobenzuron	1	3	3	3	Good	-0.243155	In	21	0.10896	0.851511
215	Broflanilide	1	3	3	3	Good	-0.243326	In	15	0.0688067	0.91136
804	Fluopyram	1	3	3	3	Good	-0.245859	In	15	0.113222	0.843434
784	Flufenerim	1	3	3	3	Good	-0.25287	In	28	0.150731	0.728399
220	Bromethalin	1	3	3	3	Good	-0.255621	In	15	0.0731515	0.901305
966	Ioxynil	1	3	3	3	Good	-0.263329	In	21	0.109775	0.842053
672	Ethyl-DDD	1	3	3	3	Good	-0.263737	In	21	0.0757133	0.861064
1385	Pyriftalid	1	3	3	3	Good	-0.266981	In	21	0.109996	0.840364
1512	Tetraconazole	1	3	3	3	Good	-0.267896	In	15	0.138196	0.806819
546	Difenoxuron	1	3	3	3	Good	-0.270132	In	21	0.0816675	0.873208
870	Furalaxyl-M	1	3	3	3	Good	-0.272106	In	21	0.0752968	0.871555
185	Benzoylprop	1	3	3	3	Good	-0.273137	In	21	0.110416	0.837531
1093	Metaflumizone	1	3	3	3	Good	-0.273452	In	28	0.158919	0.719016
1619	Tripyrasulfone	1	3	3	3	Good	-0.273521	In	21	0.101213	0.858112
817	Fluoxytioconazole	1	3	3	3	Good	-0.275666	In	28	0.154686	0.721459
464	Daimuron	1	3	3	3	Good	-0.276206	In	21	0.0716378	0.86806
1132	Methyldymron	1	3	3	3	Good	-0.276206	In	21	0.0716378	0.86806
1389	Pyriminostrobin	1	3	3	3	Good	-0.2766	In	28	0.155011	0.721036
44	2-allyphenol	1	3	3	3	Good	-0.276989	In	21	0.0713877	0.868499
554	Diflumetorim	1	3	3	3	Good	-0.27943	In	21	0.11091	0.834654
208	Bistrifluron	1	3	3	3	Good	-0.281072	In	15	0.0210787	0.97204
524	Diclofop-methyl	1	3	3	3	Good	-0.283016	In	21	0.11122	0.833025
1101	Metazachlor	1	3	3	3	Good	-0.283054	In	21	0.0746995	0.878206
234	Bromuconazole	1	3	3	3	Good	-0.283753	In	21	0.105151	0.845667
299	Chloramben	1	3	3	3	Good	-0.284621	In	28	0.163454	0.714025
1141	Metominostrobin	1	3	3	3	Good	-0.285135	In	21	0.0805369	0.881625
1444	Sodium 5-nitroguaiacolate	1	3	3	3	Good	-0.285423	In	28	0.163782	0.713669
1559	Tolpyralate	1	3	3	3	Good	-0.288126	In	34	0.384177	0.533821
365	Chlorthiamid	1	3	3	3	Good	-0.288555	In	21	0.111739	0.830519
1273	Picarbutrazox	1	3	3	3	Good	-0.289026	In	21	0.0851532	0.885234
1252	Perfluidone	1	3	3	3	Good	-0.291034	In	28	0.166085	0.71119
747	Flamprop	1	3	3	3	Good	-0.296296	In	21	0.112545	0.827042
391	Clomeprop	1	3	3	3	Good	-0.298468	In	21	0.0799571	0.889106
1087	Mepronil	1	3	3	3	Good	-0.299583	In	21	0.0645074	0.881175
1393	Pyripropanol	1	3	3	3	Good	-0.300379	In	21	0.0642782	0.881622
671	Ethylchlozate	1	3	3	3	Good	-0.309505	In	21	0.0904954	0.869859
1123	Methoxychlor	1	3	3	3	Good	-0.311036	In	21	0.0797852	0.895754
931	Imazalil	1	3	3	3	Good	-0.312943	In	21	0.0719695	0.894976
932	Imazalil nitrate	1	3	3	3	Good	-0.312943	In	21	0.0719695	0.894976
1608	Triflumuron	1	3	3	3	Good	-0.314856	In	15	0.164301	0.77146
443	Cyhalofop	1	3	3	3	Good	-0.315416	In	21	0.114925	0.818579
300	Chloramben-ammonium	1	3	3	3	Good	-0.316849	In	15	0.163452	0.772518
905	Haloxyfop	1	3	3	3	Good	-0.319759	In	15	0.162218	0.774062
907	Haloxyfop-P	1	3	3	3	Good	-0.319759	In	15	0.162218	0.774062
1234	Oxyfluorfen	1	3	3	3	Good	-0.319759	In	15	0.162218	0.774062
1371	Pyribambenz-isopropyl	1	3	3	3	Good	-0.321678	In	21	0.0699122	0.899367
1372	Pyribambenz-propyl	1	3	3	3	Good	-0.321678	In	21	0.0699122	0.899367
68	Acifluorfen-methyl	1	3	3	3	Good	-0.321978	In	15	0.11784	0.831373
1395	Pyrisoxazole	1	3	3	3	Good	-0.322726	In	21	0.0583041	0.894159
1274	Picloram	1	3	3	3	Good	-0.326104	In	15	0.0759966	0.8884
340	Chlorobenzilate	1	3	3	3	Good	-0.327707	In	21	0.0801215	0.887455
803	Fluopimomide	1	3	3	3	Good	-0.329407	In	15	0.0374799	0.943707
836	Flurprimidol	1	3	3	3	Good	-0.330679	In	21	0.117205	0.811946
777	Flucofuron	1	3	3	3	Good	-0.33205	In	15	0.0734842	0.891731
1156	Modoflaner	1	3	3	3	Good	-0.333719	In	15	0.0238669	0.963728
1433	Silafluofen	1	3	3	3	Good	-0.337179	In	21	0.0602494	0.896072
640	Esfenvalerate	1	3	3	3	Good	-0.342079	In	21	0.0539861	0.905017
742	Fenvalerate	1	3	3	3	Good	-0.342079	In	21	0.0539861	0.905017
1361	Pyraoxystrobin	1	3	3	3	Good	-0.34611	In	21	0.0634483	0.91141
180	Benzofenap	1	3	3	3	Good	-0.346972	In	21	0.0634222	0.911893
351	Chloroxylenol	1	3	3	3	Good	-0.347179	In	21	0.0530075	0.907879
762	Fluazifop	1	3	3	3	Good	-0.348145	In	21	0.15874	0.743082
764	Fluazifop-P	1	3	3	3	Good	-0.348145	In	21	0.15874	0.743082
1552	Tiorantraniliprole	1	3	3	3	Good	-0.350974	In	21	0.0883575	0.862291
1155	Mivorilaner	1	3	3	3	Good	-0.357265	In	34	0.353917	0.510049
746	Fipronil	1	3	3	3	Good	-0.35945	In	15	0.022788	0.968692
106	Aminopyralid	1	3	3	3	Good	-0.359735	In	15	0.145891	0.795276
107	Aminopyralid-dimethylammonium	1	3	3	3	Good	-0.359735	In	15	0.145891	0.795276
526	Dicloran	1	3	3	3	Good	-0.359735	In	15	0.145891	0.795276
230	Bromoxynil	1	3	3	3	Good	-0.361355	In	21	0.122726	0.798936
12	1,1-bis(4-chlorophenyl)-2-ethoxyethanol	1	3	3	3	Good	-0.361911	In	21	0.0506106	0.916144
1107	Methabenzthiazuron	1	3	3	3	Good	-0.371769	In	21	0.0493974	0.921675
1246	Penfluron	1	3	3	3	Good	-0.372491	In	15	0.140966	0.802045
110	Amisulbrom	1	3	3	3	Good	-0.373284	In	21	0.136698	0.775747
899	Halauxifen-methyl	1	3	3	3	Good	-0.374929	In	21	0.125535	0.793311
1364	Pyrazachlor	1	3	3	3	Good	-0.376155	In	15	0.13958	0.803989
350	Chloroxuron	1	3	3	3	Good	-0.376586	In	21	0.0489274	0.924378
788	Flufenprox	1	3	3	3	Good	-0.378679	In	21	0.0715041	0.889815
1493	Tecloftalam	1	3	3	3	Good	-0.379988	In	15	0.138145	0.806023
1200	Norbormide	1	3	3	3	Good	-0.380225	In	21	0.0424035	0.921812
1009	Isoxadifen	1	3	3	3	Good	-0.381677	In	21	0.0485221	0.927234
2	(E)-2-(2-(2-(2,3-dichlorophenylamino)-6-trifluoromethylpyrimidin-4-yloxymethyl)phenyl)-3-methoxyacrylate	1	3	3	3	Good	-0.382744	In	21	0.127245	0.790108
744	Ferimzone	1	3	3	3	Good	-0.383211	In	11	0.04951	0.907382
33	2,3,6-TBA	1	3	3	3	Good	-0.383537	In	15	0.136831	0.807907
839	Flusulfamide	1	3	3	3	Good	-0.383854	In	15	0.0936916	0.865138
1242	Penconazole	1	3	3	3	Good	-0.38432	In	21	0.0415979	0.925389
900	Halfenprox	1	3	3	3	Good	-0.390124	In	21	0.0480627	0.931973
523	Diclofop	1	3	3	3	Good	-0.390554	In	21	0.0868734	0.857506
1359	Pyrametostrobin	1	3	3	3	Good	-0.391855	In	21	0.0420079	0.930805
20	1,3-dinitrobenzene	1	3	3	3	Good	-0.392865	In	15	0.133443	0.812856
766	Fluazinam	1	3	3	3	Good	-0.395187	In	15	0.0597338	0.920533
816	Fluoxastrobin	1	3	3	3	Good	-0.398746	In	21	0.102705	0.828969
42	2,6-dichloro-N-((4-(trifluoromethyl)phenyl)methyl-benzamide	1	3	3	3	Good	-0.40207	In	21	0.131749	0.782298
167	Bentazone	1	3	3	3	Good	-0.402294	In	13	0.391838	0.540543
195	Bifenox	1	3	3	3	Good	-0.41039	In	21	0.1338	0.778983
802	Fluopicolide	1	3	3	3	Good	-0.410582	In	15	0.173859	0.763283
422	Cyantraniliprole	1	3	3	3	Good	-0.411721	In	21	0.067527	0.890105
753	Flocoumafen	1	3	3	3	Good	-0.411947	In	21	0.0481417	0.931373
131	Azaconazole	1	3	3	3	Good	-0.412289	In	21	0.0788969	0.868829
867	Fuphenthiourea	1	3	3	3	Good	-0.412949	In	21	0.0989171	0.834158
1059	MCPA-thioethyl	1	3	3	3	Good	-0.413159	In	13	0.398171	0.517619
680	Etofenprox	1	3	3	3	Good	-0.416157	In	11	0.0416527	0.922303
1527	Thicyofen	1	3	3	3	Good	-0.417099	In	13	0.390122	0.53657
352	Chloroxynil	1	3	3	3	Good	-0.419312	In	21	0.13607	0.775459
8	1-(4-chlorophenyl)-3-(2,6-dichlorobenzoyl)urea	1	3	3	3	Good	-0.420474	In	21	0.0927225	0.843946
305	Chlorazifop	1	3	3	3	Good	-0.424434	In	21	0.0936019	0.842184
1396	Pyrithiobac-sodium	1	3	3	3	Good	-0.43434	In	21	0.0958989	0.837807
143	Azoxystrobin	1	3	3	3	Good	-0.434449	In	21	0.0501004	0.919837
121	Ancymidol	1	3	3	3	Good	-0.435774	In	21	0.0299534	0.948128
67	Acifluorfen	1	3	3	3	Good	-0.436108	In	15	0.119212	0.835804
971	Ipfentrifluconazole	1	3	3	3	Good	-0.436547	In	21	0.0719549	0.878237
1345	Protrifenbute	1	3	3	3	Good	-0.436935	In	11	0.0352569	0.933818
388	Clofop	1	3	3	3	Good	-0.437924	In	21	0.0505615	0.918081
1150	Metyltetraprole	1	3	3	3	Good	-0.43885	In	21	0.0405112	0.939331
1495	Teflubenzuron	1	3	3	3	Good	-0.443778	In	15	0.116984	0.839874
897	Halacrinate	1	3	3	3	Good	-0.445523	In	21	0.0705308	0.879825
382	Clodinafop	1	3	3	3	Good	-0.449764	In	21	0.0997332	0.831082
715	Fenoxaprop-ethyl	1	3	3	3	Good	-0.449887	In	21	0.0524448	0.912086
717	Fenoxaprop-P-ethyl	1	3	3	3	Good	-0.449887	In	21	0.0524448	0.912086
1412	Quintozene	1	3	3	3	Good	-0.451173	In	15	0.0613012	0.936753
1447	Sodium lignosulfonate	1	3	3	3	Good	-0.453543	In	13	0.392714	0.532243
1448	Sodium metabisulphite	1	3	3	3	Good	-0.453543	In	13	0.392714	0.532243
1494	Tecnazene	1	3	3	3	Good	-0.455211	In	15	0.0464944	0.943809
819	Flupoxam	1	3	3	3	Good	-0.457646	In	21	0.141492	0.767968
781	Fluenetil	1	3	3	3	Good	-0.460237	In	21	0.0208802	0.961853
205	Bispyribac	1	3	3	3	Good	-0.464514	In	21	0.0878678	0.849772
1414	Quizalofop-ethyl	1	3	3	3	Good	-0.470053	In	21	0.0320876	0.948379
772	Flucetosulfuron	1	3	3	3	Good	-0.470693	In	13	0.392582	0.528567
1112	Methfuroxam	1	3	3	3	Good	-0.471086	In	11	0.0261638	0.9515
1102	Metazosulfuron	1	3	3	3	Good	-0.471831	In	13	0.392728	0.527651
551	Diflubenzuron	1	3	3	3	Good	-0.474511	In	21	0.106462	0.820514
1142	Metosulam	1	3	3	3	Good	-0.474898	In	21	0.0970836	0.835058
1091	Mesosulfuron-methyl	1	3	3	3	Good	-0.475135	In	13	0.392801	0.527869
596	Diphenamid	1	3	3	3	Good	-0.478767	In	11	0.0376777	0.949957
1366	Pyrazolynate	1	3	3	3	Good	-0.4812	In	21	0.0472237	0.917724
988	Isofetamid	1	3	3	3	Good	-0.481324	In	13	0.412501	0.485391
1192	Nitrapyrin	1	3	3	3	Good	-0.481712	In	21	0.153697	0.751678
40	2,4-dimethylphenol	1	3	3	3	Good	-0.482801	In	11	0.0359948	0.952193
397	Cloransulam	1	3	3	3	Good	-0.485089	In	21	0.13713	0.775329
757	Florpyrauxifen	1	3	3	3	Good	-0.486268	In	21	0.155088	0.749999
304	Chlorantraniliprole	1	3	3	3	Good	-0.490965	In	21	0.049599	0.912882
1186	Niclosamide	1	3	3	3	Good	-0.492771	In	21	0.111818	0.812887
898	Halauxifen	1	3	3	3	Good	-0.494282	In	21	0.112274	0.812263
527	Dicloromezotiaz	1	3	3	3	Good	-0.49432	In	21	0.0504699	0.911231
1383	Pyrifenox	1	3	3	3	Good	-0.496847	In	21	0.0126298	0.982393
529	Dicofol	1	3	3	3	Good	-0.498861	In	21	0.0640069	0.888341
140	Azoluron	1	3	3	3	Good	-0.50001	In	21	0.0209207	0.967489
1517	Tetraniliprole	1	3	3	3	Good	-0.50018	In	21	0.100969	0.829636
1401	Quinacetol sulphate	1	3	3	3	Good	-0.500338	In	21	0.0539601	0.905124
1299	Probenazole	1	3	3	3	Good	-0.500516	In	13	0.397936	0.526934
501	Dichlobenil	1	3	3	3	Good	-0.501962	In	21	0.0649001	0.886879
808	Fluorodifen	1	3	3	3	Good	-0.502994	In	15	0.145547	0.810896
1125	Methoxyphenone	1	3	3	3	Good	-0.505402	In	11	0.0265646	0.964717
30	2-(thiocyanomethylthio)benzothiazole	1	3	3	3	Good	-0.508646	In	21	0.0110141	0.985635
328	Chlorfluazuron	1	3	3	3	Good	-0.510293	In	15	0.159137	0.794131
1226	Oxazosulfyl	1	3	3	3	Good	-0.512164	In	21	0.145555	0.765007
1370	Pyrazoxyfen	1	3	3	3	Good	-0.514286	In	21	0.0174178	0.969073
786	Flufenoxuron	1	3	3	3	Good	-0.517032	In	21	0.164781	0.738853
332	Chlorflurenol methyl	1	3	3	3	Good	-0.517258	In	21	0.0148579	0.973568
852	Foramsulfuron	1	3	3	3	Good	-0.517954	In	13	0.396217	0.523159
769	Flubeneteram	1	3	3	3	Good	-0.51809	In	21	0.128028	0.790409
394	Clopyralid	1	3	3	3	Good	-0.519574	In	21	0.165604	0.737946
684	Famoxadone	1	3	3	3	Good	-0.519983	In	21	0.00613714	0.991996
1355	Pyraclostrobin	1	3	3	3	Good	-0.520333	In	21	0.0189248	0.965834
543	Difenoconazole	1	3	3	3	Good	-0.522164	In	21	0.0194266	0.964858
735	Fenthiaprop ethyl	1	3	3	3	Good	-0.522303	In	21	0.0274834	0.950547
1357	Pyrafluprole	1	3	3	3	Good	-0.52783	In	21	0.131188	0.786587
1611	Triflusulfuron-methyl	1	3	3	3	Good	-0.531276	In	13	0.39624	0.519207
187	Benzthiazuron	1	3	3	3	Good	-0.532868	In	21	0.000594	0.999225
1090	Mesosulfuron	1	3	3	3	Good	-0.532997	In	13	0.396137	0.519867
776	Fluchlordiniliprole	1	3	3	3	Good	-0.540742	In	21	0.10128	0.831696
916	Hexachlorophene	1	3	3	3	Good	-0.543706	In	21	0.128127	0.792344
1248	Pentachlorophenol	1	3	3	3	Good	-0.545285	In	15	0.0994292	0.89374
1002	Isopyrimol	1	3	3	3	Good	-0.545463	In	11	0.00984891	0.986919
296	Chlomethoxyfen	1	3	3	3	Good	-0.54994	In	21	0.080293	0.864857
470	DDT	1	3	3	3	Good	-0.553555	In	21	0.0266568	0.954331
1207	O,O'-DDT	1	3	3	3	Good	-0.553555	In	21	0.0266568	0.954331
1208	O,P'-DDT	1	3	3	3	Good	-0.553555	In	21	0.0266568	0.954331
209	Bitertanol	1	3	3	3	Good	-0.563801	In	11	0.0243576	0.955618
1369	Pyrazosulfuron-ethyl	1	3	3	3	Good	-0.566612	In	13	0.398936	0.516229
549	Difethialone	1	3	3	3	Good	-0.567625	In	11	0.0327884	0.940384
277	Carbaryl	1	3	3	3	Good	-0.569058	In	11	4.15e-06	0.999994
693	Fenazaquin	1	3	3	3	Good	-0.570688	In	11	0.0486687	0.912555
1407	Quinofumelin	1	3	3	3	Good	-0.57222	In	11	0.00131523	0.998256
695	Fenchlorazole	1	3	3	3	Good	-0.57345	In	21	0.175771	0.729683
434	Cyclosulfamuron	1	3	3	3	Good	-0.574553	In	13	0.402484	0.516714
956	Indolauxipyr-cyanomethyl	1	3	3	3	Good	-0.576977	In	21	0.0898986	0.852922
342	Chlorophacinone	1	3	3	3	Good	-0.578521	In	11	0.00394441	0.994788
279	Carbendazim	1	3	3	3	Good	-0.579651	In	21	0.0195312	0.97516
1215	Orthosulfamuron	1	3	3	3	Good	-0.580301	In	13	0.402643	0.515852
330	Chlorfluren methyl	1	3	3	3	Good	-0.581683	In	11	0.00526401	0.993057
[truncated: 243 more rows]

[truncated: 1 more sheets: PRI Result of model M5]
